# Supplementary material for: Global antibiotic dosing strategies in hospitalised children: Characterising variation and implications for harmonisation of international guidelines
Source: PLoS One. 2021 May 27;16(5):e0252223. doi: 10.1371/journal.pone.0252223 (PMC8159011; doi:10.1371/journal.pone.0252223)
Supplement: S1 Data — (CSV) [file pone.0252223.s007.csv]

pps_patient_id	PPS	region	country	hospital	gender	age_months	weight_kg	antibiotic	dose	unit	frequency	daily_dose	mgperkgperday	diagnosis	indication	empiric	ventilated	tot_drugs	tot_ab	n_underlying	specific_comorb_renal	specific_comorb_liver	comorb_Cardiovascular	comorb_Endocrine	comorb_Gastrointestinal	comorb_Hematologic_immunologic	comorb_Malignancy	comorb_Metabolic	comorb_Musculoskeletal	comorb_Neuromuscular	comorb_Other_congenital_genetic	comorb_Other_diseases_conditions	comorb_Perinatal	comorb_Renal	comorb_Respiratory
Pilot PPS/C5H6P1	Pilot PPS	Americas	C5	H6	Male	48	9	Amikacin	30	mg	1	30	3.3333333333333335	Bacterial LRTI	HAI	Targeted	No Ventilation	2	2	1	0	0	0	0	0	0	0	0	0	0	0	0	0	0	1
Pilot PPS/C5H6P2	Pilot PPS	Americas	C5	H6	Male	48	9	Meropenem	300	mg	2	600	66.66666666666667	Bacterial LRTI	HAI	Targeted	No Ventilation	2	2	1	0	0	0	0	0	0	0	0	0	0	0	0	0	0	1
Pilot PPS/C5H6P3	Pilot PPS	Americas	C5	H6	Female	48	14	Ampicillin	300	mg	4	1200	85.71428571428571	Bacterial LRTI	CAI	Empirical: awaiting culture	No Ventilation	1	1	1	0	0	0	0	0	0	0	0	0	0	0	0	0	0	1
Pilot PPS/C5H6P4	Pilot PPS	Americas	C5	H6	Male	2	6	Cefotaxime	300	mg	3	900	150	Central Nervous System (CNS) infections	CAI	Targeted	No Ventilation	1	1
1st PPS/C5H6P5	1st PPS	Americas	C5	H6	Female	24	17.700000762939453	Clindamycin	40	mg	3	120	6.7796607247191725	Skin/Soft Tissue Infections (SSTI)	CAI	Empirical: awaiting culture	No Ventilation	2	2	0	0	0	0	0	0	0	0	0	0	0	0	0	0	0	0
1st PPS/C5H6P6	1st PPS	Americas	C5	H6	Female	12	12	Clindamycin	40	mg	3	120	10	Skin/Soft Tissue Infections (SSTI)	CAI	Empirical: awaiting culture	No Ventilation	2	2	0	0	0	0	0	0	0	0	0	0	0	0	0	0	0	0
1st PPS/C5H6P7	1st PPS	Americas	C5	H6	Male	2	6	Ceftriaxone	100	mg	2	200	33.333333333333336	Central Nervous System (CNS) infections	CAI	Empirical: pathogen determined	Unknown	3	2	0	0	0	0	0	0	0	0	0	0	0	0	0	0	0	0
1st PPS/C5H6P8	1st PPS	Americas	C5	H6	Male	2	6	Ampicillin	300	mg	4	1200	200	Central Nervous System (CNS) infections	CAI	Empirical: pathogen determined	Unknown	3	2	0	0	0	0	0	0	0	0	0	0	0	0	0	0	0	0
1st PPS/C5H6P9	1st PPS	Americas	C5	H6	Male	2	6	Ampicillin	150	mg	4	600	100	Skin/Soft Tissue Infections (SSTI)	CAI	Empirical: pathogen determined	No Ventilation	2	2	0	0	0	0	0	0	0	0	0	0	0	0	0	0	0	0
1st PPS/C5H6P10	1st PPS	Americas	C5	H6	Male	2	6	Ceftriaxone	100	mg	2	200	33.333333333333336	Central Nervous System (CNS) infections	CAI	Empirical: pathogen determined	No Ventilation	2	2	0	0	0	0	0	0	0	0	0	0	0	0	0	0	0	0
2nd PPS/C5H6P11	2nd PPS	Americas	C5	H6	Female	17	8.899999618530273	Vancomycin	40	mg	2	80	8.988764430218147	Sepsis	CAI	Targeted	No Ventilation	2	2	0	0	0	0	0	0	0	0	0	0	0	0	0	0	0	0
2nd PPS/C5H6P12	2nd PPS	Americas	C5	H6	Female	2	4	Ceftriaxone	40	mg	2	80	20	Bacterial LRTI	CAI	Empirical: awaiting culture	No Ventilation	3	2	1	0	0	0	0	0	0	0	0	0	0	0	0	1	0	0
2nd PPS/C5H6P13	2nd PPS	Americas	C5	H6	Female	2	3.9000000953674316	Ceftriaxone	50	mg	2	100	25.641025014020848	Urinary Tract Infections (UTI)	CAI	Targeted	No Ventilation	1	1	1	0	0	0	0	0	0	0	0	0	0	0	0	1	0	0
2nd PPS/C5H6P14	2nd PPS	Americas	C5	H6	Female	2	5	Ceftriaxone	50	mg	2	100	20	Bacterial LRTI	CAI	Empirical: pathogen determined	No Ventilation	1	1	0	0	0	0	0	0	0	0	0	0	0	0	0	0	0	0
2nd PPS/C5H6P15	2nd PPS	Americas	C5	H6	Male	11	11	Ampicillin	60	mg	4	240	21.818181818181817	Bacterial LRTI	CAI	Empirical: pathogen determined	No Ventilation	1	1	0	0	0	0	0	0	0	0	0	0	0	0	0	0	0	0
2nd PPS/C5H6P16	2nd PPS	Americas	C5	H6	Female	11	12	Ampicillin	80	mg	4	320	26.666666666666668	Bacterial LRTI	CAI	Empirical: pathogen determined	No Ventilation	1	1	0	0	0	0	0	0	0	0	0	0	0	0	0	0	0	0
2nd PPS/C5H6P17	2nd PPS	Americas	C5	H6	Male	5	6.5	Ceftriaxone	40	mg	2	80	12.307692307692308	Bacterial LRTI	CAI	Empirical: pathogen determined	No Ventilation	1	1	0	0	0	0	0	0	0	0	0	0	0	0	0	0	0	0
2nd PPS/C5H6P18	2nd PPS	Americas	C5	H6	Female	1	2.5999999046325684	Cefotaxime	80	mg	2	160	61.538463795678936	Bacterial LRTI	HAI	Empirical: pathogen determined	No Ventilation	2	2	0	0	0	0	0	0	0	0	0	0	0	0	0	0	0	0
2nd PPS/C5H6P19	2nd PPS	Americas	C5	H6	Female	1	2.5999999046325684	Ampicillin	50	mg	4	200	76.92307974459867	Bacterial LRTI	HAI	Empirical: pathogen determined	No Ventilation	2	2	0	0	0	0	0	0	0	0	0	0	0	0	0	0	0	0
2nd PPS/C5H6P20	2nd PPS	Americas	C5	H6	Male	5	7.300000190734863	Ampicillin	75	mg	4	300	41.0958893372029	Bacterial LRTI	CAI	Empirical: pathogen determined	No Ventilation	1	1	0	0	0	0	0	0	0	0	0	0	0	0	0	0	0	0
2nd PPS/C5H6P21	2nd PPS	Americas	C5	H6	Female	19	9.5	Clindamycin	40	mg	3	120	12.631578947368421	Skin/Soft Tissue Infections (SSTI)	CAI	Empirical: pathogen determined	No Ventilation	1	1	0	0	0	0	0	0	0	0	0	0	0	0	0	0	0	0
2nd PPS/C5H6P22	2nd PPS	Americas	C5	H6	Female	3	3.799999952316284	Ceftriaxone	40	mg	2	80	21.052631843123084	Bacterial LRTI	CAI	Empirical: pathogen determined	No Ventilation	2	1	0	0	0	0	0	0	0	0	0	0	0	0	0	0	0	0
2nd PPS/C5H6P23	2nd PPS	Americas	C5	H6	Female	18	9.399999618530273	Ceftriaxone	40	mg	2	80	8.510638643250106	Bacterial LRTI	CAI	Empirical: awaiting culture	No Ventilation	2	2	0	0	0	0	0	0	0	0	0	0	0	0	0	0	0	0
2nd PPS/C5H6P24	2nd PPS	Americas	C5	H6	Female	18	9.399999618530273	Ampicillin	60	mg	4	240	25.53191592975032	Unknown	Unknown	Unknown	No Ventilation	2	2	0	0	0	0	0	0	0	0	0	0	0	0	0	0	0	0
2nd PPS/C5H6P25	2nd PPS	Americas	C5	H6	Female	2	4.199999809265137	Ceftriaxone	40	mg	2	80	19.047619912629806	Bacterial LRTI	CAI	Empirical: pathogen determined	No Ventilation	2	2	1	0	0	0	0	0	0	0	0	0	0	0	0	1	0	0
2nd PPS/C5H6P26	2nd PPS	Americas	C5	H6	Female	2	4.199999809265137	Ampicillin	70	mg	4	280	66.66666969420432	Bacterial LRTI	CAI	Empirical: pathogen determined	No Ventilation	2	2	1	0	0	0	0	0	0	0	0	0	0	0	0	1	0	0
2nd PPS/C5H6P27	2nd PPS	Americas	C5	H6	Female	1	3.700000047683716	Ceftriaxone	40	mg	2	80	21.621621342973178	Bacterial LRTI	CAI	Empirical: awaiting culture	No Ventilation	1	1	0	0	0	0	0	0	0	0	0	0	0	0	0	0	0	0
3rd PPS/C5H6P28	3rd PPS	Americas	C5	H6	Female	48	14	Ceftazidime	150	mg	2	300	21.428571428571427	Skin/Soft Tissue Infections (SSTI)	CAI	Empirical: awaiting culture	No Ventilation	2	2	0	0	0	0	0	0	0	0	0	0	0	0	0	0	0	0
3rd PPS/C5H6P29	3rd PPS	Americas	C5	H6	Female	48	14	Clindamycin	40	mg	4	160	11.428571428571429	Skin/Soft Tissue Infections (SSTI)	CAI	Empirical: awaiting culture	No Ventilation	2	2	0	0	0	0	0	0	0	0	0	0	0	0	0	0	0	0
3rd PPS/C5H6P30	3rd PPS	Americas	C5	H6	Male	1	4.699999809265137	Ceftriaxone	100	mg	2	200	42.55319321625053	Bacterial LRTI	CAI	Empirical: awaiting culture	No Ventilation	1	1	0	0	0	0	0	0	0	0	0	0	0	0	0	0	0	0
4th PPS/C5H6P31	4th PPS	Americas	C5	H6	Female	15	7	Co-amoxiclav	150	mg	4	600	85.71428571428571	Bacterial LRTI	CAI	Empirical: pathogen determined	No Ventilation	1	1	1	0	0	0	0	0	0	0	0	0	0	0	1	0	0	0
4th PPS/C5H6P32	4th PPS	Americas	C5	H6	Female	48	17	Clindamycin	40	mg	3	120	7.0588235294117645	Skin/Soft Tissue Infections (SSTI)	CAI	Empirical: awaiting culture	No Ventilation	2	2	0	0	0	0	0	0	0	0	0	0	0	0	0	0	0	0
4th PPS/C5H6P33	4th PPS	Americas	C5	H6	Female	5	7.099999904632568	Clindamycin	40	mg	3	120	16.901408677724497	Skin/Soft Tissue Infections (SSTI)	CAI	Empirical: awaiting culture	No Ventilation	2	2	0	0	0	0	0	0	0	0	0	0	0	0	0	0	0	0
4th PPS/C5H6P34	4th PPS	Americas	C5	H6	Male	7	5.400000095367432	Ceftriaxone	150	mg	2	300	55.55555457440916	Bacterial LRTI	CAI	Empirical: awaiting culture	No Ventilation	1	1	0	0	0	0	0	0	0	0	0	0	0	0	0	0	0	0
4th PPS/C5H6P35	4th PPS	Americas	C5	H6	Female	108	46	Pip-taz	4500	mg	3	13500	293.4782608695652	Skin/Soft Tissue Infections (SSTI)	HAI	Empirical: pathogen determined	No Ventilation	2	2	0	0	0	0	0	0	0	0	0	0	0	0	0	0	0	0
4th PPS/C5H6P36	4th PPS	Americas	C5	H6	Female	108	46	Vancomycin	1000	mg	4	4000	86.95652173913044	Skin/Soft Tissue Infections (SSTI)	HAI	Targeted	No Ventilation	2	2	0	0	0	0	0	0	0	0	0	0	0	0	0	0	0	0
Pilot PPS/C23H65P1	Pilot PPS	Western Pacific	C23	H65	Male	96	47	Ceftriaxone	2000	mg	2	4000	85.1063829787234	Sepsis	CAI	Targeted	No Ventilation	1	1
Pilot PPS/C23H65P2	Pilot PPS	Western Pacific	C23	H65	Male	60	24	Metronidazole	180	mg	3	540	22.5	Upper Respiratory Infections (URTI)	CAI	Empirical: no culture	No Ventilation	3	3	1	0	0	0	0	0	0	0	0	0	1	0	0	0	0	0
Pilot PPS/C23H64P1	Pilot PPS	Western Pacific	C23	H64	Female	72	16	Metronidazole	200	mg	3	600	37.5	Treatment for Surgical disease	HAI	Empirical: no culture	No Ventilation	2	2
Pilot PPS/C23H65P3	Pilot PPS	Western Pacific	C23	H65	Male	5	7.599999904632568	Pip-taz	790	mg	3	2370	311.84210917626064	Other	HAI	Targeted	No Ventilation	2	1	1	0	0	0	0	0	0	0	0	0	0	0	1	0	0	0
Pilot PPS/C23H65P4	Pilot PPS	Western Pacific	C23	H65	Female	108	29	Teicoplanin	290	mg	2	580	20	Sepsis	HAI	Targeted	No Ventilation	1	1	3	0	0	0	0	0	0	0	0	0	1	0	2	0	0	0
Pilot PPS/C23H65P5	Pilot PPS	Western Pacific	C23	H65	Male	10	8.5	Teicoplanin	130	mg	4	520	61.1764705882353	Sepsis	CAI	Targeted	No Ventilation	1	1	1	0	0	0	0	0	1	0	0	0	0	0	0	0	0	0
1st PPS/C23H65P6	1st PPS	Western Pacific	C23	H65	Female	84	21.799999237060547	Vancomycin	412.5	mg	4	1650	75.68807604336786	Febrile neutropenia/Fever	HAI	Empirical: awaiting culture	No Ventilation	4	4	1	0	0	0	0	0	0	1	0	0	0	0	0	0	0	0
1st PPS/C23H65P7	1st PPS	Western Pacific	C23	H65	Female	84	21.799999237060547	Pip-taz	2200	mg	4	8800	403.6697388979619	Febrile neutropenia/Fever	HAI	Empirical: awaiting culture	No Ventilation	4	4	1	0	0	0	0	0	0	1	0	0	0	0	0	0	0	0
1st PPS/C23H65P8	1st PPS	Western Pacific	C23	H65	Female	84	21.799999237060547	Amikacin	490	mg	1	490	22.477065006818336	Febrile neutropenia/Fever	HAI	Empirical: awaiting culture	No Ventilation	4	4	1	0	0	0	0	0	0	1	0	0	0	0	0	0	0	0
1st PPS/C23H65P9	1st PPS	Western Pacific	C23	H65	Male	72	21.5	Ceftriaxone	1000	mg	1	1000	46.51162790697674	Bacterial LRTI	CAI	Empirical: awaiting culture	No Ventilation	1	1	1	0	0	0	0	0	0	0	0	0	0	0	0	0	0	1
1st PPS/C23H65P10	1st PPS	Western Pacific	C23	H65	Female	132	36	Gentamicin	180	mg	1	180	5	GI tract infections	CAI	Empirical: awaiting culture	No Ventilation	3	3	0	0	0	0	0	0	0	0	0	0	0	0	0	0	0	0
1st PPS/C23H65P11	1st PPS	Western Pacific	C23	H65	Female	132	36	Metronidazole	270	mg	3	810	22.5	GI tract infections	CAI	Empirical: awaiting culture	No Ventilation	3	3	0	0	0	0	0	0	0	0	0	0	0	0	0	0	0	0
1st PPS/C23H65P12	1st PPS	Western Pacific	C23	H65	Female	9	7	Gentamicin	52.5	mg	1	52.5	7.5	CRBSI	HAI	Empirical: pathogen determined	No Ventilation	2	2	1	0	0	1	0	0	0	0	0	0	0	0	0	0	0	0
1st PPS/C23H65P13	1st PPS	Western Pacific	C23	H65	Female	9	7	Vancomycin	105	mg	4	420	60	CRBSI	HAI	Empirical: pathogen determined	No Ventilation	2	2	1	0	0	1	0	0	0	0	0	0	0	0	0	0	0	0
1st PPS/C23H65P14	1st PPS	Western Pacific	C23	H65	Female	96	47	Gentamicin	320	mg	1	320	6.808510638297872	GI tract infections	CAI	Empirical: awaiting culture	No Ventilation	3	3	0	0	0	0	0	0	0	0	0	0	0	0	0	0	0	0
1st PPS/C23H65P15	1st PPS	Western Pacific	C23	H65	Female	96	47	Metronidazole	350	mg	3	1050	22.340425531914892	GI tract infections	CAI	Empirical: awaiting culture	No Ventilation	3	3	0	0	0	0	0	0	0	0	0	0	0	0	0	0	0	0
1st PPS/C23H65P16	1st PPS	Western Pacific	C23	H65	Male	132	40	Pip-taz	4000	mg	4	16000	400	GI tract infections	CAI	Empirical: awaiting culture	No Ventilation	1	1	0	0	0	0	0	0	0	0	0	0	0	0	0	0	0	0
1st PPS/C23H65P17	1st PPS	Western Pacific	C23	H65	Female	60	23.200000762939453	Gentamicin	100	mg	1	100	4.310344685839137	Bacterial LRTI	CAI	Empirical: awaiting culture	No Ventilation	2	2	0	0	0	0	0	0	0	0	0	0	0	0	0	0	0	0
1st PPS/C23H65P18	1st PPS	Western Pacific	C23	H65	Male	84	33	Pip-taz	3000	mg	3	9000	272.72727272727275	Bacterial LRTI	HAI	Empirical: awaiting culture	No Ventilation	1	1	0	0	0	0	0	0	0	0	0	0	0	0	0	0	0	0
1st PPS/C23H65P19	1st PPS	Western Pacific	C23	H65	Female	4	3.385999917984009	Gentamicin	13.5	mg	1	13.5	3.9870054125806855	Sepsis	HAI	Empirical: awaiting culture	No Ventilation	2	2	2	0	0	0	0	1	0	0	0	0	0	0	0	1	0	0
1st PPS/C23H63P1	1st PPS	Western Pacific	C23	H63	Female	108	39.5	Cefotaxime	2000	mg	4	8000	202.53164556962025	Upper Respiratory Infections (URTI)	CAI	Empirical: pathogen determined	No Ventilation	2	2	0	0	0	0	0	0	0	0	0	0	0	0	0	0	0	0
1st PPS/C23H63P2	1st PPS	Western Pacific	C23	H63	Female	1	1.7999999523162842	Gentamicin	9	mg	1	9	5.00000013245477	Sepsis	HAI	Empirical: pathogen determined	Non-Invasive Ventilation	2	2	1	0	0	0	0	0	0	0	0	0	0	0	0	0	0	1
1st PPS/C23H63P3	1st PPS	Western Pacific	C23	H63	Female	36	16	Ceftriaxone	1200	mg	1	1200	75	Febrile neutropenia/Fever	CAI	Empirical: pathogen determined	No Ventilation	1	1	1	0	0	0	0	0	0	1	0	0	0	0	0	0	0	0
1st PPS/C23H63P4	1st PPS	Western Pacific	C23	H63	Female	1	4.269999980926514	Gentamicin	30	mg	1	30	7.025761155504862	Sepsis	CAI	Empirical: pathogen determined	No Ventilation	2	2	0	0	0	0	0	0	0	0	0	0	0	0	0	0	0	0
1st PPS/C23H63P5	1st PPS	Western Pacific	C23	H63	Male	84	25	Ceftazidime	1250	mg	4	5000	200	Bacterial LRTI	CAI	Targeted	No Ventilation	2	2	1	0	0	0	0	0	0	0	0	0	0	0	0	0	0	1
1st PPS/C23H63P6	1st PPS	Western Pacific	C23	H63	Female	60	16.299999237060547	Cefotaxime	800	mg	4	3200	196.3190275938363	Central Nervous System (CNS) infections	CAI	Empirical: awaiting culture	No Ventilation	2	1	1	0	0	0	0	0	0	0	0	0	1	0	0	0	0	0
1st PPS/C23H62P1	1st PPS	Western Pacific	C23	H62	Male	36	14	Ceftriaxone	700	mg	2	1400	100	Sepsis	CAI	Empirical: pathogen determined	No Ventilation	1	1	1	0	0	0	0	0	0	0	0	0	0	0	0	0	0	1
1st PPS/C23H62P2	1st PPS	Western Pacific	C23	H62	Male	2	4.389999866485596	Gentamicin	32	mg	1	32	7.289294071349831	Sepsis	CAI	Empirical: pathogen determined	No Ventilation	2	2	0	0	0	0	0	0	0	0	0	0	0	0	0	0	0	0
2nd PPS/C23H65P20	2nd PPS	Western Pacific	C23	H65	Male	1	1.1410000324249268	Gentamicin	4.599999904632568	mg	1	4.599999904632568	4.031551072664172	Sepsis	HAI	Empirical: pathogen determined	Non-Invasive Ventilation	3	2	1	0	0	0	0	0	0	0	0	0	0	0	0	1	0	0
2nd PPS/C23H65P21	2nd PPS	Western Pacific	C23	H65	Female	36	16	Metronidazole	120	mg	3	360	22.5	Treatment for Surgical disease	HAI	Empirical: awaiting culture	No Ventilation	2	2	0	0	0	0	0	0	0	0	0	0	0	0	0	0	0	0
2nd PPS/C23H65P22	2nd PPS	Western Pacific	C23	H65	Male	60	24	Ceftazidime	1200	mg	3	3600	150	Bacterial LRTI	CAI	Targeted	No Ventilation	2	2	1	0	0	0	0	0	0	0	0	0	0	0	0	0	0	1
2nd PPS/C23H65P23	2nd PPS	Western Pacific	C23	H65	Female	108	52.400001525878906	Ceftriaxone	1000	mg	1	1000	19.08396890992699	Sepsis	CAI	Empirical: awaiting culture	No Ventilation	1	1	1	0	0	0	0	0	0	0	0	0	0	0	0	0	1	0
2nd PPS/C23H65P24	2nd PPS	Western Pacific	C23	H65	Female	12	7.5	Gentamicin	57	mg	1	57	7.6	CRBSI	HAI	Empirical: pathogen determined	No Ventilation	2	2	1	0	0	0	0	1	0	0	0	0	0	0	0	0	0	0
2nd PPS/C23H65P25	2nd PPS	Western Pacific	C23	H65	Female	12	7.5	Vancomycin	113	mg	4	452	60.266666666666666	CRBSI	HAI	Empirical: pathogen determined	No Ventilation	2	2	1	0	0	0	0	1	0	0	0	0	0	0	0	0	0	0
2nd PPS/C23H65P26	2nd PPS	Western Pacific	C23	H65	Female	11	8	Ceftriaxone	400	mg	2	800	100	Central Nervous System (CNS) infections	CAI	Targeted	No Ventilation	1	1	0	0	0	0	0	0	0	0	0	0	0	0	0	0	0	0
2nd PPS/C23H65P27	2nd PPS	Western Pacific	C23	H65	Female	4	6.699999809265137	Ceftriaxone	310	mg	2	620	92.53731606717795	Central Nervous System (CNS) infections	CAI	Targeted	No Ventilation	1	1	0	0	0	0	0	0	0	0	0	0	0	0	0	0	0	0
2nd PPS/C23H65P28	2nd PPS	Western Pacific	C23	H65	Male	18	12.300000190734863	Ceftriaxone	615	mg	1	615	49.99999922465504	Sepsis	CAI	Empirical: pathogen determined	No Ventilation	3	3	0	0	0	0	0	0	0	0	0	0	0	0	0	0	0	0
2nd PPS/C23H65P29	2nd PPS	Western Pacific	C23	H65	Male	18	12.300000190734863	Clindamycin	120	mg	3	360	29.268292229066365	Sepsis	CAI	Empirical: pathogen determined	No Ventilation	3	3	0	0	0	0	0	0	0	0	0	0	0	0	0	0	0	0
2nd PPS/C23H65P30	2nd PPS	Western Pacific	C23	H65	Female	84	22	Vancomycin	330	mg	4	1320	60	Febrile neutropenia/Fever	CAI	Empirical: pathogen determined	No Ventilation	4	3	1	0	0	0	0	0	1	0	0	0	0	0	0	0	0	0
2nd PPS/C23H65P31	2nd PPS	Western Pacific	C23	H65	Female	84	22	Pip-taz	2200	mg	4	8800	400	Febrile neutropenia/Fever	CAI	Empirical: pathogen determined	No Ventilation	4	3	1	0	0	0	0	0	1	0	0	0	0	0	0	0	0	0
2nd PPS/C23H65P32	2nd PPS	Western Pacific	C23	H65	Male	72	20	Pip-taz	2000	mg	4	8000	400	Febrile neutropenia/Fever	CAI	Empirical: pathogen determined	No Ventilation	1	1	1	0	0	0	0	0	1	0	0	0	0	0	0	0	0	0
2nd PPS/C23H63P7	2nd PPS	Western Pacific	C23	H63	Male	120	28	Ceftazidime	1400	mg	4	5600	200	Bacterial LRTI	CAI	Empirical: awaiting culture	No Ventilation	2	2	1	0	0	0	0	0	0	0	0	0	0	0	0	0	0	1
3rd PPS/C23H65P33	3rd PPS	Western Pacific	C23	H65	Male	1	5.099999904632568	Cefotaxime	250	mg	4	1000	196.078435039117	Central Nervous System (CNS) infections	CAI	Targeted	No Ventilation	2	1	0	0	0	0	0	0	0	0	0	0	0	0	0	0	0	0
3rd PPS/C23H65P34	3rd PPS	Western Pacific	C23	H65	Male	24	13.5	Cefotaxime	675	mg	4	2700	200	Bacterial LRTI	CAI	Empirical: awaiting culture	No Ventilation	3	3	0	0	0	0	0	0	0	0	0	0	0	0	0	0	0	0
3rd PPS/C23H65P35	3rd PPS	Western Pacific	C23	H65	Female	19	11	Ceftriaxone	500	mg	2	1000	90.9090909090909	Central Nervous System (CNS) infections	CAI	Empirical: awaiting culture	No Ventilation	1	1	0	0	0	0	0	0	0	0	0	0	0	0	0	0	0	0
3rd PPS/C23H65P36	3rd PPS	Western Pacific	C23	H65	Female	5	8.5	Gentamicin	60	mg	1	60	7.0588235294117645	Urinary Tract Infections (UTI)	CAI	Targeted	Non-Invasive Ventilation	1	1	0	0	0	0	0	0	0	0	0	0	0	0	0	0	0	0
3rd PPS/C23H65P37	3rd PPS	Western Pacific	C23	H65	Female	16	9	Gentamicin	67.5	mg	1	67.5	7.5	CRBSI	CAI	Empirical: pathogen determined	Non-Invasive Ventilation	2	2	1	0	0	0	0	0	0	0	0	0	0	0	1	0	0	0
3rd PPS/C23H65P38	3rd PPS	Western Pacific	C23	H65	Female	16	9	Vancomycin	135	mg	4	540	60	CRBSI	CAI	Empirical: pathogen determined	Non-Invasive Ventilation	2	2	1	0	0	0	0	0	0	0	0	0	0	0	1	0	0	0
3rd PPS/C23H65P39	3rd PPS	Western Pacific	C23	H65	Male	120	35.900001525878906	Pip-taz	3600	mg	4	14400	401.1141890793404	Febrile neutropenia/Fever	CAI	Empirical: awaiting culture	No Ventilation	3	2	1	0	0	0	0	0	1	0	0	0	0	0	0	0	0	0
3rd PPS/C23H65P40	3rd PPS	Western Pacific	C23	H65	Male	2	1.7899999618530273	Gentamicin	9	mg	1	9	5.027933068044931	Sepsis	HAI	Empirical: awaiting culture	Non-Invasive Ventilation	2	2	1	0	0	0	0	0	0	0	0	0	0	0	0	1	0	0
3rd PPS/C23H65P41	3rd PPS	Western Pacific	C23	H65	Male	24	13.699999809265137	Vancomycin	300	mg	4	1200	87.59124209537983	Central Nervous System (CNS) infections	CAI	Empirical: awaiting culture	No Ventilation	2	2	1	0	0	0	0	0	0	0	0	0	1	0	0	0	0	0
3rd PPS/C23H65P42	3rd PPS	Western Pacific	C23	H65	Male	24	13.699999809265137	Meropenem	274	mg	3	822	60.00000083533518	Central Nervous System (CNS) infections	CAI	Empirical: awaiting culture	No Ventilation	2	2	1	0	0	0	0	0	0	0	0	0	1	0	0	0	0	0
3rd PPS/C23H65P43	3rd PPS	Western Pacific	C23	H65	Male	4	3.3420000076293945	Gentamicin	17.200000762939453	mg	1	17.200000762939453	5.146619007682186	Skin/Soft Tissue Infections (SSTI)	HAI	Empirical: pathogen determined	No Ventilation	2	2	1	0	0	0	0	0	0	0	0	0	0	0	0	1	0	0
3rd PPS/C23H65P44	3rd PPS	Western Pacific	C23	H65	Female	60	20	Ceftriaxone	2000	mg	1	2000	100	Central Nervous System (CNS) infections	CAI	Empirical: pathogen determined	No Ventilation	1	1	0	0	0	0	0	0	0	0	0	0	0	0	0	0	0	0
3rd PPS/C23H65P45	3rd PPS	Western Pacific	C23	H65	Female	36	14	Ceftriaxone	1400	mg	1	1400	100	Sepsis	CAI	Empirical: awaiting culture	No Ventilation	2	2	0	0	0	0	0	0	0	0	0	0	0	0	0	0	0	0
3rd PPS/C23H63P8	3rd PPS	Western Pacific	C23	H63	Female	60	19	Cefotaxime	800	mg	4	3200	168.42105263157896	Unknown	Unknown	Empirical: awaiting culture	No Ventilation	1	1	1	0	0	0	1	0	0	0	0	0	0	0	0	0	0	0
4th PPS/C23H65P46	4th PPS	Western Pacific	C23	H65	Female	36	16.200000762939453	Pip-taz	1600	mg	4	6400	395.06170978961944	Febrile neutropenia/Fever	CAI	Empirical: awaiting culture	No Ventilation	3	3	1	0	0	0	0	0	1	0	0	0	0	0	0	0	0	0
4th PPS/C23H65P47	4th PPS	Western Pacific	C23	H65	Male	2	3.299999952316284	Pip-taz	165	mg	4	660	200.0000028899222	Bacterial LRTI	CAI	Targeted	Invasive Ventilation	1	1	1	0	0	0	0	1	0	0	0	0	0	0	0	0	0	0
4th PPS/C23H65P48	4th PPS	Western Pacific	C23	H65	Male	21	9.300000190734863	Ceftriaxone	450	mg	1	450	48.38709578181655	Bacterial LRTI	CAI	Targeted	No Ventilation	1	1	1	0	0	0	0	0	0	0	0	0	0	0	0	0	0	1
4th PPS/C23H65P49	4th PPS	Western Pacific	C23	H65	Female	36	16.920000076293945	Pip-taz	1700	mg	3	5100	301.41843835718663	Bacterial LRTI	CAI	Targeted	No Ventilation	2	2	1	0	0	0	0	0	0	0	0	0	1	0	0	0	0	0
4th PPS/C23H65P50	4th PPS	Western Pacific	C23	H65	Female	24	12	Clindamycin	200	mg	3	600	50	Bacterial LRTI	CAI	Targeted	No Ventilation	2	2	0	0	0	0	0	0	0	0	0	0	0	0	0	0	0	0
4th PPS/C23H65P51	4th PPS	Western Pacific	C23	H65	Female	24	12	Ceftriaxone	600	mg	1	600	50	Bacterial LRTI	CAI	Targeted	No Ventilation	2	2	0	0	0	0	0	0	0	0	0	0	0	0	0	0	0	0
4th PPS/C23H65P52	4th PPS	Western Pacific	C23	H65	Male	1	2.184000015258789	Pip-taz	220	mg	3	660	302.1978000864595	GI tract infections	HAI	Empirical: awaiting culture	Invasive Ventilation	2	1	1	0	0	0	0	0	0	0	0	0	0	0	0	1	0	0
4th PPS/C23H63P9	4th PPS	Western Pacific	C23	H63	Male	132	64.76749935150147	Vancomycin	1000	mg	4	4000	61.75937067280443	Joint/Bone Infections	CAI	Empirical: no culture	Invasive Ventilation	3	3	0	0	0	0	0	0	0	0	0	0	0	0	0	0	0	0
4th PPS/C23H63P10	4th PPS	Western Pacific	C23	H63	Male	2	4	Gentamicin	27	mg	1	27	6.75	Urinary Tract Infections (UTI)	CAI	Empirical: pathogen determined	No Ventilation	2	2	0	0	0	0	0	0	0	0	0	0	0	0	0	0	0	0
4th PPS/C23H63P11	4th PPS	Western Pacific	C23	H63	Male	2	4	Ampicillin	200	mg	4	800	200	Urinary Tract Infections (UTI)	CAI	Empirical: pathogen determined	No Ventilation	2	2	0	0	0	0	0	0	0	0	0	0	0	0	0	0	0	0
4th PPS/C23H63P12	4th PPS	Western Pacific	C23	H63	Female	96	23	Cefotaxime	1150	mg	3	3450	150	Bacterial LRTI	CAI	Empirical: pathogen determined	No Ventilation	4	3	2	0	0	0	0	0	1	0	0	0	0	0	0	0	0	2
4th PPS/C23H62P3	4th PPS	Western Pacific	C23	H62	Male	24	16	Ceftriaxone	800	mg	2	1600	100	Central Nervous System (CNS) infections	CAI	Empirical: no culture	No Ventilation	2	1	0	0	0	0	0	0	0	0	0	0	0	0	0	0	0	0
Pilot PPS/C7H12P1	Pilot PPS	Americas	C7	H12	Male	3	6.849999904632568	Amikacin	102.75	mg	1	102.75	15.000000208833795	Skin/Soft Tissue Infections (SSTI)	HAI	Empirical: no culture	No Ventilation	2	2	1	0	0	0	0	0	0	0	0	0	1	0	0	0	0	0
Pilot PPS/C7H8P1	Pilot PPS	Americas	C7	H8	Male	12	8.100000381469727	Amikacin	40	mg	3	120	14.81481411711073	Urinary Tract Infections (UTI)	HAI	Empirical: no culture	No Ventilation	4	4	3	0	0	0	0	1	0	0	0	0	0	0	2	0	0	0
Pilot PPS/C7H8P2	Pilot PPS	Americas	C7	H8	Male	12	8.100000381469727	Meropenem	330	mg	3	990	122.22221646616352	Urinary Tract Infections (UTI)	HAI	Empirical: no culture	No Ventilation	4	4	3	0	0	0	0	1	0	0	0	0	0	0	2	0	0	0
Pilot PPS/C7H8P3	Pilot PPS	Americas	C7	H8	Male	12	8.100000381469727	Vancomycin	125	mg	4	500	61.72839215462804	Sepsis	HAI	Empirical: no culture	No Ventilation	4	4	3	0	0	0	0	1	0	0	0	0	0	0	2	0	0	0
Pilot PPS/C7H8P4	Pilot PPS	Americas	C7	H8	Male	84	23	Amikacin	345	mg	1	345	15	Treatment for Surgical disease	CAI	Empirical: no culture	No Ventilation	2	2
Pilot PPS/C7H8P5	Pilot PPS	Americas	C7	H8	Male	84	23	Metronidazole	230	mg	3	690	30	Treatment for Surgical disease	CAI	Empirical: no culture	No Ventilation	2	2
Pilot PPS/C7H8P6	Pilot PPS	Americas	C7	H8	Female	108	30	Amikacin	560	mg	1	560	18.666666666666668	Bacterial LRTI	CAI	Empirical: no culture	No Ventilation	2	2	1	0	0	0	0	0	0	0	0	0	0	0	0	0	0	1
Pilot PPS/C7H8P7	Pilot PPS	Americas	C7	H8	Female	108	30	Meropenem	1200	mg	3	3600	120	Bacterial LRTI	CAI	Empirical: no culture	No Ventilation	2	2	1	0	0	0	0	0	0	0	0	0	0	0	0	0	0	1
Pilot PPS/C7H8P8	Pilot PPS	Americas	C7	H8	Female	36	14.100000381469727	Amikacin	260	mg	1	260	18.439715813177777	Bacterial LRTI	CAI	Empirical: no culture	Non-Invasive Ventilation	2	2	1	0	0	0	0	0	0	0	0	0	0	0	0	0	0	1
Pilot PPS/C7H8P9	Pilot PPS	Americas	C7	H8	Female	36	14.100000381469727	Ceftazidime	850	mg	3	2550	180.85105893693589	Bacterial LRTI	CAI	Empirical: no culture	Non-Invasive Ventilation	2	2	1	0	0	0	0	0	0	0	0	0	0	0	0	0	0	1
Pilot PPS/C7H8P10	Pilot PPS	Americas	C7	H8	Male	36	23	Amikacin	350	mg	1	350	15.217391304347826	Treatment for Surgical disease	HAI	Empirical: no culture	No Ventilation	3	3
Pilot PPS/C7H8P11	Pilot PPS	Americas	C7	H8	Male	36	23	Ampicillin	1000	mg	4	4000	173.91304347826087	Treatment for Surgical disease	HAI	Empirical: no culture	No Ventilation	3	3
Pilot PPS/C7H8P12	Pilot PPS	Americas	C7	H8	Male	36	23	Metronidazole	230	mg	3	690	30	Treatment for Surgical disease	HAI	Empirical: no culture	No Ventilation	3	3
Pilot PPS/C7H12P2	Pilot PPS	Americas	C7	H12	Male	36	14.600000381469727	Co-amoxiclav	1290	mg	3	3870	265.0684862249587	Bacterial LRTI	CAI	Empirical: no culture	No Ventilation	1	1
Pilot PPS/C7H12P3	Pilot PPS	Americas	C7	H12	Male	48	19	Co-amoxiclav	1710	mg	3	5130	270	Bacterial LRTI	CAI	Empirical: no culture	No Ventilation	1	1	1	0	0	0	0	0	0	0	0	0	0	0	1	0	0	0
Pilot PPS/C7H12P4	Pilot PPS	Americas	C7	H12	Female	9	8.300000190734863	Co-amoxiclav	750	mg	3	2250	271.08433111985147	Urinary Tract Infections (UTI)	CAI	Empirical: awaiting culture	No Ventilation	1	1
Pilot PPS/C7H12P5	Pilot PPS	Americas	C7	H12	Male	84	20	Co-amoxiclav	1800	mg	3	5400	270	Urinary Tract Infections (UTI)	CAI	Empirical: awaiting culture	No Ventilation	1	1	1	0	0	0	0	0	0	0	0	0	0	0	1	0	0	0
Pilot PPS/C7H8P13	Pilot PPS	Americas	C7	H8	Male	24	13	Co-amoxiclav	350	mg	3	1050	80.76923076923077	Bacterial LRTI	CAI	Empirical: no culture	No Ventilation	1	1
Pilot PPS/C7H12P6	Pilot PPS	Americas	C7	H12	Female	108	24	Ampicillin	2.5	mg	4	10	0.4166666666666667	Treatment for Surgical disease	CAI	Empirical: awaiting culture	No Ventilation	3	3
Pilot PPS/C7H12P7	Pilot PPS	Americas	C7	H12	Female	108	24	Gentamicin	180	mg	1	180	7.5	Treatment for Surgical disease	CAI	Empirical: awaiting culture	No Ventilation	3	3
Pilot PPS/C7H12P8	Pilot PPS	Americas	C7	H12	Male	1	3.200000047683716	Gentamicin	24.299999237060547	mg	1	24.299999237060547	7.593749648425733	Sepsis	CAI	Empirical: awaiting culture	No Ventilation	2	2
Pilot PPS/C7H12P9	Pilot PPS	Americas	C7	H12	Male	48	20	Gentamicin	120	mg	1	120	6	Treatment for Surgical disease	CAI	Empirical: awaiting culture	No Ventilation	3	3
Pilot PPS/C7H8P14	Pilot PPS	Americas	C7	H8	Male	36	18.5	Ampicillin	900	mg	4	3600	194.59459459459458	Bacterial LRTI	CAI	Empirical: no culture	No Ventilation	1	1	1	0	0	0	0	0	0	0	0	0	1	0	0	0	0	0
Pilot PPS/C7H8P15	Pilot PPS	Americas	C7	H8	Male	17	11	Ampicillin	650	mg	4	2600	236.36363636363637	Bacterial LRTI	CAI	Empirical: no culture	No Ventilation	1	1
Pilot PPS/C7H8P16	Pilot PPS	Americas	C7	H8	Female	60	26	Cefepime	1300	mg	3	3900	150	Skin/Soft Tissue Infections (SSTI)	HAI	Empirical: no culture	No Ventilation	2	2	1	0	0	0	0	0	1	0	0	0	0	0	0	0	0	0
Pilot PPS/C7H8P17	Pilot PPS	Americas	C7	H8	Female	60	26	Vancomycin	260	mg	4	1040	40	Skin/Soft Tissue Infections (SSTI)	HAI	Empirical: no culture	No Ventilation	2	2	1	0	0	0	0	0	1	0	0	0	0	0	0	0	0	0
Pilot PPS/C7H8P18	Pilot PPS	Americas	C7	H8	Male	2	2	Cefepime	100	mg	3	300	150	Central Nervous System (CNS) infections	HAI	Empirical: awaiting culture	No Ventilation	2	2	1	0	0	0	0	0	0	0	0	0	0	0	1	0	0	0
Pilot PPS/C7H8P19	Pilot PPS	Americas	C7	H8	Male	2	2	Teicoplanin	30	mg	4	120	60	Central Nervous System (CNS) infections	HAI	Empirical: awaiting culture	No Ventilation	2	2	1	0	0	0	0	0	0	0	0	0	0	0	1	0	0	0
Pilot PPS/C7H8P20	Pilot PPS	Americas	C7	H8	Male	132	50	Vancomycin	500	mg	4	2000	40	Febrile neutropenia/Fever	HAI	Empirical: no culture	No Ventilation	2	2	1	0	0	0	0	0	1	0	0	0	0	0	0	0	0	0
Pilot PPS/C7H8P21	Pilot PPS	Americas	C7	H8	Male	96	29	Cefepime	1500	mg	2	3000	103.44827586206897	Pyrexia of Unknown Origin (PUO)	CAI	Empirical: awaiting culture	No Ventilation	2	2	1	0	0	0	0	0	1	0	0	0	0	0	0	0	0	0
Pilot PPS/C7H8P22	Pilot PPS	Americas	C7	H8	Female	72	21.5	Cefepime	1000	mg	3	3000	139.53488372093022	Febrile neutropenia/Fever	HAI	Empirical: awaiting culture	No Ventilation	3	2	1	0	0	0	0	0	1	0	0	0	0	0	0	0	0	0
Pilot PPS/C7H12P10	Pilot PPS	Americas	C7	H12	Female	1	9	Cefepime	1350	mg	3	4050	450	Bacterial LRTI	CAI	Empirical: awaiting culture	No Ventilation	2	2	1	0	0	0	0	0	0	0	0	0	1	0	0	0	0	0
Pilot PPS/C7H8P23	Pilot PPS	Americas	C7	H8	Female	1	2	Cefepime	100	mg	3	300	150	Sepsis	CAI	Empirical: no culture	Invasive Ventilation	2	2
Pilot PPS/C7H8P24	Pilot PPS	Americas	C7	H8	Female	72	23	Cefepime	1200	mg	3	3600	156.52173913043478	Febrile neutropenia/Fever	HAI	Empirical: no culture	No Ventilation	2	2	1	0	0	0	0	0	1	0	0	0	0	0	0	0	0	0
Pilot PPS/C7H8P25	Pilot PPS	Americas	C7	H8	Female	72	23	Metronidazole	170	mg	4	680	29.565217391304348	GI tract infections	HAI	Empirical: no culture	No Ventilation	2	2	1	0	0	0	0	0	1	0	0	0	0	0	0	0	0	0
Pilot PPS/C7H8P26	Pilot PPS	Americas	C7	H8	Female	24	10	Ceftazidime	500	mg	3	1500	150	Skin/Soft Tissue Infections (SSTI)	CAI	Empirical: awaiting culture	No Ventilation	2	2
Pilot PPS/C7H8P27	Pilot PPS	Americas	C7	H8	Female	24	10	Clindamycin	100	mg	4	400	40	Skin/Soft Tissue Infections (SSTI)	CAI	Empirical: awaiting culture	No Ventilation	2	2
Pilot PPS/C7H8P28	Pilot PPS	Americas	C7	H8	Female	24	10.199999809265137	Ceftazidime	430	mg	3	1290	126.47059060023047	Sepsis	HAI	Targeted	No Ventilation	1	1	1	0	0	0	0	0	0	0	0	0	0	0	1	0	0	0
Pilot PPS/C7H13P1	Pilot PPS	Americas	C7	H13	Female	11	12	Ceftazidime	600	mg	3	1800	150	Central Nervous System (CNS) infections	HAI	Empirical: no culture	No Ventilation	2	2	2	0	0	0	0	0	0	0	0	0	1	0	1	0	0	0
Pilot PPS/C7H13P2	Pilot PPS	Americas	C7	H13	Female	11	12	Vancomycin	180	mg	4	720	60	Central Nervous System (CNS) infections	HAI	Empirical: no culture	No Ventilation	2	2	2	0	0	0	0	0	0	0	0	0	1	0	1	0	0	0
Pilot PPS/C7H8P29	Pilot PPS	Americas	C7	H8	Male	24	12.300000190734863	Ceftriaxone	310	mg	2	620	50.40650328339207	Urinary Tract Infections (UTI)	CAI	Empirical: no culture	No Ventilation	1	1
Pilot PPS/C7H8P30	Pilot PPS	Americas	C7	H8	Female	13	5.199999809265137	Ceftriaxone	150	mg	2	300	57.692309808449004	Bacterial LRTI	CAI	Empirical: no culture	No Ventilation	2	2	1	0	0	0	0	0	0	0	0	0	1	0	0	0	0	0
Pilot PPS/C7H8P31	Pilot PPS	Americas	C7	H8	Female	24	13.600000381469727	Ceftriaxone	350	mg	2	700	51.47058679158304	Bacterial LRTI	CAI	Empirical: no culture	No Ventilation	1	1
Pilot PPS/C7H8P32	Pilot PPS	Americas	C7	H8	Male	7	7.5	Ceftriaxone	200	mg	2	400	53.333333333333336	Pyrexia of Unknown Origin (PUO)	CAI	Empirical: awaiting culture	No Ventilation	1	1	1	0	0	0	0	0	1	0	0	0	0	0	0	0	0	0
Pilot PPS/C7H8P33	Pilot PPS	Americas	C7	H8	Male	12	8.699999809265137	Ceftriaxone	250	mg	2	500	57.47126562779012	Bacterial LRTI	CAI	Empirical: no culture	Invasive Ventilation	3	2	1	0	0	0	0	0	0	0	0	0	0	0	1	0	0	0
Pilot PPS/C7H8P34	Pilot PPS	Americas	C7	H8	Female	19	10	Ceftriaxone	250	mg	2	500	50	Bacterial LRTI	CAI	Empirical: no culture	No Ventilation	1	1	1	0	0	0	0	0	1	0	0	0	0	0	0	0	0	0
Pilot PPS/C7H8P35	Pilot PPS	Americas	C7	H8	Female	2	4.599999904632568	Ceftriaxone	230	mg	2	460	100.00000207320508	Bacterial LRTI	CAI	Empirical: no culture	Non-Invasive Ventilation	1	1
Pilot PPS/C7H8P36	Pilot PPS	Americas	C7	H8	Female	6	5.400000095367432	Ceftriaxone	150	mg	2	300	55.55555457440916	Bacterial LRTI	CAI	Empirical: no culture	Invasive Ventilation	1	1	2	0	0	0	0	0	0	0	0	0	1	0	1	0	0	0
Pilot PPS/C7H8P37	Pilot PPS	Americas	C7	H8	Female	60	20	Ceftriaxone	500	mg	2	1000	50	Urinary Tract Infections (UTI)	CAI	Empirical: pathogen determined	No Ventilation	1	1
Pilot PPS/C7H8P38	Pilot PPS	Americas	C7	H8	Female	7	8	Ceftriaxone	400	mg	2	800	100	Bacterial LRTI	CAI	Empirical: no culture	Invasive Ventilation	2	1
Pilot PPS/C7H12P11	Pilot PPS	Americas	C7	H12	Male	60	27.200000762939453	Ceftriaxone	2600	mg	2	5200	191.17646522587987	Central Nervous System (CNS) infections	CAI	Empirical: awaiting culture	No Ventilation	2	2	1	0	0	0	0	0	0	0	0	0	0	0	1	0	0	0
Pilot PPS/C7H12P12	Pilot PPS	Americas	C7	H12	Male	4	8	Ceftriaxone	800	mg	2	1600	200	Central Nervous System (CNS) infections	CAI	Empirical: awaiting culture	No Ventilation	1	1
Pilot PPS/C7H8P39	Pilot PPS	Americas	C7	H8	Female	60	26	Ceftriaxone	650	mg	2	1300	50	Pyrexia of Unknown Origin (PUO)	CAI	Empirical: no culture	No Ventilation	2	2	1	0	0	0	0	0	1	0	0	0	0	0	0	0	0	0
Pilot PPS/C7H8P40	Pilot PPS	Americas	C7	H8	Female	60	26	Teicoplanin	260	mg	4	1040	40	Skin/Soft Tissue Infections (SSTI)	Unknown	Empirical: awaiting culture	No Ventilation	2	2	1	0	0	0	0	0	1	0	0	0	0	0	0	0	0	0
Pilot PPS/C7H8P41	Pilot PPS	Americas	C7	H8	Male	12	10	Ceftriaxone	250	mg	2	500	50	Bacterial LRTI	CAI	Empirical: no culture	No Ventilation	1	1
Pilot PPS/C7H8P42	Pilot PPS	Americas	C7	H8	Female	13	8.699999809265137	Ceftriaxone	250	mg	2	500	57.47126562779012	Bacterial LRTI	CAI	Empirical: no culture	No Ventilation	2	2
Pilot PPS/C7H8P43	Pilot PPS	Americas	C7	H8	Female	2	6	Ceftriaxone	250	mg	2	500	83.33333333333333	Sepsis	HAI	Empirical: awaiting culture	Invasive Ventilation	2	1	1	0	0	0	0	0	1	0	0	0	0	0	0	0	0	0
Pilot PPS/C7H8P44	Pilot PPS	Americas	C7	H8	Female	132	28.899999618530273	Ceftriaxone	725	mg	2	1450	50.173011042888746	Bacterial LRTI	CAI	Empirical: awaiting culture	No Ventilation	1	1	1	0	0	0	0	0	1	0	0	0	0	0	0	0	0	0
Pilot PPS/C7H8P45	Pilot PPS	Americas	C7	H8	Male	48	20.700000762939453	Ceftriaxone	500	mg	2	1000	48.309176963431064	Bacterial LRTI	CAI	Empirical: no culture	No Ventilation	1	1	1	0	0	0	0	0	1	0	0	0	0	0	0	0	0	0
Pilot PPS/C7H8P46	Pilot PPS	Americas	C7	H8	Male	1	3.200000047683716	Ceftriaxone	160	mg	2	320	99.99999850988391	Bacterial LRTI	CAI	Empirical: no culture	Invasive Ventilation	1	1	1	0	0	0	0	0	0	0	0	0	0	0	1	0	0	0
Pilot PPS/C7H8P47	Pilot PPS	Americas	C7	H8	Male	36	17	Ceftriaxone	860	mg	1	860	50.588235294117645	Bacterial LRTI	CAI	Empirical: no culture	Non-Invasive Ventilation	1	1	2	0	0	0	0	0	0	0	0	0	1	0	0	0	0	1
Pilot PPS/C7H8P48	Pilot PPS	Americas	C7	H8	Female	24	9.699999809265137	Ceftriaxone	250	mg	2	500	51.546392766154035	Bacterial LRTI	CAI	Empirical: no culture	No Ventilation	2	2	2	0	0	0	0	0	0	0	0	0	1	0	1	0	0	0
Pilot PPS/C7H8P49	Pilot PPS	Americas	C7	H8	Female	24	9.699999809265137	Clindamycin	130	mg	3	390	40.20618635760015	Bacterial LRTI	CAI	Empirical: no culture	No Ventilation	2	2	2	0	0	0	0	0	0	0	0	0	1	0	1	0	0	0
Pilot PPS/C7H8P50	Pilot PPS	Americas	C7	H8	Female	4	3.5999999046325684	Ceftriaxone	200	mg	4	800	222.22222810910088	Bacterial LRTI	CAI	Empirical: awaiting culture	Invasive Ventilation	2	2	2	0	0	0	0	0	0	0	0	0	0	0	1	0	0	1
Pilot PPS/C7H8P51	Pilot PPS	Americas	C7	H8	Male	1	4.599999904632568	Ceftriaxone	120	mg	2	240	52.173914125150475	Urinary Tract Infections (UTI)	HAI	Empirical: pathogen determined	No Ventilation	1	1
Pilot PPS/C7H8P52	Pilot PPS	Americas	C7	H8	Female	11	9.300000190734863	Ceftriaxone	250	mg	2	500	53.76343975757394	Pyrexia of Unknown Origin (PUO)	CAI	Empirical: no culture	No Ventilation	1	1	1	0	0	0	0	0	1	0	0	0	0	0	0	0	0	0
Pilot PPS/C7H12P13	Pilot PPS	Americas	C7	H12	Female	5	7	Ceftriaxone	700	mg	2	1400	200	Central Nervous System (CNS) infections	CAI	Empirical: awaiting culture	No Ventilation	2	1
Pilot PPS/C7H8P53	Pilot PPS	Americas	C7	H8	Female	60	20	Clindamycin	200	mg	4	800	40	Lymphadenitis	CAI	Empirical: awaiting culture	No Ventilation	2	2
Pilot PPS/C7H8P54	Pilot PPS	Americas	C7	H8	Female	9	6.5	Ceftriaxone	175	mg	2	350	53.84615384615385	Pyrexia of Unknown Origin (PUO)	CAI	Empirical: no culture	No Ventilation	1	1	1	0	0	0	0	0	1	0	0	0	0	0	0	0	0	0
Pilot PPS/C7H8P55	Pilot PPS	Americas	C7	H8	Male	24	17	Ceftriaxone	450	mg	2	900	52.94117647058823	Bacterial LRTI	CAI	Empirical: no culture	No Ventilation	2	2	1	0	0	0	0	0	0	0	0	0	0	0	0	0	0	1
Pilot PPS/C7H8P56	Pilot PPS	Americas	C7	H8	Male	24	17	Clindamycin	170	mg	4	680	40	Bacterial LRTI	CAI	Empirical: no culture	No Ventilation	2	2	1	0	0	0	0	0	0	0	0	0	0	0	0	0	0	1
Pilot PPS/C7H8P57	Pilot PPS	Americas	C7	H8	Male	3	5.5	Ceftriaxone	140	mg	2	280	50.90909090909091	Bacterial LRTI	CAI	Empirical: no culture	Invasive Ventilation	2	1	1	0	0	1	0	0	0	0	0	0	0	0	0	0	0	0
Pilot PPS/C7H12P14	Pilot PPS	Americas	C7	H12	Female	24	12	Gentamicin	90	mg	2	180	15	Urinary Tract Infections (UTI)	CAI	Empirical: awaiting culture	Non-Invasive Ventilation	2	2	2	0	0	0	0	0	0	0	0	0	1	0	1	0	0	0
Pilot PPS/C7H8P58	Pilot PPS	Americas	C7	H8	Male	12	5.699999809265137	Meropenem	225	mg	3	675	118.42105659421475	Bacterial LRTI	HAI	Empirical: no culture	Invasive Ventilation	2	2	3	0	0	0	0	1	0	0	0	0	1	0	0	0	0	1
Pilot PPS/C7H8P59	Pilot PPS	Americas	C7	H8	Male	12	5.699999809265137	Vancomycin	85	mg	4	340	59.64912480301187	Bacterial LRTI	HAI	Empirical: no culture	Invasive Ventilation	2	2	3	0	0	0	0	1	0	0	0	0	1	0	0	0	0	1
Pilot PPS/C7H8P60	Pilot PPS	Americas	C7	H8	Male	72	17	Meropenem	680	mg	3	2040	120	Sepsis	Unknown	Empirical: no culture	No Ventilation	3	3	1	0	0	0	0	1	0	0	0	0	0	0	0	0	0	0
Pilot PPS/C7H8P61	Pilot PPS	Americas	C7	H8	Male	72	17	Vancomycin	255	mg	4	1020	60	Sepsis	Unknown	Empirical: no culture	No Ventilation	3	3	1	0	0	0	0	1	0	0	0	0	0	0	0	0	0	0
Pilot PPS/C7H8P62	Pilot PPS	Americas	C7	H8	Female	12	9	Meropenem	360	mg	3	1080	120	Sepsis	CAI	Empirical: no culture	Invasive Ventilation	4	4	1	0	0	0	0	0	0	0	0	0	1	0	0	0	0	0
Pilot PPS/C7H8P63	Pilot PPS	Americas	C7	H8	Female	12	9	Vancomycin	135	mg	4	540	60	Sepsis	CAI	Empirical: no culture	Invasive Ventilation	4	4	1	0	0	0	0	0	0	0	0	0	1	0	0	0	0	0
Pilot PPS/C7H8P64	Pilot PPS	Americas	C7	H8	Male	5	8	Meropenem	160	mg	3	480	60	Bacterial LRTI	CAI	Empirical: no culture	Invasive Ventilation	3	3
Pilot PPS/C7H8P65	Pilot PPS	Americas	C7	H8	Male	5	8	Vancomycin	80	mg	4	320	40	Bacterial LRTI	CAI	Empirical: no culture	Invasive Ventilation	3	3
Pilot PPS/C7H8P66	Pilot PPS	Americas	C7	H8	Male	12	7.5	Meropenem	180	mg	3	540	72	Bacterial LRTI	HAI	Empirical: no culture	No Ventilation	2	2	1	0	0	0	0	0	0	0	0	0	0	0	0	0	0	1
Pilot PPS/C7H8P67	Pilot PPS	Americas	C7	H8	Male	12	7.5	Vancomycin	90	mg	4	360	48	Bacterial LRTI	HAI	Empirical: no culture	No Ventilation	2	2	1	0	0	0	0	0	0	0	0	0	0	0	0	0	0	1
1st PPS/C7H12P15	1st PPS	Americas	C7	H12	Female	96	25	Vancomycin	250	mg	4	1000	40	Febrile neutropenia/Fever	CAI	Empirical: pathogen determined	No Ventilation	5	3	1	0	0	0	0	0	0	1	0	0	0	0	0	0	0	0
1st PPS/C7H12P16	1st PPS	Americas	C7	H12	Female	96	25	Meropenem	500	mg	3	1500	60	Febrile neutropenia/Fever	CAI	Empirical: pathogen determined	No Ventilation	5	3	1	0	0	0	0	0	0	1	0	0	0	0	0	0	0	0
1st PPS/C7H12P17	1st PPS	Americas	C7	H12	Female	24	11.5	Co-amoxiclav	345	mg	3	1035	90	Bacterial LRTI	CAI	Empirical: awaiting culture	No Ventilation	1	1	0	0	0	0	0	0	0	0	0	0	0	0	0	0	0	0
1st PPS/C7H12P18	1st PPS	Americas	C7	H12	Female	72	33	Co-amoxiclav	500	mg	3	1500	45.45454545454545	GI tract infections	CAI	Empirical: pathogen determined	No Ventilation	1	1	0	0	0	0	0	0	0	0	0	0	0	0	0	0	0	0
1st PPS/C7H12P19	1st PPS	Americas	C7	H12	Female	60	18	Cefepime	600	mg	3	1800	100	Febrile neutropenia/Fever	CAI	Empirical: pathogen determined	No Ventilation	1	1	1	0	0	0	0	0	0	1	0	0	0	0	0	0	0	0
1st PPS/C7H12P20	1st PPS	Americas	C7	H12	Female	7	8.5	Co-amoxiclav	255	mg	3	765	90	Viral LRTI	CAI	Empirical: awaiting culture	No Ventilation	1	1	0	0	0	0	0	0	0	0	0	0	0	0	0	0	0	0
1st PPS/C7H12P21	1st PPS	Americas	C7	H12	Male	15	10	Cefuroxime	500	mg	3	1500	150	Bacterial LRTI	CAI	Empirical: awaiting culture	No Ventilation	1	1	0	0	0	0	0	0	0	0	0	0	0	0	0	0	0	0
1st PPS/C7H12P22	1st PPS	Americas	C7	H12	Male	72	36	Co-amoxiclav	720	mg	3	2160	60	Bacterial LRTI	CAI	Empirical: awaiting culture	No Ventilation	1	1	0	0	0	0	0	0	0	0	0	0	0	0	0	0	0	0
1st PPS/C7H12P23	1st PPS	Americas	C7	H12	Male	120	33	Gentamicin	77	mg	3	231	7	GI tract infections	CAI	Empirical: pathogen determined	No Ventilation	3	3	0	0	0	0	0	0	0	0	0	0	0	0	0	0	0	0
1st PPS/C7H12P24	1st PPS	Americas	C7	H12	Male	120	33	Metronidazole	330	mg	3	990	30	GI tract infections	CAI	Empirical: pathogen determined	No Ventilation	3	3	0	0	0	0	0	0	0	0	0	0	0	0	0	0	0	0
1st PPS/C7H12P25	1st PPS	Americas	C7	H12	Male	120	33	Ampicillin	825	mg	3	2475	75	GI tract infections	CAI	Empirical: pathogen determined	No Ventilation	3	3	0	0	0	0	0	0	0	0	0	0	0	0	0	0	0	0
1st PPS/C7H12P26	1st PPS	Americas	C7	H12	Male	60	18	Clindamycin	180	mg	4	720	40	Joint/Bone Infections	CAI	Targeted	No Ventilation	1	1	0	0	0	0	0	0	0	0	0	0	0	0	0	0	0	0
1st PPS/C7H12P27	1st PPS	Americas	C7	H12	Male	16	14.600000381469727	Clindamycin	146	mg	4	584	39.99999895487749	Joint/Bone Infections	CAI	Empirical: pathogen determined	No Ventilation	1	1	0	0	0	0	0	0	0	0	0	0	0	0	0	0	0	0
1st PPS/C7H12P28	1st PPS	Americas	C7	H12	Male	48	15	Co-amoxiclav	250	mg	3	750	50	Upper Respiratory Infections (URTI)	CAI	Empirical: awaiting culture	No Ventilation	1	1	0	0	0	0	0	0	0	0	0	0	0	0	0	0	0	0
1st PPS/C7H12P29	1st PPS	Americas	C7	H12	Female	16	11	Co-amoxiclav	330	mg	3	990	90	Bacterial LRTI	CAI	Empirical: awaiting culture	No Ventilation	1	1	0	0	0	0	0	0	0	0	0	0	0	0	0	0	0	0
1st PPS/C7H12P30	1st PPS	Americas	C7	H12	Male	4	5	Amikacin	75	mg	1	75	15	Urinary Tract Infections (UTI)	CAI	Targeted	Invasive Ventilation	2	2	0	0	0	0	0	0	0	0	0	0	0	0	0	0	0	0
1st PPS/C7H12P31	1st PPS	Americas	C7	H12	Male	4	5	Meropenem	200	mg	3	600	120	Urinary Tract Infections (UTI)	CAI	Targeted	Invasive Ventilation	2	2	0	0	0	0	0	0	0	0	0	0	0	0	0	0	0	0
1st PPS/C7H12P32	1st PPS	Americas	C7	H12	Male	84	20	Cefepime	1000	mg	3	3000	150	Bacterial LRTI	CAI	Empirical: pathogen determined	No Ventilation	1	1	1	0	0	0	0	0	1	0	0	0	0	0	0	0	0	0
1st PPS/C7H12P33	1st PPS	Americas	C7	H12	Male	5	8	Co-amoxiclav	160	mg	3	480	60	Bacterial LRTI	CAI	Empirical: awaiting culture	No Ventilation	1	1	0	0	0	0	0	0	0	0	0	0	0	0	0	0	0	0
1st PPS/C7H12P34	1st PPS	Americas	C7	H12	Female	36	13	Pip-taz	1300	mg	4	5200	400	Bacterial LRTI	HAI	Empirical: pathogen determined	No Ventilation	2	2	1	0	0	0	0	0	0	1	0	0	0	0	0	0	0	0
1st PPS/C7H12P35	1st PPS	Americas	C7	H12	Male	60	20	Co-amoxiclav	333	mg	3	999	49.95	Upper Respiratory Infections (URTI)	CAI	Empirical: awaiting culture	No Ventilation	1	1	0	0	0	0	0	0	0	0	0	0	0	0	0	0	0	0
1st PPS/C7H12P36	1st PPS	Americas	C7	H12	Female	84	33	Co-amoxiclav	1000	mg	3	3000	90.9090909090909	Other	CAI	Empirical: awaiting culture	No Ventilation	1	1	0	0	0	0	0	0	0	0	0	0	0	0	0	0	0	0
1st PPS/C7H10P1	1st PPS	Americas	C7	H10	Male	120	28	Amikacin	855	mg	1	855	30.535714285714285	Bacterial LRTI	CAI	Targeted	No Ventilation	3	3	1	0	0	0	0	0	0	0	0	0	0	0	0	0	0	1
1st PPS/C7H10P2	1st PPS	Americas	C7	H10	Male	120	28	Ceftazidime	2000	mg	3	6000	214.28571428571428	Bacterial LRTI	CAI	Targeted	No Ventilation	3	3	1	0	0	0	0	0	0	0	0	0	0	0	0	0	0	1
1st PPS/C7H10P3	1st PPS	Americas	C7	H10	Male	72	20	Vancomycin	300	mg	1	300	15	Other	HAI	Targeted	No Ventilation	1	1	1	1	0	0	0	0	0	0	0	0	0	0	0	0	1	0
1st PPS/C7H10P4	1st PPS	Americas	C7	H10	Female	21	9	Vancomycin	135	mg	4	540	60	CRBSI	HAI	Empirical: pathogen determined	No Ventilation	2	2	1	0	0	1	0	0	0	0	0	0	0	0	0	0	0	0
1st PPS/C7H10P5	1st PPS	Americas	C7	H10	Female	21	9	Cefepime	450	mg	3	1350	150	CRBSI	HAI	Empirical: pathogen determined	No Ventilation	2	2	1	0	0	1	0	0	0	0	0	0	0	0	0	0	0	0
1st PPS/C7H10P6	1st PPS	Americas	C7	H10	Male	24	10	Co-amoxiclav	170	mg	3	510	51	Unknown	CAI	Empirical: awaiting culture	No Ventilation	1	1	2	0	0	1	0	1	0	0	0	0	0	0	0	0	0	0
1st PPS/C7H10P7	1st PPS	Americas	C7	H10	Male	24	6	Vancomycin	90	mg	1	90	15	CRBSI	HAI	Empirical: pathogen determined	No Ventilation	1	1	2	1	0	0	0	1	0	0	0	0	0	0	0	0	1	0
1st PPS/C7H10P8	1st PPS	Americas	C7	H10	Male	12	7	Clindamycin	100	mg	3	300	42.857142857142854	Skin/Soft Tissue Infections (SSTI)	CAI	Empirical: pathogen determined	No Ventilation	1	1	1	0	0	1	0	0	0	0	0	0	0	0	0	0	0	0
1st PPS/C7H8P68	1st PPS	Americas	C7	H8	Female	12	3.5	Vancomycin	30	mg	4	120	34.285714285714285	Central Nervous System (CNS) infections	CAI	Empirical: awaiting culture	No Ventilation	2	2	3	0	0	1	0	0	0	0	0	0	1	1	0	0	0	0
1st PPS/C7H8P69	1st PPS	Americas	C7	H8	Female	12	3.5	Ceftriaxone	160	mg	2	320	91.42857142857143	Central Nervous System (CNS) infections	CAI	Empirical: awaiting culture	No Ventilation	2	2	3	0	0	1	0	0	0	0	0	0	1	1	0	0	0	0
1st PPS/C7H8P70	1st PPS	Americas	C7	H8	Male	3	3.799999952316284	Meropenem	150	mg	3	450	118.42105411756734	Sepsis	HAI	Targeted	No Ventilation	2	2	1	1	0	0	0	0	0	0	0	0	0	0	0	0	1	0
1st PPS/C7H8P71	1st PPS	Americas	C7	H8	Male	36	15.300000190734863	Ampicillin	800	mg	4	3200	209.15032419004845	Other	CAI	Empirical: awaiting culture	No Ventilation	1	1	0	0	0	0	0	0	0	0	0	0	0	0	0	0	0	0
1st PPS/C7H8P72	1st PPS	Americas	C7	H8	Female	3	3.4000000953674316	Ceftriaxone	85	mg	2	170	49.99999859753781	GI tract infections	CAI	Empirical: awaiting culture	No Ventilation	1	1	1	0	0	1	0	0	0	0	0	0	0	0	0	0	0	0
1st PPS/C7H8P73	1st PPS	Americas	C7	H8	Male	5	5.099999904632568	Gentamicin	38	mg	1	38	7.450980531486446	Sepsis	HAI	Targeted	No Ventilation	2	2	2	0	0	1	0	0	0	0	0	0	0	1	0	0	0	0
1st PPS/C7H8P74	1st PPS	Americas	C7	H8	Male	5	5.099999904632568	Ampicillin	250	mg	4	1000	196.078435039117	Sepsis	HAI	Targeted	No Ventilation	2	2	2	0	0	1	0	0	0	0	0	0	0	1	0	0	0	0
1st PPS/C7H8P75	1st PPS	Americas	C7	H8	Female	22	12	Ceftriaxone	320	mg	2	640	53.333333333333336	Urinary Tract Infections (UTI)	CAI	Empirical: awaiting culture	No Ventilation	1	1	0	0	0	0	0	0	0	0	0	0	0	0	0	0	0	0
1st PPS/C7H8P76	1st PPS	Americas	C7	H8	Female	120	33	Ceftazidime	2000	mg	3	6000	181.8181818181818	Other	HAI	Empirical: awaiting culture	No Ventilation	2	2	1	0	0	0	0	0	0	0	0	0	0	0	0	0	0	1
1st PPS/C7H8P77	1st PPS	Americas	C7	H8	Female	120	33	Meropenem	1300	mg	3	3900	118.18181818181819	Other	CAI	Empirical: awaiting culture	No Ventilation	2	2	1	0	0	0	0	0	0	0	0	0	0	0	0	0	0	1
1st PPS/C7H8P78	1st PPS	Americas	C7	H8	Male	132	30	Clindamycin	300	mg	4	1200	40	Other	CAI	Targeted	Non-Invasive Ventilation	2	1	1	0	0	0	0	0	0	0	0	0	0	0	0	0	0	1
1st PPS/C7H8P79	1st PPS	Americas	C7	H8	Female	84	22	Metronidazole	220	mg	3	660	30	GI tract infections	HAI	Empirical: awaiting culture	No Ventilation	2	2	0	0	0	0	0	0	0	0	0	0	0	0	0	0	0	0
1st PPS/C7H8P80	1st PPS	Americas	C7	H8	Female	84	22	Gentamicin	55	mg	3	165	7.5	Urinary Tract Infections (UTI)	HAI	Empirical: awaiting culture	No Ventilation	2	2	0	0	0	0	0	0	0	0	0	0	0	0	0	0	0	0
1st PPS/C7H8P81	1st PPS	Americas	C7	H8	Male	72	20	Clindamycin	200	mg	4	800	40	Upper Respiratory Infections (URTI)	CAI	Empirical: awaiting culture	No Ventilation	2	2	2	0	0	1	0	0	0	0	0	0	0	1	0	0	0	0
1st PPS/C7H8P82	1st PPS	Americas	C7	H8	Male	3	4	Vancomycin	35	mg	4	140	35	Upper Respiratory Infections (URTI)	HAI	Empirical: awaiting culture	Invasive Ventilation	2	2	1	0	0	0	0	0	0	0	0	0	0	0	0	0	0	1
1st PPS/C7H8P83	1st PPS	Americas	C7	H8	Male	3	4	Cefepime	190	mg	2	380	95	Upper Respiratory Infections (URTI)	HAI	Empirical: awaiting culture	Invasive Ventilation	2	2	1	0	0	0	0	0	0	0	0	0	0	0	0	0	0	1
1st PPS/C7H8P84	1st PPS	Americas	C7	H8	Female	108	36	Ceftriaxone	900	mg	2	1800	50	Urinary Tract Infections (UTI)	CAI	Empirical: awaiting culture	No Ventilation	1	1	1	1	0	0	0	0	0	0	0	0	0	0	0	0	1	0
1st PPS/C7H8P85	1st PPS	Americas	C7	H8	Male	9	11	Meropenem	400	mg	3	1200	109.0909090909091	Urinary Tract Infections (UTI)	HAI	Targeted	Invasive Ventilation	3	3	1	0	0	0	0	0	0	0	0	0	1	0	0	0	0	0
1st PPS/C7H8P86	1st PPS	Americas	C7	H8	Male	9	11	Vancomycin	150	mg	4	600	54.54545454545455	Sepsis	HAI	Targeted	Invasive Ventilation	3	3	1	0	0	0	0	0	0	0	0	0	1	0	0	0	0	0
1st PPS/C7H8P87	1st PPS	Americas	C7	H8	Male	9	11	Gentamicin	100	mg	1	100	9.090909090909092	Urinary Tract Infections (UTI)	HAI	Targeted	Invasive Ventilation	3	3	1	0	0	0	0	0	0	0	0	0	1	0	0	0	0	0
1st PPS/C7H8P88	1st PPS	Americas	C7	H8	Female	12	7	Meropenem	280	mg	3	840	120	Other	HAI	Empirical: awaiting culture	Invasive Ventilation	2	2	1	0	0	0	0	0	0	0	0	0	0	1	0	0	0	0
1st PPS/C7H8P89	1st PPS	Americas	C7	H8	Female	12	7	Vancomycin	105	mg	4	420	60	Other	HAI	Empirical: awaiting culture	Invasive Ventilation	2	2	1	0	0	0	0	0	0	0	0	0	0	1	0	0	0	0
1st PPS/C7H8P90	1st PPS	Americas	C7	H8	Male	1	3	Meropenem	60	mg	3	180	60	Treatment for Surgical disease	CAI	Empirical: awaiting culture	Invasive Ventilation	2	2	1	0	0	1	0	0	0	0	0	0	0	0	0	0	0	0
1st PPS/C7H8P91	1st PPS	Americas	C7	H8	Male	1	3	Teicoplanin	24	mg	1	24	8	Treatment for Surgical disease	CAI	Empirical: awaiting culture	Invasive Ventilation	2	2	1	0	0	1	0	0	0	0	0	0	0	0	0	0	0	0
1st PPS/C7H8P92	1st PPS	Americas	C7	H8	Female	36	13	Clindamycin	130	mg	4	520	40	Upper Respiratory Infections (URTI)	CAI	Empirical: awaiting culture	No Ventilation	2	2	1	0	0	0	0	0	0	0	0	0	0	0	1	0	0	0
1st PPS/C7H8P93	1st PPS	Americas	C7	H8	Female	36	13	Ceftriaxone	650	mg	2	1300	100	Upper Respiratory Infections (URTI)	CAI	Empirical: awaiting culture	No Ventilation	2	2	1	0	0	0	0	0	0	0	0	0	0	0	1	0	0	0
1st PPS/C7H8P94	1st PPS	Americas	C7	H8	Male	1	10	Meropenem	360	mg	3	1080	108	Central Nervous System (CNS) infections	CAI	Empirical: awaiting culture	Invasive Ventilation	2	2	0	0	0	0	0	0	0	0	0	0	0	0	0	0	0	0
1st PPS/C7H8P95	1st PPS	Americas	C7	H8	Male	1	10	Vancomycin	140	mg	4	560	56	Central Nervous System (CNS) infections	CAI	Empirical: awaiting culture	Invasive Ventilation	2	2	0	0	0	0	0	0	0	0	0	0	0	0	0	0	0	0
1st PPS/C7H8P96	1st PPS	Americas	C7	H8	Female	132	21	Ceftriaxone	500	mg	2	1000	47.61904761904762	Upper Respiratory Infections (URTI)	CAI	Empirical: awaiting culture	No Ventilation	1	1	1	0	0	0	0	0	0	0	0	0	1	0	0	0	0	0
1st PPS/C7H8P97	1st PPS	Americas	C7	H8	Female	84	15	Ceftriaxone	600	mg	2	1200	80	Upper Respiratory Infections (URTI)	CAI	Empirical: awaiting culture	No Ventilation	5	2	2	0	0	0	0	1	0	0	0	0	0	0	1	0	0	0
1st PPS/C7H8P98	1st PPS	Americas	C7	H8	Male	11	10.5	Meropenem	210	mg	3	630	60	Sepsis	HAI	Empirical: awaiting culture	No Ventilation	4	3	1	0	0	0	0	0	1	0	0	0	0	0	0	0	0	0
1st PPS/C7H11P1	1st PPS	Americas	C7	H11	Female	18	7.800000190734863	Pip-taz	585	mg	4	2340	299.9999926640439	Bacterial LRTI	CAI	Empirical: pathogen determined	No Ventilation	4	3	2	0	0	0	0	0	1	0	0	0	0	0	1	0	0	0
1st PPS/C7H11P2	1st PPS	Americas	C7	H11	Female	18	7.800000190734863	Vancomycin	120	mg	4	480	61.53846003365003	Bacterial LRTI	CAI	Empirical: pathogen determined	No Ventilation	4	3	2	0	0	0	0	0	1	0	0	0	0	0	1	0	0	0
1st PPS/C7H11P3	1st PPS	Americas	C7	H11	Male	7	10.800000190734863	Ceftriaxone	500	mg	2	1000	92.59259095734859	Bacterial LRTI	HAI	Empirical: awaiting culture	No Ventilation	3	2	0	0	0	0	0	0	0	0	0	0	0	0	0	0	0	0
1st PPS/C7H11P4	1st PPS	Americas	C7	H11	Male	23	6.400000095367432	Ceftriaxone	600	mg	1	600	93.74999860301615	Urinary Tract Infections (UTI)	HAI	Targeted	No Ventilation	1	1	1	0	0	0	0	0	0	0	1	0	0	0	0	0	0	0
1st PPS/C7H11P5	1st PPS	Americas	C7	H11	Male	9	8.199999809265137	Ciprofloxacin	120	mg	2	240	29.268293363717554	CRBSI	HAI	Targeted	No Ventilation	2	2	3	0	0	1	0	0	0	0	0	0	2	1	0	0	0	0
1st PPS/C7H11P6	1st PPS	Americas	C7	H11	Male	9	4.800000190734863	Ceftriaxone	250	mg	2	500	104.16666252745539	Sepsis	HAI	Targeted	No Ventilation	2	2	2	0	0	0	0	1	0	0	1	0	0	0	0	0	0	0
1st PPS/C7H11P7	1st PPS	Americas	C7	H11	Female	20	5.599999904632568	Vancomycin	85	mg	4	340	60.71428674824386	Sepsis	HAI	Empirical: pathogen determined	No Ventilation	1	1	2	0	0	0	0	0	0	0	1	0	1	0	0	0	0	0
1st PPS/C7H11P8	1st PPS	Americas	C7	H11	Female	24	12.600000381469727	Metronidazole	125	mg	3	375	29.76190386085196	GI tract infections	CAI	Empirical: pathogen determined	Invasive Ventilation	2	2	1	0	0	0	0	0	0	0	0	0	1	0	0	0	0	0
1st PPS/C7H11P9	1st PPS	Americas	C7	H11	Female	24	12.600000381469727	Ceftriaxone	600	mg	2	1200	95.23809235472626	GI tract infections	CAI	Empirical: pathogen determined	Invasive Ventilation	2	2	1	0	0	0	0	0	0	0	0	0	1	0	0	0	0	0
1st PPS/C7H9P1	1st PPS	Americas	C7	H9	Male	1	3	Amikacin	42	mg	1	42	14	Urinary Tract Infections (UTI)	HAI	Targeted	No Ventilation	1	1	2	0	0	0	0	0	0	0	1	0	0	0	1	0	0	0
1st PPS/C7H9P2	1st PPS	Americas	C7	H9	Male	24	14	Ceftriaxone	700	mg	2	1400	100	Sepsis	CAI	Empirical: pathogen determined	Unknown	1	1	2	0	0	0	0	0	0	0	0	0	0	1	0	0	0	1
1st PPS/C7H9P3	1st PPS	Americas	C7	H9	Male	7	4	Meropenem	160	mg	3	480	120	Sepsis	HAI	Empirical: awaiting culture	Invasive Ventilation	3	3	2	0	0	0	0	0	0	0	0	0	0	1	1	0	0	0
1st PPS/C7H9P4	1st PPS	Americas	C7	H9	Male	7	4	Amikacin	60	mg	1	60	15	Sepsis	HAI	Empirical: awaiting culture	Invasive Ventilation	3	3	2	0	0	0	0	0	0	0	0	0	0	1	1	0	0	0
1st PPS/C7H9P5	1st PPS	Americas	C7	H9	Female	7	5	Vancomycin	50	mg	4	200	40	CRBSI	HAI	Targeted	No Ventilation	1	1	1	0	0	0	0	1	0	0	0	0	0	0	0	0	0	0
1st PPS/C7H9P6	1st PPS	Americas	C7	H9	Female	11	6	Vancomycin	90	mg	4	360	60	Sepsis	HAI	Empirical: pathogen determined	No Ventilation	4	2	2	0	1	0	0	1	0	0	0	0	0	0	1	0	0	0
1st PPS/C7H9P7	1st PPS	Americas	C7	H9	Female	11	6	Meropenem	280	mg	3	840	140	Sepsis	HAI	Empirical: pathogen determined	No Ventilation	4	2	2	0	1	0	0	1	0	0	0	0	0	0	1	0	0	0
1st PPS/C7H9P8	1st PPS	Americas	C7	H9	Female	21	10	Amikacin	150	mg	1	150	15	Sepsis	HAI	Empirical: awaiting culture	No Ventilation	3	3	2	0	0	0	0	0	0	0	1	0	0	0	1	0	0	0
1st PPS/C7H9P9	1st PPS	Americas	C7	H9	Female	13	8	Vancomycin	90	mg	2	180	22.5	Sepsis	HAI	Empirical: awaiting culture	No Ventilation	4	3	1	0	0	0	0	1	0	0	0	0	0	0	0	0	0	0
1st PPS/C7H9P10	1st PPS	Americas	C7	H9	Female	13	8	Amikacin	140	mg	1	140	17.5	Sepsis	HAI	Empirical: awaiting culture	No Ventilation	4	3	1	0	0	0	0	1	0	0	0	0	0	0	0	0	0	0
1st PPS/C7H9P11	1st PPS	Americas	C7	H9	Female	13	8	Meropenem	370	mg	3	1110	138.75	Sepsis	HAI	Empirical: awaiting culture	No Ventilation	4	3	1	0	0	0	0	1	0	0	0	0	0	0	0	0	0	0
1st PPS/C7H9P12	1st PPS	Americas	C7	H9	Female	2	3	Amikacin	50	mg	1	50	16.666666666666668	CRBSI	HAI	Targeted	No Ventilation	2	2	1	0	0	0	0	0	0	0	0	0	0	0	0	0	1	0
1st PPS/C7H9P13	1st PPS	Americas	C7	H9	Female	2	3	Vancomycin	35	mg	4	140	46.666666666666664	CRBSI	HAI	Targeted	No Ventilation	2	2	1	0	0	0	0	0	0	0	0	0	0	0	0	0	1	0
1st PPS/C7H9P14	1st PPS	Americas	C7	H9	Female	20	11	Cefuroxime	550	mg	3	1650	150	Bacterial LRTI	CAI	Empirical: awaiting culture	No Ventilation	2	1	0	0	0	0	0	0	0	0	0	0	0	0	0	0	0	0
1st PPS/C7H9P15	1st PPS	Americas	C7	H9	Female	120	38	Cefuroxime	2000	mg	3	6000	157.89473684210526	Urinary Tract Infections (UTI)	CAI	Empirical: pathogen determined	No Ventilation	1	1	2	0	0	0	0	0	0	0	0	0	1	0	0	0	1	0
1st PPS/C7H9P16	1st PPS	Americas	C7	H9	Male	84	10	Vancomycin	150	mg	1	150	15	Cardiac Infections	HAI	Targeted	No Ventilation	1	1	2	0	0	0	0	0	1	0	0	0	0	0	0	0	1	0
1st PPS/C7H9P17	1st PPS	Americas	C7	H9	Male	96	33	Vancomycin	300	mg	4	1200	36.36363636363637	Central Nervous System (CNS) infections	CAI	Empirical: awaiting culture	No Ventilation	2	2	2	0	0	0	0	0	0	0	0	0	2	0	0	0	0	0
1st PPS/C7H9P18	1st PPS	Americas	C7	H9	Male	96	33	Cefepime	1600	mg	3	4800	145.45454545454547	Central Nervous System (CNS) infections	CAI	Empirical: awaiting culture	No Ventilation	2	2	2	0	0	0	0	0	0	0	0	0	2	0	0	0	0	0
1st PPS/C7H9P19	1st PPS	Americas	C7	H9	Male	3	6	Vancomycin	120	mg	4	480	80	Central Nervous System (CNS) infections	CAI	Empirical: awaiting culture	No Ventilation	2	2	2	0	0	0	0	0	0	0	0	0	2	0	0	0	0	0
1st PPS/C7H9P20	1st PPS	Americas	C7	H9	Male	3	6	Cefepime	350	mg	3	1050	175	Central Nervous System (CNS) infections	CAI	Empirical: awaiting culture	No Ventilation	2	2	2	0	0	0	0	0	0	0	0	0	2	0	0	0	0	0
1st PPS/C7H9P21	1st PPS	Americas	C7	H9	Male	60	24	Amikacin	500	mg	1	500	20.833333333333332	Bacterial LRTI	CAI	Targeted	Non-Invasive Ventilation	3	3	1	0	0	0	0	0	0	0	0	0	0	0	0	0	0	1
1st PPS/C7H9P22	1st PPS	Americas	C7	H9	Male	60	24	Ceftazidime	1200	mg	3	3600	150	Bacterial LRTI	CAI	Targeted	Non-Invasive Ventilation	3	3	1	0	0	0	0	0	0	0	0	0	0	0	0	0	0	1
1st PPS/C7H9P23	1st PPS	Americas	C7	H9	Female	24	13	Meropenem	550	mg	3	1650	126.92307692307692	Skin/Soft Tissue Infections (SSTI)	CAI	Empirical: awaiting culture	No Ventilation	2	2	0	0	0	0	0	0	0	0	0	0	0	0	0	0	0	0
1st PPS/C7H9P24	1st PPS	Americas	C7	H9	Female	24	13	Vancomycin	130	mg	4	520	40	Skin/Soft Tissue Infections (SSTI)	CAI	Empirical: awaiting culture	No Ventilation	2	2	0	0	0	0	0	0	0	0	0	0	0	0	0	0	0	0
1st PPS/C7H9P25	1st PPS	Americas	C7	H9	Female	84	20	Meropenem	800	mg	3	2400	120	Urinary Tract Infections (UTI)	HAI	Targeted	No Ventilation	3	3	3	1	0	0	0	0	2	0	0	0	0	0	1	0	1	0
1st PPS/C7H9P26	1st PPS	Americas	C7	H9	Female	84	20	Amikacin	300	mg	1	300	15	Urinary Tract Infections (UTI)	HAI	Targeted	No Ventilation	3	3	3	1	0	0	0	0	2	0	0	0	0	0	1	0	1	0
1st PPS/C7H9P27	1st PPS	Americas	C7	H9	Female	132	26	Amikacin	50	mg	1	50	1.9230769230769231	Bacterial LRTI	HAI	Targeted	Non-Invasive Ventilation	3	3	2	0	0	0	0	0	0	0	1	0	0	0	0	0	0	1
1st PPS/C7H9P28	1st PPS	Americas	C7	H9	Female	132	26	Meropenem	1600	mg	3	4800	184.6153846153846	Bacterial LRTI	HAI	Targeted	Non-Invasive Ventilation	3	3	2	0	0	0	0	0	0	0	1	0	0	0	0	0	0	1
1st PPS/C7H9P29	1st PPS	Americas	C7	H9	Male	60	15	Ceftriaxone	375	mg	2	750	50	Acute Otitis Media (AOM)	CAI	Targeted	No Ventilation	2	1	2	0	0	0	0	0	1	0	0	0	0	0	1	0	0	0
1st PPS/C7H9P30	1st PPS	Americas	C7	H9	Female	11	6	Meropenem	300	mg	3	900	150	Bacterial LRTI	HAI	Empirical: awaiting culture	No Ventilation	2	2	2	0	1	0	0	3	0	0	1	0	0	0	0	0	0	0
1st PPS/C7H9P31	1st PPS	Americas	C7	H9	Female	11	6	Vancomycin	75	mg	4	300	50	Bacterial LRTI	HAI	Empirical: awaiting culture	No Ventilation	2	2	2	0	1	0	0	3	0	0	1	0	0	0	0	0	0	0
1st PPS/C7H9P32	1st PPS	Americas	C7	H9	Male	18	7	Amikacin	120	mg	1	120	17.142857142857142	Urinary Tract Infections (UTI)	Unknown	Targeted	No Ventilation	1	1	2	0	0	0	0	0	2	0	0	0	0	1	0	0	0	0
1st PPS/C7H9P33	1st PPS	Americas	C7	H9	Male	60	14	Teicoplanin	170	mg	1	170	12.142857142857142	GI tract infections	Unknown	Empirical: awaiting culture	No Ventilation	2	2	2	0	0	0	0	0	0	0	1	0	1	0	0	0	0	0
1st PPS/C7H9P34	1st PPS	Americas	C7	H9	Male	60	14	Meropenem	360	mg	3	1080	77.14285714285714	GI tract infections	Unknown	Empirical: awaiting culture	No Ventilation	2	2	2	0	0	0	0	0	0	0	1	0	1	0	0	0	0	0
1st PPS/C7H9P35	1st PPS	Americas	C7	H9	Male	1	2	Ampicillin	125	mg	3	375	187.5	Sepsis	HAI	Empirical: awaiting culture	No Ventilation	3	3	1	0	0	0	0	1	0	0	0	0	0	0	0	0	0	0
1st PPS/C7H9P36	1st PPS	Americas	C7	H9	Male	1	2	Amikacin	37	mg	1	37	18.5	Sepsis	HAI	Empirical: awaiting culture	No Ventilation	3	3	1	0	0	0	0	1	0	0	0	0	0	0	0	0	0	0
1st PPS/C7H9P37	1st PPS	Americas	C7	H9	Male	1	2	Metronidazole	19	mg	2	38	19	Sepsis	HAI	Empirical: awaiting culture	No Ventilation	3	3	1	0	0	0	0	1	0	0	0	0	0	0	0	0	0	0
1st PPS/C7H9P38	1st PPS	Americas	C7	H9	Female	96	12	Vancomycin	120	mg	4	480	40	Urinary Tract Infections (UTI)	HAI	Empirical: awaiting culture	No Ventilation	3	3	3	0	0	0	0	0	0	0	1	0	0	2	0	0	1	0
1st PPS/C7H9P39	1st PPS	Americas	C7	H9	Female	96	12	Meropenem	500	mg	3	1500	125	Urinary Tract Infections (UTI)	HAI	Empirical: awaiting culture	No Ventilation	3	3	3	0	0	0	0	0	0	0	1	0	0	2	0	0	1	0
1st PPS/C7H9P40	1st PPS	Americas	C7	H9	Female	96	12	Amikacin	180	mg	1	180	15	Urinary Tract Infections (UTI)	HAI	Targeted	No Ventilation	3	3	3	0	0	0	0	0	0	0	1	0	0	2	0	0	1	0
1st PPS/C7H9P41	1st PPS	Americas	C7	H9	Male	60	19	Meropenem	500	mg	3	1500	78.94736842105263	Urinary Tract Infections (UTI)	HAI	Targeted	No Ventilation	4	3	1	0	0	0	0	0	0	0	0	0	0	0	1	0	0	0
1st PPS/C7H9P42	1st PPS	Americas	C7	H9	Male	60	19	Teicoplanin	200	mg	2	400	21.05263157894737	Unknown	HAI	Empirical: awaiting culture	No Ventilation	4	3	1	0	0	0	0	0	0	0	0	0	0	0	1	0	0	0
1st PPS/C7H9P43	1st PPS	Americas	C7	H9	Female	24	10	Metronidazole	75	mg	1	75	7.5	GI tract infections	CAI	Empirical: awaiting culture	No Ventilation	1	1	2	0	0	0	0	1	0	0	1	0	0	0	0	0	0	0
1st PPS/C7H9P44	1st PPS	Americas	C7	H9	Male	96	30	Vancomycin	330	mg	4	1320	44	Joint/Bone Infections	HAI	Targeted	No Ventilation	1	1	1	0	0	0	0	1	0	0	0	0	0	0	0	0	0	0
1st PPS/C7H9P45	1st PPS	Americas	C7	H9	Female	23	12	Ampicillin	300	mg	4	1200	100	Unknown	CAI	Empirical: awaiting culture	No Ventilation	3	2	1	0	0	0	0	0	0	0	0	0	0	0	1	0	0	0
2nd PPS/C7H12P37	2nd PPS	Americas	C7	H12	Male	6	5	Clindamycin	50	mg	4	200	40	Bacterial LRTI	CAI	Empirical: pathogen determined	Non-Invasive Ventilation	3	3	1	0	0	0	0	0	0	0	0	0	0	0	0	1	0	0
2nd PPS/C7H12P38	2nd PPS	Americas	C7	H12	Male	6	5	Ceftriaxone	250	mg	2	500	100	Bacterial LRTI	CAI	Empirical: pathogen determined	Non-Invasive Ventilation	3	3	1	0	0	0	0	0	0	0	0	0	0	0	0	1	0	0
2nd PPS/C7H12P39	2nd PPS	Americas	C7	H12	Female	15	10	Co-amoxiclav	200	mg	3	600	60	Bacterial LRTI	CAI	Empirical: pathogen determined	No Ventilation	3	2	0	0	0	0	0	0	0	0	0	0	0	0	0	0	0	0
2nd PPS/C7H12P40	2nd PPS	Americas	C7	H12	Male	48	13	Amikacin	260	mg	1	260	20	Sepsis	CAI	Empirical: pathogen determined	Non-Invasive Ventilation	3	3	1	0	0	0	0	0	0	0	0	0	2	0	0	0	0	0
2nd PPS/C7H12P41	2nd PPS	Americas	C7	H12	Male	48	13	Meropenem	520	mg	3	1560	120	Sepsis	CAI	Empirical: pathogen determined	Non-Invasive Ventilation	3	3	1	0	0	0	0	0	0	0	0	0	2	0	0	0	0	0
2nd PPS/C7H12P42	2nd PPS	Americas	C7	H12	Male	48	13	Vancomycin	130	mg	4	520	40	Sepsis	CAI	Empirical: pathogen determined	Non-Invasive Ventilation	3	3	1	0	0	0	0	0	0	0	0	0	2	0	0	0	0	0
2nd PPS/C7H12P43	2nd PPS	Americas	C7	H12	Female	12	7	Amikacin	150	mg	1	150	21.428571428571427	Bacterial LRTI	CAI	Empirical: pathogen determined	Invasive Ventilation	4	4	2	0	0	0	0	0	0	0	0	0	0	0	0	1	0	1
2nd PPS/C7H12P44	2nd PPS	Americas	C7	H12	Female	12	7	Vancomycin	112	mg	4	448	64	Bacterial LRTI	CAI	Empirical: pathogen determined	Invasive Ventilation	4	4	2	0	0	0	0	0	0	0	0	0	0	0	0	1	0	1
2nd PPS/C7H12P45	2nd PPS	Americas	C7	H12	Male	20	11	Vancomycin	121	mg	4	484	44	Bacterial LRTI	HAI	Targeted	Invasive Ventilation	5	4	0	0	0	0	0	0	0	0	0	0	0	0	0	0	0	0
2nd PPS/C7H12P46	2nd PPS	Americas	C7	H12	Male	20	11	Meropenem	472	mg	3	1416	128.72727272727272	Bacterial LRTI	HAI	Targeted	Invasive Ventilation	5	4	0	0	0	0	0	0	0	0	0	0	0	0	0	0	0	0
2nd PPS/C7H12P47	2nd PPS	Americas	C7	H12	Male	23	12	Co-amoxiclav	240	mg	3	720	60	Bacterial LRTI	CAI	Empirical: awaiting culture	No Ventilation	2	1	0	0	0	0	0	0	0	0	0	0	0	0	0	0	0	0
2nd PPS/C7H12P48	2nd PPS	Americas	C7	H12	Female	2	4	Ampicillin	200	mg	2	400	100	Bacterial LRTI	CAI	Empirical: pathogen determined	Non-Invasive Ventilation	4	3	0	0	0	0	0	0	0	0	0	0	0	0	0	0	0	0
2nd PPS/C7H12P49	2nd PPS	Americas	C7	H12	Female	2	4	Gentamicin	20	mg	1	20	5	Bacterial LRTI	CAI	Empirical: pathogen determined	Non-Invasive Ventilation	4	3	0	0	0	0	0	0	0	0	0	0	0	0	0	0	0	0
2nd PPS/C7H12P50	2nd PPS	Americas	C7	H12	Female	6	3	Gentamicin	14	mg	1	14	4.666666666666667	Sepsis	CAI	Empirical: pathogen determined	Invasive Ventilation	4	3	2	0	0	0	0	0	0	0	0	0	0	0	0	1	0	1
2nd PPS/C7H12P51	2nd PPS	Americas	C7	H12	Male	7	10	Co-amoxiclav	196	mg	3	588	58.8	Bacterial LRTI	Unknown	Empirical: awaiting culture	Non-Invasive Ventilation	2	2	0	0	0	0	0	0	0	0	0	0	0	0	0	0	0	0
2nd PPS/C7H12P52	2nd PPS	Americas	C7	H12	Male	132	64.76749935150147	Co-amoxiclav	1000	mg	3	3000	46.31952800460333	Bacterial LRTI	CAI	Empirical: awaiting culture	No Ventilation	2	2	1	0	0	0	1	0	0	0	0	0	0	0	0	0	0	0
2nd PPS/C7H12P53	2nd PPS	Americas	C7	H12	Male	23	13	Meropenem	520	mg	3	1560	120	Bacterial LRTI	HAI	Empirical: pathogen determined	No Ventilation	1	1	0	0	0	0	0	0	0	0	0	0	0	0	0	0	0	0
2nd PPS/C7H12P54	2nd PPS	Americas	C7	H12	Male	36	13	Co-amoxiclav	216	mg	3	648	49.84615384615385	Skin/Soft Tissue Infections (SSTI)	HAI	Targeted	No Ventilation	2	2	0	0	0	0	0	0	0	0	0	0	0	0	0	0	0	0
2nd PPS/C7H12P55	2nd PPS	Americas	C7	H12	Male	1	4	Ceftriaxone	210	mg	1	210	52.5	Acute Otitis Media (AOM)	CAI	Empirical: awaiting culture	No Ventilation	1	1	1	0	0	0	0	0	0	0	0	0	0	0	0	1	0	0
2nd PPS/C7H12P56	2nd PPS	Americas	C7	H12	Female	48	18	Co-amoxiclav	306	mg	3	918	51	Upper Respiratory Infections (URTI)	CAI	Empirical: awaiting culture	No Ventilation	1	1	0	0	0	0	0	0	0	0	0	0	0	0	0	0	0	0
2nd PPS/C7H12P57	2nd PPS	Americas	C7	H12	Male	9	8	Co-amoxiclav	133	mg	3	399	49.875	Bacterial LRTI	CAI	Empirical: awaiting culture	No Ventilation	1	1	0	0	0	0	0	0	0	0	0	0	0	0	0	0	0	0
2nd PPS/C7H12P58	2nd PPS	Americas	C7	H12	Female	19	12	Co-amoxiclav	200	mg	3	600	50	Bacterial LRTI	CAI	Empirical: awaiting culture	No Ventilation	2	2	0	0	0	0	0	0	0	0	0	0	0	0	0	0	0	0
2nd PPS/C7H12P59	2nd PPS	Americas	C7	H12	Male	21	11	Cefuroxime	565	mg	3	1695	154.0909090909091	Bacterial LRTI	CAI	Empirical: awaiting culture	No Ventilation	2	2	0	0	0	0	0	0	0	0	0	0	0	0	0	0	0	0
2nd PPS/C7H12P60	2nd PPS	Americas	C7	H12	Male	36	15	Co-amoxiclav	450	mg	3	1350	90	Bacterial LRTI	CAI	Empirical: awaiting culture	No Ventilation	1	1	0	0	0	0	0	0	0	0	0	0	0	0	0	0	0	0
2nd PPS/C7H12P61	2nd PPS	Americas	C7	H12	Female	24	13	Cefuroxime	650	mg	3	1950	150	Upper Respiratory Infections (URTI)	CAI	Empirical: awaiting culture	No Ventilation	1	1	0	0	0	0	0	0	0	0	0	0	0	0	0	0	0	0
2nd PPS/C7H12P62	2nd PPS	Americas	C7	H12	Female	24	12	Co-amoxiclav	240	mg	3	720	60	Bacterial LRTI	CAI	Empirical: awaiting culture	No Ventilation	1	1	0	0	0	0	0	0	0	0	0	0	0	0	0	0	0	0
2nd PPS/C7H12P63	2nd PPS	Americas	C7	H12	Female	72	20	Co-amoxiclav	597	mg	3	1791	89.55	Bacterial LRTI	CAI	Empirical: awaiting culture	No Ventilation	2	1	0	0	0	0	0	0	0	0	0	0	0	0	0	0	0	0
2nd PPS/C7H12P64	2nd PPS	Americas	C7	H12	Female	20	11	Co-amoxiclav	183	mg	3	549	49.90909090909091	Bacterial LRTI	CAI	Empirical: awaiting culture	No Ventilation	3	2	0	0	0	0	0	0	0	0	0	0	0	0	0	0	0	0
2nd PPS/C7H12P65	2nd PPS	Americas	C7	H12	Male	132	45	Ceftriaxone	2000	mg	2	4000	88.88888888888889	Sepsis	CAI	Empirical: pathogen determined	No Ventilation	1	1	1	0	0	0	0	0	1	0	0	0	0	0	0	0	0	0
2nd PPS/C7H12P66	2nd PPS	Americas	C7	H12	Female	84	27	Ampicillin	1375	mg	4	5500	203.7037037037037	Treatment for Surgical disease	CAI	Empirical: pathogen determined	No Ventilation	3	3	0	0	0	0	0	0	0	0	0	0	0	0	0	0	0	0
2nd PPS/C7H12P67	2nd PPS	Americas	C7	H12	Female	84	27	Gentamicin	206	mg	1	206	7.62962962962963	Treatment for Surgical disease	CAI	Empirical: pathogen determined	No Ventilation	3	3	0	0	0	0	0	0	0	0	0	0	0	0	0	0	0	0
2nd PPS/C7H12P68	2nd PPS	Americas	C7	H12	Female	84	27	Clindamycin	275	mg	4	1100	40.74074074074074	Treatment for Surgical disease	CAI	Empirical: pathogen determined	No Ventilation	3	3	0	0	0	0	0	0	0	0	0	0	0	0	0	0	0	0
2nd PPS/C7H12P69	2nd PPS	Americas	C7	H12	Female	11	10	Co-amoxiclav	315	mg	3	945	94.5	Bacterial LRTI	CAI	Empirical: awaiting culture	No Ventilation	1	1	0	0	0	0	0	0	0	0	0	0	0	0	0	0	0	0
2nd PPS/C7H12P70	2nd PPS	Americas	C7	H12	Female	9	9	Co-amoxiclav	155	mg	3	465	51.666666666666664	Bacterial LRTI	CAI	Empirical: awaiting culture	No Ventilation	1	1	0	0	0	0	0	0	0	0	0	0	0	0	0	0	0	0
2nd PPS/C7H12P71	2nd PPS	Americas	C7	H12	Female	12	8	Co-amoxiclav	145	mg	3	435	54.375	Bacterial LRTI	CAI	Empirical: awaiting culture	No Ventilation	2	2	0	0	0	0	0	0	0	0	0	0	0	0	0	0	0	0
2nd PPS/C7H12P72	2nd PPS	Americas	C7	H12	Female	36	16	Cefepime	830	mg	3	2490	155.625	Bacterial LRTI	CAI	Empirical: pathogen determined	No Ventilation	2	2	0	0	0	0	0	0	0	0	0	0	0	0	0	0	0	0
2nd PPS/C7H12P73	2nd PPS	Americas	C7	H12	Male	36	16	Co-amoxiclav	263	mg	3	789	49.3125	Bacterial LRTI	CAI	Empirical: awaiting culture	No Ventilation	1	1	0	0	0	0	0	0	0	0	0	0	0	0	0	0	0	0
2nd PPS/C7H12P74	2nd PPS	Americas	C7	H12	Male	23	15	Co-amoxiclav	450	mg	3	1350	90	Bacterial LRTI	CAI	Empirical: awaiting culture	No Ventilation	1	1	0	0	0	0	0	0	0	0	0	0	0	0	0	0	0	0
2nd PPS/C7H12P75	2nd PPS	Americas	C7	H12	Female	19	10	Co-amoxiclav	315	mg	3	945	94.5	Bacterial LRTI	CAI	Empirical: awaiting culture	No Ventilation	1	1	0	0	0	0	0	0	0	0	0	0	0	0	0	0	0	0
2nd PPS/C7H12P76	2nd PPS	Americas	C7	H12	Female	14	10	Co-amoxiclav	163	mg	3	489	48.9	Bacterial LRTI	CAI	Empirical: awaiting culture	No Ventilation	2	2	0	0	0	0	0	0	0	0	0	0	0	0	0	0	0	0
2nd PPS/C7H12P77	2nd PPS	Americas	C7	H12	Male	7	6	Amikacin	120	mg	1	120	20	Bacterial LRTI	CAI	Empirical: pathogen determined	Invasive Ventilation	5	4	1	0	0	0	0	0	0	0	0	0	1	0	0	0	0	0
2nd PPS/C7H12P78	2nd PPS	Americas	C7	H12	Male	7	6	Vancomycin	60	mg	4	240	40	Bacterial LRTI	CAI	Empirical: pathogen determined	Invasive Ventilation	5	4	1	0	0	0	0	0	0	0	0	0	1	0	0	0	0	0
2nd PPS/C7H12P79	2nd PPS	Americas	C7	H12	Male	84	26	Co-amoxiclav	433	mg	3	1299	49.96153846153846	Bacterial LRTI	CAI	Empirical: awaiting culture	No Ventilation	1	1	0	0	0	0	0	0	0	0	0	0	0	0	0	0	0	0
2nd PPS/C7H12P80	2nd PPS	Americas	C7	H12	Female	12	9	Cefepime	450	mg	3	1350	150	Bacterial LRTI	CAI	Empirical: pathogen determined	No Ventilation	3	3	0	0	0	0	0	0	0	0	0	0	0	0	0	0	0	0
2nd PPS/C7H12P81	2nd PPS	Americas	C7	H12	Female	12	9	Vancomycin	135	mg	4	540	60	Bacterial LRTI	CAI	Empirical: pathogen determined	No Ventilation	3	3	0	0	0	0	0	0	0	0	0	0	0	0	0	0	0	0
2nd PPS/C7H12P82	2nd PPS	Americas	C7	H12	Male	16	11	Cefuroxime	550	mg	3	1650	150	Bacterial LRTI	CAI	Empirical: awaiting culture	No Ventilation	1	1	0	0	0	0	0	0	0	0	0	0	0	0	0	0	0	0
2nd PPS/C7H12P83	2nd PPS	Americas	C7	H12	Female	8	6	Cefuroxime	305	mg	3	915	152.5	Upper Respiratory Infections (URTI)	CAI	Empirical: awaiting culture	No Ventilation	1	1	1	0	0	0	0	0	0	0	0	0	0	0	0	0	0	1
2nd PPS/C7H12P84	2nd PPS	Americas	C7	H12	Female	24	12	Co-amoxiclav	360	mg	3	1080	90	Upper Respiratory Infections (URTI)	CAI	Empirical: awaiting culture	No Ventilation	1	1	1	0	0	0	0	0	0	0	0	0	1	0	0	0	0	0
2nd PPS/C7H12P85	2nd PPS	Americas	C7	H12	Female	36	9	Co-amoxiclav	273	mg	3	819	91	Bacterial LRTI	CAI	Empirical: awaiting culture	No Ventilation	1	1	1	0	0	0	0	0	0	0	0	0	1	0	0	0	0	0
2nd PPS/C7H12P86	2nd PPS	Americas	C7	H12	Male	24	15	Cefuroxime	760	mg	3	2280	152	Bacterial LRTI	CAI	Empirical: awaiting culture	No Ventilation	1	1	0	0	0	0	0	0	0	0	0	0	0	0	0	0	0	0
2nd PPS/C7H12P87	2nd PPS	Americas	C7	H12	Male	96	54	Gentamicin	300	mg	1	300	5.555555555555555	Treatment for Surgical disease	CAI	Empirical: awaiting culture	No Ventilation	3	3	0	0	0	0	0	0	0	0	0	0	0	0	0	0	0	0
2nd PPS/C7H12P88	2nd PPS	Americas	C7	H12	Male	96	54	Ampicillin	2000	mg	4	8000	148.14814814814815	Treatment for Surgical disease	CAI	Empirical: awaiting culture	No Ventilation	3	3	0	0	0	0	0	0	0	0	0	0	0	0	0	0	0	0
2nd PPS/C7H12P89	2nd PPS	Americas	C7	H12	Male	96	54	Clindamycin	300	mg	4	1200	22.22222222222222	Treatment for Surgical disease	CAI	Empirical: awaiting culture	No Ventilation	3	3	0	0	0	0	0	0	0	0	0	0	0	0	0	0	0	0
2nd PPS/C7H12P90	2nd PPS	Americas	C7	H12	Female	11	5	Vancomycin	52	mg	4	208	41.6	Viral LRTI	HAI	Empirical: pathogen determined	Non-Invasive Ventilation	5	5	1	0	0	0	0	0	0	0	3	0	0	0	0	0	0	0
2nd PPS/C7H12P91	2nd PPS	Americas	C7	H12	Female	11	5	Amikacin	26	mg	3	78	15.6	Urinary Tract Infections (UTI)	HAI	Empirical: pathogen determined	Non-Invasive Ventilation	5	5	1	0	0	0	0	0	0	0	3	0	0	0	0	0	0	0
2nd PPS/C7H12P92	2nd PPS	Americas	C7	H12	Male	7	8	Co-amoxiclav	140	mg	3	420	52.5	Bacterial LRTI	CAI	Empirical: awaiting culture	No Ventilation	1	1	0	0	0	0	0	0	0	0	0	0	0	0	0	0	0	0
2nd PPS/C7H12P93	2nd PPS	Americas	C7	H12	Female	5	7	Co-amoxiclav	210	mg	3	630	90	Bacterial LRTI	CAI	Empirical: awaiting culture	No Ventilation	1	1	0	0	0	0	0	0	0	0	0	0	0	0	0	0	0	0
2nd PPS/C7H12P94	2nd PPS	Americas	C7	H12	Female	15	10	Co-amoxiclav	300	mg	3	900	90	Febrile neutropenia/Fever	CAI	Empirical: awaiting culture	No Ventilation	1	1	0	0	0	0	0	0	0	0	0	0	0	0	0	0	0	0
2nd PPS/C7H12P95	2nd PPS	Americas	C7	H12	Male	36	12	Ciprofloxacin	188	mg	3	564	47	Sepsis	CAI	Empirical: pathogen determined	No Ventilation	1	1	0	0	0	0	0	0	0	0	0	0	0	0	0	0	0	0
2nd PPS/C7H12P96	2nd PPS	Americas	C7	H12	Female	23	11	Co-amoxiclav	330	mg	3	990	90	Bacterial LRTI	CAI	Empirical: awaiting culture	No Ventilation	1	1	0	0	0	0	0	0	0	0	0	0	0	0	0	0	0	0
2nd PPS/C7H12P97	2nd PPS	Americas	C7	H12	Male	36	15	Co-amoxiclav	450	mg	3	1350	90	Urinary Tract Infections (UTI)	CAI	Empirical: pathogen determined	No Ventilation	1	1	1	0	0	0	0	0	0	0	0	0	0	1	0	0	0	0
2nd PPS/C7H12P98	2nd PPS	Americas	C7	H12	Male	24	17	Co-amoxiclav	504	mg	3	1512	88.94117647058823	Acute Otitis Media (AOM)	CAI	Empirical: awaiting culture	No Ventilation	1	1	1	0	0	0	0	0	0	0	0	0	0	0	0	0	0	1
2nd PPS/C7H12P99	2nd PPS	Americas	C7	H12	Male	96	30	Ampicillin	1500	mg	4	6000	200	Treatment for Surgical disease	CAI	Empirical: awaiting culture	No Ventilation	3	3	0	0	0	0	0	0	0	0	0	0	0	0	0	0	0	0
2nd PPS/C7H12P100	2nd PPS	Americas	C7	H12	Male	96	30	Clindamycin	300	mg	4	1200	40	Treatment for Surgical disease	CAI	Empirical: awaiting culture	No Ventilation	3	3	0	0	0	0	0	0	0	0	0	0	0	0	0	0	0	0
2nd PPS/C7H12P101	2nd PPS	Americas	C7	H12	Male	96	30	Gentamicin	225	mg	1	225	7.5	Treatment for Surgical disease	CAI	Empirical: awaiting culture	No Ventilation	3	3	0	0	0	0	0	0	0	0	0	0	0	0	0	0	0	0
2nd PPS/C7H12P102	2nd PPS	Americas	C7	H12	Female	24	11	Cefepime	550	mg	3	1650	150	Skin/Soft Tissue Infections (SSTI)	CAI	Empirical: awaiting culture	No Ventilation	5	3	1	0	0	0	0	0	0	1	0	0	0	0	0	0	0	0
2nd PPS/C7H12P103	2nd PPS	Americas	C7	H12	Female	24	11	Vancomycin	110	mg	4	440	40	Skin/Soft Tissue Infections (SSTI)	CAI	Empirical: awaiting culture	No Ventilation	5	3	1	0	0	0	0	0	0	1	0	0	0	0	0	0	0	0
2nd PPS/C7H10P9	2nd PPS	Americas	C7	H10	Male	36	10	Meropenem	400	mg	3	1200	120	Central Nervous System (CNS) infections	HAI	Empirical: pathogen determined	Non-Invasive Ventilation	4	3	2	0	0	1	0	1	0	0	0	0	0	0	0	0	0	0
2nd PPS/C7H10P10	2nd PPS	Americas	C7	H10	Male	36	10	Vancomycin	150	mg	4	600	60	Central Nervous System (CNS) infections	HAI	Empirical: pathogen determined	Non-Invasive Ventilation	4	3	2	0	0	1	0	1	0	0	0	0	0	0	0	0	0	0
2nd PPS/C7H10P11	2nd PPS	Americas	C7	H10	Male	36	10	Amikacin	30	mg	1	30	3	Central Nervous System (CNS) infections	HAI	Empirical: pathogen determined	Non-Invasive Ventilation	4	3	2	0	0	1	0	1	0	0	0	0	0	0	0	0	0	0
2nd PPS/C7H10P12	2nd PPS	Americas	C7	H10	Female	72	18	Vancomycin	250	mg	1	250	13.88888888888889	CRBSI	HAI	Empirical: pathogen determined	No Ventilation	2	2	1	1	0	0	0	0	0	0	0	0	0	0	0	0	1	0
2nd PPS/C7H10P13	2nd PPS	Americas	C7	H10	Female	72	18	Cefepime	900	mg	2	1800	100	CRBSI	HAI	Empirical: pathogen determined	No Ventilation	2	2	1	1	0	0	0	0	0	0	0	0	0	0	0	0	1	0
2nd PPS/C7H10P14	2nd PPS	Americas	C7	H10	Female	3	5	Cefepime	250	mg	3	750	150	Bacterial LRTI	HAI	Empirical: pathogen determined	Invasive Ventilation	2	2	0	0	0	0	0	0	0	0	0	0	0	0	0	0	0	0
2nd PPS/C7H10P15	2nd PPS	Americas	C7	H10	Female	3	5	Vancomycin	75	mg	4	300	60	Bacterial LRTI	HAI	Empirical: pathogen determined	Invasive Ventilation	2	2	0	0	0	0	0	0	0	0	0	0	0	0	0	0	0	0
2nd PPS/C7H10P16	2nd PPS	Americas	C7	H10	Male	24	9	Vancomycin	100	mg	1	100	11.11111111111111	Other	HAI	Targeted	No Ventilation	1	1	2	1	0	0	0	0	0	0	0	0	0	1	0	0	1	0
2nd PPS/C7H10P17	2nd PPS	Americas	C7	H10	Female	108	20	Ciprofloxacin	200	mg	2	400	20	Urinary Tract Infections (UTI)	CAI	Targeted	No Ventilation	1	1	1	0	0	0	3	0	0	0	0	0	0	0	0	0	0	0
2nd PPS/C7H10P18	2nd PPS	Americas	C7	H10	Male	18	10	Co-amoxiclav	150	mg	3	450	45	Bacterial LRTI	CAI	Empirical: awaiting culture	No Ventilation	3	2	1	0	0	0	0	0	0	1	0	0	0	0	0	0	0	0
2nd PPS/C7H10P19	2nd PPS	Americas	C7	H10	Male	120	32	Cefepime	1600	mg	3	4800	150	Bacterial LRTI	CAI	Targeted	No Ventilation	3	3	1	0	0	0	0	0	0	0	0	0	0	0	0	0	0	1
2nd PPS/C7H10P20	2nd PPS	Americas	C7	H10	Male	120	32	Amikacin	300	mg	3	900	28.125	Bacterial LRTI	CAI	Targeted	No Ventilation	3	3	1	0	0	0	0	0	0	0	0	0	0	0	0	0	0	1
2nd PPS/C7H10P21	2nd PPS	Americas	C7	H10	Male	24	14	Ciprofloxacin	200	mg	2	400	28.571428571428573	Urinary Tract Infections (UTI)	HAI	Targeted	No Ventilation	1	1	1	0	0	0	0	0	0	0	0	0	1	0	0	0	0	0
2nd PPS/C7H11P10	2nd PPS	Americas	C7	H11	Female	2	4.894999980926514	Teicoplanin	50	mg	1	50	10.214504636328133	CRBSI	HAI	Targeted	No Ventilation	6	3	1	0	0	0	0	0	1	0	0	0	0	0	0	0	0	0
2nd PPS/C7H11P11	2nd PPS	Americas	C7	H11	Female	2	4.894999980926514	Ceftazidime	250	mg	3	750	153.21756954492201	CRBSI	HAI	Targeted	No Ventilation	6	3	1	0	0	0	0	0	1	0	0	0	0	0	0	0	0	0
2nd PPS/C7H11P12	2nd PPS	Americas	C7	H11	Female	72	26	Ceftriaxone	650	mg	2	1300	50	Treatment for Surgical disease	CAI	Empirical: awaiting culture	No Ventilation	1	1	1	0	0	0	0	0	0	0	0	0	0	0	0	0	1	0
2nd PPS/C7H11P13	2nd PPS	Americas	C7	H11	Female	72	27.600000381469727	Metronidazole	500	mg	3	1500	54.347825335795285	Treatment for Surgical disease	CAI	Empirical: awaiting culture	No Ventilation	2	2	2	0	0	0	0	0	0	0	0	0	1	0	0	0	1	0
2nd PPS/C7H11P14	2nd PPS	Americas	C7	H11	Female	72	27.600000381469727	Ceftriaxone	1000	mg	2	2000	72.46376711439372	Treatment for Surgical disease	CAI	Empirical: awaiting culture	No Ventilation	2	2	2	0	0	0	0	0	0	0	0	0	1	0	0	0	1	0
2nd PPS/C7H11P15	2nd PPS	Americas	C7	H11	Female	72	22	Clindamycin	200	mg	4	800	36.36363636363637	Joint/Bone Infections	HAI	Empirical: awaiting culture	No Ventilation	2	2	3	0	0	0	0	0	0	0	0	3	0	0	0	0	0	0
2nd PPS/C7H11P16	2nd PPS	Americas	C7	H11	Female	72	22	Ciprofloxacin	100	mg	2	200	9.090909090909092	Joint/Bone Infections	HAI	Empirical: awaiting culture	No Ventilation	2	2	3	0	0	0	0	0	0	0	0	3	0	0	0	0	0	0
2nd PPS/C7H11P17	2nd PPS	Americas	C7	H11	Male	6	6.949999809265137	Ampicillin	320	mg	4	1280	184.17266692491344	CRBSI	HAI	Targeted	No Ventilation	1	1	2	0	0	0	0	1	0	0	0	0	0	1	0	0	0	0
2nd PPS/C7H11P18	2nd PPS	Americas	C7	H11	Male	12	3.859999895095825	Amikacin	58	mg	1	58	15.025907144114091	Sepsis	HAI	Empirical: pathogen determined	No Ventilation	2	2	1	0	0	1	0	0	0	0	0	0	0	0	0	0	0	0
2nd PPS/C7H11P19	2nd PPS	Americas	C7	H11	Male	1	2.7799999713897705	Amikacin	42	mg	1	42	15.10791382454708	Sepsis	HAI	Empirical: pathogen determined	No Ventilation	2	2	3	0	0	1	0	1	0	0	0	0	1	0	0	0	0	0
2nd PPS/C7H11P20	2nd PPS	Americas	C7	H11	Male	4	3.740000009536743	Meropenem	140	mg	3	420	112.29946495428578	Bacterial LRTI	HAI	Empirical: pathogen determined	Invasive Ventilation	3	2	3	0	0	1	0	0	0	0	1	0	0	1	0	0	0	0
2nd PPS/C7H11P21	2nd PPS	Americas	C7	H11	Male	4	3.740000009536743	Teicoplanin	38	mg	2	76	20.320855563156474	Bacterial LRTI	HAI	Empirical: pathogen determined	Invasive Ventilation	3	2	3	0	0	1	0	0	0	0	1	0	0	1	0	0	0	0
2nd PPS/C7H11P22	2nd PPS	Americas	C7	H11	Male	13	11	Cefepime	550	mg	3	1650	150	Bacterial LRTI	HAI	Targeted	Non-Invasive Ventilation	2	2	0	0	0	0	0	0	0	0	0	0	0	0	0	0	0	0
2nd PPS/C7H11P23	2nd PPS	Americas	C7	H11	Male	13	11	Vancomycin	170	mg	4	680	61.81818181818182	CRBSI	HAI	Targeted	Non-Invasive Ventilation	2	2	0	0	0	0	0	0	0	0	0	0	0	0	0	0	0	0
2nd PPS/C7H11P24	2nd PPS	Americas	C7	H11	Female	2	3.200000047683716	Meropenem	130	mg	3	390	121.87499818392101	GI tract infections	Unknown	Empirical: awaiting culture	Invasive Ventilation	3	2	1	0	0	0	0	0	0	0	0	0	0	1	0	0	0	0
2nd PPS/C7H11P25	2nd PPS	Americas	C7	H11	Female	2	3.200000047683716	Vancomycin	50	mg	4	200	62.49999906867744	GI tract infections	Unknown	Empirical: awaiting culture	Invasive Ventilation	3	2	1	0	0	0	0	0	0	0	0	0	0	1	0	0	0	0
2nd PPS/C7H11P26	2nd PPS	Americas	C7	H11	Female	4	6.75	Ceftriaxone	350	mg	1	350	51.851851851851855	Other	CAI	Empirical: awaiting culture	No Ventilation	1	1	0	0	0	0	0	0	0	0	0	0	0	0	0	0	0	0
3rd PPS/C7H12P104	3rd PPS	Americas	C7	H12	Male	12	8	Amikacin	176	mg	1	176	22	GI tract infections	CAI	Empirical: pathogen determined	No Ventilation	3	2	1	0	0	0	0	0	0	0	0	0	0	0	1	0	0	0
3rd PPS/C7H12P105	3rd PPS	Americas	C7	H12	Male	12	8	Ampicillin	400	mg	4	1600	200	GI tract infections	CAI	Empirical: pathogen determined	No Ventilation	3	2	1	0	0	0	0	0	0	0	0	0	0	0	1	0	0	0
3rd PPS/C7H12P106	3rd PPS	Americas	C7	H12	Female	72	33	Ampicillin	1650	mg	4	6600	200	Pyrexia of Unknown Origin (PUO)	CAI	Empirical: awaiting culture	No Ventilation	1	1	0	0	0	0	0	0	0	0	0	0	0	0	0	0	0	0
3rd PPS/C7H12P107	3rd PPS	Americas	C7	H12	Male	96	30	Co-amoxiclav	500	mg	3	1500	50	Upper Respiratory Infections (URTI)	CAI	Empirical: awaiting culture	No Ventilation	1	1	0	0	0	0	0	0	0	0	0	0	0	0	0	0	0	0
3rd PPS/C7H12P108	3rd PPS	Americas	C7	H12	Female	84	18	Cefuroxime	900	mg	3	2700	150	Urinary Tract Infections (UTI)	CAI	Empirical: pathogen determined	No Ventilation	1	1	0	0	0	0	0	0	0	0	0	0	0	0	0	0	0	0
3rd PPS/C7H12P109	3rd PPS	Americas	C7	H12	Female	60	48	Co-amoxiclav	811	mg	3	2433	50.6875	Urinary Tract Infections (UTI)	CAI	Empirical: pathogen determined	No Ventilation	1	1	0	0	0	0	0	0	0	0	0	0	0	0	0	0	0	0
3rd PPS/C7H12P110	3rd PPS	Americas	C7	H12	Female	36	13	Vancomycin	130	mg	4	520	40	Bacterial LRTI	CAI	Empirical: pathogen determined	No Ventilation	4	4	1	0	0	0	0	0	0	0	0	0	0	0	0	0	0	1
3rd PPS/C7H12P111	3rd PPS	Americas	C7	H12	Female	1	4	Ampicillin	185	mg	4	740	185	Urinary Tract Infections (UTI)	CAI	Empirical: pathogen determined	No Ventilation	2	2	0	0	0	0	0	0	0	0	0	0	0	0	0	0	0	0
3rd PPS/C7H12P112	3rd PPS	Americas	C7	H12	Female	1	4	Gentamicin	28	mg	1	28	7	Urinary Tract Infections (UTI)	CAI	Empirical: pathogen determined	No Ventilation	2	2	0	0	0	0	0	0	0	0	0	0	0	0	0	0	0	0
3rd PPS/C7H12P113	3rd PPS	Americas	C7	H12	Male	72	25	Co-amoxiclav	412	mg	3	1236	49.44	Bacterial LRTI	CAI	Empirical: awaiting culture	No Ventilation	1	1	0	0	0	0	0	0	0	0	0	0	0	0	0	0	0	0
3rd PPS/C7H12P114	3rd PPS	Americas	C7	H12	Male	60	29	Ampicillin	1450	mg	4	5800	200	Bacterial LRTI	CAI	Empirical: awaiting culture	No Ventilation	1	1	1	0	0	0	0	0	0	0	0	0	0	0	1	0	0	0
3rd PPS/C7H12P115	3rd PPS	Americas	C7	H12	Male	72	20	Co-amoxiclav	333	mg	3	999	49.95	Bacterial LRTI	CAI	Empirical: awaiting culture	No Ventilation	1	1	0	0	0	0	0	0	0	0	0	0	0	0	0	0	0	0
3rd PPS/C7H12P116	3rd PPS	Americas	C7	H12	Female	36	13	Co-amoxiclav	233	mg	3	699	53.76923076923077	Bacterial LRTI	CAI	Empirical: awaiting culture	No Ventilation	1	1	0	0	0	0	0	0	0	0	0	0	0	0	0	0	0	0
3rd PPS/C7H12P117	3rd PPS	Americas	C7	H12	Female	72	18	Co-amoxiclav	525	mg	3	1575	87.5	Bacterial LRTI	CAI	Empirical: awaiting culture	No Ventilation	1	1	0	0	0	0	0	0	0	0	0	0	0	0	0	0	0	0
3rd PPS/C7H12P118	3rd PPS	Americas	C7	H12	Male	60	23	Co-amoxiclav	690	mg	3	2070	90	GI tract infections	CAI	Empirical: pathogen determined	No Ventilation	1	1	0	0	0	0	0	0	0	0	0	0	0	0	0	0	0	0
3rd PPS/C7H12P119	3rd PPS	Americas	C7	H12	Female	96	46	Co-amoxiclav	766	mg	3	2298	49.95652173913044	Treatment for Surgical disease	CAI	Empirical: pathogen determined	No Ventilation	1	1	1	0	0	0	0	0	0	0	0	0	0	0	0	0	0	1
3rd PPS/C7H12P120	3rd PPS	Americas	C7	H12	Female	36	14	Co-amoxiclav	250	mg	3	750	53.57142857142857	Bacterial LRTI	CAI	Empirical: awaiting culture	No Ventilation	1	1	1	0	0	0	0	0	0	0	0	0	0	0	0	0	0	1
3rd PPS/C7H12P121	3rd PPS	Americas	C7	H12	Female	2	6	Co-amoxiclav	200	mg	3	600	100	Urinary Tract Infections (UTI)	CAI	Targeted	No Ventilation	1	1	0	0	0	0	0	0	0	0	0	0	0	0	0	0	0	0
3rd PPS/C7H12P122	3rd PPS	Americas	C7	H12	Male	24	15	Ampicillin	750	mg	4	3000	200	Bacterial LRTI	CAI	Empirical: awaiting culture	No Ventilation	1	1	0	0	0	0	0	0	0	0	0	0	0	0	0	0	0	0
3rd PPS/C7H12P123	3rd PPS	Americas	C7	H12	Female	16	13	Ampicillin	650	mg	4	2600	200	Bacterial LRTI	CAI	Empirical: awaiting culture	No Ventilation	1	1	0	0	0	0	0	0	0	0	0	0	0	0	0	0	0	0
3rd PPS/C7H12P124	3rd PPS	Americas	C7	H12	Female	24	12	Co-amoxiclav	360	mg	3	1080	90	Acute Otitis Media (AOM)	CAI	Empirical: awaiting culture	No Ventilation	1	1	0	0	0	0	0	0	0	0	0	0	0	0	0	0	0	0
3rd PPS/C7H12P125	3rd PPS	Americas	C7	H12	Male	60	21	Clindamycin	214	mg	4	856	40.76190476190476	Skin/Soft Tissue Infections (SSTI)	CAI	Empirical: awaiting culture	No Ventilation	1	1	0	0	0	0	0	0	0	0	0	0	0	0	0	0	0	0
3rd PPS/C7H12P126	3rd PPS	Americas	C7	H12	Female	11	11	Ampicillin	580	mg	4	2320	210.9090909090909	Bacterial LRTI	CAI	Empirical: awaiting culture	No Ventilation	1	1	0	0	0	0	0	0	0	0	0	0	0	0	0	0	0	0
3rd PPS/C7H12P127	3rd PPS	Americas	C7	H12	Female	36	15	Co-amoxiclav	250	mg	3	750	50	Bacterial LRTI	CAI	Empirical: pathogen determined	No Ventilation	3	2	0	0	0	0	0	0	0	0	0	0	0	0	0	0	0	0
3rd PPS/C7H12P128	3rd PPS	Americas	C7	H12	Female	3	2	Ciprofloxacin	35	mg	2	70	35	Bacterial LRTI	HAI	Targeted	Invasive Ventilation	4	3	1	0	0	0	0	0	0	0	0	0	0	0	0	1	0	0
3rd PPS/C7H12P129	3rd PPS	Americas	C7	H12	Female	3	2	Vancomycin	27	mg	3	81	40.5	Bacterial LRTI	HAI	Targeted	Invasive Ventilation	4	3	1	0	0	0	0	0	0	0	0	0	0	0	0	1	0	0
3rd PPS/C7H12P130	3rd PPS	Americas	C7	H12	Male	2	3	Cefepime	181	mg	2	362	120.66666666666667	Sepsis	HAI	Empirical: pathogen determined	No Ventilation	2	2	1	0	0	0	0	0	0	0	0	0	1	0	0	0	0	0
3rd PPS/C7H12P131	3rd PPS	Americas	C7	H12	Male	2	3	Vancomycin	54	mg	4	216	72	Sepsis	HAI	Empirical: pathogen determined	No Ventilation	2	2	1	0	0	0	0	0	0	0	0	0	1	0	0	0	0	0
3rd PPS/C7H12P132	3rd PPS	Americas	C7	H12	Male	48	14	Meropenem	560	mg	3	1680	120	Bacterial LRTI	CAI	Empirical: pathogen determined	Non-Invasive Ventilation	5	4	1	0	0	0	0	0	0	1	0	0	0	0	0	0	0	0
3rd PPS/C7H12P133	3rd PPS	Americas	C7	H12	Male	48	14	Vancomycin	150	mg	4	600	42.857142857142854	Bacterial LRTI	CAI	Empirical: pathogen determined	Non-Invasive Ventilation	5	4	1	0	0	0	0	0	0	1	0	0	0	0	0	0	0	0
3rd PPS/C7H12P134	3rd PPS	Americas	C7	H12	Female	24	15	Cefepime	750	mg	3	2250	150	Bacterial LRTI	HAI	Empirical: pathogen determined	Non-Invasive Ventilation	2	2	1	0	0	0	0	0	0	1	0	0	0	0	0	0	0	0
3rd PPS/C7H12P135	3rd PPS	Americas	C7	H12	Female	24	15	Vancomycin	150	mg	4	600	40	Bacterial LRTI	HAI	Empirical: pathogen determined	Non-Invasive Ventilation	2	2	1	0	0	0	0	0	0	1	0	0	0	0	0	0	0	0
3rd PPS/C7H12P136	3rd PPS	Americas	C7	H12	Male	7	5	Co-amoxiclav	83	mg	3	249	49.8	Bacterial LRTI	CAI	Empirical: pathogen determined	Non-Invasive Ventilation	3	2	1	0	0	0	0	0	0	0	0	0	0	0	0	0	0	1
3rd PPS/C7H12P137	3rd PPS	Americas	C7	H12	Female	24	12	Co-amoxiclav	240	mg	3	720	60	Bacterial LRTI	CAI	Empirical: pathogen determined	Non-Invasive Ventilation	2	2	0	0	0	0	0	0	0	0	0	0	0	0	0	0	0	0
3rd PPS/C7H12P138	3rd PPS	Americas	C7	H12	Male	8	7	Ceftazidime	375	mg	3	1125	160.71428571428572	GI tract infections	HAI	Empirical: pathogen determined	Non-Invasive Ventilation	4	4	1	0	0	0	0	1	0	0	0	0	0	0	0	0	0	0
3rd PPS/C7H12P139	3rd PPS	Americas	C7	H12	Male	8	7	Meropenem	300	mg	3	900	128.57142857142858	GI tract infections	HAI	Empirical: pathogen determined	Non-Invasive Ventilation	4	4	1	0	0	0	0	1	0	0	0	0	0	0	0	0	0	0
3rd PPS/C7H12P140	3rd PPS	Americas	C7	H12	Female	8	7	Ceftriaxone	450	mg	2	900	128.57142857142858	Central Nervous System (CNS) infections	CAI	Targeted	Invasive Ventilation	2	2	0	0	0	0	0	0	0	0	0	0	0	0	0	0	0	0
3rd PPS/C7H12P141	3rd PPS	Americas	C7	H12	Female	8	7	Vancomycin	115	mg	4	460	65.71428571428571	Central Nervous System (CNS) infections	CAI	Targeted	Invasive Ventilation	2	2	0	0	0	0	0	0	0	0	0	0	0	0	0	0	0	0
3rd PPS/C7H12P142	3rd PPS	Americas	C7	H12	Male	120	47	Ciprofloxacin	200	mg	2	400	8.51063829787234	Treatment for Surgical disease	CAI	Empirical: pathogen determined	No Ventilation	2	2	0	0	0	0	0	0	0	0	0	0	0	0	0	0	0	0
3rd PPS/C7H12P143	3rd PPS	Americas	C7	H12	Male	120	47	Clindamycin	564	mg	4	2256	48	Treatment for Surgical disease	CAI	Empirical: pathogen determined	No Ventilation	2	2	0	0	0	0	0	0	0	0	0	0	0	0	0	0	0	0
3rd PPS/C7H12P144	3rd PPS	Americas	C7	H12	Male	36	11	Cefepime	600	mg	3	1800	163.63636363636363	Urinary Tract Infections (UTI)	HAI	Targeted	Non-Invasive Ventilation	5	4	1	0	0	0	0	0	0	1	0	0	0	0	0	0	0	0
3rd PPS/C7H12P145	3rd PPS	Americas	C7	H12	Male	36	11	Vancomycin	170	mg	4	680	61.81818181818182	CRBSI	HAI	Targeted	Non-Invasive Ventilation	5	4	1	0	0	0	0	0	0	1	0	0	0	0	0	0	0	0
3rd PPS/C7H12P146	3rd PPS	Americas	C7	H12	Male	36	11	Amikacin	240	mg	1	240	21.818181818181817	Urinary Tract Infections (UTI)	HAI	Targeted	Non-Invasive Ventilation	5	4	1	0	0	0	0	0	0	1	0	0	0	0	0	0	0	0
3rd PPS/C7H12P147	3rd PPS	Americas	C7	H12	Male	48	27	Ciprofloxacin	400	mg	2	800	29.62962962962963	Bacterial LRTI	HAI	Empirical: pathogen determined	Non-Invasive Ventilation	2	2	1	0	0	0	0	0	0	0	0	0	1	0	0	0	0	0
3rd PPS/C7H12P148	3rd PPS	Americas	C7	H12	Male	48	27	Clindamycin	270	mg	4	1080	40	Bacterial LRTI	HAI	Empirical: pathogen determined	Non-Invasive Ventilation	2	2	1	0	0	0	0	0	0	0	0	0	1	0	0	0	0	0
3rd PPS/C7H12P149	3rd PPS	Americas	C7	H12	Male	24	12	Ceftriaxone	600	mg	2	1200	100	Treatment for Surgical disease	CAI	Empirical: pathogen determined	No Ventilation	2	2	0	0	0	0	0	0	0	0	0	0	0	0	0	0	0	0
3rd PPS/C7H12P150	3rd PPS	Americas	C7	H12	Male	24	12	Clindamycin	120	mg	4	480	40	Treatment for Surgical disease	CAI	Empirical: pathogen determined	No Ventilation	2	2	0	0	0	0	0	0	0	0	0	0	0	0	0	0	0	0
3rd PPS/C7H12P151	3rd PPS	Americas	C7	H12	Female	36	13	Co-amoxiclav	227	mg	3	681	52.38461538461539	Bacterial LRTI	CAI	Empirical: awaiting culture	No Ventilation	1	1	1	0	0	0	0	0	0	0	0	0	0	1	0	0	0	0
3rd PPS/C7H10P22	3rd PPS	Americas	C7	H10	Female	108	26	Vancomycin	500	mg	3	1500	57.69230769230769	Other	CAI	Empirical: pathogen determined	No Ventilation	3	2	0	0	0	0	0	0	0	0	0	0	0	0	0	0	0	0
3rd PPS/C7H10P23	3rd PPS	Americas	C7	H10	Female	108	26	Ceftazidime	1300	mg	3	3900	150	Other	CAI	Empirical: pathogen determined	No Ventilation	3	2	0	0	0	0	0	0	0	0	0	0	0	0	0	0	0	0
3rd PPS/C7H10P24	3rd PPS	Americas	C7	H10	Male	24	8	Meropenem	136	mg	1	136	17	Other	HAI	Empirical: pathogen determined	No Ventilation	1	1	1	1	0	0	0	0	0	0	0	0	0	0	0	0	1	0
3rd PPS/C7H10P25	3rd PPS	Americas	C7	H10	Male	108	28	Ceftazidime	1800	mg	3	5400	192.85714285714286	Bacterial LRTI	CAI	Empirical: pathogen determined	No Ventilation	3	3	1	0	0	0	0	0	0	0	0	0	0	0	0	0	0	1
3rd PPS/C7H10P26	3rd PPS	Americas	C7	H10	Male	108	28	Amikacin	795	mg	1	795	28.392857142857142	Bacterial LRTI	CAI	Empirical: pathogen determined	No Ventilation	3	3	1	0	0	0	0	0	0	0	0	0	0	0	0	0	0	1
3rd PPS/C7H10P27	3rd PPS	Americas	C7	H10	Female	36	15	Clindamycin	113	mg	4	452	30.133333333333333	Bacterial LRTI	CAI	Targeted	Non-Invasive Ventilation	2	2	0	0	0	0	0	0	0	0	0	0	0	0	0	0	0	0
3rd PPS/C7H10P28	3rd PPS	Americas	C7	H10	Female	36	15	Vancomycin	180	mg	4	720	48	Bacterial LRTI	CAI	Targeted	Non-Invasive Ventilation	2	2	0	0	0	0	0	0	0	0	0	0	0	0	0	0	0	0
3rd PPS/C7H10P29	3rd PPS	Americas	C7	H10	Female	19	8	Cefepime	400	mg	3	1200	150	Bacterial LRTI	HAI	Empirical: pathogen determined	Invasive Ventilation	1	1	1	0	0	0	0	0	0	0	0	0	1	0	0	0	0	0
3rd PPS/C7H10P30	3rd PPS	Americas	C7	H10	Male	3	6	Ceftriaxone	300	mg	2	600	100	Central Nervous System (CNS) infections	CAI	Empirical: pathogen determined	Invasive Ventilation	2	2	0	0	0	0	0	0	0	0	0	0	0	0	0	0	0	0
3rd PPS/C7H10P31	3rd PPS	Americas	C7	H10	Male	3	6	Vancomycin	85	mg	4	340	56.666666666666664	Central Nervous System (CNS) infections	CAI	Empirical: pathogen determined	Invasive Ventilation	2	2	0	0	0	0	0	0	0	0	0	0	0	0	0	0	0	0
3rd PPS/C7H10P32	3rd PPS	Americas	C7	H10	Female	2	6	Cefepime	250	mg	2	500	83.33333333333333	GI tract infections	CAI	Empirical: pathogen determined	No Ventilation	2	2	1	0	1	0	0	1	0	0	0	0	0	0	0	0	0	0
3rd PPS/C7H10P33	3rd PPS	Americas	C7	H10	Female	2	6	Vancomycin	50	mg	4	200	33.333333333333336	GI tract infections	CAI	Empirical: pathogen determined	No Ventilation	2	2	1	0	1	0	0	1	0	0	0	0	0	0	0	0	0	0
3rd PPS/C7H14P1	3rd PPS	Americas	C7	H14	Male	2	3	Amikacin	50	mg	1	50	16.666666666666668	Sepsis	HAI	Empirical: pathogen determined	No Ventilation	2	2	2	0	0	0	0	0	0	0	0	0	0	0	0	1	0	1
3rd PPS/C7H8P99	3rd PPS	Americas	C7	H8	Male	5	8.600000381469727	Ceftriaxone	430	mg	2	860	99.9999955643057	Upper Respiratory Infections (URTI)	CAI	Empirical: awaiting culture	Invasive Ventilation	3	2	0	0	0	0	0	0	0	0	0	0	0	0	0	0	0	0
3rd PPS/C7H8P100	3rd PPS	Americas	C7	H8	Male	120	28	Ceftazidime	1400	mg	3	4200	150	Sepsis	HAI	Targeted	Invasive Ventilation	3	2	1	0	0	0	0	0	0	0	0	0	1	0	0	0	0	0
3rd PPS/C7H8P101	3rd PPS	Americas	C7	H8	Male	120	28	Vancomycin	420	mg	4	1680	60	Sepsis	HAI	Empirical: awaiting culture	Invasive Ventilation	3	2	1	0	0	0	0	0	0	0	0	0	1	0	0	0	0	0
3rd PPS/C7H8P102	3rd PPS	Americas	C7	H8	Female	20	11	Vancomycin	160	mg	4	640	58.18181818181818	Central Nervous System (CNS) infections	HAI	Targeted	No Ventilation	2	2	1	0	0	0	0	0	0	0	0	0	1	0	0	0	0	0
3rd PPS/C7H8P103	3rd PPS	Americas	C7	H8	Female	20	11	Ceftazidime	1100	mg	3	3300	300	Central Nervous System (CNS) infections	HAI	Targeted	No Ventilation	2	2	1	0	0	0	0	0	0	0	0	0	1	0	0	0	0	0
3rd PPS/C7H8P104	3rd PPS	Americas	C7	H8	Male	24	12	Ceftriaxone	600	mg	2	1200	100	Unknown	Unknown	Empirical: awaiting culture	No Ventilation	1	1	1	0	0	0	0	0	0	0	0	0	0	1	0	0	0	0
3rd PPS/C7H8P105	3rd PPS	Americas	C7	H8	Female	84	20	Amikacin	400	mg	1	400	20	Upper Respiratory Infections (URTI)	HAI	Targeted	No Ventilation	4	4	1	0	0	0	0	0	0	0	0	0	0	0	0	0	0	1
3rd PPS/C7H8P106	3rd PPS	Americas	C7	H8	Female	84	20	Vancomycin	200	mg	4	800	40	Upper Respiratory Infections (URTI)	HAI	Targeted	No Ventilation	4	4	1	0	0	0	0	0	0	0	0	0	0	0	0	0	0	1
3rd PPS/C7H8P107	3rd PPS	Americas	C7	H8	Female	84	20	Ceftazidime	1300	mg	3	3900	195	Upper Respiratory Infections (URTI)	HAI	Targeted	No Ventilation	4	4	1	0	0	0	0	0	0	0	0	0	0	0	0	0	0	1
3rd PPS/C7H8P108	3rd PPS	Americas	C7	H8	Female	1	7	Ceftriaxone	200	mg	2	400	57.142857142857146	Urinary Tract Infections (UTI)	CAI	Targeted	No Ventilation	1	1	1	0	0	0	0	0	0	0	0	0	0	0	0	0	1	0
3rd PPS/C7H8P109	3rd PPS	Americas	C7	H8	Female	132	36	Ceftriaxone	900	mg	2	1800	50	Upper Respiratory Infections (URTI)	Unknown	Empirical: awaiting culture	No Ventilation	1	1	0	0	0	0	0	0	0	0	0	0	0	0	0	0	0	0
3rd PPS/C7H8P110	3rd PPS	Americas	C7	H8	Female	3	2.740000009536743	Amikacin	40	mg	1	40	14.59854009517426	CRBSI	HAI	Targeted	Invasive Ventilation	1	1	1	0	0	0	0	1	0	0	0	0	0	0	0	0	0	0
3rd PPS/C7H8P111	3rd PPS	Americas	C7	H8	Male	14	4.800000190734863	Cefepime	240	mg	2	480	99.99999602635717	CRBSI	HAI	Empirical: awaiting culture	No Ventilation	1	1	1	0	0	0	0	0	0	0	0	0	1	0	0	0	0	0
3rd PPS/C7H8P112	3rd PPS	Americas	C7	H8	Male	11	9	Ceftriaxone	250	mg	2	500	55.55555555555556	Upper Respiratory Infections (URTI)	CAI	Empirical: awaiting culture	No Ventilation	1	1	1	0	0	0	0	0	0	0	0	0	0	0	0	0	0	1
3rd PPS/C7H8P113	3rd PPS	Americas	C7	H8	Male	120	42	Ceftriaxone	2000	mg	2	4000	95.23809523809524	Central Nervous System (CNS) infections	CAI	Empirical: awaiting culture	No Ventilation	1	1	0	0	0	0	0	0	0	0	0	0	0	0	0	0	0	0
3rd PPS/C7H8P114	3rd PPS	Americas	C7	H8	Female	2	6.199999809265137	Clindamycin	85	mg	3	255	41.12903352334526	Upper Respiratory Infections (URTI)	HAI	Empirical: awaiting culture	Invasive Ventilation	2	2	0	0	0	0	0	0	0	0	0	0	0	0	0	0	0	0
3rd PPS/C7H8P115	3rd PPS	Americas	C7	H8	Female	2	6.199999809265137	Ceftriaxone	310	mg	2	620	100.00000307636886	Upper Respiratory Infections (URTI)	HAI	Empirical: awaiting culture	Invasive Ventilation	2	2	0	0	0	0	0	0	0	0	0	0	0	0	0	0	0	0
3rd PPS/C7H8P116	3rd PPS	Americas	C7	H8	Male	9	4.900000095367432	Ceftriaxone	250	mg	2	500	102.04081434053666	Upper Respiratory Infections (URTI)	CAI	Empirical: awaiting culture	Invasive Ventilation	2	1	1	0	0	1	0	0	0	0	0	0	0	0	0	0	0	0
3rd PPS/C7H8P117	3rd PPS	Americas	C7	H8	Female	2	5.5	Meropenem	220	mg	3	660	120	Sepsis	HAI	Empirical: awaiting culture	Invasive Ventilation	2	2	0	0	0	0	0	0	0	0	0	0	0	0	0	0	0	0
3rd PPS/C7H8P118	3rd PPS	Americas	C7	H8	Female	2	5.5	Vancomycin	80	mg	4	320	58.18181818181818	Skin/Soft Tissue Infections (SSTI)	CAI	Targeted	Invasive Ventilation	2	2	0	0	0	0	0	0	0	0	0	0	0	0	0	0	0	0
3rd PPS/C7H8P119	3rd PPS	Americas	C7	H8	Male	2	3.5999999046325684	Ceftriaxone	200	mg	2	400	111.11111405455044	Upper Respiratory Infections (URTI)	CAI	Empirical: awaiting culture	Invasive Ventilation	2	2	1	0	0	0	0	0	1	0	0	0	0	0	0	0	0	0
3rd PPS/C7H11P27	3rd PPS	Americas	C7	H11	Male	6	5.300000190734863	Vancomycin	80	mg	4	320	60.37735631772325	Treatment for Surgical disease	CAI	Empirical: awaiting culture	Invasive Ventilation	2	2	1	0	0	1	0	0	0	0	0	0	0	0	0	0	0	0
3rd PPS/C7H11P28	3rd PPS	Americas	C7	H11	Male	6	5.300000190734863	Ceftriaxone	260	mg	2	520	98.11320401630027	Treatment for Surgical disease	CAI	Empirical: awaiting culture	Invasive Ventilation	2	2	1	0	0	1	0	0	0	0	0	0	0	0	0	0	0	0
3rd PPS/C7H11P29	3rd PPS	Americas	C7	H11	Female	72	16	Ceftriaxone	800	mg	2	1600	100	Bacterial LRTI	CAI	Empirical: awaiting culture	No Ventilation	1	1	1	0	0	0	0	0	1	0	0	0	0	0	0	0	0	0
3rd PPS/C7H11P30	3rd PPS	Americas	C7	H11	Male	120	28	Ceftriaxone	1400	mg	1	1400	50	Acute Otitis Media (AOM)	HAI	Empirical: awaiting culture	No Ventilation	1	1	1	0	0	0	0	0	1	0	0	0	0	0	0	0	0	0
3rd PPS/C7H11P31	3rd PPS	Americas	C7	H11	Female	36	15	Vancomycin	150	mg	1	150	10	Unknown	HAI	Empirical: awaiting culture	No Ventilation	2	2	2	0	0	0	0	0	0	0	0	0	0	0	0	0	2	0
3rd PPS/C7H11P32	3rd PPS	Americas	C7	H11	Female	36	15	Cefepime	750	mg	1	750	50	Unknown	HAI	Empirical: awaiting culture	No Ventilation	2	2	2	0	0	0	0	0	0	0	0	0	0	0	0	0	2	0
3rd PPS/C7H11P33	3rd PPS	Americas	C7	H11	Male	36	16.5	Ceftriaxone	800	mg	2	1600	96.96969696969697	Bacterial LRTI	CAI	Empirical: awaiting culture	No Ventilation	1	1	0	0	0	0	0	0	0	0	0	0	0	0	0	0	0	0
3rd PPS/C7H11P34	3rd PPS	Americas	C7	H11	Male	13	12.399999618530273	Meropenem	580	mg	3	1740	140.32258496200146	CRBSI	HAI	Targeted	No Ventilation	1	1	2	0	0	0	0	0	0	0	0	0	1	0	1	0	0	0
3rd PPS/C7H11P35	3rd PPS	Americas	C7	H11	Female	3	4.519999980926514	Amikacin	70	mg	1	70	15.486725729067667	Urinary Tract Infections (UTI)	HAI	Empirical: awaiting culture	Invasive Ventilation	2	2	1	0	0	0	0	0	0	0	0	0	1	0	0	0	0	0
3rd PPS/C7H11P36	3rd PPS	Americas	C7	H11	Male	24	12	Meropenem	480	mg	3	1440	120	GI tract infections	CAI	Empirical: awaiting culture	Invasive Ventilation	2	2	1	0	0	0	0	1	0	0	0	0	0	0	0	0	0	0
3rd PPS/C7H11P37	3rd PPS	Americas	C7	H11	Male	24	12	Teicoplanin	120	mg	3	360	30	GI tract infections	CAI	Empirical: awaiting culture	Invasive Ventilation	2	2	1	0	0	0	0	1	0	0	0	0	0	0	0	0	0	0
3rd PPS/C7H11P38	3rd PPS	Americas	C7	H11	Male	4	4	Vancomycin	60	mg	4	240	60	Bacterial LRTI	CAI	Empirical: pathogen determined	Invasive Ventilation	3	2	2	0	0	0	0	0	0	0	0	0	0	1	0	0	0	1
3rd PPS/C7H11P39	3rd PPS	Americas	C7	H11	Male	4	4	Cefepime	200	mg	3	600	150	Bacterial LRTI	CAI	Empirical: pathogen determined	Invasive Ventilation	3	2	2	0	0	0	0	0	0	0	0	0	0	1	0	0	0	1
3rd PPS/C7H11P40	3rd PPS	Americas	C7	H11	Male	132	33	Ceftriaxone	1000	mg	2	2000	60.60606060606061	Treatment for Surgical disease	HAI	Empirical: pathogen determined	No Ventilation	2	2	2	0	0	0	0	0	0	0	0	0	0	0	1	0	0	1
3rd PPS/C7H11P41	3rd PPS	Americas	C7	H11	Male	132	33	Clindamycin	330	mg	3	990	30	Treatment for Surgical disease	HAI	Empirical: pathogen determined	No Ventilation	2	2	2	0	0	0	0	0	0	0	0	0	0	0	1	0	0	1
3rd PPS/C7H11P42	3rd PPS	Americas	C7	H11	Male	132	32	Amikacin	480	mg	1	480	15	GI tract infections	HAI	Empirical: awaiting culture	Non-Invasive Ventilation	3	2	2	0	0	1	0	1	0	0	0	0	0	0	0	0	0	0
3rd PPS/C7H11P43	3rd PPS	Americas	C7	H11	Male	132	32	Meropenem	1300	mg	3	3900	121.875	GI tract infections	HAI	Empirical: awaiting culture	Non-Invasive Ventilation	3	2	2	0	0	1	0	1	0	0	0	0	0	0	0	0	0	0
3rd PPS/C7H11P44	3rd PPS	Americas	C7	H11	Female	2	2.799999952316284	Teicoplanin	30	mg	2	60	21.42857179349783	GI tract infections	CAI	Empirical: pathogen determined	Invasive Ventilation	3	2	2	1	0	0	0	1	0	0	0	0	0	0	0	0	1	0
3rd PPS/C7H11P45	3rd PPS	Americas	C7	H11	Female	2	2.799999952316284	Meropenem	60	mg	2	120	42.85714358699566	GI tract infections	CAI	Empirical: pathogen determined	Invasive Ventilation	3	2	2	1	0	0	0	1	0	0	0	0	0	0	0	0	1	0
3rd PPS/C7H11P46	3rd PPS	Americas	C7	H11	Female	2	3.865000009536743	Teicoplanin	35	mg	1	35	9.055627403270067	Treatment for Surgical disease	HAI	Empirical: pathogen determined	Invasive Ventilation	3	3	2	1	0	1	0	0	0	0	0	0	0	0	0	0	1	0
3rd PPS/C7H11P47	3rd PPS	Americas	C7	H11	Female	2	3.865000009536743	Meropenem	140	mg	3	420	108.6675288392408	Treatment for Surgical disease	HAI	Empirical: pathogen determined	Invasive Ventilation	3	3	2	1	0	1	0	0	0	0	0	0	0	0	0	0	1	0
3rd PPS/C7H11P48	3rd PPS	Americas	C7	H11	Male	4	3.200000047683716	Vancomycin	50	mg	4	200	62.49999906867744	Pyrexia of Unknown Origin (PUO)	HAI	Empirical: pathogen determined	Non-Invasive Ventilation	2	2	1	0	0	1	0	0	0	0	0	0	0	0	0	0	0	0
3rd PPS/C7H11P49	3rd PPS	Americas	C7	H11	Female	6	6.199999809265137	Meropenem	240	mg	3	720	116.1290358306219	Bacterial LRTI	HAI	Empirical: pathogen determined	Invasive Ventilation	6	3	1	0	0	0	0	0	1	0	0	0	0	0	0	0	0	0
4th PPS/C7H12P152	4th PPS	Americas	C7	H12	Male	36	11	Ampicillin	550	mg	4	2200	200	Upper Respiratory Infections (URTI)	CAI	Empirical: awaiting culture	No Ventilation	1	1	0	0	0	0	0	0	0	0	0	0	0	0	0	0	0	0
4th PPS/C7H12P153	4th PPS	Americas	C7	H12	Male	12	10	Vancomycin	100	mg	4	400	40	Sepsis	CAI	Empirical: pathogen determined	No Ventilation	2	2	1	0	0	0	0	0	0	1	0	0	0	0	0	0	0	0
4th PPS/C7H12P154	4th PPS	Americas	C7	H12	Male	12	10	Cefepime	500	mg	3	1500	150	Sepsis	CAI	Empirical: pathogen determined	No Ventilation	2	2	1	0	0	0	0	0	0	1	0	0	0	0	0	0	0	0
4th PPS/C7H12P155	4th PPS	Americas	C7	H12	Female	24	23	Clindamycin	230	mg	4	920	40	Bacterial LRTI	CAI	Empirical: pathogen determined	Non-Invasive Ventilation	1	1	1	0	0	0	0	0	0	0	0	0	0	0	1	0	0	0
4th PPS/C7H12P156	4th PPS	Americas	C7	H12	Female	9	10	Ciprofloxacin	100	mg	2	200	20	GI tract infections	CAI	Targeted	No Ventilation	1	1	2	0	0	0	0	0	0	0	0	0	0	0	0	1	0	1
4th PPS/C7H12P157	4th PPS	Americas	C7	H12	Female	9	4	Ceftriaxone	390	mg	1	390	97.5	GI tract infections	CAI	Empirical: pathogen determined	No Ventilation	1	1	1	0	0	0	0	0	0	0	0	0	0	0	1	0	0	0
4th PPS/C7H12P158	4th PPS	Americas	C7	H12	Male	17	10	Ceftriaxone	500	mg	2	1000	100	GI tract infections	CAI	Empirical: pathogen determined	No Ventilation	1	1	0	0	0	0	0	0	0	0	0	0	0	0	0	0	0	0
4th PPS/C7H12P159	4th PPS	Americas	C7	H12	Female	21	10	Ceftazidime	500	mg	3	1500	150	Bacterial LRTI	CAI	Empirical: pathogen determined	No Ventilation	3	3	1	0	0	0	0	0	0	0	0	0	0	0	0	0	0	1
4th PPS/C7H12P160	4th PPS	Americas	C7	H12	Female	21	10	Amikacin	225	mg	1	225	22.5	Bacterial LRTI	CAI	Empirical: pathogen determined	No Ventilation	3	3	1	0	0	0	0	0	0	0	0	0	0	0	0	0	0	1
4th PPS/C7H12P161	4th PPS	Americas	C7	H12	Male	60	22	Co-amoxiclav	657	mg	3	1971	89.5909090909091	Bacterial LRTI	CAI	Empirical: awaiting culture	No Ventilation	1	1	0	0	0	0	0	0	0	0	0	0	0	0	0	0	0	0
4th PPS/C7H12P162	4th PPS	Americas	C7	H12	Male	96	24	Ampicillin	1000	mg	4	4000	166.66666666666666	Bacterial LRTI	CAI	Empirical: awaiting culture	No Ventilation	1	1	0	0	0	0	0	0	0	0	0	0	0	0	0	0	0	0
4th PPS/C7H12P163	4th PPS	Americas	C7	H12	Female	108	42	Co-amoxiclav	700	mg	3	2100	50	Urinary Tract Infections (UTI)	CAI	Unknown	No Ventilation	1	1	1	1	0	0	0	0	0	0	0	0	0	0	0	0	1	0
4th PPS/C7H12P164	4th PPS	Americas	C7	H12	Female	3	6	Ampicillin	330	mg	4	1320	220	Bacterial LRTI	CAI	Empirical: awaiting culture	No Ventilation	1	1	0	0	0	0	0	0	0	0	0	0	0	0	0	0	0	0
4th PPS/C7H12P165	4th PPS	Americas	C7	H12	Male	8	9	Co-amoxiclav	150	mg	3	450	50	Bacterial LRTI	CAI	Empirical: awaiting culture	No Ventilation	1	1	0	0	0	0	0	0	0	0	0	0	0	0	0	0	0	0
4th PPS/C7H12P166	4th PPS	Americas	C7	H12	Male	36	14	Vancomycin	140	mg	4	560	40	Bacterial LRTI	CAI	Empirical: pathogen determined	No Ventilation	2	2	0	0	0	0	0	0	0	0	0	0	0	0	0	0	0	0
4th PPS/C7H12P167	4th PPS	Americas	C7	H12	Male	36	14	Pip-taz	1400	mg	4	5600	400	Bacterial LRTI	CAI	Empirical: pathogen determined	No Ventilation	2	2	0	0	0	0	0	0	0	0	0	0	0	0	0	0	0	0
4th PPS/C7H12P168	4th PPS	Americas	C7	H12	Male	36	15	Clindamycin	150	mg	4	600	40	Bacterial LRTI	CAI	Empirical: awaiting culture	No Ventilation	1	1	1	0	0	0	0	0	0	0	0	0	0	0	0	0	0	1
4th PPS/C7H12P169	4th PPS	Americas	C7	H12	Male	13	9	Cefepime	450	mg	3	1350	150	Bacterial LRTI	CAI	Empirical: pathogen determined	No Ventilation	2	2	1	0	0	0	0	0	0	0	0	0	1	0	0	0	0	0
4th PPS/C7H12P170	4th PPS	Americas	C7	H12	Male	13	9	Clindamycin	90	mg	4	360	40	Bacterial LRTI	CAI	Empirical: pathogen determined	No Ventilation	2	2	1	0	0	0	0	0	0	0	0	0	1	0	0	0	0	0
4th PPS/C7H12P171	4th PPS	Americas	C7	H12	Female	36	15	Cefuroxime	750	mg	3	2250	150	Bacterial LRTI	CAI	Empirical: pathogen determined	No Ventilation	2	2	0	0	0	0	0	0	0	0	0	0	0	0	0	0	0	0
4th PPS/C7H12P172	4th PPS	Americas	C7	H12	Female	16	10	Ampicillin	500	mg	4	2000	200	Bacterial LRTI	CAI	Empirical: awaiting culture	No Ventilation	1	1	0	0	0	0	0	0	0	0	0	0	0	0	0	0	0	0
4th PPS/C7H12P173	4th PPS	Americas	C7	H12	Male	7	5	Meropenem	200	mg	3	600	120	Bacterial LRTI	HAI	Empirical: pathogen determined	Invasive Ventilation	5	4	1	0	0	0	0	0	0	0	0	0	2	0	0	0	0	0
4th PPS/C7H12P174	4th PPS	Americas	C7	H12	Male	7	5	Vancomycin	75	mg	4	300	60	Bacterial LRTI	HAI	Empirical: pathogen determined	Invasive Ventilation	5	4	1	0	0	0	0	0	0	0	0	0	2	0	0	0	0	0
4th PPS/C7H12P175	4th PPS	Americas	C7	H12	Male	8	8	Ceftriaxone	400	mg	2	800	100	Central Nervous System (CNS) infections	CAI	Empirical: pathogen determined	No Ventilation	3	1	1	0	0	0	0	0	0	0	0	0	1	0	0	0	0	0
4th PPS/C7H12P176	4th PPS	Americas	C7	H12	Male	132	26	Pip-taz	2600	mg	4	10400	400	Bacterial LRTI	CAI	Empirical: pathogen determined	No Ventilation	1	1	1	0	0	0	0	0	0	0	0	0	1	0	0	0	0	0
4th PPS/C7H12P177	4th PPS	Americas	C7	H12	Male	60	18	Cefuroxime	900	mg	3	2700	150	Bacterial LRTI	CAI	Empirical: awaiting culture	No Ventilation	1	1	0	0	0	0	0	0	0	0	0	0	0	0	0	0	0	0
4th PPS/C7H12P178	4th PPS	Americas	C7	H12	Female	3	5	Amikacin	74	mg	1	74	14.8	Other	HAI	Empirical: pathogen determined	No Ventilation	1	1	1	0	0	0	0	0	0	0	0	0	0	1	0	0	0	0
4th PPS/C7H12P179	4th PPS	Americas	C7	H12	Female	120	32	Ampicillin	1000	mg	4	4000	125	Treatment for Surgical disease	CAI	Empirical: awaiting culture	No Ventilation	3	3	0	0	0	0	0	0	0	0	0	0	0	0	0	0	0	0
4th PPS/C7H12P180	4th PPS	Americas	C7	H12	Female	120	32	Gentamicin	190	mg	1	190	5.9375	Treatment for Surgical disease	CAI	Empirical: awaiting culture	No Ventilation	3	3	0	0	0	0	0	0	0	0	0	0	0	0	0	0	0	0
4th PPS/C7H12P181	4th PPS	Americas	C7	H12	Female	120	32	Clindamycin	320	mg	4	1280	40	Treatment for Surgical disease	CAI	Empirical: awaiting culture	No Ventilation	3	3	0	0	0	0	0	0	0	0	0	0	0	0	0	0	0	0
4th PPS/C7H12P182	4th PPS	Americas	C7	H12	Female	7	8	Ceftriaxone	790	mg	2	1580	197.5	Acute Otitis Media (AOM)	CAI	Empirical: awaiting culture	No Ventilation	1	1	0	0	0	0	0	0	0	0	0	0	0	0	0	0	0	0
4th PPS/C7H12P183	4th PPS	Americas	C7	H12	Male	48	26	Ampicillin	1300	mg	4	5200	200	Bacterial LRTI	CAI	Empirical: awaiting culture	No Ventilation	1	1	0	0	0	0	0	0	0	0	0	0	0	0	0	0	0	0
4th PPS/C7H12P184	4th PPS	Americas	C7	H12	Female	2	3	Ampicillin	165	mg	4	660	220	Central Nervous System (CNS) infections	CAI	Empirical: pathogen determined	No Ventilation	3	2	1	0	0	0	0	0	0	0	0	0	0	0	0	1	0	0
4th PPS/C7H12P185	4th PPS	Americas	C7	H12	Female	2	3	Cefepime	165	mg	3	495	165	Central Nervous System (CNS) infections	CAI	Empirical: pathogen determined	No Ventilation	3	2	1	0	0	0	0	0	0	0	0	0	0	0	0	1	0	0
4th PPS/C7H10P34	4th PPS	Americas	C7	H10	Male	20	5	Vancomycin	160	mg	2	320	64	Bacterial LRTI	HAI	Targeted	Invasive Ventilation	2	2	1	0	1	0	0	1	0	0	0	0	0	0	0	0	0	0
4th PPS/C7H10P35	4th PPS	Americas	C7	H10	Female	18	13	Cefepime	650	mg	3	1950	150	Bacterial LRTI	CAI	Empirical: awaiting culture	No Ventilation	4	2	1	0	0	0	0	0	0	1	0	0	0	0	0	0	0	0
4th PPS/C7H10P36	4th PPS	Americas	C7	H10	Female	18	13	Vancomycin	195	mg	4	780	60	Bacterial LRTI	CAI	Empirical: awaiting culture	No Ventilation	4	2	1	0	0	0	0	0	0	1	0	0	0	0	0	0	0	0
4th PPS/C7H10P37	4th PPS	Americas	C7	H10	Male	60	22	Teicoplanin	110	mg	2	220	10	Sepsis	CAI	Targeted	No Ventilation	1	1	0	0	0	0	0	0	0	0	0	0	0	0	0	0	0	0
4th PPS/C7H10P38	4th PPS	Americas	C7	H10	Male	84	24	Teicoplanin	240	mg	2	480	20	Febrile neutropenia/Fever	CAI	Empirical: pathogen determined	No Ventilation	3	3	1	0	0	0	0	0	1	0	0	0	0	0	0	0	0	0
4th PPS/C7H10P39	4th PPS	Americas	C7	H10	Male	84	24	Cefepime	1200	mg	3	3600	150	Febrile neutropenia/Fever	CAI	Empirical: pathogen determined	No Ventilation	3	3	1	0	0	0	0	0	1	0	0	0	0	0	0	0	0	0
4th PPS/C7H10P40	4th PPS	Americas	C7	H10	Male	3	4	Cefepime	180	mg	3	540	135	Bacterial LRTI	CAI	Empirical: pathogen determined	No Ventilation	2	2	1	0	0	0	0	0	1	0	0	0	0	0	0	0	0	0
4th PPS/C7H10P41	4th PPS	Americas	C7	H10	Female	10	6	Cefepime	150	mg	3	450	75	Bacterial LRTI	CAI	Empirical: pathogen determined	No Ventilation	1	1	1	0	1	0	0	1	0	0	0	0	0	0	0	0	0	0
4th PPS/C7H10P42	4th PPS	Americas	C7	H10	Female	120	19	Cefuroxime	950	mg	3	2850	150	Urinary Tract Infections (UTI)	CAI	Empirical: pathogen determined	No Ventilation	1	1	2	0	0	0	1	0	0	0	1	0	0	0	0	0	0	0
4th PPS/C7H10P43	4th PPS	Americas	C7	H10	Female	2	3	Gentamicin	20	mg	1	20	6.666666666666667	GI tract infections	CAI	Empirical: pathogen determined	Invasive Ventilation	2	2	1	0	0	1	0	0	0	0	0	0	0	0	0	0	0	0
4th PPS/C7H10P44	4th PPS	Americas	C7	H10	Female	2	3	Ampicillin	100	mg	4	400	133.33333333333334	GI tract infections	CAI	Empirical: pathogen determined	Invasive Ventilation	2	2	1	0	0	1	0	0	0	0	0	0	0	0	0	0	0	0
2nd PPS/C6H7P1	2nd PPS	Americas	C6	H7	Female	132	45	Gentamicin	225	mg	1	225	5	Treatment for Surgical disease	CAI	Empirical: awaiting culture	No Ventilation	2	2	0	0	0	0	0	0	0	0	0	0	0	0	0	0	0	0
2nd PPS/C6H7P2	2nd PPS	Americas	C6	H7	Female	132	45	Metronidazole	450	mg	3	1350	30	Treatment for Surgical disease	CAI	Empirical: awaiting culture	No Ventilation	2	2	0	0	0	0	0	0	0	0	0	0	0	0	0	0	0	0
2nd PPS/C6H7P3	2nd PPS	Americas	C6	H7	Female	132	40	Ampicillin	1000	mg	4	4000	100	Treatment for Surgical disease	CAI	Empirical: awaiting culture	No Ventilation	3	3	0	0	0	0	0	0	0	0	0	0	0	0	0	0	0	0
2nd PPS/C6H7P4	2nd PPS	Americas	C6	H7	Female	132	40	Gentamicin	200	mg	1	200	5	Treatment for Surgical disease	CAI	Empirical: awaiting culture	No Ventilation	3	3	0	0	0	0	0	0	0	0	0	0	0	0	0	0	0	0
2nd PPS/C6H7P5	2nd PPS	Americas	C6	H7	Female	132	40	Metronidazole	400	mg	3	1200	30	Treatment for Surgical disease	CAI	Empirical: awaiting culture	No Ventilation	3	3	0	0	0	0	0	0	0	0	0	0	0	0	0	0	0	0
2nd PPS/C6H7P6	2nd PPS	Americas	C6	H7	Male	60	26.799999237060547	Gentamicin	80	mg	1	80	2.9850747118444505	Treatment for Surgical disease	CAI	Empirical: awaiting culture	No Ventilation	3	3	0	0	0	0	0	0	0	0	0	0	0	0	0	0	0	0
2nd PPS/C6H7P7	2nd PPS	Americas	C6	H7	Female	12	9	Gentamicin	45	mg	1	45	5	Treatment for Surgical disease	CAI	Empirical: awaiting culture	No Ventilation	3	3	0	0	0	0	0	0	0	0	0	0	0	0	0	0	0	0
2nd PPS/C6H7P8	2nd PPS	Americas	C6	H7	Male	4	7	Ampicillin	350	mg	4	1400	200	Urinary Tract Infections (UTI)	CAI	Targeted	No Ventilation	1	1	0	0	0	0	0	0	0	0	0	0	0	0	0	0	0	0
2nd PPS/C6H7P9	2nd PPS	Americas	C6	H7	Male	4	7	Ampicillin	350	mg	4	1400	200	Urinary Tract Infections (UTI)	CAI	Targeted	No Ventilation	1	1	1	0	0	0	0	0	0	0	0	0	0	0	0	0	1	0
2nd PPS/C6H7P10	2nd PPS	Americas	C6	H7	Male	72	25	Gentamicin	125	mg	1	125	5	Treatment for Surgical disease	CAI	Empirical: awaiting culture	No Ventilation	3	3	0	0	0	0	0	0	0	0	0	0	0	0	0	0	0	0
2nd PPS/C6H7P11	2nd PPS	Americas	C6	H7	Male	72	25	Ampicillin	625	mg	3	1875	75	Treatment for Surgical disease	CAI	Empirical: awaiting culture	No Ventilation	3	3	0	0	0	0	0	0	0	0	0	0	0	0	0	0	0	0
2nd PPS/C6H7P12	2nd PPS	Americas	C6	H7	Male	72	25	Metronidazole	250	mg	3	750	30	Treatment for Surgical disease	CAI	Empirical: awaiting culture	No Ventilation	3	3	0	0	0	0	0	0	0	0	0	0	0	0	0	0	0	0
2nd PPS/C6H7P13	2nd PPS	Americas	C6	H7	Male	108	39	Metronidazole	390	mg	3	1170	30	Treatment for Surgical disease	CAI	Empirical: awaiting culture	No Ventilation	3	3	0	0	0	0	0	0	0	0	0	0	0	0	0	0	0	0
2nd PPS/C6H7P14	2nd PPS	Americas	C6	H7	Male	108	39	Ampicillin	900	mg	4	3600	92.3076923076923	Treatment for Surgical disease	CAI	Empirical: awaiting culture	No Ventilation	3	3	0	0	0	0	0	0	0	0	0	0	0	0	0	0	0	0
2nd PPS/C6H7P15	2nd PPS	Americas	C6	H7	Male	108	39	Gentamicin	195	mg	1	195	5	Treatment for Surgical disease	CAI	Empirical: awaiting culture	No Ventilation	3	3	0	0	0	0	0	0	0	0	0	0	0	0	0	0	0	0
2nd PPS/C6H7P16	2nd PPS	Americas	C6	H7	Female	10	10.100000381469727	Amikacin	150	mg	1	150	14.851484587584974	Urinary Tract Infections (UTI)	CAI	Targeted	No Ventilation	1	1	0	0	0	0	0	0	0	0	0	0	0	0	0	0	0	0
2nd PPS/C6H7P17	2nd PPS	Americas	C6	H7	Female	8	9.25	Amikacin	140	mg	1	140	15.135135135135135	Urinary Tract Infections (UTI)	CAI	Targeted	No Ventilation	1	1	0	0	0	0	0	0	0	0	0	0	0	0	0	0	0	0
2nd PPS/C6H7P18	2nd PPS	Americas	C6	H7	Female	2	7.099999904632568	Cefotaxime	270	mg	2	540	76.05633904976024	Urinary Tract Infections (UTI)	CAI	Targeted	No Ventilation	2	2	1	0	0	0	0	0	1	0	0	0	0	0	0	0	0	0
2nd PPS/C6H7P19	2nd PPS	Americas	C6	H7	Male	18	9.699999809265137	Ampicillin	500	mg	4	2000	206.18557106461614	Bacterial LRTI	CAI	Targeted	Non-Invasive Ventilation	2	2	0	0	0	0	0	0	0	0	0	0	0	0	0	0	0	0
2nd PPS/C6H7P20	2nd PPS	Americas	C6	H7	Female	9	6	Ceftazidime	300	mg	3	900	150	Bacterial LRTI	HAI	Targeted	Invasive Ventilation	3	2	1	0	0	0	0	0	0	0	0	0	0	0	0	1	0	0
2nd PPS/C6H7P21	2nd PPS	Americas	C6	H7	Female	9	6	Amikacin	90	mg	1	90	15	Bacterial LRTI	HAI	Targeted	Invasive Ventilation	3	2	1	0	0	0	0	0	0	0	0	0	0	0	0	1	0	0
2nd PPS/C6H7P22	2nd PPS	Americas	C6	H7	Male	1	5.75	Amikacin	90	mg	1	90	15.652173913043478	Urinary Tract Infections (UTI)	CAI	Targeted	No Ventilation	1	1	0	0	0	0	0	0	0	0	0	0	0	0	0	0	0	0
2nd PPS/C6H7P23	2nd PPS	Americas	C6	H7	Male	60	15	Gentamicin	100	mg	1	100	6.666666666666667	Bacterial LRTI	CAI	Targeted	No Ventilation	3	2	2	0	0	0	1	0	0	1	0	0	0	0	0	0	0	0
2nd PPS/C6H7P24	2nd PPS	Americas	C6	H7	Male	96	48	Ceftazidime	800	mg	4	3200	66.66666666666667	Bacterial LRTI	CAI	Targeted	No Ventilation	3	2	2	0	0	0	0	1	0	0	0	0	0	0	0	0	0	1
2nd PPS/C6H7P25	2nd PPS	Americas	C6	H7	Male	96	48	Amikacin	480	mg	1	480	10	Bacterial LRTI	CAI	Unknown	No Ventilation	3	2	2	0	0	0	0	1	0	0	0	0	0	0	0	0	0	1
1st PPS/C16H43P1	1st PPS	Europe	C16	H43	Female	1	4.599999904632568	Ampicillin	450	mg	2	900	195.6521779693143	Sepsis	CAI	Targeted	No Ventilation	1	1	0	0	0	0	0	0	0	0	0	0	0	0	0	0	0	0
1st PPS/C16H43P2	1st PPS	Europe	C16	H43	Female	60	18	Cefuroxime	600	mg	3	1800	100	Skin/Soft Tissue Infections (SSTI)	CAI	Targeted	No Ventilation	1	1	1	0	0	0	0	0	0	0	0	0	0	1	0	0	0	0
1st PPS/C16H43P3	1st PPS	Europe	C16	H43	Male	6	7.400000095367432	Meropenem	100	mg	2	200	27.02702667871647	Other	HAI	Empirical: awaiting culture	Invasive Ventilation	6	4	3	1	0	1	0	0	0	0	0	0	0	0	1	0	2	0
1st PPS/C16H43P4	1st PPS	Europe	C16	H43	Male	60	13	Cefuroxime	440	mg	3	1320	101.53846153846153	Bacterial LRTI	CAI	Empirical: awaiting culture	No Ventilation	1	1	3	0	0	0	0	0	0	0	1	0	2	0	0	0	0	0
1st PPS/C16H43P5	1st PPS	Europe	C16	H43	Male	36	14.100000381469727	Vancomycin	150	mg	4	600	42.55319033810256	Pyrexia of Unknown Origin (PUO)	HAI	Empirical: pathogen determined	No Ventilation	2	2	2	0	0	1	0	0	0	0	0	0	1	0	0	0	0	0
1st PPS/C16H43P6	1st PPS	Europe	C16	H43	Male	36	14.100000381469727	Cefuroxime	500	mg	3	1500	106.38297584525641	Pyrexia of Unknown Origin (PUO)	HAI	Empirical: pathogen determined	No Ventilation	2	2	2	0	0	1	0	0	0	0	0	0	1	0	0	0	0	0
1st PPS/C16H43P7	1st PPS	Europe	C16	H43	Male	24	15.5	Cefuroxime	1000	mg	3	3000	193.5483870967742	Febrile neutropenia/Fever	CAI	Empirical: awaiting culture	No Ventilation	3	3	3	0	0	0	0	0	1	0	0	0	0	0	2	0	0	0
1st PPS/C16H43P8	1st PPS	Europe	C16	H43	Female	96	18.200000762939453	Pip-taz	1360	mg	4	5440	298.90108637124	Febrile neutropenia/Fever	HAI	Empirical: pathogen determined	No Ventilation	3	3	3	0	0	1	0	0	0	1	1	0	0	0	0	0	0	0
1st PPS/C16H43P9	1st PPS	Europe	C16	H43	Male	60	19	Cefuroxime	600	mg	3	1800	94.73684210526316	Other	HAI	Targeted	No Ventilation	1	1	2	0	0	1	0	0	0	0	0	0	0	0	0	0	0	1
1st PPS/C16H43P10	1st PPS	Europe	C16	H43	Female	108	23.100000381469727	Meropenem	960	mg	3	2880	124.67532261645623	Febrile neutropenia/Fever	HAI	Empirical: pathogen determined	No Ventilation	4	3	1	0	0	0	0	0	1	0	0	0	0	0	0	0	0	0
1st PPS/C16H43P11	1st PPS	Europe	C16	H43	Male	12	11.199999809265137	Cefuroxime	300	mg	1	300	26.78571474187229	CRBSI	HAI	Empirical: pathogen determined	No Ventilation	1	1	2	1	1	0	0	2	0	0	0	0	0	0	0	0	3	0
2nd PPS/C16H43P12	2nd PPS	Europe	C16	H43	Female	24	13.699999809265137	Meropenem	550	mg	3	1650	120.43795788114726	Treatment for Surgical disease	HAI	Empirical: awaiting culture	Invasive Ventilation	1	1	0	0	0	0	0	0	0	0	0	0	0	0	0	0	0	0
2nd PPS/C16H43P13	2nd PPS	Europe	C16	H43	Female	2	5	Cefuroxime	180	mg	3	540	108	Urinary Tract Infections (UTI)	CAI	Empirical: no culture	No Ventilation	1	1	0	0	0	0	0	0	0	0	0	0	0	0	0	0	0	0
2nd PPS/C16H43P14	2nd PPS	Europe	C16	H43	Male	23	13	Cefuroxime	440	mg	3	1320	101.53846153846153	Other	CAI	Empirical: pathogen determined	No Ventilation	3	2	1	0	0	0	0	0	1	0	0	0	0	0	0	0	0	0
2nd PPS/C16H43P15	2nd PPS	Europe	C16	H43	Male	48	18.200000762939453	Teicoplanin	150	mg	1	150	8.24175789626581	Febrile neutropenia/Fever	HAI	Empirical: pathogen determined	No Ventilation	5	4	1	0	0	0	0	0	1	0	0	0	0	0	0	0	0	0
2nd PPS/C16H43P16	2nd PPS	Europe	C16	H43	Male	48	18.200000762939453	Pip-taz	1500	mg	4	6000	329.6703158506324	Febrile neutropenia/Fever	HAI	Empirical: pathogen determined	No Ventilation	5	4	1	0	0	0	0	0	1	0	0	0	0	0	0	0	0	0
2nd PPS/C16H43P17	2nd PPS	Europe	C16	H43	Male	24	15.5	Meropenem	500	mg	3	1500	96.7741935483871	Febrile neutropenia/Fever	HAI	Empirical: awaiting culture	No Ventilation	5	3	2	0	0	0	0	0	1	0	0	0	0	0	1	0	0	0
2nd PPS/C16H43P18	2nd PPS	Europe	C16	H43	Female	108	24.5	Teicoplanin	200	mg	1	200	8.16326530612245	Febrile neutropenia/Fever	HAI	Empirical: pathogen determined	No Ventilation	4	3	1	0	0	0	0	0	1	0	0	0	0	0	0	0	0	0
2nd PPS/C16H43P19	2nd PPS	Europe	C16	H43	Female	108	24.5	Meropenem	840	mg	3	2520	102.85714285714286	Febrile neutropenia/Fever	HAI	Empirical: pathogen determined	No Ventilation	4	3	1	0	0	0	0	0	1	0	0	0	0	0	0	0	0	0
3rd PPS/C16H43P20	3rd PPS	Europe	C16	H43	Female	4	2.5999999046325684	Cefuroxime	80	mg	3	240	92.30769569351841	Treatment for Surgical disease	HAI	Empirical: awaiting culture	Invasive Ventilation	1	1	3	0	0	0	0	1	0	0	0	0	0	0	0	1	0	1
3rd PPS/C16H43P21	3rd PPS	Europe	C16	H43	Male	2	5.900000095367432	Cefuroxime	200	mg	3	600	101.6949136104436	Urinary Tract Infections (UTI)	CAI	Targeted	No Ventilation	1	1	0	0	0	0	0	0	0	0	0	0	0	0	0	0	0	0
3rd PPS/C16H43P22	3rd PPS	Europe	C16	H43	Female	108	30	Cefuroxime	1000	mg	3	3000	100	Urinary Tract Infections (UTI)	CAI	Targeted	No Ventilation	1	1	2	0	0	0	0	0	1	0	0	0	0	0	1	0	0	0
3rd PPS/C16H43P23	3rd PPS	Europe	C16	H43	Male	132	35.400001525878906	Meropenem	300	mg	3	900	25.4237277176969	Skin/Soft Tissue Infections (SSTI)	CAI	Empirical: awaiting culture	No Ventilation	3	2	0	0	0	0	0	0	0	0	0	0	0	0	0	0	0	0
3rd PPS/C16H43P24	3rd PPS	Europe	C16	H43	Male	132	35.400001525878906	Vancomycin	350	mg	4	1400	39.548020894195176	Skin/Soft Tissue Infections (SSTI)	CAI	Empirical: awaiting culture	No Ventilation	3	2	0	0	0	0	0	0	0	0	0	0	0	0	0	0	0	0
3rd PPS/C16H43P25	3rd PPS	Europe	C16	H43	Male	72	22	Cefuroxime	730	mg	3	2190	99.54545454545455	Other	CAI	Targeted	No Ventilation	1	1	0	0	0	0	0	0	0	0	0	0	0	0	0	0	0	0
3rd PPS/C16H43P26	3rd PPS	Europe	C16	H43	Male	120	53	Cefuroxime	1500	mg	3	4500	84.90566037735849	Treatment for Surgical disease	CAI	Empirical: awaiting culture	No Ventilation	2	2	0	0	0	0	0	0	0	0	0	0	0	0	0	0	0	0
3rd PPS/C16H43P27	3rd PPS	Europe	C16	H43	Male	120	53	Metronidazole	500	mg	3	1500	28.30188679245283	Treatment for Surgical disease	CAI	Empirical: awaiting culture	No Ventilation	2	2	0	0	0	0	0	0	0	0	0	0	0	0	0	0	0	0
3rd PPS/C16H43P28	3rd PPS	Europe	C16	H43	Male	2	4.860000133514404	Cefuroxime	150	mg	3	450	92.59259004887973	Viral LRTI	CAI	Empirical: pathogen determined	Non-Invasive Ventilation	1	1	2	0	0	1	0	0	0	0	0	0	0	1	0	0	0	0
3rd PPS/C16H43P29	3rd PPS	Europe	C16	H43	Female	60	17.799999237060547	Meropenem	700	mg	3	2100	117.97753314661318	Pyrexia of Unknown Origin (PUO)	HAI	Empirical: awaiting culture	No Ventilation	3	3	1	0	0	0	0	0	0	1	0	0	0	0	0	0	0	0
3rd PPS/C16H43P30	3rd PPS	Europe	C16	H43	Female	60	16.299999237060547	Cefuroxime	600	mg	3	1800	110.42945302153291	Febrile neutropenia/Fever	HAI	Empirical: pathogen determined	No Ventilation	5	3	3	0	0	1	0	0	1	0	0	0	0	1	0	0	0	0
3rd PPS/C16H43P31	3rd PPS	Europe	C16	H43	Male	8	11.199999809265137	Pip-taz	770	mg	4	3080	275.0000046832222	Pyrexia of Unknown Origin (PUO)	HAI	Empirical: awaiting culture	No Ventilation	3	1	2	0	0	0	0	0	1	0	0	0	0	0	1	0	0	0
3rd PPS/C16H43P32	3rd PPS	Europe	C16	H43	Female	120	22	Meropenem	880	mg	3	2640	120	Bacterial LRTI	HAI	Empirical: awaiting culture	No Ventilation	5	3	1	0	0	0	0	0	1	0	0	0	0	0	0	0	0	0
3rd PPS/C16H43P33	3rd PPS	Europe	C16	H43	Male	1	4	Cefuroxime	140	mg	3	420	105	Pyrexia of Unknown Origin (PUO)	CAI	Empirical: pathogen determined	No Ventilation	1	1	0	0	0	0	0	0	0	0	0	0	0	0	0	0	0	0
3rd PPS/C16H43P34	3rd PPS	Europe	C16	H43	Male	48	22	Meropenem	800	mg	3	2400	109.0909090909091	Sepsis	CAI	Empirical: awaiting culture	No Ventilation	3	2	2	0	1	0	0	1	0	1	0	0	0	0	0	0	0	0
4th PPS/C16H43P35	4th PPS	Europe	C16	H43	Female	20	9.899999618530273	Cefuroxime	320	mg	3	960	96.96970070616214	Febrile neutropenia/Fever	HAI	Empirical: pathogen determined	No Ventilation	1	1	1	0	0	0	0	0	0	1	0	0	0	0	0	0	0	0
4th PPS/C16H43P36	4th PPS	Europe	C16	H43	Female	9	9	Clindamycin	80	mg	4	320	35.55555555555556	Bacterial LRTI	CAI	Empirical: pathogen determined	No Ventilation	2	2	0	0	0	0	0	0	0	0	0	0	0	0	0	0	0	0
4th PPS/C16H43P37	4th PPS	Europe	C16	H43	Female	9	9	Cefuroxime	280	mg	3	840	93.33333333333333	Bacterial LRTI	CAI	Empirical: pathogen determined	No Ventilation	2	2	0	0	0	0	0	0	0	0	0	0	0	0	0	0	0	0
4th PPS/C16H43P38	4th PPS	Europe	C16	H43	Female	2	6	Cefuroxime	195	mg	3	585	97.5	Bacterial LRTI	CAI	Empirical: awaiting culture	Non-Invasive Ventilation	1	1	1	0	0	0	0	0	0	0	0	0	0	1	0	0	0	0
4th PPS/C16H43P39	4th PPS	Europe	C16	H43	Male	132	39.599998474121094	Pip-taz	4000	mg	3	12000	303.0303147067567	Febrile neutropenia/Fever	HAI	Empirical: awaiting culture	No Ventilation	5	3	1	0	0	0	0	0	0	1	0	0	0	0	0	0	0	0
4th PPS/C16H43P40	4th PPS	Europe	C16	H43	Female	36	13.399999618530273	Pip-taz	1000	mg	4	4000	298.507471184445	Febrile neutropenia/Fever	HAI	Empirical: pathogen determined	No Ventilation	3	3	1	0	0	0	0	0	0	1	0	0	0	0	0	0	0	0
4th PPS/C16H43P41	4th PPS	Europe	C16	H43	Female	36	17.600000381469727	Pip-taz	1300	mg	4	5200	295.4545390507408	Febrile neutropenia/Fever	CAI	Empirical: awaiting culture	No Ventilation	1	1	1	0	0	0	0	0	0	1	0	0	0	0	0	0	0	0
4th PPS/C16H43P42	4th PPS	Europe	C16	H43	Male	2	5	Cefuroxime	165	mg	3	495	99	Other	CAI	Empirical: awaiting culture	Invasive Ventilation	1	1	1	0	0	1	0	0	0	0	0	0	0	0	0	0	0	0
4th PPS/C16H43P43	4th PPS	Europe	C16	H43	Female	48	17	Vancomycin	230	mg	3	690	40.588235294117645	Treatment for Surgical disease	HAI	Empirical: awaiting culture	No Ventilation	2	2	0	0	0	0	0	0	0	0	0	0	0	0	0	0	0	0
4th PPS/C16H43P44	4th PPS	Europe	C16	H43	Female	48	17	Pip-taz	1500	mg	3	4500	264.70588235294116	Treatment for Surgical disease	HAI	Empirical: awaiting culture	No Ventilation	2	2	0	0	0	0	0	0	0	0	0	0	0	0	0	0	0	0
4th PPS/C16H43P45	4th PPS	Europe	C16	H43	Female	13	9.300000190734863	Vancomycin	90	mg	4	360	38.70967662545324	CRBSI	HAI	Empirical: pathogen determined	Non-Invasive Ventilation	2	2	0	0	0	0	0	0	0	0	0	0	0	0	0	0	0	0
4th PPS/C16H43P46	4th PPS	Europe	C16	H43	Female	13	9.300000190734863	Pip-taz	800	mg	4	3200	344.08601444847324	CRBSI	HAI	Empirical: pathogen determined	Non-Invasive Ventilation	2	2	0	0	0	0	0	0	0	0	0	0	0	0	0	0	0	0
4th PPS/C16H43P47	4th PPS	Europe	C16	H43	Male	120	28	Cefuroxime	960	mg	3	2880	102.85714285714286	Other	HAI	Empirical: pathogen determined	No Ventilation	1	1	0	0	0	0	0	0	0	0	0	0	0	0	0	0	0	0
4th PPS/C16H43P48	4th PPS	Europe	C16	H43	Male	60	20.5	Clindamycin	115	mg	4	460	22.4390243902439	Skin/Soft Tissue Infections (SSTI)	CAI	Empirical: pathogen determined	No Ventilation	2	2	1	0	0	0	0	0	0	0	0	0	1	0	0	0	0	0
4th PPS/C16H43P49	4th PPS	Europe	C16	H43	Male	20	14.399999618530273	Cefuroxime	500	mg	3	1500	104.16666942614104	Unknown	HAI	Empirical: awaiting culture	No Ventilation	1	1	1	0	0	0	0	0	0	1	0	0	0	0	0	0	0	0
4th PPS/C16H43P50	4th PPS	Europe	C16	H43	Female	24	15.199999809265137	Cefuroxime	500	mg	3	1500	98.68421176463946	Sepsis	HAI	Empirical: pathogen determined	No Ventilation	1	1	1	0	0	1	0	0	0	0	0	0	0	0	0	0	0	0
4th PPS/C16H43P51	4th PPS	Europe	C16	H43	Male	36	14.699999809265137	Clindamycin	150	mg	4	600	40.816327060210654	Unknown	HAI	Empirical: pathogen determined	No Ventilation	1	1	1	0	0	1	0	0	0	0	0	0	0	0	0	0	0	0
2nd PPS/C1H1P1	2nd PPS	Africa	C1	H1	Female	15	10.300000190734863	Ceftriaxone	800	mg	1	800	77.66990147433417	Joint/Bone Infections	CAI	Empirical: awaiting culture	No Ventilation	2	1	0	0	0	0	0	0	0	0	0	0	0	0	0	0	0	0
2nd PPS/C1H1P2	2nd PPS	Africa	C1	H1	Male	108	21.399999618530273	Ampicillin	500	mg	4	2000	93.45794559118583	Skin/Soft Tissue Infections (SSTI)	CAI	Empirical: awaiting culture	No Ventilation	2	2	0	0	0	0	0	0	0	0	0	0	0	0	0	0	0	0
2nd PPS/C1H1P3	2nd PPS	Africa	C1	H1	Female	24	9.899999618530273	Ampicillin	250	mg	4	1000	101.01010490225224	Sepsis	CAI	Empirical: pathogen determined	No Ventilation	2	2	1	0	0	0	0	0	0	0	1	0	0	0	0	0	0	0
2nd PPS/C1H1P4	2nd PPS	Africa	C1	H1	Female	24	9.899999618530273	Gentamicin	75	mg	1	75	7.5757578676689175	Sepsis	CAI	Empirical: pathogen determined	No Ventilation	2	2	1	0	0	0	0	0	0	0	1	0	0	0	0	0	0	0
2nd PPS/C10H18P1	2nd PPS	Europe	C10	H18	Male	14	8.350000381469727	Pip-taz	600	mg	3	1800	215.56885242718667	Upper Respiratory Infections (URTI)	HAI	Unknown	No Ventilation	3	3	1	0	0	1	0	0	0	0	0	0	0	0	0	0	0	0
2nd PPS/C10H18P2	2nd PPS	Europe	C10	H18	Male	14	8.350000381469727	Vancomycin	130	mg	3	390	46.706584692557115	Febrile neutropenia/Fever	HAI	Empirical: awaiting culture	No Ventilation	3	3	1	0	0	1	0	0	0	0	0	0	0	0	0	0	0	0
2nd PPS/C10H18P3	2nd PPS	Europe	C10	H18	Female	1	3.680000066757202	Cefotaxime	200	mg	3	600	163.04347530317222	Sepsis	HAI	Targeted	No Ventilation	2	2	1	0	0	1	0	0	0	0	0	0	0	0	0	0	0	0
2nd PPS/C10H18P4	2nd PPS	Europe	C10	H18	Male	3	4.119999885559082	Vancomycin	80	mg	2	160	38.83495253502612	Sepsis	HAI	Targeted	No Ventilation	2	2	2	0	0	1	1	0	0	0	0	0	0	0	0	0	0	0
2nd PPS/C10H18P5	2nd PPS	Europe	C10	H18	Female	48	16	Vancomycin	100	mg	2	200	12.5	Sepsis	HAI	Empirical: awaiting culture	No Ventilation	3	2	3	0	0	1	0	1	0	0	0	0	0	1	0	0	0	0
2nd PPS/C10H18P6	2nd PPS	Europe	C10	H18	Female	48	16	Meropenem	400	mg	2	800	50	Sepsis	Unknown	Empirical: awaiting culture	No Ventilation	3	2	3	0	0	1	0	1	0	0	0	0	0	1	0	0	0	0
2nd PPS/C10H18P7	2nd PPS	Europe	C10	H18	Female	120	40.70000076293945	Pip-taz	2000	mg	3	6000	147.42014465669178	Treatment for Surgical disease	HAI	Empirical: awaiting culture	No Ventilation	3	3	1	0	0	0	0	0	0	1	0	0	0	0	0	0	0	0
2nd PPS/C10H18P8	2nd PPS	Europe	C10	H18	Male	96	20.5	Cefuroxime	650	mg	3	1950	95.1219512195122	Skin/Soft Tissue Infections (SSTI)	HAI	Empirical: awaiting culture	No Ventilation	1	1	2	0	0	0	0	0	0	0	0	0	2	0	0	0	1	0
2nd PPS/C10H18P9	2nd PPS	Europe	C10	H18	Male	48	17.600000381469727	Teicoplanin	160	mg	1	160	9.090908893868948	Febrile neutropenia/Fever	Unknown	Empirical: pathogen determined	No Ventilation	5	4	2	0	0	0	0	0	1	1	0	0	0	0	0	0	0	0
2nd PPS/C10H18P10	2nd PPS	Europe	C10	H18	Male	48	17.600000381469727	Meropenem	600	mg	3	1800	102.27272505602565	Febrile neutropenia/Fever	Unknown	Empirical: pathogen determined	No Ventilation	5	4	2	0	0	0	0	0	1	1	0	0	0	0	0	0	0	0
2nd PPS/C10H18P11	2nd PPS	Europe	C10	H18	Male	48	17.600000381469727	Amikacin	220	mg	1	220	12.499999729069803	Febrile neutropenia/Fever	Unknown	Empirical: pathogen determined	No Ventilation	5	4	2	0	0	0	0	0	1	1	0	0	0	0	0	0	0	0
2nd PPS/C10H18P12	2nd PPS	Europe	C10	H18	Male	96	26	Pip-taz	2200	mg	3	6600	253.84615384615384	Febrile neutropenia/Fever	Unknown	Empirical: pathogen determined	No Ventilation	5	3	1	0	0	0	0	0	0	1	0	0	0	0	0	0	0	0
2nd PPS/C10H18P13	2nd PPS	Europe	C10	H18	Male	96	26	Teicoplanin	200	mg	1	200	7.6923076923076925	Febrile neutropenia/Fever	Unknown	Empirical: pathogen determined	No Ventilation	5	3	1	0	0	0	0	0	0	1	0	0	0	0	0	0	0	0
2nd PPS/C10H18P14	2nd PPS	Europe	C10	H18	Female	96	36.29999923706055	Teicoplanin	350	mg	1	350	9.641873480886106	Febrile neutropenia/Fever	Unknown	Empirical: awaiting culture	No Ventilation	5	3	1	0	0	0	0	0	1	0	0	0	0	0	0	0	0	0
2nd PPS/C10H18P15	2nd PPS	Europe	C10	H18	Female	96	36.29999923706055	Pip-taz	2800	mg	3	8400	231.40496354126657	Febrile neutropenia/Fever	Unknown	Empirical: awaiting culture	No Ventilation	5	3	1	0	0	0	0	0	1	0	0	0	0	0	0	0	0	0
2nd PPS/C10H18P16	2nd PPS	Europe	C10	H18	Male	60	18.399999618530273	Teicoplanin	150	mg	1	150	8.152174082054762	Febrile neutropenia/Fever	Unknown	Empirical: no culture	No Ventilation	5	3	1	0	0	0	0	0	0	1	0	0	0	0	0	0	0	0
2nd PPS/C10H18P17	2nd PPS	Europe	C10	H18	Male	60	18.399999618530273	Meropenem	600	mg	3	1800	97.82608898465715	Febrile neutropenia/Fever	Unknown	Empirical: awaiting culture	No Ventilation	5	3	1	0	0	0	0	0	0	1	0	0	0	0	0	0	0	0
2nd PPS/C10H18P18	2nd PPS	Europe	C10	H18	Male	132	22.399999618530273	Teicoplanin	200	mg	1	200	8.928571580624096	Febrile neutropenia/Fever	HAI	Empirical: awaiting culture	No Ventilation	7	4	1	0	0	0	0	0	0	1	0	0	0	0	0	0	0	0
2nd PPS/C10H18P19	2nd PPS	Europe	C10	H18	Male	132	22.399999618530273	Ceftriaxone	2000	mg	1	2000	89.28571580624096	Central Nervous System (CNS) infections	HAI	Empirical: awaiting culture	No Ventilation	7	4	1	0	0	0	0	0	0	1	0	0	0	0	0	0	0	0
2nd PPS/C10H18P20	2nd PPS	Europe	C10	H18	Male	96	38.400001525878906	Pip-taz	3100	mg	3	9300	242.18749037633378	Febrile neutropenia/Fever	CAI	Empirical: awaiting culture	No Ventilation	4	3	1	0	0	0	0	0	0	1	0	0	0	0	0	0	0	0
2nd PPS/C10H18P21	2nd PPS	Europe	C10	H18	Male	96	38.400001525878906	Gentamicin	150	mg	1	150	3.9062498447795773	Febrile neutropenia/Fever	CAI	Empirical: awaiting culture	No Ventilation	4	3	1	0	0	0	0	0	0	1	0	0	0	0	0	0	0	0
2nd PPS/C10H18P22	2nd PPS	Europe	C10	H18	Male	21	11	Gentamicin	45	mg	1	45	4.090909090909091	Febrile neutropenia/Fever	HAI	Empirical: awaiting culture	No Ventilation	4	3	1	0	0	0	0	0	0	1	0	0	0	0	0	0	0	0
2nd PPS/C10H18P23	2nd PPS	Europe	C10	H18	Male	21	11	Pip-taz	900	mg	3	2700	245.45454545454547	Febrile neutropenia/Fever	HAI	Empirical: awaiting culture	No Ventilation	4	3	1	0	0	0	0	0	0	1	0	0	0	0	0	0	0	0
2nd PPS/C10H18P24	2nd PPS	Europe	C10	H18	Female	132	40	Pip-taz	2500	mg	3	7500	187.5	Bacterial LRTI	CAI	Empirical: awaiting culture	No Ventilation	3	3	0	0	0	0	0	0	0	0	0	0	0	0	0	0	0	0
2nd PPS/C10H18P25	2nd PPS	Europe	C10	H18	Female	132	40	Gentamicin	200	mg	1	200	5	Bacterial LRTI	CAI	Empirical: awaiting culture	No Ventilation	3	3	0	0	0	0	0	0	0	0	0	0	0	0	0	0	0	0
2nd PPS/C10H18P26	2nd PPS	Europe	C10	H18	Male	132	45	Pip-taz	3000	mg	3	9000	200	Bacterial LRTI	CAI	Empirical: awaiting culture	Invasive Ventilation	2	2	1	0	0	0	0	0	1	0	0	0	0	0	0	0	0	0
2nd PPS/C10H18P27	2nd PPS	Europe	C10	H18	Male	132	45	Cefotaxime	3000	mg	3	9000	200	Sepsis	CAI	Empirical: awaiting culture	Invasive Ventilation	2	2	1	0	0	0	0	0	1	0	0	0	0	0	0	0	0	0
2nd PPS/C10H20P1	2nd PPS	Europe	C10	H20	Male	4	7	Meropenem	120	mg	3	360	51.42857142857143	Febrile neutropenia/Fever	HAI	Empirical: awaiting culture	No Ventilation	4	3	1	0	0	0	0	0	0	1	0	0	0	0	0	0	0	0
2nd PPS/C10H20P2	2nd PPS	Europe	C10	H20	Male	4	7	Clindamycin	100	mg	3	300	42.857142857142854	Febrile neutropenia/Fever	HAI	Empirical: awaiting culture	No Ventilation	4	3	1	0	0	0	0	0	0	1	0	0	0	0	0	0	0	0
2nd PPS/C10H20P3	2nd PPS	Europe	C10	H20	Male	11	5.199999809265137	Vancomycin	50	mg	4	200	38.46153987229933	CRBSI	HAI	Empirical: awaiting culture	No Ventilation	1	1	1	0	0	1	0	0	0	0	0	0	0	0	0	0	0	0
2nd PPS/C10H20P4	2nd PPS	Europe	C10	H20	Male	6	8	Meropenem	150	mg	3	450	56.25	CRBSI	HAI	Empirical: no culture	No Ventilation	2	1	1	0	0	0	0	1	0	0	0	0	0	0	0	0	0	0
2nd PPS/C10H20P5	2nd PPS	Europe	C10	H20	Male	72	24.399999618530273	Pip-taz	2220	mg	3	6660	272.95082393944574	Febrile neutropenia/Fever	HAI	Empirical: awaiting culture	No Ventilation	3	2	1	0	0	0	0	0	0	1	0	0	0	0	0	0	0	0
2nd PPS/C10H20P6	2nd PPS	Europe	C10	H20	Male	120	19	Pip-taz	1800	mg	3	5400	284.2105263157895	Febrile neutropenia/Fever	HAI	Empirical: awaiting culture	No Ventilation	5	3	1	0	0	0	0	0	0	1	0	0	0	0	0	0	0	0
2nd PPS/C10H20P7	2nd PPS	Europe	C10	H20	Male	120	19	Vancomycin	270	mg	3	810	42.63157894736842	Febrile neutropenia/Fever	HAI	Empirical: awaiting culture	No Ventilation	5	3	1	0	0	0	0	0	0	1	0	0	0	0	0	0	0	0
2nd PPS/C10H20P8	2nd PPS	Europe	C10	H20	Female	60	22	Cefuroxime	750	mg	3	2250	102.27272727272727	Skin/Soft Tissue Infections (SSTI)	CAI	Targeted	No Ventilation	1	1	0	0	0	0	0	0	0	0	0	0	0	0	0	0	0	0
2nd PPS/C10H20P9	2nd PPS	Europe	C10	H20	Female	132	19.275	Pip-taz	700	mg	3	2100	108.94941634241246	Skin/Soft Tissue Infections (SSTI)	HAI	Empirical: awaiting culture	No Ventilation	5	3	1	0	0	0	0	0	0	1	0	0	0	0	0	0	0	0
2nd PPS/C10H20P10	2nd PPS	Europe	C10	H20	Female	9	9.039999961853027	Pip-taz	450	mg	3	1350	149.33628381600963	Sepsis	HAI	Empirical: awaiting culture	Non-Invasive Ventilation	1	1	1	0	0	1	0	0	0	0	0	0	0	0	0	0	0	0
2nd PPS/C10H20P11	2nd PPS	Europe	C10	H20	Female	24	11.5	Clindamycin	110	mg	3	330	28.695652173913043	Upper Respiratory Infections (URTI)	CAI	Targeted	No Ventilation	1	1	0	0	0	0	0	0	0	0	0	0	0	0	0	0	0	0
2nd PPS/C10H20P12	2nd PPS	Europe	C10	H20	Female	5	5.099999904632568	Vancomycin	90	mg	3	270	52.94117746056159	Sepsis	Unknown	Empirical: pathogen determined	Invasive Ventilation	3	2	1	0	0	1	0	0	0	0	0	0	0	0	0	0	0	0
2nd PPS/C10H20P13	2nd PPS	Europe	C10	H20	Female	5	5.099999904632568	Meropenem	90	mg	3	270	52.94117746056159	Sepsis	HAI	Empirical: pathogen determined	Invasive Ventilation	3	2	1	0	0	1	0	0	0	0	0	0	0	0	0	0	0	0
2nd PPS/C10H20P14	2nd PPS	Europe	C10	H20	Female	36	18	Meropenem	570	mg	3	1710	95	Central Nervous System (CNS) infections	HAI	Targeted	No Ventilation	1	1	1	0	0	0	0	0	0	1	0	0	0	0	0	0	0	0
2nd PPS/C10H20P15	2nd PPS	Europe	C10	H20	Male	36	15.899999618530273	Pip-taz	1600	mg	3	4800	301.8867996956399	Febrile neutropenia/Fever	HAI	Empirical: pathogen determined	No Ventilation	3	1	1	0	0	0	0	0	1	0	0	0	0	0	0	0	0	0
2nd PPS/C10H20P16	2nd PPS	Europe	C10	H20	Male	120	26.5	Pip-taz	2800	mg	3	8400	316.9811320754717	Febrile neutropenia/Fever	HAI	Empirical: pathogen determined	No Ventilation	3	1	2	0	0	0	0	0	0	1	0	0	0	0	0	0	0	0
2nd PPS/C10H20P17	2nd PPS	Europe	C10	H20	Male	84	22	Ceftriaxone	1800	mg	1	1800	81.81818181818181	Central Nervous System (CNS) infections	Unknown	Empirical: awaiting culture	No Ventilation	3	3	1	0	0	0	0	0	0	0	0	0	1	0	0	0	0	0
2nd PPS/C10H20P18	2nd PPS	Europe	C10	H20	Male	2	4.300000190734863	Cefotaxime	200	mg	4	800	186.04650337545246	Urinary Tract Infections (UTI)	CAI	Targeted	No Ventilation	1	1	0	0	0	0	0	0	0	0	0	0	0	0	0	0	0	0
2nd PPS/C10H20P19	2nd PPS	Europe	C10	H20	Female	96	27	Ceftriaxone	1400	mg	1	1400	51.851851851851855	Urinary Tract Infections (UTI)	Unknown	Empirical: awaiting culture	No Ventilation	1	1	0	0	0	0	0	0	0	0	0	0	0	0	0	0	0	0
2nd PPS/C10H20P20	2nd PPS	Europe	C10	H20	Female	60	25	Cefuroxime	1300	mg	3	3900	156	Lymphadenitis	CAI	Empirical: awaiting culture	No Ventilation	4	1	1	0	0	0	0	0	1	0	0	0	0	0	0	0	0	0
2nd PPS/C10H20P21	2nd PPS	Europe	C10	H20	Female	84	31	Pip-taz	3000	mg	3	9000	290.3225806451613	GI tract infections	CAI	Empirical: pathogen determined	No Ventilation	1	1	1	0	0	0	0	0	0	0	0	0	0	0	1	0	0	0
2nd PPS/C10H20P22	2nd PPS	Europe	C10	H20	Male	132	42	Pip-taz	4000	mg	3	12000	285.7142857142857	Urinary Tract Infections (UTI)	CAI	Empirical: awaiting culture	No Ventilation	1	1	0	0	0	0	0	0	0	0	0	0	0	0	0	0	0	0
2nd PPS/C10H20P23	2nd PPS	Europe	C10	H20	Female	18	8.699999809265137	Pip-taz	750	mg	3	2250	258.6206953250555	Febrile neutropenia/Fever	HAI	Empirical: awaiting culture	No Ventilation	5	2	2	0	0	0	0	0	0	1	0	0	0	0	1	0	0	0
2nd PPS/C10H20P24	2nd PPS	Europe	C10	H20	Male	60	17.100000381469727	Pip-taz	1700	mg	3	5100	298.24560738177365	GI tract infections	CAI	Empirical: awaiting culture	No Ventilation	1	1	1	0	0	0	0	0	0	1	0	0	0	0	0	0	0	0
2nd PPS/C10H20P25	2nd PPS	Europe	C10	H20	Male	11	9.600000381469727	Cefuroxime	350	mg	3	1050	109.37499565382815	Skin/Soft Tissue Infections (SSTI)	CAI	Empirical: pathogen determined	No Ventilation	1	1	0	0	0	0	0	0	0	0	0	0	0	0	0	0	0	0
2nd PPS/C10H20P26	2nd PPS	Europe	C10	H20	Female	120	44	Cefuroxime	1500	mg	3	4500	102.27272727272727	Skin/Soft Tissue Infections (SSTI)	Unknown	Empirical: pathogen determined	No Ventilation	1	1	0	0	0	0	0	0	0	0	0	0	0	0	0	0	0	0
2nd PPS/C10H20P27	2nd PPS	Europe	C10	H20	Female	96	26.700000762939453	Cefuroxime	900	mg	3	2700	101.12359261606073	Skin/Soft Tissue Infections (SSTI)	Unknown	Empirical: awaiting culture	No Ventilation	1	1	0	0	0	0	0	0	0	0	0	0	0	0	0	0	0	0
2nd PPS/C10H20P28	2nd PPS	Europe	C10	H20	Male	18	10.399999618530273	Cefuroxime	330	mg	3	990	95.19231118394086	Skin/Soft Tissue Infections (SSTI)	CAI	Empirical: awaiting culture	No Ventilation	1	1	0	0	0	0	0	0	0	0	0	0	0	0	0	0	0	0
2nd PPS/C10H20P29	2nd PPS	Europe	C10	H20	Female	48	15.800000190734863	Ceftriaxone	1500	mg	1	1500	94.9367077147	Central Nervous System (CNS) infections	CAI	Empirical: awaiting culture	No Ventilation	1	1	0	0	0	0	0	0	0	0	0	0	0	0	0	0	0	0
2nd PPS/C10H20P30	2nd PPS	Europe	C10	H20	Male	108	25	Vancomycin	650	mg	2	1300	52	Central Nervous System (CNS) infections	CAI	Empirical: pathogen determined	No Ventilation	2	2	0	0	0	0	0	0	0	0	0	0	0	0	0	0	0	0
2nd PPS/C10H20P31	2nd PPS	Europe	C10	H20	Male	108	25	Meropenem	1000	mg	3	3000	120	Central Nervous System (CNS) infections	CAI	Empirical: pathogen determined	No Ventilation	2	2	0	0	0	0	0	0	0	0	0	0	0	0	0	0	0	0
3rd PPS/C10H20P32	3rd PPS	Europe	C10	H20	Male	11	5.900000095367432	Meropenem	120	mg	3	360	61.01694816626616	Sepsis	HAI	Empirical: awaiting culture	Invasive Ventilation	1	1	3	0	0	0	0	1	0	0	0	0	0	0	0	1	0	1
3rd PPS/C10H20P33	3rd PPS	Europe	C10	H20	Female	108	58	Cefuroxime	1250	mg	3	3750	64.65517241379311	Skin/Soft Tissue Infections (SSTI)	HAI	Empirical: awaiting culture	No Ventilation	1	1	0	0	0	0	0	0	0	0	0	0	0	0	0	0	0	0
3rd PPS/C10H20P34	3rd PPS	Europe	C10	H20	Male	24	12.300000190734863	Pip-taz	1000	mg	3	3000	243.9024352422197	Febrile neutropenia/Fever	HAI	Empirical: pathogen determined	No Ventilation	5	3	1	0	0	0	0	0	0	1	0	0	0	0	0	0	0	0
3rd PPS/C10H20P35	3rd PPS	Europe	C10	H20	Female	96	42.5	Cefuroxime	1500	mg	3	4500	105.88235294117646	Skin/Soft Tissue Infections (SSTI)	CAI	Empirical: pathogen determined	No Ventilation	1	1	0	0	0	0	0	0	0	0	0	0	0	0	0	0	0	0
3rd PPS/C10H20P36	3rd PPS	Europe	C10	H20	Female	60	15.399999618530273	Meropenem	650	mg	3	1950	126.62337975993415	Central Nervous System (CNS) infections	HAI	Targeted	No Ventilation	1	1	1	0	0	0	0	0	0	0	0	0	1	0	0	0	0	0
3rd PPS/C10H20P37	3rd PPS	Europe	C10	H20	Female	13	7.199999809265137	Pip-taz	600	mg	3	1800	250.00000662273848	Febrile neutropenia/Fever	HAI	Empirical: pathogen determined	No Ventilation	3	2	1	0	0	0	0	0	0	1	0	0	0	0	0	0	0	0
3rd PPS/C10H18P28	3rd PPS	Europe	C10	H18	Male	5	6.519999980926514	Cefuroxime	90	mg	2	180	27.607362043952246	Central Nervous System (CNS) infections	Unknown	Empirical: awaiting culture	No Ventilation	1	1	1	0	0	0	0	0	0	0	0	0	0	1	0	0	0	0
3rd PPS/C10H18P29	3rd PPS	Europe	C10	H18	Female	48	14	Gentamicin	60	mg	1	60	4.285714285714286	Unknown	Unknown	Empirical: awaiting culture	No Ventilation	2	2	1	0	0	0	0	0	0	0	0	0	0	1	0	0	0	0
3rd PPS/C10H18P30	3rd PPS	Europe	C10	H18	Female	2	3	Meropenem	60	mg	3	180	60	Sepsis	CAI	Empirical: awaiting culture	No Ventilation	2	2	2	0	1	1	0	2	0	0	0	0	0	0	0	0	0	0
3rd PPS/C10H18P31	3rd PPS	Europe	C10	H18	Female	2	3	Vancomycin	40	mg	3	120	40	Sepsis	CAI	Empirical: awaiting culture	No Ventilation	2	2	2	0	1	1	0	2	0	0	0	0	0	0	0	0	0	0
3rd PPS/C10H18P32	3rd PPS	Europe	C10	H18	Male	1	7.400000095367432	Vancomycin	50	mg	2	100	13.513513339358235	Sepsis	HAI	Targeted	No Ventilation	2	2	3	0	1	0	0	2	0	0	0	0	0	0	1	1	0	0
3rd PPS/C10H18P33	3rd PPS	Europe	C10	H18	Male	1	7.400000095367432	Meropenem	150	mg	3	450	60.810810027112055	Sepsis	HAI	Targeted	No Ventilation	2	2	3	0	1	0	0	2	0	0	0	0	0	0	1	1	0	0
3rd PPS/C10H18P34	3rd PPS	Europe	C10	H18	Male	1	3.5999999046325684	Meropenem	35	mg	3	105	29.16666743931949	Bacterial LRTI	HAI	Targeted	Invasive Ventilation	2	1	2	0	0	1	0	0	0	0	0	0	0	0	0	0	0	1
3rd PPS/C10H18P35	3rd PPS	Europe	C10	H18	Female	2	3.450000047683716	Meropenem	50	mg	1	50	14.492753422878744	Sepsis	HAI	Empirical: awaiting culture	Non-Invasive Ventilation	2	2	1	0	0	1	0	0	0	0	0	0	0	0	0	0	0	0
3rd PPS/C10H18P36	3rd PPS	Europe	C10	H18	Female	2	3.450000047683716	Vancomycin	40	mg	1	40	11.594202738302995	CRBSI	HAI	Empirical: awaiting culture	Non-Invasive Ventilation	2	2	1	0	0	1	0	0	0	0	0	0	0	0	0	0	0	0
3rd PPS/C10H18P37	3rd PPS	Europe	C10	H18	Female	36	12	Metronidazole	120	mg	3	360	30	Sepsis	HAI	Empirical: awaiting culture	Invasive Ventilation	6	3	3	0	1	0	0	1	1	0	0	0	0	2	0	0	0	0
3rd PPS/C10H18P38	3rd PPS	Europe	C10	H18	Female	36	12	Meropenem	240	mg	2	480	40	Sepsis	HAI	Empirical: awaiting culture	Invasive Ventilation	6	3	3	0	1	0	0	1	1	0	0	0	0	2	0	0	0	0
3rd PPS/C10H18P39	3rd PPS	Europe	C10	H18	Female	36	12	Vancomycin	60	mg	3	180	15	Sepsis	HAI	Empirical: awaiting culture	Invasive Ventilation	6	3	3	0	1	0	0	1	1	0	0	0	0	2	0	0	0	0
3rd PPS/C10H18P40	3rd PPS	Europe	C10	H18	Female	108	23	Cefuroxime	750	mg	3	2250	97.82608695652173	Bacterial LRTI	CAI	Empirical: awaiting culture	No Ventilation	2	2	1	0	0	1	0	0	0	0	0	0	0	0	0	0	0	0
3rd PPS/C10H18P41	3rd PPS	Europe	C10	H18	Male	84	20.600000381469727	Ceftazidime	750	mg	3	2250	109.22329894828243	Acute Otitis Media (AOM)	Unknown	Empirical: awaiting culture	No Ventilation	2	2	3	0	0	0	0	0	0	0	0	0	0	0	1	1	0	1
3rd PPS/C10H18P42	3rd PPS	Europe	C10	H18	Male	84	20.600000381469727	Ampicillin	750	mg	3	2250	109.22329894828243	Acute Otitis Media (AOM)	Unknown	Empirical: awaiting culture	No Ventilation	2	2	3	0	0	0	0	0	0	0	0	0	0	0	1	1	0	1
3rd PPS/C10H18P43	3rd PPS	Europe	C10	H18	Female	1	4.300000190734863	Cefuroxime	60	mg	3	180	41.8604632594768	Skin/Soft Tissue Infections (SSTI)	CAI	Empirical: awaiting culture	No Ventilation	1	1	0	0	0	0	0	0	0	0	0	0	0	0	0	0	0	0
3rd PPS/C10H18P44	3rd PPS	Europe	C10	H18	Male	132	23.299999237060547	Pip-taz	1900	mg	3	5700	244.63520114342688	Febrile neutropenia/Fever	HAI	Empirical: awaiting culture	No Ventilation	4	2	3	0	0	0	0	0	0	1	0	0	0	0	2	0	0	1
3rd PPS/C10H18P45	3rd PPS	Europe	C10	H18	Female	132	26.299999237060547	Ciprofloxacin	300	mg	1	300	11.406844437366223	Sepsis	HAI	Empirical: pathogen determined	No Ventilation	5	4	3	0	0	1	0	0	0	1	0	0	0	0	2	0	0	0
3rd PPS/C10H18P46	3rd PPS	Europe	C10	H18	Female	132	26.299999237060547	Meropenem	500	mg	1	500	19.01140739561037	Sepsis	HAI	Empirical: pathogen determined	No Ventilation	5	4	3	0	0	1	0	0	0	1	0	0	0	0	2	0	0	0
3rd PPS/C10H18P47	3rd PPS	Europe	C10	H18	Male	5	6.400000095367432	Vancomycin	110	mg	2	220	34.37499948777259	Febrile neutropenia/Fever	HAI	Empirical: awaiting culture	No Ventilation	4	3	1	0	0	0	0	0	1	0	0	0	0	0	0	0	0	0
3rd PPS/C10H18P48	3rd PPS	Europe	C10	H18	Male	5	6.400000095367432	Gentamicin	35	mg	1	35	5.468749918509276	Febrile neutropenia/Fever	HAI	Empirical: awaiting culture	No Ventilation	4	3	1	0	0	0	0	0	1	0	0	0	0	0	0	0	0	0
3rd PPS/C10H18P49	3rd PPS	Europe	C10	H18	Male	5	5.699999809265137	Gentamicin	23	mg	1	23	4.035087854321391	Sepsis	HAI	Empirical: awaiting culture	No Ventilation	6	3	2	0	0	0	0	0	1	0	0	0	0	0	2	0	0	0
3rd PPS/C10H18P50	3rd PPS	Europe	C10	H18	Male	5	5.699999809265137	Pip-taz	480	mg	3	1440	252.63158740099146	Sepsis	HAI	Empirical: awaiting culture	No Ventilation	6	3	2	0	0	0	0	0	1	0	0	0	0	0	2	0	0	0
3rd PPS/C10H18P51	3rd PPS	Europe	C10	H18	Male	84	20.700000762939453	Gentamicin	80	mg	1	80	3.864734157074485	Febrile neutropenia/Fever	HAI	Empirical: awaiting culture	No Ventilation	3	2	2	0	0	0	0	0	1	0	0	0	0	0	1	0	0	0
3rd PPS/C10H18P52	3rd PPS	Europe	C10	H18	Male	84	20.700000762939453	Pip-taz	1600	mg	3	4800	231.88404942446908	Febrile neutropenia/Fever	HAI	Empirical: awaiting culture	No Ventilation	3	2	2	0	0	0	0	0	1	0	0	0	0	0	1	0	0	0
3rd PPS/C10H16P1	3rd PPS	Europe	C10	H16	Female	36	13	Cefuroxime	430	mg	3	1290	99.23076923076923	Urinary Tract Infections (UTI)	CAI	Empirical: pathogen determined	No Ventilation	1	1	2	1	0	0	0	0	0	0	0	0	0	0	0	1	1	0
3rd PPS/C10H16P2	3rd PPS	Europe	C10	H16	Male	60	20	Meropenem	500	mg	3	1500	75	Sepsis	CAI	Empirical: pathogen determined	No Ventilation	1	1	1	0	0	0	0	0	0	0	1	0	0	0	0	0	0	0
3rd PPS/C10H16P3	3rd PPS	Europe	C10	H16	Male	60	19	Cefuroxime	600	mg	3	1800	94.73684210526316	Upper Respiratory Infections (URTI)	CAI	Empirical: pathogen determined	No Ventilation	1	1	0	0	0	0	0	0	0	0	0	0	0	0	0	0	0	0
3rd PPS/C10H16P4	3rd PPS	Europe	C10	H16	Female	72	18	Ampicillin	1000	mg	3	3000	166.66666666666666	Upper Respiratory Infections (URTI)	CAI	Empirical: pathogen determined	No Ventilation	2	2	0	0	0	0	0	0	0	0	0	0	0	0	0	0	0	0
3rd PPS/C10H17P1	3rd PPS	Europe	C10	H17	Female	36	15	Ampicillin	700	mg	3	2100	140	Viral LRTI	CAI	Empirical: awaiting culture	No Ventilation	2	2	0	0	0	0	0	0	0	0	0	0	0	0	0	0	0	0
3rd PPS/C10H17P2	3rd PPS	Europe	C10	H17	Male	60	22	Ampicillin	1200	mg	3	3600	163.63636363636363	Bacterial LRTI	CAI	Empirical: awaiting culture	No Ventilation	1	1	0	0	0	0	0	0	0	0	0	0	0	0	0	0	0	0
3rd PPS/C10H17P3	3rd PPS	Europe	C10	H17	Male	6	7	Ceftriaxone	350	mg	1	350	50	Urinary Tract Infections (UTI)	CAI	Targeted	No Ventilation	1	1	1	0	0	0	0	0	0	0	0	0	0	0	0	0	1	0
3rd PPS/C10H17P4	3rd PPS	Europe	C10	H17	Female	60	12	Cefuroxime	600	mg	2	1200	100	Bacterial LRTI	CAI	Empirical: awaiting culture	No Ventilation	1	1	0	0	0	0	0	0	0	0	0	0	0	0	0	0	0	0
3rd PPS/C10H17P5	3rd PPS	Europe	C10	H17	Male	1	3.5	Cefuroxime	140	mg	3	420	120	Bacterial LRTI	Unknown	Empirical: awaiting culture	Non-Invasive Ventilation	1	1	1	0	0	0	0	0	0	0	0	0	0	0	0	0	0	1
3rd PPS/C10H17P6	3rd PPS	Europe	C10	H17	Male	24	21.600000381469727	Pip-taz	2300	mg	3	6900	319.44443880285263	Febrile neutropenia/Fever	CAI	Empirical: pathogen determined	No Ventilation	3	3	1	0	0	0	0	0	1	0	0	0	0	0	0	0	0	0
3rd PPS/C10H17P7	3rd PPS	Europe	C10	H17	Male	24	21.600000381469727	Teicoplanin	200	mg	1	200	9.25925909573486	Febrile neutropenia/Fever	CAI	Empirical: pathogen determined	No Ventilation	3	3	1	0	0	0	0	0	1	0	0	0	0	0	0	0	0	0
3rd PPS/C10H17P8	3rd PPS	Europe	C10	H17	Male	13	9	Ceftriaxone	450	mg	1	450	50	Urinary Tract Infections (UTI)	CAI	Targeted	No Ventilation	1	1	1	0	0	0	0	0	0	0	0	0	0	0	0	0	1	0
3rd PPS/C10H17P9	3rd PPS	Europe	C10	H17	Female	24	11	Ciprofloxacin	150	mg	2	300	27.272727272727273	Unknown	CAI	Empirical: pathogen determined	Invasive Ventilation	1	1	1	0	0	0	0	0	0	0	0	0	1	0	0	0	0	0
3rd PPS/C10H17P10	3rd PPS	Europe	C10	H17	Male	2	7.699999809265137	Pip-taz	750	mg	3	2250	292.2077994460019	Febrile neutropenia/Fever	HAI	Empirical: pathogen determined	No Ventilation	4	2	1	0	0	0	0	0	1	0	0	0	0	0	0	0	0	0
3rd PPS/C10H19P1	3rd PPS	Europe	C10	H19	Female	11	8	Vancomycin	160	mg	3	480	60	Central Nervous System (CNS) infections	HAI	Targeted	No Ventilation	3	1	2	0	0	0	0	0	0	1	0	0	1	0	0	0	0	0
3rd PPS/C10H19P2	3rd PPS	Europe	C10	H19	Male	72	20	Ceftazidime	1000	mg	3	3000	150	Febrile neutropenia/Fever	CAI	Empirical: awaiting culture	No Ventilation	4	3	1	0	0	0	0	0	0	1	0	0	0	0	0	0	0	0
3rd PPS/C10H19P3	3rd PPS	Europe	C10	H19	Male	1	4.199999809265137	Ampicillin	200	mg	3	600	142.85714934472352	Sepsis	CAI	Targeted	No Ventilation	2	2	0	0	0	0	0	0	0	0	0	0	0	0	0	0	0	0
3rd PPS/C10H19P4	3rd PPS	Europe	C10	H19	Male	1	4.199999809265137	Cefotaxime	130	mg	3	390	92.8571470740703	Sepsis	CAI	Targeted	No Ventilation	2	2	0	0	0	0	0	0	0	0	0	0	0	0	0	0	0	0
3rd PPS/C10H19P5	3rd PPS	Europe	C10	H19	Female	17	8	Pip-taz	600	mg	3	1800	225	Sepsis	HAI	Empirical: awaiting culture	No Ventilation	1	1	3	1	1	0	0	1	0	0	0	0	0	1	0	0	1	0
4th PPS/C10H20P38	4th PPS	Europe	C10	H20	Male	1	4.650000095367432	Vancomycin	60	mg	3	180	38.70967662545324	Bacterial LRTI	HAI	Targeted	Non-Invasive Ventilation	3	2	1	0	0	0	1	0	0	0	0	0	0	0	0	0	0	0
4th PPS/C10H20P39	4th PPS	Europe	C10	H20	Male	1	4.650000095367432	Meropenem	95	mg	3	285	61.290321323634295	Bacterial LRTI	HAI	Targeted	Non-Invasive Ventilation	3	2	1	0	0	0	1	0	0	0	0	0	0	0	0	0	0	0
4th PPS/C10H20P40	4th PPS	Europe	C10	H20	Male	12	9.699999809265137	Cefuroxime	330	mg	3	990	102.061857676985	Bacterial LRTI	CAI	Empirical: awaiting culture	Non-Invasive Ventilation	2	1	1	0	0	0	0	0	0	0	0	0	1	0	0	0	0	0
4th PPS/C10H20P41	4th PPS	Europe	C10	H20	Female	132	27.5	Vancomycin	300	mg	3	900	32.72727272727273	Sepsis	HAI	Targeted	Invasive Ventilation	3	2	1	0	0	0	0	0	0	0	0	0	1	0	0	0	0	0
4th PPS/C10H20P42	4th PPS	Europe	C10	H20	Female	132	33.20000076293945	Cefuroxime	1100	mg	3	3300	99.39758807727887	Joint/Bone Infections	CAI	Empirical: pathogen determined	No Ventilation	1	1	0	0	0	0	0	0	0	0	0	0	0	0	0	0	0	0
4th PPS/C10H20P43	4th PPS	Europe	C10	H20	Male	60	18.299999237060547	Pip-taz	1600	mg	3	4800	262.29509290247404	Febrile neutropenia/Fever	HAI	Empirical: awaiting culture	No Ventilation	4	2	1	0	0	0	0	0	0	1	0	0	0	0	0	0	0	0
4th PPS/C10H20P44	4th PPS	Europe	C10	H20	Male	1	5.400000095367432	Ampicillin	350	mg	2	700	129.62962734028804	Bacterial LRTI	CAI	Empirical: pathogen determined	No Ventilation	2	2	0	0	0	0	0	0	0	0	0	0	0	0	0	0	0	0
4th PPS/C10H20P45	4th PPS	Europe	C10	H20	Female	9	8.5	Pip-taz	800	mg	2	1600	188.23529411764707	Sepsis	HAI	Empirical: pathogen determined	No Ventilation	1	1	1	0	0	0	0	0	0	0	0	0	0	0	0	0	1	0
4th PPS/C10H20P46	4th PPS	Europe	C10	H20	Female	8	8.300000190734863	Ampicillin	275	mg	3	825	99.39758807727887	Urinary Tract Infections (UTI)	CAI	Empirical: pathogen determined	No Ventilation	2	2	0	0	0	0	0	0	0	0	0	0	0	0	0	0	0	0
4th PPS/C10H20P47	4th PPS	Europe	C10	H20	Male	12	11.5	Ampicillin	380	mg	3	1140	99.1304347826087	Urinary Tract Infections (UTI)	CAI	Targeted	No Ventilation	1	1	1	0	0	0	0	0	0	0	0	0	1	0	0	0	0	0
4th PPS/C10H20P48	4th PPS	Europe	C10	H20	Female	60	16.200000762939453	Pip-taz	1500	mg	3	4500	277.7777646958262	Febrile neutropenia/Fever	HAI	Empirical: awaiting culture	No Ventilation	3	2	1	0	0	0	0	0	0	1	0	0	0	0	0	0	0	0
4th PPS/C10H18P53	4th PPS	Europe	C10	H18	Male	1	3.5	Cefuroxime	120	mg	3	360	102.85714285714286	Bacterial LRTI	CAI	Empirical: awaiting culture	Non-Invasive Ventilation	1	1	1	0	0	0	0	0	0	0	0	0	0	0	0	1	0	0
4th PPS/C10H18P54	4th PPS	Europe	C10	H18	Female	6	4.300000190734863	Vancomycin	35	mg	4	140	32.55813809070418	Sepsis	HAI	Empirical: awaiting culture	Invasive Ventilation	2	2	2	0	0	1	0	0	0	0	0	0	0	1	0	0	0	0
4th PPS/C10H18P55	4th PPS	Europe	C10	H18	Female	6	4.300000190734863	Meropenem	75	mg	3	225	52.32557907434601	Sepsis	HAI	Empirical: awaiting culture	Invasive Ventilation	2	2	2	0	0	1	0	0	0	0	0	0	0	1	0	0	0	0
4th PPS/C10H18P56	4th PPS	Europe	C10	H18	Male	120	46.5	Teicoplanin	400	mg	1	400	8.602150537634408	Febrile neutropenia/Fever	Unknown	Empirical: awaiting culture	No Ventilation	5	3	2	0	0	0	0	0	0	0	2	0	0	0	1	0	0	0
4th PPS/C10H18P57	4th PPS	Europe	C10	H18	Male	120	46.5	Meropenem	1500	mg	3	4500	96.7741935483871	Febrile neutropenia/Fever	CAI	Empirical: awaiting culture	No Ventilation	5	3	2	0	0	0	0	0	0	0	2	0	0	0	1	0	0	0
4th PPS/C10H18P58	4th PPS	Europe	C10	H18	Male	132	28.899999618530273	Metronidazole	200	mg	3	600	20.76124594878155	Unknown	Unknown	Targeted	No Ventilation	4	2	1	0	0	0	0	0	0	1	0	0	0	0	0	0	0	0
4th PPS/C10H18P59	4th PPS	Europe	C10	H18	Male	120	7.5	Ceftazidime	250	mg	3	750	100	Unknown	Unknown	Unknown	No Ventilation	7	5	2	0	0	0	0	0	0	1	0	0	0	0	1	0	0	0
4th PPS/C10H18P60	4th PPS	Europe	C10	H18	Male	120	7.5	Amikacin	90	mg	1	90	12	Febrile neutropenia/Fever	HAI	Targeted	No Ventilation	7	5	2	0	0	0	0	0	0	1	0	0	0	0	1	0	0	0
4th PPS/C10H18P61	4th PPS	Europe	C10	H18	Male	120	7.5	Vancomycin	150	mg	2	300	40	Unknown	Unknown	Unknown	No Ventilation	7	5	2	0	0	0	0	0	0	1	0	0	0	0	1	0	0	0
4th PPS/C10H18P62	4th PPS	Europe	C10	H18	Male	120	7.5	Metronidazole	50	mg	3	150	20	Unknown	Unknown	Unknown	No Ventilation	7	5	2	0	0	0	0	0	0	1	0	0	0	0	1	0	0	0
4th PPS/C10H18P63	4th PPS	Europe	C10	H18	Male	24	11.25	Amikacin	150	mg	1	150	13.333333333333334	Sepsis	HAI	Targeted	No Ventilation	8	4	2	0	0	0	0	0	1	0	0	0	0	0	1	0	0	0
4th PPS/C10H18P64	4th PPS	Europe	C10	H18	Male	24	11.25	Meropenem	380	mg	3	1140	101.33333333333333	GI tract infections	HAI	Targeted	No Ventilation	8	4	2	0	0	0	0	0	1	0	0	0	0	0	1	0	0	0
4th PPS/C10H18P65	4th PPS	Europe	C10	H18	Female	6	8.199999809265137	Meropenem	150	mg	3	450	54.87805005697041	Bacterial LRTI	HAI	Targeted	Non-Invasive Ventilation	2	2	1	0	0	0	0	0	0	0	0	0	0	0	0	0	0	1
4th PPS/C10H18P66	4th PPS	Europe	C10	H18	Female	6	8.199999809265137	Vancomycin	40	mg	3	120	14.634146681858777	Bacterial LRTI	HAI	Empirical: awaiting culture	Non-Invasive Ventilation	2	2	1	0	0	0	0	0	0	0	0	0	0	0	0	0	0	1
4th PPS/C10H18P67	4th PPS	Europe	C10	H18	Female	24	19	Cefuroxime	700	mg	3	2100	110.52631578947368	Central Nervous System (CNS) infections	HAI	Empirical: awaiting culture	No Ventilation	1	1	0	0	0	0	0	0	0	0	0	0	0	0	0	0	0	0
4th PPS/C10H18P68	4th PPS	Europe	C10	H18	Male	23	13	Vancomycin	130	mg	4	520	40	CRBSI	CAI	Targeted	Invasive Ventilation	5	3	1	0	0	0	0	0	1	0	0	0	0	0	0	0	0	0
4th PPS/C10H18P69	4th PPS	Europe	C10	H18	Male	23	13	Amikacin	200	mg	1	200	15.384615384615385	Sepsis	CAI	Empirical: awaiting culture	Invasive Ventilation	5	3	1	0	0	0	0	0	1	0	0	0	0	0	0	0	0	0
4th PPS/C10H18P70	4th PPS	Europe	C10	H18	Male	23	13	Meropenem	280	mg	3	840	64.61538461538461	Sepsis	HAI	Empirical: awaiting culture	Invasive Ventilation	5	3	1	0	0	0	0	0	1	0	0	0	0	0	0	0	0	0
4th PPS/C10H18P71	4th PPS	Europe	C10	H18	Male	3	6.5	Cefuroxime	250	mg	3	750	115.38461538461539	Bacterial LRTI	Unknown	Empirical: pathogen determined	No Ventilation	1	1	0	0	0	0	0	0	0	0	0	0	0	0	0	0	0	0
4th PPS/C10H18P72	4th PPS	Europe	C10	H18	Male	7	6.590000152587891	Pip-taz	300	mg	3	900	136.57055829453515	Sepsis	HAI	Empirical: pathogen determined	No Ventilation	3	3	2	0	0	0	0	1	0	0	0	0	0	0	1	0	0	0
4th PPS/C10H18P73	4th PPS	Europe	C10	H18	Female	48	13	Meropenem	250	mg	3	750	57.69230769230769	Sepsis	HAI	Empirical: awaiting culture	No Ventilation	4	2	2	0	0	0	0	0	0	0	0	0	0	2	1	0	0	0
4th PPS/C10H18P74	4th PPS	Europe	C10	H18	Female	4	4.599999904632568	Vancomycin	60	mg	3	180	39.130435593862856	CRBSI	HAI	Targeted	No Ventilation	1	1	2	0	0	0	0	1	0	0	0	0	0	1	0	0	0	0
4th PPS/C10H18P75	4th PPS	Europe	C10	H18	Female	7	8	Pip-taz	650	mg	3	1950	243.75	Febrile neutropenia/Fever	Unknown	Empirical: pathogen determined	No Ventilation	3	2	1	0	0	0	0	0	0	1	0	0	0	0	0	0	0	0
4th PPS/C10H18P76	4th PPS	Europe	C10	H18	Male	9	8.199999809265137	Pip-taz	500	mg	3	1500	182.9268335232347	Sepsis	HAI	Targeted	Invasive Ventilation	1	1	1	0	0	2	0	0	0	0	0	0	0	0	0	0	0	0
Pilot PPS/C12H32P1	Pilot PPS	Europe	C12	H32	Female	11	7.300000190734863	Co-amoxiclav	220	mg	3	660	90.41095654184637	Lymphadenitis	CAI	Empirical: no culture	Invasive Ventilation	1	1
Pilot PPS/C12H32P2	Pilot PPS	Europe	C12	H32	Male	7	7	Co-amoxiclav	210	mg	3	630	90	Urinary Tract Infections (UTI)	Unknown	Empirical: awaiting culture	Unknown	1	1
Pilot PPS/C12H32P3	Pilot PPS	Europe	C12	H32	Male	48	20.399999618530273	Co-amoxiclav	600	mg	3	1800	88.23529576760265	Other	CAI	Empirical: no culture	No Ventilation	1	1	1	0	0	0	0	0	0	0	0	0	0	0	0	0	0	1
Pilot PPS/C12H32P4	Pilot PPS	Europe	C12	H32	Female	132	24.200000762939453	Co-amoxiclav	730	mg	3	2190	90.49586491558406	Bacterial LRTI	CAI	Empirical: no culture	Non-Invasive Ventilation	2	2	2	0	0	0	0	1	1	0	0	0	0	0	0	0	0	0
Pilot PPS/C12H32P5	Pilot PPS	Europe	C12	H32	Female	3	4.599999904632568	Cefotaxime	230	mg	3	690	150.0000031098076	Sepsis	CAI	Empirical: no culture	Invasive Ventilation	2	2	1	0	0	0	0	0	0	0	0	0	0	0	1	0	0	0
Pilot PPS/C12H32P6	Pilot PPS	Europe	C12	H32	Female	72	28.200000762939453	Ceftriaxone	1400	mg	1	1400	49.64538872778632	Sepsis	CAI	Empirical: awaiting culture	No Ventilation	1	1
Pilot PPS/C12H32P7	Pilot PPS	Europe	C12	H32	Female	1	5.300000190734863	Ceftriaxone	265.5	mg	1	265.5	50.094337819861	Sepsis	CAI	Empirical: no culture	No Ventilation	1	1
Pilot PPS/C12H32P8	Pilot PPS	Europe	C12	H32	Female	12	14	Ciprofloxacin	140	mg	2	280	20	Febrile neutropenia/Fever	HAI	Empirical: awaiting culture	Invasive Ventilation	4	3	3	0	0	0	0	0	1	0	0	0	0	0	1	0	0	1
Pilot PPS/C12H32P9	Pilot PPS	Europe	C12	H32	Female	12	14	Pip-taz	1260	mg	4	5040	360	Febrile neutropenia/Fever	HAI	Empirical: awaiting culture	Invasive Ventilation	4	3	3	0	0	0	0	0	1	0	0	0	0	0	1	0	0	1
Pilot PPS/C12H32P10	Pilot PPS	Europe	C12	H32	Female	108	28.200000762939453	Gentamicin	196	mg	1	196	6.9503544218900855	Febrile neutropenia/Fever	HAI	Empirical: awaiting culture	No Ventilation	4	4	1	0	0	0	0	0	1	0	0	0	0	0	0	0	0	0
Pilot PPS/C12H32P11	Pilot PPS	Europe	C12	H32	Female	108	28.200000762939453	Metronidazole	225	mg	3	675	23.93616956518269	Febrile neutropenia/Fever	HAI	Empirical: awaiting culture	No Ventilation	4	4	1	0	0	0	0	0	1	0	0	0	0	0	0	0	0	0
Pilot PPS/C12H32P12	Pilot PPS	Europe	C12	H32	Female	108	28.200000762939453	Pip-taz	2500	mg	4	10000	354.609919484188	Febrile neutropenia/Fever	HAI	Empirical: awaiting culture	No Ventilation	4	4	1	0	0	0	0	0	1	0	0	0	0	0	0	0	0	0
Pilot PPS/C12H32P13	Pilot PPS	Europe	C12	H32	Male	60	18	Gentamicin	130	mg	1	130	7.222222222222222	Febrile neutropenia/Fever	Unknown	Empirical: awaiting culture	No Ventilation	3	3	1	0	0	0	0	0	1	0	0	0	0	0	0	0	0	0
Pilot PPS/C12H32P14	Pilot PPS	Europe	C12	H32	Male	60	18	Pip-taz	1700	mg	4	6800	377.77777777777777	Febrile neutropenia/Fever	Unknown	Empirical: awaiting culture	No Ventilation	3	3	1	0	0	0	0	0	1	0	0	0	0	0	0	0	0	0
Pilot PPS/C12H32P15	Pilot PPS	Europe	C12	H32	Male	24	15	Gentamicin	105	mg	1	105	7	Febrile neutropenia/Fever	Unknown	Empirical: awaiting culture	Unknown	4	3
Pilot PPS/C12H32P16	Pilot PPS	Europe	C12	H32	Male	24	15	Pip-taz	1350	mg	4	5400	360	Febrile neutropenia/Fever	Unknown	Empirical: awaiting culture	Unknown	4	3
Pilot PPS/C12H32P17	Pilot PPS	Europe	C12	H32	Female	3	9	Gentamicin	63	mg	1	63	7	Bacterial LRTI	Unknown	Empirical: awaiting culture	No Ventilation	2	2	2	0	0	0	0	1	0	0	0	0	0	0	1	0	0	0
Pilot PPS/C12H32P18	Pilot PPS	Europe	C12	H32	Female	3	9	Pip-taz	810	mg	3	2430	270	Sepsis	Unknown	Empirical: awaiting culture	No Ventilation	2	2	2	0	0	0	0	1	0	0	0	0	0	0	1	0	0	0
Pilot PPS/C12H32P19	Pilot PPS	Europe	C12	H32	Male	36	12.699999809265137	Gentamicin	89	mg	1	89	7.007874120995741	Sepsis	Unknown	Empirical: awaiting culture	Unknown	4	2
Pilot PPS/C12H32P20	Pilot PPS	Europe	C12	H32	Male	36	12.699999809265137	Pip-taz	1140	mg	4	4560	359.05512350270317	Sepsis	Unknown	Empirical: awaiting culture	Unknown	4	2
Pilot PPS/C12H32P21	Pilot PPS	Europe	C12	H32	Male	132	41	Gentamicin	285	mg	1	285	6.951219512195122	CRBSI	HAI	Empirical: awaiting culture	No Ventilation	2	2	1	0	0	0	0	1	0	0	0	0	0	0	0	0	0	0
Pilot PPS/C12H32P22	Pilot PPS	Europe	C12	H32	Male	132	41	Teicoplanin	415	mg	3	1245	30.365853658536587	CRBSI	HAI	Empirical: awaiting culture	No Ventilation	2	2	1	0	0	0	0	1	0	0	0	0	0	0	0	0	0	0
Pilot PPS/C12H32P23	Pilot PPS	Europe	C12	H32	Female	14	9	Gentamicin	63	mg	1	63	7	Viral LRTI	Unknown	Empirical: pathogen determined	Unknown	2	2
Pilot PPS/C12H32P24	Pilot PPS	Europe	C12	H32	Female	14	9	Pip-taz	810	mg	4	3240	360	Viral LRTI	Unknown	Empirical: pathogen determined	Unknown	2	2
Pilot PPS/C12H32P25	Pilot PPS	Europe	C12	H32	Male	120	56	Pip-taz	4500	mg	4	18000	321.42857142857144	Febrile neutropenia/Fever	Unknown	Empirical: awaiting culture	Unknown	1	1
2nd PPS/C12H26P1	2nd PPS	Europe	C12	H26	Male	20	13.5	Co-amoxiclav	125	mg	3	375	27.77777777777778	Acute Otitis Media (AOM)	CAI	Empirical: awaiting culture	No Ventilation	1	1	0	0	0	0	0	0	0	0	0	0	0	0	0	0	0	0
2nd PPS/C12H26P2	2nd PPS	Europe	C12	H26	Male	1	4.619999885559082	Gentamicin	31	mg	1	31	6.7099568761674515	CRBSI	HAI	Empirical: pathogen determined	No Ventilation	2	2	1	0	0	0	0	1	0	0	0	0	0	0	0	0	0	0
2nd PPS/C12H26P3	2nd PPS	Europe	C12	H26	Male	1	4.619999885559082	Teicoplanin	45	mg	1	45	9.740259981533397	CRBSI	HAI	Empirical: pathogen determined	No Ventilation	2	2	1	0	0	0	0	1	0	0	0	0	0	0	0	0	0	0
2nd PPS/C12H26P4	2nd PPS	Europe	C12	H26	Female	48	17.899999618530273	Pip-taz	1650	mg	4	6600	368.7150916566282	Febrile neutropenia/Fever	CAI	Empirical: awaiting culture	No Ventilation	2	2	1	0	0	0	0	0	0	1	0	0	0	0	0	0	0	0
2nd PPS/C12H26P5	2nd PPS	Europe	C12	H26	Male	120	47.70000076293945	Pip-taz	4290	mg	4	17160	359.74842191894624	Febrile neutropenia/Fever	CAI	Empirical: pathogen determined	No Ventilation	1	1	1	0	0	0	0	0	0	1	0	0	0	0	0	0	0	0
2nd PPS/C12H26P6	2nd PPS	Europe	C12	H26	Female	96	20.200000762939453	Pip-taz	1800	mg	4	7200	356.4356301020394	Febrile neutropenia/Fever	CAI	Empirical: pathogen determined	No Ventilation	4	3	1	0	0	0	0	0	0	1	0	0	0	0	0	0	0	0
2nd PPS/C12H26P7	2nd PPS	Europe	C12	H26	Female	96	20.200000762939453	Metronidazole	150	mg	3	450	22.277226881377462	Other	Unknown	Empirical: awaiting culture	No Ventilation	4	3	1	0	0	0	0	0	0	1	0	0	0	0	0	0	0	0
2nd PPS/C12H26P8	2nd PPS	Europe	C12	H26	Male	24	12.699999809265137	Ciprofloxacin	128	mg	3	384	30.23622092654342	CRBSI	CAI	Targeted	No Ventilation	2	2	1	0	0	0	0	0	0	1	0	0	0	0	0	0	0	0
2nd PPS/C12H26P9	2nd PPS	Europe	C12	H26	Female	60	21.899999618530273	Pip-taz	1970	mg	4	7880	359.81735786572733	Febrile neutropenia/Fever	CAI	Empirical: pathogen determined	No Ventilation	3	2	1	0	0	0	0	0	0	1	0	0	0	0	0	0	0	0
2nd PPS/C12H26P10	2nd PPS	Europe	C12	H26	Male	24	12	Cefuroxime	600	mg	3	1800	150	Joint/Bone Infections	CAI	Empirical: awaiting culture	No Ventilation	1	1	0	0	0	0	0	0	0	0	0	0	0	0	0	0	0	0
2nd PPS/C12H26P11	2nd PPS	Europe	C12	H26	Male	132	33.20000076293945	Vancomycin	500	mg	4	2000	60.240962471078106	Joint/Bone Infections	CAI	Targeted	No Ventilation	2	1	0	0	0	0	0	0	0	0	0	0	0	0	0	0	0	0
2nd PPS/C12H26P12	2nd PPS	Europe	C12	H26	Female	2	4.739999771118164	Cefotaxime	250	mg	3	750	158.2278557416629	Sepsis	CAI	Empirical: pathogen determined	No Ventilation	1	1	0	0	0	0	0	0	0	0	0	0	0	0	0	0	0	0
2nd PPS/C12H26P13	2nd PPS	Europe	C12	H26	Female	60	15.5	Cefotaxime	775	mg	4	3100	200	Skin/Soft Tissue Infections (SSTI)	CAI	Empirical: pathogen determined	No Ventilation	1	1	0	0	0	0	0	0	0	0	0	0	0	0	0	0	0	0
2nd PPS/C12H26P14	2nd PPS	Europe	C12	H26	Male	2	4.599999904632568	Co-amoxiclav	138	mg	2	276	60.000001243923045	GI tract infections	Unknown	Empirical: awaiting culture	Non-Invasive Ventilation	1	1	1	0	0	0	0	1	0	0	0	0	0	0	0	0	0	0
2nd PPS/C12H26P15	2nd PPS	Europe	C12	H26	Male	120	32	Co-amoxiclav	800	mg	3	2400	75	Bacterial LRTI	CAI	Empirical: pathogen determined	No Ventilation	1	1	0	0	0	0	0	0	0	0	0	0	0	0	0	0	0	0
2nd PPS/C12H26P16	2nd PPS	Europe	C12	H26	Male	96	28.5	Pip-taz	2250	mg	3	6750	236.8421052631579	Skin/Soft Tissue Infections (SSTI)	CAI	Targeted	No Ventilation	1	1	2	0	0	0	0	0	0	0	0	0	1	1	0	0	0	0
2nd PPS/C12H26P17	2nd PPS	Europe	C12	H26	Male	14	10.550000190734863	Cefotaxime	500	mg	3	1500	142.18009221623691	Sepsis	CAI	Empirical: pathogen determined	No Ventilation	1	1	0	0	0	0	0	0	0	0	0	0	0	0	0	0	0	0
2nd PPS/C12H26P18	2nd PPS	Europe	C12	H26	Male	24	12.699999809265137	Pip-taz	1100	mg	4	4400	346.4566981166434	Febrile neutropenia/Fever	CAI	Empirical: pathogen determined	No Ventilation	1	1	0	0	0	0	0	0	0	0	0	0	0	0	0	0	0	0
2nd PPS/C12H26P19	2nd PPS	Europe	C12	H26	Male	36	16.299999237060547	Co-amoxiclav	480	mg	3	1440	88.34356241722634	Other	Unknown	Empirical: awaiting culture	No Ventilation	1	1	0	0	0	0	0	0	0	0	0	0	0	0	0	0	0	0
2nd PPS/C12H26P20	2nd PPS	Europe	C12	H26	Female	24	15	Co-amoxiclav	450	mg	3	1350	90	Bacterial LRTI	CAI	Empirical: awaiting culture	No Ventilation	1	1	1	0	0	0	0	0	0	0	0	0	1	0	0	0	0	0
2nd PPS/C12H26P21	2nd PPS	Europe	C12	H26	Male	84	30.200000762939453	Meropenem	550	mg	1	550	18.211920069715486	GI tract infections	HAI	Targeted	No Ventilation	2	2	3	0	0	0	0	1	0	0	0	0	1	0	0	0	1	0
2nd PPS/C12H26P22	2nd PPS	Europe	C12	H26	Male	24	12.399999618530273	Teicoplanin	130	mg	1	130	10.483871290264476	CRBSI	HAI	Targeted	No Ventilation	2	2	1	0	0	0	0	1	0	0	0	0	0	0	0	0	0	0
2nd PPS/C12H26P23	2nd PPS	Europe	C12	H26	Male	24	12.399999618530273	Meropenem	260	mg	3	780	62.90322774158686	CRBSI	HAI	Targeted	No Ventilation	2	2	1	0	0	0	0	1	0	0	0	0	0	0	0	0	0	0
2nd PPS/C12H26P24	2nd PPS	Europe	C12	H26	Female	24	13.75	Cefuroxime	650	mg	3	1950	141.8181818181818	Joint/Bone Infections	CAI	Empirical: awaiting culture	No Ventilation	1	1	0	0	0	0	0	0	0	0	0	0	0	0	0	0	0	0
2nd PPS/C12H26P25	2nd PPS	Europe	C12	H26	Female	4	6.849999904632568	Co-amoxiclav	200	mg	3	600	87.59124209537983	Bacterial LRTI	CAI	Empirical: awaiting culture	No Ventilation	1	1	1	0	0	0	0	0	0	0	0	0	0	0	0	0	0	1
2nd PPS/C12H26P26	2nd PPS	Europe	C12	H26	Female	24	15.75	Ceftriaxone	780	mg	1	780	49.523809523809526	Bacterial LRTI	CAI	Empirical: awaiting culture	No Ventilation	2	2	1	0	0	0	0	0	0	0	0	0	0	0	0	0	0	1
2nd PPS/C12H26P27	2nd PPS	Europe	C12	H26	Female	1	4.5	Cefotaxime	225	mg	4	900	200	Sepsis	CAI	Empirical: pathogen determined	No Ventilation	1	1	0	0	0	0	0	0	0	0	0	0	0	0	0	0	0	0
2nd PPS/C12H26P28	2nd PPS	Europe	C12	H26	Female	36	10.899999618530273	Ceftazidime	500	mg	3	1500	137.61468371521428	Bacterial LRTI	CAI	Empirical: awaiting culture	No Ventilation	2	2	1	0	0	0	0	0	0	0	0	0	0	0	0	0	0	1
2nd PPS/C12H26P29	2nd PPS	Europe	C12	H26	Male	1	4.5	Cefotaxime	200	mg	3	600	133.33333333333334	Sepsis	CAI	Empirical: pathogen determined	Invasive Ventilation	1	1	0	0	0	0	0	0	0	0	0	0	0	0	0	0	0	0
2nd PPS/C12H26P30	2nd PPS	Europe	C12	H26	Male	84	21	Ciprofloxacin	200	mg	3	600	28.571428571428573	CRBSI	HAI	Empirical: awaiting culture	Invasive Ventilation	2	2	1	0	0	0	0	0	0	0	0	0	0	1	0	0	0	0
2nd PPS/C12H26P31	2nd PPS	Europe	C12	H26	Male	84	21	Vancomycin	270	mg	4	1080	51.42857142857143	CRBSI	HAI	Targeted	Invasive Ventilation	2	2	1	0	0	0	0	0	0	0	0	0	0	1	0	0	0	0
2nd PPS/C12H26P32	2nd PPS	Europe	C12	H26	Female	9	4.199999809265137	Pip-taz	380	mg	4	1520	361.9047783399663	Bacterial LRTI	HAI	Empirical: awaiting culture	Invasive Ventilation	1	1	2	0	0	1	0	1	0	0	0	0	0	0	0	0	0	0
2nd PPS/C12H26P33	2nd PPS	Europe	C12	H26	Female	12	3.200000047683716	Pip-taz	288	mg	4	1152	359.999994635582	Bacterial LRTI	HAI	Empirical: awaiting culture	Invasive Ventilation	1	1	1	0	0	0	0	0	0	0	0	0	1	0	0	0	0	0
2nd PPS/C12H26P34	2nd PPS	Europe	C12	H26	Male	9	6.300000190734863	Teicoplanin	63	mg	1	63	9.999999697246258	CRBSI	Unknown	Unknown	Invasive Ventilation	2	2	2	0	0	0	0	0	0	0	0	0	0	0	0	1	0	1
2nd PPS/C12H26P35	2nd PPS	Europe	C12	H26	Male	9	6.300000190734863	Pip-taz	570	mg	4	2280	361.9047509479598	CRBSI	Unknown	Unknown	Invasive Ventilation	2	2	2	0	0	0	0	0	0	0	0	0	0	0	0	1	0	1
2nd PPS/C12H26P36	2nd PPS	Europe	C12	H26	Male	5	5.699999809265137	Cefotaxime	285	mg	4	1140	200.00000669245156	CRBSI	HAI	Targeted	Invasive Ventilation	1	1	3	0	0	1	0	0	0	0	0	0	0	0	0	1	1	0
2nd PPS/C12H26P37	2nd PPS	Europe	C12	H26	Male	96	30.600000381469727	Co-amoxiclav	1000	mg	3	3000	98.03921446408522	Treatment for Surgical disease	Unknown	Empirical: awaiting culture	No Ventilation	1	1	0	0	0	0	0	0	0	0	0	0	0	0	0	0	0	0
2nd PPS/C12H26P38	2nd PPS	Europe	C12	H26	Female	36	10	Ciprofloxacin	100	mg	3	300	30	Bacterial LRTI	CAI	Targeted	Invasive Ventilation	1	1	1	0	0	0	0	0	0	0	0	0	1	0	0	0	0	0
2nd PPS/C12H26P39	2nd PPS	Europe	C12	H26	Female	2	3	Vancomycin	60	mg	3	180	60	CRBSI	HAI	Targeted	Non-Invasive Ventilation	1	1	3	0	0	1	0	0	0	0	0	0	1	0	0	0	1	0
2nd PPS/C12H26P40	2nd PPS	Europe	C12	H26	Female	84	30.100000381469727	Metronidazole	227	mg	3	681	22.624584430877274	Other	Unknown	Empirical: awaiting culture	No Ventilation	2	2	0	0	0	0	0	0	0	0	0	0	0	0	0	0	0	0
2nd PPS/C12H29P1	2nd PPS	Europe	C12	H29	Female	84	24.299999237060547	Vancomycin	365	mg	3	1095	45.06172980985068	Skin/Soft Tissue Infections (SSTI)	HAI	Empirical: awaiting culture	No Ventilation	3	3	1	0	0	0	0	0	0	0	0	1	0	0	0	0	0	0
2nd PPS/C12H29P2	2nd PPS	Europe	C12	H29	Female	84	24.299999237060547	Ciprofloxacin	245	mg	3	735	30.246914529899772	Skin/Soft Tissue Infections (SSTI)	HAI	Empirical: awaiting culture	No Ventilation	3	3	1	0	0	0	0	0	0	0	0	1	0	0	0	0	0	0
2nd PPS/C12H29P3	2nd PPS	Europe	C12	H29	Female	84	24.299999237060547	Clindamycin	150	mg	4	600	24.69135879991818	Skin/Soft Tissue Infections (SSTI)	HAI	Empirical: awaiting culture	No Ventilation	3	3	1	0	0	0	0	0	0	0	0	1	0	0	0	0	0	0
2nd PPS/C12H29P4	2nd PPS	Europe	C12	H29	Male	17	13	Vancomycin	100	mg	3	300	23.076923076923077	Febrile neutropenia/Fever	HAI	Empirical: awaiting culture	No Ventilation	7	4	2	0	0	0	0	0	2	0	0	0	0	0	1	0	0	0
2nd PPS/C12H29P5	2nd PPS	Europe	C12	H29	Male	17	13	Amikacin	260	mg	1	260	20	Febrile neutropenia/Fever	HAI	Empirical: awaiting culture	No Ventilation	7	4	2	0	0	0	0	0	2	0	0	0	0	0	1	0	0	0
2nd PPS/C12H29P6	2nd PPS	Europe	C12	H29	Male	17	13	Meropenem	255	mg	3	765	58.84615384615385	Febrile neutropenia/Fever	HAI	Empirical: awaiting culture	No Ventilation	7	4	2	0	0	0	0	0	2	0	0	0	0	0	1	0	0	0
2nd PPS/C12H29P7	2nd PPS	Europe	C12	H29	Male	96	21	Ciprofloxacin	200	mg	3	600	28.571428571428573	Joint/Bone Infections	HAI	Targeted	No Ventilation	2	2	1	0	0	0	0	0	1	0	0	0	0	0	0	0	0	0
2nd PPS/C12H29P8	2nd PPS	Europe	C12	H29	Male	48	18	Pip-taz	1890	mg	4	7560	420	Other	HAI	Empirical: awaiting culture	No Ventilation	3	3	1	0	0	0	0	0	1	0	0	0	0	0	0	0	0	0
2nd PPS/C12H29P9	2nd PPS	Europe	C12	H29	Male	48	18	Amikacin	360	mg	1	360	20	Other	HAI	Empirical: awaiting culture	No Ventilation	3	3	1	0	0	0	0	0	1	0	0	0	0	0	0	0	0	0
2nd PPS/C12H29P10	2nd PPS	Europe	C12	H29	Male	9	8.960000038146973	Vancomycin	190	mg	3	570	63.61607115772762	Sepsis	HAI	Targeted	No Ventilation	2	1	1	0	0	1	0	0	0	0	0	0	0	0	0	0	0	0
2nd PPS/C12H29P11	2nd PPS	Europe	C12	H29	Male	132	32	Pip-taz	2520	mg	4	10080	315	Febrile neutropenia/Fever	HAI	Empirical: awaiting culture	No Ventilation	2	2	3	0	0	1	1	0	0	0	0	0	0	1	0	0	0	0
2nd PPS/C12H29P12	2nd PPS	Europe	C12	H29	Male	132	32	Vancomycin	480	mg	2	960	30	Febrile neutropenia/Fever	HAI	Empirical: awaiting culture	No Ventilation	2	2	3	0	0	1	1	0	0	0	0	0	0	1	0	0	0	0
2nd PPS/C12H29P13	2nd PPS	Europe	C12	H29	Female	1	3	Vancomycin	45	mg	3	135	45	Sepsis	HAI	Targeted	No Ventilation	2	2	1	0	0	1	0	0	0	0	0	0	0	0	0	0	0	0
2nd PPS/C12H29P14	2nd PPS	Europe	C12	H29	Female	1	3	Meropenem	112	mg	3	336	112	Sepsis	HAI	Targeted	No Ventilation	2	2	1	0	0	1	0	0	0	0	0	0	0	0	0	0	0	0
2nd PPS/C12H29P15	2nd PPS	Europe	C12	H29	Male	120	33	Meropenem	669	mg	3	2007	60.81818181818182	Cardiac Infections	HAI	Empirical: awaiting culture	No Ventilation	2	2	1	0	0	1	0	0	0	0	0	0	0	0	0	0	0	0
2nd PPS/C12H29P16	2nd PPS	Europe	C12	H29	Male	120	33	Vancomycin	450	mg	3	1350	40.90909090909091	Cardiac Infections	HAI	Empirical: awaiting culture	No Ventilation	2	2	1	0	0	1	0	0	0	0	0	0	0	0	0	0	0	0
2nd PPS/C12H29P17	2nd PPS	Europe	C12	H29	Female	60	24.5	Amikacin	490	mg	1	490	20	Bacterial LRTI	HAI	Empirical: awaiting culture	No Ventilation	2	2	2	0	0	1	0	0	0	0	0	0	1	0	0	0	0	0
2nd PPS/C12H29P18	2nd PPS	Europe	C12	H29	Female	60	24.5	Pip-taz	1890	mg	4	7560	308.57142857142856	Bacterial LRTI	HAI	Empirical: awaiting culture	No Ventilation	2	2	2	0	0	1	0	0	0	0	0	0	1	0	0	0	0	0
2nd PPS/C12H29P19	2nd PPS	Europe	C12	H29	Male	108	26	Cefotaxime	1300	mg	3	3900	150	Central Nervous System (CNS) infections	CAI	Empirical: awaiting culture	Invasive Ventilation	3	2	2	0	0	0	1	0	0	0	0	0	2	0	0	0	0	0
2nd PPS/C12H29P20	2nd PPS	Europe	C12	H29	Female	9	5.300000190734863	Meropenem	210	mg	3	630	118.86792025051764	Bacterial LRTI	HAI	Targeted	Invasive Ventilation	1	1	3	0	0	1	0	0	0	0	0	0	0	4	0	0	0	1
2nd PPS/C12H29P21	2nd PPS	Europe	C12	H29	Female	72	28.700000762939453	Ciprofloxacin	250	mg	2	500	17.421602324333527	GI tract infections	HAI	Targeted	Non-Invasive Ventilation	3	3	3	0	0	0	1	1	0	0	1	0	0	0	0	0	0	0
2nd PPS/C12H29P22	2nd PPS	Europe	C12	H29	Male	3	5.099999904632568	Amikacin	100	mg	1	100	19.607843503911702	Febrile neutropenia/Fever	CAI	Empirical: awaiting culture	Invasive Ventilation	6	3	3	0	0	1	0	0	1	0	0	0	1	0	0	0	0	0
2nd PPS/C12H29P23	2nd PPS	Europe	C12	H29	Male	3	5.099999904632568	Cefotaxime	250	mg	3	750	147.05882627933775	Febrile neutropenia/Fever	CAI	Empirical: awaiting culture	Invasive Ventilation	6	3	3	0	0	1	0	0	1	0	0	0	1	0	0	0	0	0
2nd PPS/C12H29P24	2nd PPS	Europe	C12	H29	Female	21	8	Amikacin	160	mg	1	160	20	Bacterial LRTI	CAI	Empirical: pathogen determined	Invasive Ventilation	2	2	2	0	0	0	0	0	0	0	0	0	0	0	0	1	0	1
2nd PPS/C12H29P25	2nd PPS	Europe	C12	H29	Female	21	8	Pip-taz	720	mg	3	2160	270	Bacterial LRTI	CAI	Empirical: pathogen determined	Invasive Ventilation	2	2	2	0	0	0	0	0	0	0	0	0	0	0	0	1	0	1
2nd PPS/C12H29P26	2nd PPS	Europe	C12	H29	Male	10	6.800000190734863	Vancomycin	100	mg	3	300	44.11764582135689	Skin/Soft Tissue Infections (SSTI)	HAI	Targeted	Non-Invasive Ventilation	3	2	2	0	0	0	0	0	0	0	0	0	0	1	0	0	0	1
2nd PPS/C12H29P27	2nd PPS	Europe	C12	H29	Male	132	33	Meropenem	660	mg	3	1980	60	Bacterial LRTI	HAI	Empirical: no culture	No Ventilation	2	2	3	0	0	2	0	0	0	0	1	0	0	0	1	0	0	0
2nd PPS/C12H29P28	2nd PPS	Europe	C12	H29	Male	132	33	Vancomycin	495	mg	3	1485	45	Bacterial LRTI	HAI	Empirical: no culture	No Ventilation	2	2	3	0	0	2	0	0	0	0	1	0	0	0	1	0	0	0
2nd PPS/C12H29P29	2nd PPS	Europe	C12	H29	Male	132	48.75	Ciprofloxacin	400	mg	3	1200	24.615384615384617	Febrile neutropenia/Fever	Unknown	Empirical: pathogen determined	No Ventilation	6	4	1	0	0	0	0	0	0	1	0	0	0	0	0	0	0	0
2nd PPS/C12H29P30	2nd PPS	Europe	C12	H29	Male	132	48.75	Teicoplanin	400	mg	1	400	8.205128205128204	Febrile neutropenia/Fever	Unknown	Empirical: pathogen determined	No Ventilation	6	4	1	0	0	0	0	0	0	1	0	0	0	0	0	0	0	0
2nd PPS/C12H29P31	2nd PPS	Europe	C12	H29	Male	132	48.75	Pip-taz	4500	mg	4	18000	369.2307692307692	Febrile neutropenia/Fever	Unknown	Empirical: pathogen determined	No Ventilation	6	4	1	0	0	0	0	0	0	1	0	0	0	0	0	0	0	0
2nd PPS/C12H29P32	2nd PPS	Europe	C12	H29	Male	132	44	Vancomycin	440	mg	3	1320	30	Febrile neutropenia/Fever	CAI	Empirical: no culture	Invasive Ventilation	3	2	0	0	0	0	0	0	0	0	0	0	0	0	0	0	0	0
2nd PPS/C12H29P33	2nd PPS	Europe	C12	H29	Male	132	44	Pip-taz	4500	mg	4	18000	409.09090909090907	Febrile neutropenia/Fever	CAI	Empirical: no culture	Invasive Ventilation	3	2	0	0	0	0	0	0	0	0	0	0	0	0	0	0	0	0
2nd PPS/C12H29P34	2nd PPS	Europe	C12	H29	Female	36	10	Vancomycin	150	mg	3	450	45	Sepsis	HAI	Targeted	No Ventilation	4	4	1	0	0	1	0	0	0	0	0	0	0	0	0	0	0	0
2nd PPS/C12H29P35	2nd PPS	Europe	C12	H29	Female	36	10	Ciprofloxacin	100	mg	2	200	20	Sepsis	HAI	Targeted	No Ventilation	4	4	1	0	0	1	0	0	0	0	0	0	0	0	0	0	0	0
2nd PPS/C12H29P36	2nd PPS	Europe	C12	H29	Female	36	10	Meropenem	400	mg	3	1200	120	Sepsis	HAI	Targeted	No Ventilation	4	4	1	0	0	1	0	0	0	0	0	0	0	0	0	0	0	0
2nd PPS/C12H29P37	2nd PPS	Europe	C12	H29	Female	9	8.649999618530273	Teicoplanin	80	mg	1	80	9.248555321161142	Febrile neutropenia/Fever	HAI	Empirical: pathogen determined	No Ventilation	2	1	1	0	0	0	0	0	0	1	0	0	0	0	0	0	0	0
2nd PPS/C12H29P38	2nd PPS	Europe	C12	H29	Female	12	10.600000381469727	Amikacin	200	mg	1	200	18.867923849288513	Bacterial LRTI	CAI	Empirical: awaiting culture	No Ventilation	7	5	1	0	0	0	0	0	0	1	0	0	0	0	0	0	0	0
2nd PPS/C12H29P39	2nd PPS	Europe	C12	H29	Female	12	10.600000381469727	Meropenem	200	mg	3	600	56.60377154786554	Bacterial LRTI	CAI	Empirical: awaiting culture	No Ventilation	7	5	1	0	0	0	0	0	0	1	0	0	0	0	0	0	0	0
2nd PPS/C12H29P40	2nd PPS	Europe	C12	H29	Male	16	8.75	Meropenem	180	mg	3	540	61.714285714285715	Bacterial LRTI	CAI	Empirical: awaiting culture	No Ventilation	7	3	2	0	0	0	0	0	0	1	0	0	0	0	1	0	0	0
2nd PPS/C12H29P41	2nd PPS	Europe	C12	H29	Male	16	8.75	Teicoplanin	88	mg	1	88	10.057142857142857	Bacterial LRTI	CAI	Empirical: awaiting culture	No Ventilation	7	3	2	0	0	0	0	0	0	1	0	0	0	0	1	0	0	0
2nd PPS/C12H29P42	2nd PPS	Europe	C12	H29	Female	9	6.900000095367432	Amikacin	140	mg	1	140	20.28985479203024	Bacterial LRTI	Unknown	Empirical: awaiting culture	No Ventilation	2	2	3	0	0	0	0	0	0	0	0	0	0	1	0	0	0	2
2nd PPS/C12H29P43	2nd PPS	Europe	C12	H29	Female	9	6.900000095367432	Meropenem	140	mg	3	420	60.86956437609072	Bacterial LRTI	Unknown	Empirical: awaiting culture	No Ventilation	2	2	3	0	0	0	0	0	0	0	0	0	0	1	0	0	0	2
2nd PPS/C12H29P44	2nd PPS	Europe	C12	H29	Female	24	9.5	Amikacin	200	mg	1	200	21.05263157894737	Febrile neutropenia/Fever	Unknown	Empirical: awaiting culture	No Ventilation	5	4	2	0	0	0	0	0	1	0	0	0	0	0	1	0	0	0
2nd PPS/C12H29P45	2nd PPS	Europe	C12	H29	Female	24	9.5	Meropenem	360	mg	2	720	75.78947368421052	Febrile neutropenia/Fever	Unknown	Empirical: awaiting culture	No Ventilation	5	4	2	0	0	0	0	0	1	0	0	0	0	0	1	0	0	0
2nd PPS/C12H29P46	2nd PPS	Europe	C12	H29	Male	120	30	Amikacin	600	mg	1	600	20	Febrile neutropenia/Fever	Unknown	Empirical: awaiting culture	No Ventilation	5	3	2	0	0	0	0	0	1	0	0	0	0	0	1	0	0	0
2nd PPS/C12H29P47	2nd PPS	Europe	C12	H29	Male	120	30	Meropenem	600	mg	3	1800	60	Febrile neutropenia/Fever	Unknown	Empirical: awaiting culture	No Ventilation	5	3	2	0	0	0	0	0	1	0	0	0	0	0	1	0	0	0
2nd PPS/C12H29P48	2nd PPS	Europe	C12	H29	Female	48	10	Amikacin	200	mg	1	200	20	Febrile neutropenia/Fever	Unknown	Empirical: awaiting culture	No Ventilation	4	3	2	0	0	0	0	0	0	1	0	0	0	0	1	0	0	0
2nd PPS/C12H29P49	2nd PPS	Europe	C12	H29	Female	48	10	Meropenem	200	mg	3	600	60	Febrile neutropenia/Fever	Unknown	Empirical: awaiting culture	No Ventilation	4	3	2	0	0	0	0	0	0	1	0	0	0	0	1	0	0	0
2nd PPS/C12H29P50	2nd PPS	Europe	C12	H29	Male	13	10	Pip-taz	900	mg	4	3600	360	Sepsis	CAI	Targeted	No Ventilation	4	2	1	0	0	0	0	0	1	0	0	0	0	0	0	0	0	0
2nd PPS/C12H29P51	2nd PPS	Europe	C12	H29	Male	24	16.149999618530273	Pip-taz	1440	mg	4	5760	356.65635517359766	Febrile neutropenia/Fever	HAI	Empirical: pathogen determined	No Ventilation	2	2	1	0	0	0	0	0	0	1	0	0	0	0	0	0	0	0
2nd PPS/C12H29P52	2nd PPS	Europe	C12	H29	Male	24	16.149999618530273	Ciprofloxacin	160	mg	3	480	29.72136293113314	Febrile neutropenia/Fever	HAI	Empirical: pathogen determined	No Ventilation	2	2	1	0	0	0	0	0	0	1	0	0	0	0	0	0	0	0
2nd PPS/C12H29P53	2nd PPS	Europe	C12	H29	Male	12	8.229999542236328	Meropenem	150	mg	3	450	54.67801033166547	Febrile neutropenia/Fever	HAI	Empirical: awaiting culture	No Ventilation	6	3	3	0	0	1	0	0	1	0	0	0	0	0	0	0	0	1
2nd PPS/C12H29P54	2nd PPS	Europe	C12	H29	Male	96	38.599998474121094	Clindamycin	150	mg	4	600	15.544042065241603	Skin/Soft Tissue Infections (SSTI)	Unknown	Unknown	No Ventilation	3	2	1	0	0	0	0	0	0	1	0	0	0	0	0	0	0	0
2nd PPS/C12H29P55	2nd PPS	Europe	C12	H29	Female	120	6.5	Teicoplanin	65	mg	1	65	10	Febrile neutropenia/Fever	HAI	Empirical: awaiting culture	No Ventilation	3	2	1	0	0	0	0	0	1	0	0	0	0	0	0	0	0	0
2nd PPS/C12H29P56	2nd PPS	Europe	C12	H29	Female	120	6.5	Meropenem	130	mg	3	390	60	Febrile neutropenia/Fever	HAI	Empirical: awaiting culture	No Ventilation	3	2	1	0	0	0	0	0	1	0	0	0	0	0	0	0	0	0
2nd PPS/C12H29P57	2nd PPS	Europe	C12	H29	Female	13	9.199999809265137	Cefuroxime	696	mg	3	2088	226.95652644440457	Skin/Soft Tissue Infections (SSTI)	HAI	Targeted	No Ventilation	2	2	1	0	0	0	0	0	0	0	0	0	0	0	1	0	0	0
2nd PPS/C12H29P58	2nd PPS	Europe	C12	H29	Male	14	12.399999618530273	Pip-taz	1080	mg	4	4320	348.3871074918657	Febrile neutropenia/Fever	CAI	Empirical: pathogen determined	No Ventilation	3	2	2	0	0	0	0	0	0	1	0	0	0	0	1	0	0	0
2nd PPS/C12H29P59	2nd PPS	Europe	C12	H29	Male	14	12.399999618530273	Teicoplanin	125	mg	1	125	10.08064547140815	Febrile neutropenia/Fever	CAI	Empirical: pathogen determined	No Ventilation	3	2	2	0	0	0	0	0	0	1	0	0	0	0	1	0	0	0
2nd PPS/C12H29P60	2nd PPS	Europe	C12	H29	Female	7	6.300000190734863	Amikacin	125	mg	1	125	19.84126924056797	Sepsis	CAI	Empirical: no culture	No Ventilation	3	3	1	0	0	0	0	0	0	0	0	0	0	0	0	0	1	0
2nd PPS/C12H29P61	2nd PPS	Europe	C12	H29	Female	7	6.300000190734863	Metronidazole	50	mg	3	150	23.809523088681566	Sepsis	CAI	Empirical: no culture	No Ventilation	3	3	1	0	0	0	0	0	0	0	0	0	0	0	0	0	1	0
2nd PPS/C12H29P62	2nd PPS	Europe	C12	H29	Female	7	6.300000190734863	Meropenem	255	mg	3	765	121.428567752276	Sepsis	CAI	Empirical: no culture	No Ventilation	3	3	1	0	0	0	0	0	0	0	0	0	0	0	0	0	1	0
2nd PPS/C12H29P63	2nd PPS	Europe	C12	H29	Male	48	14.75	Amikacin	300	mg	1	300	20.338983050847457	Febrile neutropenia/Fever	HAI	Empirical: awaiting culture	No Ventilation	6	4	2	0	0	0	0	0	1	0	0	0	0	0	1	0	0	0
2nd PPS/C12H29P64	2nd PPS	Europe	C12	H29	Female	120	22.799999237060547	Meropenem	890	mg	3	2670	117.10526707650125	Central Nervous System (CNS) infections	HAI	Empirical: pathogen determined	Non-Invasive Ventilation	3	3	3	0	1	0	1	2	0	0	0	0	0	0	0	0	0	1
2nd PPS/C12H29P65	2nd PPS	Europe	C12	H29	Female	36	10	Vancomycin	150	mg	4	600	60	Central Nervous System (CNS) infections	HAI	Empirical: pathogen determined	No Ventilation	3	3	1	0	0	0	0	0	0	0	0	0	0	0	1	0	0	0
2nd PPS/C12H29P66	2nd PPS	Europe	C12	H29	Female	36	10	Metronidazole	75	mg	3	225	22.5	Central Nervous System (CNS) infections	HAI	Empirical: pathogen determined	No Ventilation	3	3	1	0	0	0	0	0	0	0	0	0	0	0	1	0	0	0
2nd PPS/C12H29P67	2nd PPS	Europe	C12	H29	Female	36	10	Ceftriaxone	800	mg	1	800	80	Central Nervous System (CNS) infections	HAI	Empirical: pathogen determined	No Ventilation	3	3	1	0	0	0	0	0	0	0	0	0	0	0	1	0	0	0
2nd PPS/C12H29P68	2nd PPS	Europe	C12	H29	Male	11	11.5	Co-amoxiclav	345	mg	3	1035	90	Bacterial LRTI	CAI	Empirical: awaiting culture	No Ventilation	1	1	1	0	0	0	0	0	0	0	0	0	2	0	0	0	0	0
2nd PPS/C12H29P69	2nd PPS	Europe	C12	H29	Male	11	8.600000381469727	Vancomycin	140	mg	4	560	65.11627618140837	Central Nervous System (CNS) infections	HAI	Targeted	No Ventilation	2	2	3	0	0	0	0	1	0	0	0	0	1	0	0	1	0	0
2nd PPS/C12H29P70	2nd PPS	Europe	C12	H29	Male	11	8.600000381469727	Cefuroxime	686	mg	3	2058	239.30231496667574	Central Nervous System (CNS) infections	HAI	Targeted	No Ventilation	2	2	3	0	0	0	0	1	0	0	0	0	1	0	0	1	0	0
2nd PPS/C12H29P71	2nd PPS	Europe	C12	H29	Male	20	11.699999809265137	Ciprofloxacin	220	mg	2	440	37.60683821990899	Other	CAI	Targeted	No Ventilation	3	2	2	0	1	0	0	0	1	0	0	0	0	0	1	0	0	0
2nd PPS/C12H29P72	2nd PPS	Europe	C12	H29	Female	108	26.200000762939453	Teicoplanin	160	mg	1	160	6.106870051176638	CRBSI	HAI	Targeted	No Ventilation	3	2	0	0	0	0	0	0	0	0	0	0	0	0	0	0	0	0
2nd PPS/C12H29P73	2nd PPS	Europe	C12	H29	Male	84	17.200000762939453	Meropenem	360	mg	2	720	41.8604632594768	Febrile neutropenia/Fever	HAI	Empirical: awaiting culture	No Ventilation	9	4	3	0	0	0	0	0	1	0	0	0	1	0	1	0	0	0
2nd PPS/C12H29P74	2nd PPS	Europe	C12	H29	Male	84	17.200000762939453	Vancomycin	140	mg	2	280	16.27906904535209	Febrile neutropenia/Fever	HAI	Empirical: awaiting culture	No Ventilation	9	4	3	0	0	0	0	0	1	0	0	0	1	0	1	0	0	0
2nd PPS/C12H29P75	2nd PPS	Europe	C12	H29	Male	84	17.200000762939453	Amikacin	360	mg	1	360	20.9302316297384	Febrile neutropenia/Fever	HAI	Empirical: awaiting culture	No Ventilation	9	4	3	0	0	0	0	0	1	0	0	0	1	0	1	0	0	0
2nd PPS/C12H29P76	2nd PPS	Europe	C12	H29	Male	48	23	Amikacin	470	mg	1	470	20.434782608695652	Febrile neutropenia/Fever	HAI	Empirical: awaiting culture	No Ventilation	6	3	2	0	0	0	0	0	1	0	0	0	0	0	1	0	0	0
2nd PPS/C12H29P77	2nd PPS	Europe	C12	H29	Male	48	23	Pip-taz	1890	mg	4	7560	328.69565217391306	Febrile neutropenia/Fever	HAI	Empirical: awaiting culture	No Ventilation	6	3	2	0	0	0	0	0	1	0	0	0	0	0	1	0	0	0
2nd PPS/C12H31P1	2nd PPS	Europe	C12	H31	Male	12	11.760000228881836	Ceftriaxone	580	mg	1	580	49.31972693125938	Sepsis	CAI	Empirical: awaiting culture	No Ventilation	1	1	0	0	0	0	0	0	0	0	0	0	0	0	0	0	0	0
2nd PPS/C12H31P2	2nd PPS	Europe	C12	H31	Female	108	23.350000381469727	Pip-taz	2100	mg	3	6300	269.8072761060682	Urinary Tract Infections (UTI)	HAI	Empirical: no culture	No Ventilation	2	2	2	0	0	0	0	0	0	1	0	0	0	0	1	0	0	0
2nd PPS/C12H31P3	2nd PPS	Europe	C12	H31	Male	24	12.600000381469727	Co-amoxiclav	378	mg	3	1134	89.99999727521632	Skin/Soft Tissue Infections (SSTI)	CAI	Empirical: pathogen determined	No Ventilation	1	1	1	0	0	0	0	0	0	0	0	0	0	0	2	0	0	0
2nd PPS/C12H31P4	2nd PPS	Europe	C12	H31	Female	24	13.699999809265137	Ceftriaxone	1000	mg	1	1000	72.99270174614985	Central Nervous System (CNS) infections	HAI	Empirical: awaiting culture	No Ventilation	2	2	3	0	0	1	0	0	0	0	0	0	2	1	0	0	0	0
2nd PPS/C12H31P5	2nd PPS	Europe	C12	H31	Female	96	23.399999618530273	Ceftriaxone	1800	mg	1	1800	76.92307817708657	Treatment for Surgical disease	HAI	Targeted	No Ventilation	1	1	1	0	0	0	0	0	0	0	0	0	2	0	0	0	0	0
2nd PPS/C12H31P6	2nd PPS	Europe	C12	H31	Male	96	29.5	Co-amoxiclav	885	mg	3	2655	90	GI tract infections	CAI	Empirical: awaiting culture	No Ventilation	1	1	1	0	0	0	0	1	0	0	0	0	0	0	0	0	0	0
2nd PPS/C12H31P7	2nd PPS	Europe	C12	H31	Female	120	44.25	Co-amoxiclav	1200	mg	3	3600	81.35593220338983	Treatment for Surgical disease	HAI	Empirical: awaiting culture	No Ventilation	1	1	0	0	0	0	0	0	0	0	0	0	0	0	0	0	0	0
2nd PPS/C12H31P8	2nd PPS	Europe	C12	H31	Female	36	15.449999809265137	Co-amoxiclav	460	mg	3	1380	89.32038945220144	GI tract infections	CAI	Empirical: pathogen determined	No Ventilation	1	1	1	0	0	0	0	1	0	0	0	0	0	0	0	0	0	0
2nd PPS/C12H31P9	2nd PPS	Europe	C12	H31	Male	14	10.600000381469727	Ceftriaxone	500	mg	1	500	47.16980962322128	Central Nervous System (CNS) infections	CAI	Empirical: awaiting culture	No Ventilation	1	1	0	0	0	0	0	0	0	0	0	0	0	0	0	0	0	0
2nd PPS/C12H31P10	2nd PPS	Europe	C12	H31	Male	36	14	Ceftriaxone	1120	mg	1	1120	80	Sepsis	CAI	Targeted	Invasive Ventilation	1	1	0	0	0	0	0	0	0	0	0	0	0	0	0	0	0	0
2nd PPS/C12H31P11	2nd PPS	Europe	C12	H31	Male	9	10.600000381469727	Clindamycin	50	mg	4	200	18.867923849288513	Sepsis	CAI	Empirical: pathogen determined	No Ventilation	2	2	0	0	0	0	0	0	0	0	0	0	0	0	0	0	0	0
2nd PPS/C12H31P12	2nd PPS	Europe	C12	H31	Male	9	10.600000381469727	Ceftriaxone	850	mg	1	850	80.18867635947619	Sepsis	CAI	Empirical: pathogen determined	No Ventilation	2	2	0	0	0	0	0	0	0	0	0	0	0	0	0	0	0	0
2nd PPS/C12H31P13	2nd PPS	Europe	C12	H31	Male	72	22.899999618530273	Pip-taz	2000	mg	3	6000	262.0087379890132	Bacterial LRTI	HAI	Empirical: awaiting culture	No Ventilation	1	1	2	0	0	0	0	0	0	0	0	0	1	0	0	1	0	0
2nd PPS/C12H31P14	2nd PPS	Europe	C12	H31	Female	108	46.900001525878906	Metronidazole	350	mg	3	1050	22.38805897310305	Skin/Soft Tissue Infections (SSTI)	CAI	Empirical: pathogen determined	No Ventilation	2	2	0	0	0	0	0	0	0	0	0	0	0	0	0	0	0	0
2nd PPS/C12H31P15	2nd PPS	Europe	C12	H31	Female	108	46.900001525878906	Ceftriaxone	3700	mg	1	3700	78.8912554290298	Skin/Soft Tissue Infections (SSTI)	CAI	Empirical: pathogen determined	No Ventilation	2	2	0	0	0	0	0	0	0	0	0	0	0	0	0	0	0	0
2nd PPS/C12H31P16	2nd PPS	Europe	C12	H31	Male	1	5	Co-amoxiclav	150	mg	2	300	60	Urinary Tract Infections (UTI)	CAI	Targeted	No Ventilation	1	1	0	0	0	0	0	0	0	0	0	0	0	0	0	0	0	0
2nd PPS/C12H25P1	2nd PPS	Europe	C12	H25	Male	16	5.099999904632568	Co-amoxiclav	150	mg	3	450	88.23529576760265	Bacterial LRTI	CAI	Empirical: awaiting culture	No Ventilation	1	1	3	0	0	0	0	0	0	0	0	0	0	0	0	1	0	2
2nd PPS/C12H25P2	2nd PPS	Europe	C12	H25	Male	24	13.300000190734863	Ceftriaxone	663	mg	1	663	49.849623345258564	Lymphadenitis	CAI	Empirical: pathogen determined	No Ventilation	1	1	0	0	0	0	0	0	0	0	0	0	0	0	0	0	0	0
2nd PPS/C12H25P3	2nd PPS	Europe	C12	H25	Male	2	7.099999904632568	Ceftriaxone	570	mg	1	570	80.28169121919137	Sepsis	CAI	Empirical: pathogen determined	No Ventilation	1	1	0	0	0	0	0	0	0	0	0	0	0	0	0	0	0	0
2nd PPS/C12H30P1	2nd PPS	Europe	C12	H30	Female	24	14.899999618530273	Cefuroxime	750	mg	3	2250	151.00671527546916	Joint/Bone Infections	CAI	Empirical: pathogen determined	No Ventilation	1	1	0	0	0	0	0	0	0	0	0	0	0	0	0	0	0	0
2nd PPS/C12H30P2	2nd PPS	Europe	C12	H30	Female	108	24.700000762939453	Ceftriaxone	1980	mg	1	1980	80.16194084377703	Sepsis	CAI	Empirical: pathogen determined	No Ventilation	1	1	1	0	0	0	0	0	0	1	0	0	0	0	0	0	0	0
2nd PPS/C12H30P3	2nd PPS	Europe	C12	H30	Male	48	20.299999237060547	Ceftriaxone	1000	mg	1	1000	49.26108559523279	Sepsis	CAI	Empirical: pathogen determined	No Ventilation	1	1	0	0	0	0	0	0	0	0	0	0	0	0	0	0	0	0
2nd PPS/C12H24P1	2nd PPS	Europe	C12	H24	Male	22	8.5	Ceftriaxone	712	mg	1	712	83.76470588235294	Bacterial LRTI	Unknown	Empirical: pathogen determined	No Ventilation	1	1	1	0	0	0	0	1	0	0	0	0	0	0	0	0	0	0
2nd PPS/C12H24P2	2nd PPS	Europe	C12	H24	Female	14	10.5	Cefotaxime	500	mg	3	1500	142.85714285714286	Bacterial LRTI	Unknown	Empirical: no culture	No Ventilation	1	1	0	0	0	0	0	0	0	0	0	0	0	0	0	0	0	0
2nd PPS/C12H24P3	2nd PPS	Europe	C12	H24	Female	24	10.5	Ceftriaxone	840	mg	1	840	80	Central Nervous System (CNS) infections	CAI	Empirical: no culture	No Ventilation	1	1	0	0	0	0	0	0	0	0	0	0	0	0	0	0	0	0
2nd PPS/C12H24P4	2nd PPS	Europe	C12	H24	Male	36	15.850000381469727	Ceftazidime	790	mg	3	2370	149.52681028139108	Cardiac Infections	Unknown	Empirical: pathogen determined	No Ventilation	2	2	0	0	0	0	0	0	0	0	0	0	0	0	0	0	0	0
2nd PPS/C12H24P5	2nd PPS	Europe	C12	H24	Male	24	11.050000190734863	Cefuroxime	552	mg	4	2208	199.8190010757964	Bacterial LRTI	CAI	Empirical: awaiting culture	No Ventilation	2	2	1	0	0	0	0	0	0	0	0	0	0	0	0	0	1	0
2nd PPS/C12H24P6	2nd PPS	Europe	C12	H24	Male	2	5.670000076293945	Ceftriaxone	450	mg	1	450	79.36507829716491	Sepsis	Unknown	Empirical: awaiting culture	No Ventilation	3	2	3	0	0	0	0	0	0	0	0	0	0	0	2	1	0	0
2nd PPS/C12H24P7	2nd PPS	Europe	C12	H24	Female	48	11.300000190734863	Pip-taz	1012.5	mg	3	3037.5	268.80530519729706	Bacterial LRTI	Unknown	Targeted	Non-Invasive Ventilation	1	1	3	0	0	0	0	1	0	0	0	0	1	0	1	0	0	0
2nd PPS/C12H24P8	2nd PPS	Europe	C12	H24	Male	21	15.5	Ceftriaxone	1212	mg	1	1212	78.19354838709677	Sepsis	CAI	Empirical: pathogen determined	No Ventilation	1	1	2	0	0	0	0	0	0	0	0	0	0	0	1	0	0	1
2nd PPS/C12H24P9	2nd PPS	Europe	C12	H24	Male	108	39	Ceftriaxone	3120	mg	1	3120	80	Other	CAI	Empirical: pathogen determined	No Ventilation	1	1	1	0	0	0	0	0	0	0	0	0	1	0	0	0	0	0
2nd PPS/C12H24P10	2nd PPS	Europe	C12	H24	Female	18	11.75	Ceftazidime	590	mg	3	1770	150.63829787234042	Bacterial LRTI	CAI	Targeted	No Ventilation	2	2	1	0	0	0	0	0	0	0	0	0	0	0	0	0	0	1
2nd PPS/C12H24P11	2nd PPS	Europe	C12	H24	Female	7	5.5	Ceftriaxone	430	mg	1	430	78.18181818181819	Bacterial LRTI	CAI	Empirical: pathogen determined	Invasive Ventilation	1	1	2	0	0	0	0	0	0	0	0	0	0	1	0	0	0	1
2nd PPS/C12H24P12	2nd PPS	Europe	C12	H24	Female	11	6.46999979019165	Meropenem	130	mg	3	390	60.278209064431465	Bacterial LRTI	HAI	Targeted	Invasive Ventilation	1	1	3	0	0	1	0	0	0	0	0	0	0	1	0	0	0	1
2nd PPS/C12H24P13	2nd PPS	Europe	C12	H24	Female	36	14	Cefuroxime	200	mg	4	800	57.142857142857146	Bacterial LRTI	CAI	Empirical: pathogen determined	Invasive Ventilation	1	1	1	0	0	0	0	0	0	0	0	0	0	0	0	0	0	1
2nd PPS/C12H24P14	2nd PPS	Europe	C12	H24	Female	60	19	Co-amoxiclav	700	mg	3	2100	110.52631578947368	Other	CAI	Empirical: pathogen determined	No Ventilation	1	1	0	0	0	0	0	0	0	0	0	0	0	0	0	0	0	0
2nd PPS/C12H24P15	2nd PPS	Europe	C12	H24	Male	48	16.84000015258789	Pip-taz	1500	mg	4	6000	356.2945335887036	Bacterial LRTI	CAI	Empirical: awaiting culture	No Ventilation	3	2	1	0	0	0	0	0	0	1	0	0	0	0	0	0	0	0
2nd PPS/C12H24P16	2nd PPS	Europe	C12	H24	Female	36	15.199999809265137	Gentamicin	110	mg	1	110	7.236842196073559	Febrile neutropenia/Fever	CAI	Empirical: pathogen determined	No Ventilation	4	3	1	0	0	0	0	0	0	1	0	0	0	0	0	0	0	0
2nd PPS/C12H24P17	2nd PPS	Europe	C12	H24	Female	36	15.199999809265137	Clindamycin	150	mg	4	600	39.47368470585578	Febrile neutropenia/Fever	CAI	Empirical: pathogen determined	No Ventilation	4	3	1	0	0	0	0	0	0	1	0	0	0	0	0	0	0	0
2nd PPS/C12H24P18	2nd PPS	Europe	C12	H24	Female	36	15.199999809265137	Meropenem	300	mg	3	900	59.21052705878367	Febrile neutropenia/Fever	CAI	Empirical: pathogen determined	No Ventilation	4	3	1	0	0	0	0	0	0	1	0	0	0	0	0	0	0	0
2nd PPS/C12H34P1	2nd PPS	Europe	C12	H34	Female	2	3.609999895095825	Gentamicin	25	mg	1	25	6.925207957474578	GI tract infections	HAI	Empirical: awaiting culture	No Ventilation	2	2	3	0	0	1	0	0	0	0	0	0	0	0	1	0	0	1
2nd PPS/C12H34P2	2nd PPS	Europe	C12	H34	Female	2	3.609999895095825	Co-amoxiclav	108	mg	2	216	59.833796752580355	GI tract infections	HAI	Empirical: awaiting culture	No Ventilation	2	2	3	0	0	1	0	0	0	0	0	0	0	0	1	0	0	1
2nd PPS/C12H34P3	2nd PPS	Europe	C12	H34	Male	9	8	Ceftazidime	400	mg	3	1200	150	Bacterial LRTI	CAI	Targeted	Non-Invasive Ventilation	3	3	1	0	0	0	0	0	0	0	0	0	0	0	0	0	0	1
2nd PPS/C12H34P4	2nd PPS	Europe	C12	H34	Female	1	3.0999999046325684	Cefotaxime	155	mg	2	310	100.00000307636886	Sepsis	CAI	Empirical: pathogen determined	Invasive Ventilation	3	2	1	0	0	1	0	0	0	0	0	0	0	0	0	0	0	0
2nd PPS/C12H34P5	2nd PPS	Europe	C12	H34	Female	72	25	Co-amoxiclav	750	mg	3	2250	90	Bacterial LRTI	CAI	Empirical: pathogen determined	Invasive Ventilation	2	2	1	0	0	0	0	0	0	0	0	0	0	0	1	0	0	0
2nd PPS/C12H34P6	2nd PPS	Europe	C12	H34	Female	72	25	Gentamicin	200	mg	1	200	8	Bacterial LRTI	CAI	Empirical: pathogen determined	Invasive Ventilation	2	2	1	0	0	0	0	0	0	0	0	0	0	0	1	0	0	0
2nd PPS/C12H34P7	2nd PPS	Europe	C12	H34	Female	72	16.899999618530273	Co-amoxiclav	507	mg	3	1521	90.00000203149563	Urinary Tract Infections (UTI)	CAI	Empirical: pathogen determined	No Ventilation	1	1	1	0	0	0	0	0	0	0	0	0	0	0	1	0	0	0
2nd PPS/C12H34P8	2nd PPS	Europe	C12	H34	Male	5	4.570000171661377	Co-amoxiclav	137	mg	3	411	89.93435110760295	Bacterial LRTI	CAI	Empirical: pathogen determined	No Ventilation	1	1	2	0	0	1	0	0	0	0	0	0	0	0	0	0	0	1
2nd PPS/C12H34P9	2nd PPS	Europe	C12	H34	Male	72	15.600000381469727	Pip-taz	1400	mg	4	5600	358.9743501962918	Bacterial LRTI	HAI	Empirical: pathogen determined	Non-Invasive Ventilation	2	2	3	0	0	0	0	0	0	0	0	0	1	0	0	1	0	1
2nd PPS/C12H34P10	2nd PPS	Europe	C12	H34	Male	72	15.600000381469727	Gentamicin	125	mg	1	125	8.012820316881514	Bacterial LRTI	HAI	Empirical: pathogen determined	Non-Invasive Ventilation	2	2	3	0	0	0	0	0	0	0	0	0	1	0	0	1	0	1
2nd PPS/C12H34P11	2nd PPS	Europe	C12	H34	Female	2	3.9000000953674316	Co-amoxiclav	120	mg	3	360	92.30769005047505	Bacterial LRTI	HAI	Empirical: pathogen determined	No Ventilation	1	1	1	0	0	1	0	0	0	0	0	0	0	0	0	0	0	0
2nd PPS/C12H34P12	2nd PPS	Europe	C12	H34	Female	5	4.650000095367432	Co-amoxiclav	140	mg	3	420	90.32257879272423	Bacterial LRTI	CAI	Empirical: pathogen determined	No Ventilation	1	1	2	0	0	1	0	0	0	0	1	0	0	0	0	0	0	0
2nd PPS/C12H23P1	2nd PPS	Europe	C12	H23	Female	84	34.70000076293945	Co-amoxiclav	1000	mg	3	3000	86.45532951123396	Treatment for Surgical disease	HAI	Empirical: awaiting culture	No Ventilation	1	1	1	0	0	0	0	0	0	0	0	0	0	0	1	0	0	0
2nd PPS/C12H23P2	2nd PPS	Europe	C12	H23	Female	24	5.449999809265137	Ceftriaxone	430	mg	1	430	78.8990853300562	Central Nervous System (CNS) infections	CAI	Empirical: pathogen determined	No Ventilation	1	1	0	0	0	0	0	0	0	0	0	0	0	0	0	0	0	0
2nd PPS/C12H23P3	2nd PPS	Europe	C12	H23	Female	1	3.5	Ceftriaxone	280	mg	1	280	80	Sepsis	CAI	Empirical: awaiting culture	No Ventilation	1	1	0	0	0	0	0	0	0	0	0	0	0	0	0	0	0	0
2nd PPS/C12H27P1	2nd PPS	Europe	C12	H27	Female	36	15	Gentamicin	105	mg	1	105	7	Bacterial LRTI	CAI	Empirical: no culture	No Ventilation	3	3	3	0	0	0	0	1	0	0	0	0	0	0	1	0	0	1
2nd PPS/C12H27P2	2nd PPS	Europe	C12	H27	Female	36	15	Pip-taz	1340	mg	3	4020	268	Bacterial LRTI	CAI	Empirical: no culture	No Ventilation	3	3	3	0	0	0	0	1	0	0	0	0	0	0	1	0	0	1
2nd PPS/C12H27P3	2nd PPS	Europe	C12	H27	Female	84	22	Gentamicin	160	mg	1	160	7.2727272727272725	Febrile neutropenia/Fever	HAI	Empirical: no culture	No Ventilation	5	3	1	0	0	0	0	0	1	0	0	0	0	0	0	0	0	0
2nd PPS/C12H27P4	2nd PPS	Europe	C12	H27	Female	84	22	Meropenem	450	mg	3	1350	61.36363636363637	Febrile neutropenia/Fever	HAI	Empirical: no culture	No Ventilation	5	3	1	0	0	0	0	0	1	0	0	0	0	0	0	0	0	0
2nd PPS/C12H27P5	2nd PPS	Europe	C12	H27	Female	84	22	Teicoplanin	220	mg	1	220	10	Febrile neutropenia/Fever	HAI	Empirical: no culture	No Ventilation	5	3	1	0	0	0	0	0	1	0	0	0	0	0	0	0	0	0
2nd PPS/C12H27P6	2nd PPS	Europe	C12	H27	Male	36	13	Teicoplanin	125	mg	1	125	9.615384615384615	Febrile neutropenia/Fever	HAI	Empirical: no culture	No Ventilation	5	3	1	0	0	0	0	0	1	0	0	0	0	0	0	0	0	0
2nd PPS/C12H27P7	2nd PPS	Europe	C12	H27	Male	36	13	Pip-taz	1125	mg	4	4500	346.15384615384613	Febrile neutropenia/Fever	HAI	Empirical: no culture	No Ventilation	5	3	1	0	0	0	0	0	1	0	0	0	0	0	0	0	0	0
2nd PPS/C12H27P8	2nd PPS	Europe	C12	H27	Male	36	13	Amikacin	185	mg	1	185	14.23076923076923	Febrile neutropenia/Fever	HAI	Empirical: no culture	No Ventilation	5	3	1	0	0	0	0	0	1	0	0	0	0	0	0	0	0	0
2nd PPS/C12H27P9	2nd PPS	Europe	C12	H27	Male	36	10	Meropenem	400	mg	3	1200	120	Sepsis	HAI	Empirical: no culture	No Ventilation	4	2	1	0	0	0	0	0	1	0	0	0	0	0	0	0	0	0
2nd PPS/C12H27P10	2nd PPS	Europe	C12	H27	Male	36	10	Amikacin	150	mg	1	150	15	Sepsis	HAI	Empirical: no culture	No Ventilation	4	2	1	0	0	0	0	0	1	0	0	0	0	0	0	0	0	0
2nd PPS/C12H27P11	2nd PPS	Europe	C12	H27	Female	1	1.0399999618530273	Vancomycin	16	mg	2	32	30.769231897839468	Sepsis	Unknown	Empirical: awaiting culture	Non-Invasive Ventilation	2	2	3	0	0	0	0	0	0	0	0	0	0	0	2	1	0	0
2nd PPS/C12H27P12	2nd PPS	Europe	C12	H27	Female	1	1.0399999618530273	Pip-taz	94	mg	3	282	271.1538560997103	Sepsis	Unknown	Empirical: awaiting culture	Non-Invasive Ventilation	2	2	3	0	0	0	0	0	0	0	0	0	0	0	2	1	0	0
2nd PPS/C12H27P13	2nd PPS	Europe	C12	H27	Female	48	13	Ceftriaxone	665	mg	1	665	51.15384615384615	Sepsis	CAI	Empirical: awaiting culture	No Ventilation	1	1	1	1	0	0	0	0	0	0	0	0	0	0	1	0	0	0
2nd PPS/C12H27P14	2nd PPS	Europe	C12	H27	Male	96	30	Gentamicin	210	mg	1	210	7	Febrile neutropenia/Fever	CAI	Empirical: awaiting culture	No Ventilation	5	3	1	0	0	0	0	0	0	1	0	0	0	0	0	0	0	0
2nd PPS/C12H27P15	2nd PPS	Europe	C12	H27	Male	96	30	Pip-taz	2700	mg	4	10800	360	Febrile neutropenia/Fever	CAI	Empirical: awaiting culture	No Ventilation	5	3	1	0	0	0	0	0	0	1	0	0	0	0	0	0	0	0
2nd PPS/C12H33P1	2nd PPS	Europe	C12	H33	Male	120	24	Gentamicin	168	mg	1	168	7	Urinary Tract Infections (UTI)	HAI	Empirical: awaiting culture	No Ventilation	3	2	0	0	0	0	0	0	0	0	0	0	0	0	0	0	0	0
2nd PPS/C12H33P2	2nd PPS	Europe	C12	H33	Male	120	24	Ceftriaxone	1200	mg	1	1200	50	Central Nervous System (CNS) infections	CAI	Empirical: awaiting culture	No Ventilation	3	2	0	0	0	0	0	0	0	0	0	0	0	0	0	0	0	0
2nd PPS/C12H33P3	2nd PPS	Europe	C12	H33	Male	1	3.940000057220459	Cefotaxime	175	mg	3	525	133.24872902930116	Other	HAI	Empirical: pathogen determined	No Ventilation	3	2	3	1	0	1	0	0	0	0	0	0	0	1	0	0	1	0
2nd PPS/C12H33P4	2nd PPS	Europe	C12	H33	Male	1	3.940000057220459	Gentamicin	9	mg	1	9	2.284263926216591	Other	HAI	Empirical: pathogen determined	No Ventilation	3	2	3	1	0	1	0	0	0	0	0	0	0	1	0	0	1	0
2nd PPS/C12H33P5	2nd PPS	Europe	C12	H33	Male	120	42.79999923706055	Gentamicin	300	mg	1	300	7.009345919338938	Treatment for Surgical disease	CAI	Empirical: pathogen determined	No Ventilation	2	2	0	0	0	0	0	0	0	0	0	0	0	0	0	0	0	0
2nd PPS/C12H33P6	2nd PPS	Europe	C12	H33	Male	120	42.79999923706055	Co-amoxiclav	1200	mg	3	3600	84.11215103206726	Treatment for Surgical disease	CAI	Empirical: pathogen determined	No Ventilation	2	2	0	0	0	0	0	0	0	0	0	0	0	0	0	0	0	0
2nd PPS/C12H33P7	2nd PPS	Europe	C12	H33	Female	48	16.899999618530273	Pip-taz	1600	mg	4	6400	378.6982334001131	Febrile neutropenia/Fever	CAI	Empirical: awaiting culture	No Ventilation	2	2	1	0	0	0	0	0	1	0	0	0	0	0	0	0	0	0
2nd PPS/C12H33P8	2nd PPS	Europe	C12	H33	Male	120	18.899999618530273	Gentamicin	47	mg	3	141	7.460317610893403	Cardiac Infections	CAI	Targeted	No Ventilation	2	2	2	0	0	1	0	0	0	0	0	0	0	1	0	0	0	0
2nd PPS/C12H33P9	2nd PPS	Europe	C12	H33	Female	3	4.71999979019165	Cefotaxime	236	mg	3	708	150.00000666763853	Viral LRTI	CAI	Empirical: pathogen determined	No Ventilation	2	2	0	0	0	0	0	0	0	0	0	0	0	0	0	0	0	0
2nd PPS/C12H33P10	2nd PPS	Europe	C12	H33	Male	48	18.299999237060547	Ceftriaxone	1500	mg	1	1500	81.96721653202313	Sepsis	CAI	Empirical: pathogen determined	No Ventilation	1	1	0	0	0	0	0	0	0	0	0	0	0	0	0	0	0	0
2nd PPS/C12H33P11	2nd PPS	Europe	C12	H33	Male	2	4.860000133514404	Cefotaxime	240	mg	3	720	148.14814407820757	Urinary Tract Infections (UTI)	HAI	Targeted	Non-Invasive Ventilation	2	2	2	0	0	1	0	0	0	0	0	0	0	0	0	0	0	1
2nd PPS/C12H33P12	2nd PPS	Europe	C12	H33	Male	1	4.699999809265137	Meropenem	180	mg	4	720	153.1914955785019	Central Nervous System (CNS) infections	CAI	Empirical: pathogen determined	No Ventilation	2	2	1	0	0	0	0	0	0	0	0	0	1	0	0	0	0	0
2nd PPS/C12H33P13	2nd PPS	Europe	C12	H33	Male	1	4.699999809265137	Vancomycin	80	mg	4	320	68.08510914600085	Central Nervous System (CNS) infections	CAI	Empirical: pathogen determined	No Ventilation	2	2	1	0	0	0	0	0	0	0	0	0	1	0	0	0	0	0
2nd PPS/C12H33P14	2nd PPS	Europe	C12	H33	Female	2	3.4000000953674316	Meropenem	136	mg	3	408	119.99999663409075	Sepsis	HAI	Targeted	Invasive Ventilation	1	1	2	0	0	1	0	0	0	0	0	0	0	0	0	0	0	1
2nd PPS/C12H33P15	2nd PPS	Europe	C12	H33	Male	6	6.449999809265137	Meropenem	130	mg	3	390	60.46511806710171	Skin/Soft Tissue Infections (SSTI)	HAI	Targeted	Invasive Ventilation	1	1	2	0	0	2	0	0	0	0	0	0	0	1	0	0	0	0
2nd PPS/C12H33P16	2nd PPS	Europe	C12	H33	Male	9	9.5	Co-amoxiclav	280	mg	3	840	88.42105263157895	Skin/Soft Tissue Infections (SSTI)	CAI	Empirical: pathogen determined	No Ventilation	1	1	0	0	0	0	0	0	0	0	0	0	0	0	0	0	0	0
2nd PPS/C12H33P17	2nd PPS	Europe	C12	H33	Female	132	53.900001525878906	Ceftriaxone	2700	mg	1	2700	50.09276296038051	Central Nervous System (CNS) infections	CAI	Empirical: awaiting culture	No Ventilation	1	1	1	0	0	0	0	0	0	0	0	0	1	0	0	0	0	0
2nd PPS/C12H33P18	2nd PPS	Europe	C12	H33	Male	10	12.300000190734863	Co-amoxiclav	370	mg	3	1110	90.24390103962129	Lymphadenitis	CAI	Empirical: awaiting culture	No Ventilation	1	1	0	0	0	0	0	0	0	0	0	0	0	0	0	0	0	0
2nd PPS/C12H32P26	2nd PPS	Europe	C12	H32	Female	36	13	Co-amoxiclav	420	mg	3	1260	96.92307692307692	Bacterial LRTI	CAI	Empirical: pathogen determined	Non-Invasive Ventilation	1	1	0	0	0	0	0	0	0	0	0	0	0	0	0	0	0	0
2nd PPS/C12H32P27	2nd PPS	Europe	C12	H32	Male	84	22	Co-amoxiclav	1110	mg	3	3330	151.36363636363637	Bacterial LRTI	CAI	Empirical: pathogen determined	Non-Invasive Ventilation	2	2	1	0	0	0	0	0	0	0	0	0	2	0	0	0	0	0
2nd PPS/C12H32P28	2nd PPS	Europe	C12	H32	Female	36	12	Cefotaxime	800	mg	4	3200	266.6666666666667	Central Nervous System (CNS) infections	CAI	Empirical: pathogen determined	Non-Invasive Ventilation	3	3	2	0	0	0	0	0	0	0	0	0	2	0	0	0	0	1
2nd PPS/C12H32P29	2nd PPS	Europe	C12	H32	Male	48	15.199999809265137	Co-amoxiclav	510	mg	4	2040	134.21052799990966	Bacterial LRTI	CAI	Empirical: pathogen determined	No Ventilation	1	1	0	0	0	0	0	0	0	0	0	0	0	0	0	0	0	0
2nd PPS/C12H32P30	2nd PPS	Europe	C12	H32	Male	10	6.400000095367432	Co-amoxiclav	190	mg	4	760	118.74999823048714	Bacterial LRTI	CAI	Empirical: pathogen determined	No Ventilation	1	1	2	0	0	0	0	0	0	0	0	0	0	0	0	1	0	1
2nd PPS/C12H32P31	2nd PPS	Europe	C12	H32	Male	48	21	Pip-taz	1890	mg	4	7560	360	Febrile neutropenia/Fever	CAI	Empirical: pathogen determined	No Ventilation	2	2	1	0	0	0	0	0	0	1	0	0	0	0	0	0	0	0
2nd PPS/C12H32P32	2nd PPS	Europe	C12	H32	Male	48	21	Teicoplanin	210	mg	1	210	10	Febrile neutropenia/Fever	CAI	Empirical: pathogen determined	No Ventilation	2	2	1	0	0	0	0	0	0	1	0	0	0	0	0	0	0	0
2nd PPS/C12H32P33	2nd PPS	Europe	C12	H32	Female	15	8.300000190734863	Pip-taz	750	mg	4	3000	361.4457748264686	Febrile neutropenia/Fever	CAI	Empirical: pathogen determined	No Ventilation	2	2	1	0	0	0	0	0	0	1	0	0	0	0	0	0	0	0
2nd PPS/C12H32P34	2nd PPS	Europe	C12	H32	Female	15	8.300000190734863	Amikacin	62	mg	2	124	14.93975869282737	Febrile neutropenia/Fever	CAI	Empirical: pathogen determined	No Ventilation	2	2	1	0	0	0	0	0	0	1	0	0	0	0	0	0	0	0
2nd PPS/C12H32P35	2nd PPS	Europe	C12	H32	Male	36	15	Gentamicin	108	mg	1	108	7.2	Febrile neutropenia/Fever	Unknown	Empirical: pathogen determined	No Ventilation	6	3	1	0	0	0	0	0	0	1	0	0	0	0	0	0	0	0
2nd PPS/C12H32P36	2nd PPS	Europe	C12	H32	Male	36	15	Vancomycin	270	mg	4	1080	72	Febrile neutropenia/Fever	Unknown	Empirical: pathogen determined	No Ventilation	6	3	1	0	0	0	0	0	0	1	0	0	0	0	0	0	0	0
2nd PPS/C12H32P37	2nd PPS	Europe	C12	H32	Male	36	15	Meropenem	310	mg	3	930	62	Febrile neutropenia/Fever	Unknown	Empirical: pathogen determined	No Ventilation	6	3	1	0	0	0	0	0	0	1	0	0	0	0	0	0	0	0
2nd PPS/C12H32P38	2nd PPS	Europe	C12	H32	Female	120	28	Pip-taz	2500	mg	4	10000	357.14285714285717	Febrile neutropenia/Fever	CAI	Empirical: pathogen determined	No Ventilation	2	2	1	0	0	0	0	0	1	0	0	0	0	0	0	0	0	0
2nd PPS/C12H32P39	2nd PPS	Europe	C12	H32	Male	60	18	Gentamicin	126	mg	1	126	7	Febrile neutropenia/Fever	Unknown	Empirical: pathogen determined	No Ventilation	3	2	1	0	0	0	0	0	0	1	0	0	0	0	0	0	0	0
2nd PPS/C12H32P40	2nd PPS	Europe	C12	H32	Male	60	18	Ceftriaxone	900	mg	1	900	50	Febrile neutropenia/Fever	Unknown	Empirical: pathogen determined	No Ventilation	3	2	1	0	0	0	0	0	0	1	0	0	0	0	0	0	0	0
2nd PPS/C12H32P41	2nd PPS	Europe	C12	H32	Female	17	10.600000381469727	Ceftriaxone	530	mg	1	530	49.99999820061456	Joint/Bone Infections	CAI	Empirical: awaiting culture	No Ventilation	1	1	0	0	0	0	0	0	0	0	0	0	0	0	0	0	0	0
2nd PPS/C12H32P42	2nd PPS	Europe	C12	H32	Male	17	11	Co-amoxiclav	330	mg	3	990	90	Treatment for Surgical disease	CAI	Empirical: awaiting culture	No Ventilation	1	1	0	0	0	0	0	0	0	0	0	0	0	0	0	0	0	0
2nd PPS/C12H32P43	2nd PPS	Europe	C12	H32	Male	2	5.949999809265137	Ceftriaxone	475	mg	1	475	79.83193533222408	Sepsis	CAI	Targeted	No Ventilation	1	1	0	0	0	0	0	0	0	0	0	0	0	0	0	0	0	0
2nd PPS/C12H32P44	2nd PPS	Europe	C12	H32	Male	24	12	Ceftriaxone	600	mg	1	600	50	Sepsis	CAI	Empirical: awaiting culture	No Ventilation	1	1	0	0	0	0	0	0	0	0	0	0	0	0	0	0	0	0
2nd PPS/C12H32P45	2nd PPS	Europe	C12	H32	Male	84	23	Pip-taz	2070	mg	4	8280	360	Skin/Soft Tissue Infections (SSTI)	CAI	Empirical: pathogen determined	No Ventilation	1	1	0	0	0	0	0	0	0	0	0	0	0	0	0	0	0	0
2nd PPS/C12H32P46	2nd PPS	Europe	C12	H32	Male	24	15.199999809265137	Metronidazole	114	mg	3	342	22.500000282337794	Treatment for Surgical disease	CAI	Targeted	No Ventilation	3	3	0	0	0	0	0	0	0	0	0	0	0	0	0	0	0	0
2nd PPS/C12H32P47	2nd PPS	Europe	C12	H32	Male	24	15.199999809265137	Gentamicin	105	mg	1	105	6.907894823524762	Treatment for Surgical disease	CAI	Targeted	No Ventilation	3	3	0	0	0	0	0	0	0	0	0	0	0	0	0	0	0	0
2nd PPS/C12H29P78	2nd PPS	Europe	C12	H29	Male	132	28.100000381469727	Clindamycin	102	mg	4	408	14.519572756627136	Skin/Soft Tissue Infections (SSTI)	CAI	Empirical: awaiting culture	No Ventilation	3	3	2	0	0	0	0	0	1	0	0	0	0	0	0	0	1	0
2nd PPS/C12H29P79	2nd PPS	Europe	C12	H29	Female	84	27	Amikacin	540	mg	1	540	20	Urinary Tract Infections (UTI)	CAI	Empirical: awaiting culture	No Ventilation	1	1	1	0	0	0	0	0	0	0	0	0	0	0	0	0	1	0
2nd PPS/C12H28P1	2nd PPS	Europe	C12	H28	Female	60	18.600000381469727	Co-amoxiclav	558	mg	3	1674	89.99999815417878	Bacterial LRTI	CAI	Empirical: pathogen determined	No Ventilation	2	1	0	0	0	0	0	0	0	0	0	0	0	0	0	0	0	0
2nd PPS/C12H28P2	2nd PPS	Europe	C12	H28	Female	36	17.700000762939453	Co-amoxiclav	530	mg	3	1590	89.83050460252903	Viral LRTI	CAI	Empirical: pathogen determined	Non-Invasive Ventilation	1	1	1	0	0	0	0	0	0	0	0	0	0	0	0	0	0	1
2nd PPS/C12H28P3	2nd PPS	Europe	C12	H28	Male	96	26.5	Gentamicin	132	mg	1	132	4.981132075471698	Treatment for Surgical disease	CAI	Empirical: pathogen determined	No Ventilation	3	3	0	0	0	0	0	0	0	0	0	0	0	0	0	0	0	0
2nd PPS/C12H28P4	2nd PPS	Europe	C12	H28	Male	96	26.5	Metronidazole	200	mg	3	600	22.641509433962263	Treatment for Surgical disease	CAI	Empirical: pathogen determined	No Ventilation	3	3	0	0	0	0	0	0	0	0	0	0	0	0	0	0	0	0
2nd PPS/C12H28P5	2nd PPS	Europe	C12	H28	Male	36	13.899999618530273	Co-amoxiclav	420	mg	3	1260	90.64748450210584	Skin/Soft Tissue Infections (SSTI)	CAI	Empirical: pathogen determined	No Ventilation	1	1	1	0	0	0	0	0	1	0	0	0	0	0	0	0	0	0
2nd PPS/C12H28P6	2nd PPS	Europe	C12	H28	Male	60	21.600000381469727	Teicoplanin	200	mg	1	200	9.25925909573486	CRBSI	HAI	Empirical: pathogen determined	No Ventilation	3	3	1	0	0	0	0	0	0	0	0	0	0	1	0	0	0	0
2nd PPS/C12H28P7	2nd PPS	Europe	C12	H28	Male	60	17	Vancomycin	255	mg	4	1020	60	Febrile neutropenia/Fever	CAI	Empirical: pathogen determined	No Ventilation	3	2	1	0	0	0	0	0	0	1	0	0	0	0	0	0	0	0
2nd PPS/C12H28P8	2nd PPS	Europe	C12	H28	Male	15	11.699999809265137	Vancomycin	175	mg	3	525	44.8717956033005	CRBSI	HAI	Targeted	No Ventilation	3	2	2	0	0	0	0	0	0	1	0	0	0	0	1	0	0	0
3rd PPS/C12H33P19	3rd PPS	Europe	C12	H33	Female	9	7.53000020980835	Co-amoxiclav	225	mg	3	675	89.64143176526947	Bacterial LRTI	CAI	Empirical: awaiting culture	No Ventilation	1	1	2	0	0	0	0	2	0	0	0	0	0	0	0	0	0	1
3rd PPS/C12H33P20	3rd PPS	Europe	C12	H33	Female	108	28	Gentamicin	200	mg	1	200	7.142857142857143	Treatment for Surgical disease	CAI	Empirical: awaiting culture	No Ventilation	2	2	1	0	0	0	0	0	0	0	0	0	0	0	0	0	1	0
3rd PPS/C12H33P21	3rd PPS	Europe	C12	H33	Female	108	28	Co-amoxiclav	800	mg	3	2400	85.71428571428571	Treatment for Surgical disease	HAI	Empirical: awaiting culture	No Ventilation	2	2	1	0	0	0	0	0	0	0	0	0	0	0	0	0	1	0
3rd PPS/C12H33P22	3rd PPS	Europe	C12	H33	Female	2	3.5999999046325684	Meropenem	60	mg	3	180	50.000001324547696	Bacterial LRTI	CAI	Empirical: awaiting culture	Invasive Ventilation	2	2	1	0	0	1	0	0	0	0	0	0	0	0	0	0	0	0
3rd PPS/C12H33P23	3rd PPS	Europe	C12	H33	Female	2	3.5999999046325684	Vancomycin	40	mg	3	120	33.33333421636513	CRBSI	HAI	Empirical: pathogen determined	Invasive Ventilation	2	2	1	0	0	1	0	0	0	0	0	0	0	0	0	0	0	0
3rd PPS/C12H33P24	3rd PPS	Europe	C12	H33	Male	7	5	Pip-taz	450	mg	3	1350	270	Bacterial LRTI	HAI	Empirical: awaiting culture	Non-Invasive Ventilation	2	2	2	0	0	0	0	1	0	0	0	0	0	0	0	0	0	1
3rd PPS/C12H33P25	3rd PPS	Europe	C12	H33	Male	7	5	Vancomycin	90	mg	4	360	72	CRBSI	HAI	Targeted	Non-Invasive Ventilation	2	2	2	0	0	0	0	1	0	0	0	0	0	0	0	0	0	1
3rd PPS/C12H33P26	3rd PPS	Europe	C12	H33	Female	48	16	Pip-taz	1400	mg	3	4200	262.5	Bacterial LRTI	CAI	Empirical: awaiting culture	Invasive Ventilation	1	1	0	0	0	0	0	0	0	0	0	0	0	0	0	0	0	0
3rd PPS/C12H33P27	3rd PPS	Europe	C12	H33	Female	8	10	Co-amoxiclav	300	mg	3	900	90	Bacterial LRTI	CAI	Empirical: pathogen determined	Invasive Ventilation	1	1	0	0	0	0	0	0	0	0	0	0	0	0	0	0	0	0
3rd PPS/C12H33P28	3rd PPS	Europe	C12	H33	Female	1	3.7899999618530273	Vancomycin	60	mg	3	180	47.493404171960314	CRBSI	Unknown	Empirical: pathogen determined	Invasive Ventilation	2	2	2	0	0	0	0	1	0	0	0	0	0	0	0	0	0	1
3rd PPS/C12H33P29	3rd PPS	Europe	C12	H33	Female	1	3.7899999618530273	Meropenem	75	mg	3	225	59.366755214950395	GI tract infections	HAI	Empirical: awaiting culture	Invasive Ventilation	2	2	2	0	0	0	0	1	0	0	0	0	0	0	0	0	0	1
3rd PPS/C12H33P30	3rd PPS	Europe	C12	H33	Female	60	14.5	Co-amoxiclav	435	mg	3	1305	90	Urinary Tract Infections (UTI)	CAI	Targeted	No Ventilation	1	1	0	0	0	0	0	0	0	0	0	0	0	0	0	0	0	0
3rd PPS/C12H33P31	3rd PPS	Europe	C12	H33	Female	72	22.899999618530273	Co-amoxiclav	687	mg	3	2061	90.00000149922603	Treatment for Surgical disease	CAI	Empirical: awaiting culture	No Ventilation	1	1	0	0	0	0	0	0	0	0	0	0	0	0	0	0	0	0
3rd PPS/C12H33P32	3rd PPS	Europe	C12	H33	Male	60	43.20000076293945	Ceftriaxone	3400	mg	1	3400	78.7037023137463	Bacterial LRTI	CAI	Empirical: pathogen determined	No Ventilation	1	1	1	0	0	0	0	0	0	0	0	0	1	0	0	0	0	0
3rd PPS/C12H33P33	3rd PPS	Europe	C12	H33	Female	120	21.200000762939453	Gentamicin	140	mg	1	140	6.60377334725098	Treatment for Surgical disease	Unknown	Empirical: awaiting culture	No Ventilation	1	1	0	0	0	0	0	0	0	0	0	0	0	0	0	0	0	0
3rd PPS/C12H33P34	3rd PPS	Europe	C12	H33	Male	120	25.799999237060547	Pip-taz	2300	mg	3	6900	267.4418683737191	Treatment for Surgical disease	CAI	Targeted	No Ventilation	1	1	0	0	0	0	0	0	0	0	0	0	0	0	0	0	0	0
3rd PPS/C12H33P35	3rd PPS	Europe	C12	H33	Male	3	1.5199999809265137	Cefotaxime	76	mg	4	304	200.0000025096693	Bacterial LRTI	HAI	Empirical: awaiting culture	Invasive Ventilation	2	1	3	0	0	1	0	0	0	0	0	0	0	0	0	1	0	1
3rd PPS/C12H33P36	3rd PPS	Europe	C12	H33	Male	11	9.5	Ceftriaxone	760	mg	1	760	80	Sepsis	CAI	Empirical: pathogen determined	No Ventilation	1	1	0	0	0	0	0	0	0	0	0	0	0	0	0	0	0	0
3rd PPS/C12H33P37	3rd PPS	Europe	C12	H33	Male	2	3.5	Co-amoxiclav	105	mg	2	210	60	Bacterial LRTI	CAI	Empirical: awaiting culture	No Ventilation	1	1	0	0	0	0	0	0	0	0	0	0	0	0	0	0	0	0
3rd PPS/C12H23P4	3rd PPS	Europe	C12	H23	Male	96	25.799999237060547	Co-amoxiclav	750	mg	3	2250	87.20930490447363	Treatment for Surgical disease	CAI	Empirical: awaiting culture	No Ventilation	1	1	1	0	0	0	0	1	0	0	0	0	0	0	0	0	0	0
3rd PPS/C12H23P5	3rd PPS	Europe	C12	H23	Female	5	3.680000066757202	Co-amoxiclav	100	mg	3	300	81.52173765158611	Viral LRTI	CAI	Targeted	No Ventilation	1	1	3	0	0	0	1	0	0	0	1	0	0	0	0	0	0	1
3rd PPS/C12H26P41	3rd PPS	Europe	C12	H26	Female	24	11.050000190734863	Ceftazidime	560	mg	3	1680	152.03619647071466	Bacterial LRTI	CAI	Targeted	No Ventilation	3	3	1	0	0	0	0	0	0	0	0	0	0	0	0	0	0	1
3rd PPS/C12H26P42	3rd PPS	Europe	C12	H26	Female	120	18.549999237060547	Pip-taz	1700	mg	4	6800	366.57683448387763	Bacterial LRTI	CAI	Empirical: pathogen determined	No Ventilation	1	1	3	0	0	0	0	1	0	0	0	0	1	0	0	0	0	1
3rd PPS/C12H26P43	3rd PPS	Europe	C12	H26	Female	8	5.739999771118164	Ciprofloxacin	65	mg	3	195	33.9721267901747	Sepsis	HAI	Targeted	No Ventilation	1	1	3	0	0	1	0	1	0	0	0	0	0	0	0	0	0	1
3rd PPS/C12H26P44	3rd PPS	Europe	C12	H26	Female	8	7.599999904632568	Teicoplanin	75	mg	1	75	9.868421176463945	Sepsis	HAI	Empirical: pathogen determined	Invasive Ventilation	3	2	2	0	0	1	1	0	0	0	0	0	0	0	0	0	0	0
3rd PPS/C12H26P45	3rd PPS	Europe	C12	H26	Female	8	7.599999904632568	Meropenem	150	mg	3	450	59.21052705878367	Sepsis	HAI	Empirical: pathogen determined	Invasive Ventilation	3	2	2	0	0	1	1	0	0	0	0	0	0	0	0	0	0	0
3rd PPS/C12H26P46	3rd PPS	Europe	C12	H26	Male	60	19.600000381469727	Pip-taz	2205	mg	3	6615	337.499993431325	Treatment for Surgical disease	CAI	Empirical: pathogen determined	No Ventilation	1	1	0	0	0	0	0	0	0	0	0	0	0	0	0	0	0	0
3rd PPS/C12H26P47	3rd PPS	Europe	C12	H26	Male	132	47.900001525878906	Pip-taz	4500	mg	3	13500	281.83715177349967	Treatment for Surgical disease	CAI	Empirical: pathogen determined	No Ventilation	1	1	0	0	0	0	0	0	0	0	0	0	0	0	0	0	0	0
3rd PPS/C12H26P48	3rd PPS	Europe	C12	H26	Male	36	18.5	Pip-taz	1700	mg	3	5100	275.6756756756757	Febrile neutropenia/Fever	CAI	Empirical: pathogen determined	No Ventilation	2	2	1	0	0	0	0	0	0	1	0	0	0	0	0	0	0	0
3rd PPS/C12H26P49	3rd PPS	Europe	C12	H26	Male	60	16.5	Pip-taz	1856	mg	3	5568	337.45454545454544	Treatment for Surgical disease	CAI	Empirical: pathogen determined	No Ventilation	1	1	0	0	0	0	0	0	0	0	0	0	0	0	0	0	0	0
3rd PPS/C12H26P50	3rd PPS	Europe	C12	H26	Male	36	16.100000381469727	Pip-taz	1450	mg	4	5800	360.2484386693246	Febrile neutropenia/Fever	CAI	Empirical: pathogen determined	No Ventilation	2	2	1	0	0	0	0	0	0	1	0	0	0	0	0	0	0	0
3rd PPS/C12H26P51	3rd PPS	Europe	C12	H26	Male	84	21.5	Pip-taz	2419	mg	3	7257	337.5348837209302	Treatment for Surgical disease	CAI	Empirical: awaiting culture	No Ventilation	1	1	0	0	0	0	0	0	0	0	0	0	0	0	0	0	0	0
3rd PPS/C12H26P52	3rd PPS	Europe	C12	H26	Female	84	23	Cefotaxime	1150	mg	3	3450	150	Central Nervous System (CNS) infections	HAI	Empirical: awaiting culture	No Ventilation	4	1	2	0	0	0	0	1	0	0	0	0	2	0	0	0	0	0
3rd PPS/C12H26P53	3rd PPS	Europe	C12	H26	Male	3	3.0199999809265137	Ciprofloxacin	28	mg	3	84	27.814569712092986	Treatment for Surgical disease	HAI	Targeted	No Ventilation	1	1	2	0	0	0	0	1	0	0	0	0	0	0	0	1	0	0
3rd PPS/C12H26P54	3rd PPS	Europe	C12	H26	Female	36	12.680000305175781	Pip-taz	1425	mg	3	4275	337.14510229585807	Treatment for Surgical disease	CAI	Targeted	No Ventilation	1	1	0	0	0	0	0	0	0	0	0	0	0	0	0	0	0	0
3rd PPS/C12H26P55	3rd PPS	Europe	C12	H26	Female	36	13.600000381469727	Co-amoxiclav	400	mg	3	1200	88.23529164271378	Lymphadenitis	CAI	Empirical: pathogen determined	No Ventilation	1	1	0	0	0	0	0	0	0	0	0	0	0	0	0	0	0	0
3rd PPS/C12H26P56	3rd PPS	Europe	C12	H26	Female	1	3.375	Cefotaxime	165	mg	3	495	146.66666666666666	GI tract infections	HAI	Empirical: awaiting culture	No Ventilation	2	2	1	0	0	1	0	0	0	0	0	0	0	0	0	0	0	0
3rd PPS/C12H26P57	3rd PPS	Europe	C12	H26	Female	1	3.375	Metronidazole	25	mg	3	75	22.22222222222222	GI tract infections	HAI	Empirical: awaiting culture	No Ventilation	2	2	1	0	0	1	0	0	0	0	0	0	0	0	0	0	0	0
3rd PPS/C12H26P58	3rd PPS	Europe	C12	H26	Female	3	2.369999885559082	Ceftriaxone	188	mg	1	188	79.32489834515367	Sepsis	HAI	Targeted	No Ventilation	1	1	1	0	0	0	0	0	0	0	0	0	0	1	0	0	0	0
3rd PPS/C12H26P59	3rd PPS	Europe	C12	H26	Female	1	3.200000047683716	Cefotaxime	150	mg	3	450	140.62499790452424	Sepsis	CAI	Empirical: pathogen determined	No Ventilation	1	1	0	0	0	0	0	0	0	0	0	0	0	0	0	0	0	0
3rd PPS/C12H26P60	3rd PPS	Europe	C12	H26	Female	2	5	Cefotaxime	250	mg	4	1000	200	Sepsis	CAI	Empirical: pathogen determined	No Ventilation	1	1	0	0	0	0	0	0	0	0	0	0	0	0	0	0	0	0
3rd PPS/C12H26P61	3rd PPS	Europe	C12	H26	Male	4	5.699999809265137	Cefotaxime	280	mg	4	1120	196.49123464521557	Sepsis	CAI	Empirical: pathogen determined	No Ventilation	1	1	0	0	0	0	0	0	0	0	0	0	0	0	0	0	0	0
3rd PPS/C12H26P62	3rd PPS	Europe	C12	H26	Female	13	9.100000381469727	Cefotaxime	455	mg	3	1365	149.99999371203774	Skin/Soft Tissue Infections (SSTI)	CAI	Empirical: awaiting culture	No Ventilation	1	1	1	0	0	0	0	0	0	0	0	0	1	0	0	0	0	0
3rd PPS/C12H26P63	3rd PPS	Europe	C12	H26	Female	60	20.100000381469727	Ceftriaxone	1010	mg	1	1010	50.24875526525478	Bacterial LRTI	CAI	Empirical: awaiting culture	No Ventilation	1	1	0	0	0	0	0	0	0	0	0	0	0	0	0	0	0	0
3rd PPS/C12H26P64	3rd PPS	Europe	C12	H26	Female	22	10.100000381469727	Cefuroxime	600	mg	4	2400	237.62375340135958	Joint/Bone Infections	CAI	Empirical: awaiting culture	No Ventilation	1	1	0	0	0	0	0	0	0	0	0	0	0	0	0	0	0	0
3rd PPS/C12H26P65	3rd PPS	Europe	C12	H26	Female	72	22.600000381469727	Pip-taz	2100	mg	4	8400	371.68140965552186	CRBSI	CAI	Empirical: awaiting culture	No Ventilation	1	1	1	0	1	0	0	2	0	0	0	0	0	0	0	0	0	0
3rd PPS/C12H32P48	3rd PPS	Europe	C12	H32	Male	96	38.79999923706055	Meropenem	1550	mg	3	4650	119.84536318130814	Central Nervous System (CNS) infections	HAI	Empirical: awaiting culture	No Ventilation	2	2	1	0	0	0	0	0	0	1	0	0	0	0	0	0	0	0
3rd PPS/C12H32P49	3rd PPS	Europe	C12	H32	Male	96	38.79999923706055	Vancomycin	540	mg	3	1620	41.752578140584774	Central Nervous System (CNS) infections	HAI	Empirical: awaiting culture	No Ventilation	2	2	1	0	0	0	0	0	0	1	0	0	0	0	0	0	0	0
3rd PPS/C12H32P50	3rd PPS	Europe	C12	H32	Male	24	13	Meropenem	520	mg	3	1560	120	Central Nervous System (CNS) infections	HAI	Empirical: awaiting culture	No Ventilation	1	1	0	0	0	0	0	0	0	0	0	0	0	0	0	0	0	0
3rd PPS/C12H32P51	3rd PPS	Europe	C12	H32	Female	120	50	Pip-taz	4500	mg	4	18000	360	Sepsis	HAI	Empirical: awaiting culture	Non-Invasive Ventilation	1	1	0	0	0	0	0	0	0	0	0	0	0	0	0	0	0	0
3rd PPS/C12H32P52	3rd PPS	Europe	C12	H32	Male	2	1.2000000476837158	Gentamicin	5.800000190734863	mg	1	5.800000190734863	4.8333333002196435	Sepsis	HAI	Empirical: pathogen determined	Invasive Ventilation	3	2	2	0	1	0	0	1	0	0	0	0	0	0	0	1	0	0
3rd PPS/C12H32P53	3rd PPS	Europe	C12	H32	Male	1	1.9500000476837158	Gentamicin	4.800000190734863	mg	1	4.800000190734863	2.4615384991587494	Sepsis	HAI	Empirical: pathogen determined	Non-Invasive Ventilation	2	2	1	0	0	0	0	0	0	0	0	0	0	0	0	1	0	0
3rd PPS/C12H32P54	3rd PPS	Europe	C12	H32	Male	7	3.5	Vancomycin	190	mg	1	190	54.285714285714285	Sepsis	HAI	Empirical: pathogen determined	No Ventilation	2	2	2	0	0	0	0	1	0	0	1	0	0	0	0	0	0	0
3rd PPS/C12H32P55	3rd PPS	Europe	C12	H32	Male	7	3.5	Pip-taz	315	mg	4	1260	360	Sepsis	HAI	Empirical: pathogen determined	No Ventilation	2	2	2	0	0	0	0	1	0	0	1	0	0	0	0	0	0	0
3rd PPS/C12H32P56	3rd PPS	Europe	C12	H32	Female	15	8.699999809265137	Pip-taz	790	mg	3	2370	272.41379907572514	Febrile neutropenia/Fever	CAI	Empirical: pathogen determined	No Ventilation	1	1	0	0	0	0	0	0	0	0	0	0	0	0	0	0	0	0
3rd PPS/C12H32P57	3rd PPS	Europe	C12	H32	Male	36	14.699999809265137	Clindamycin	65	mg	4	260	17.687075059424615	Sepsis	CAI	Targeted	No Ventilation	2	2	0	0	0	0	0	0	0	0	0	0	0	0	0	0	0	0
3rd PPS/C12H32P58	3rd PPS	Europe	C12	H32	Male	60	16.799999237060547	Gentamicin	120	mg	1	120	7.142857467236177	GI tract infections	CAI	Empirical: awaiting culture	No Ventilation	3	3	0	0	0	0	0	0	0	0	0	0	0	0	0	0	0	0
3rd PPS/C12H32P59	3rd PPS	Europe	C12	H32	Male	60	16.799999237060547	Metronidazole	126	mg	3	378	22.500001021793956	GI tract infections	CAI	Empirical: awaiting culture	No Ventilation	3	3	0	0	0	0	0	0	0	0	0	0	0	0	0	0	0	0
3rd PPS/C12H32P60	3rd PPS	Europe	C12	H32	Male	108	32	Gentamicin	225	mg	1	225	7.03125	GI tract infections	CAI	Empirical: awaiting culture	No Ventilation	2	2	1	0	0	0	0	0	1	0	0	0	0	0	0	0	0	0
3rd PPS/C12H29P80	3rd PPS	Europe	C12	H29	Male	17	11.399999618530273	Teicoplanin	110	mg	1	110	9.64912312989898	Febrile neutropenia/Fever	Unknown	Empirical: pathogen determined	No Ventilation	6	5	1	0	0	0	0	0	0	1	0	0	0	0	0	0	0	0
3rd PPS/C12H29P81	3rd PPS	Europe	C12	H29	Male	17	11.399999618530273	Meropenem	230	mg	3	690	60.52631781482087	Febrile neutropenia/Fever	Unknown	Empirical: pathogen determined	No Ventilation	6	5	1	0	0	0	0	0	0	1	0	0	0	0	0	0	0	0
3rd PPS/C12H29P82	3rd PPS	Europe	C12	H29	Male	17	11.399999618530273	Amikacin	225	mg	1	225	19.73684276570246	Febrile neutropenia/Fever	Unknown	Empirical: pathogen determined	No Ventilation	6	5	1	0	0	0	0	0	0	1	0	0	0	0	0	0	0	0
3rd PPS/C12H29P83	3rd PPS	Europe	C12	H29	Female	108	24	Co-amoxiclav	720	mg	3	2160	90	Urinary Tract Infections (UTI)	Unknown	Targeted	No Ventilation	2	1	2	0	0	0	0	1	0	0	0	0	0	0	0	0	1	0
3rd PPS/C12H29P84	3rd PPS	Europe	C12	H29	Female	48	11.5	Meropenem	230	mg	3	690	60	Urinary Tract Infections (UTI)	HAI	Empirical: pathogen determined	Invasive Ventilation	3	2	2	0	0	2	0	0	0	0	0	0	0	0	0	0	0	0
3rd PPS/C12H29P85	3rd PPS	Europe	C12	H29	Female	108	36	Metronidazole	265	mg	3	795	22.083333333333332	GI tract infections	HAI	Empirical: awaiting culture	No Ventilation	2	2	2	0	0	0	0	1	0	0	0	1	0	0	0	0	0	0
3rd PPS/C12H29P86	3rd PPS	Europe	C12	H29	Female	108	36	Ciprofloxacin	255	mg	3	765	21.25	GI tract infections	HAI	Empirical: awaiting culture	No Ventilation	2	2	2	0	0	0	0	1	0	0	0	1	0	0	0	0	0	0
3rd PPS/C12H29P87	3rd PPS	Europe	C12	H29	Male	24	14.050000190734863	Meropenem	270	mg	2	540	38.43416317930713	Febrile neutropenia/Fever	HAI	Empirical: awaiting culture	No Ventilation	4	3	2	0	0	0	0	0	1	0	0	0	0	0	1	0	0	0
3rd PPS/C12H29P88	3rd PPS	Europe	C12	H29	Male	24	14.050000190734863	Amikacin	135	mg	1	135	9.608540794826782	Febrile neutropenia/Fever	HAI	Empirical: awaiting culture	No Ventilation	4	3	2	0	0	0	0	0	1	0	0	0	0	0	1	0	0	0
3rd PPS/C12H29P89	3rd PPS	Europe	C12	H29	Male	11	11	Pip-taz	1080	mg	4	4320	392.72727272727275	Febrile neutropenia/Fever	CAI	Empirical: pathogen determined	No Ventilation	2	2	1	0	0	0	0	0	0	1	0	0	0	0	0	0	0	0
3rd PPS/C12H29P90	3rd PPS	Europe	C12	H29	Female	72	17	Vancomycin	200	mg	3	600	35.294117647058826	Febrile neutropenia/Fever	HAI	Empirical: awaiting culture	No Ventilation	5	3	2	0	0	0	0	0	1	0	0	0	0	0	1	0	0	0
3rd PPS/C12H29P91	3rd PPS	Europe	C12	H29	Female	72	17	Meropenem	320	mg	3	960	56.470588235294116	Febrile neutropenia/Fever	HAI	Empirical: awaiting culture	No Ventilation	5	3	2	0	0	0	0	0	1	0	0	0	0	0	1	0	0	0
3rd PPS/C12H29P92	3rd PPS	Europe	C12	H29	Female	72	17	Amikacin	320	mg	1	320	18.823529411764707	Febrile neutropenia/Fever	HAI	Empirical: awaiting culture	No Ventilation	5	3	2	0	0	0	0	0	1	0	0	0	0	0	1	0	0	0
3rd PPS/C12H29P93	3rd PPS	Europe	C12	H29	Female	24	10.800000190734863	Amikacin	225	mg	1	225	20.833332965403432	Febrile neutropenia/Fever	HAI	Empirical: awaiting culture	No Ventilation	4	2	2	0	0	0	0	0	1	0	0	0	0	0	1	0	0	0
3rd PPS/C12H29P94	3rd PPS	Europe	C12	H29	Female	24	10.800000190734863	Pip-taz	1080	mg	4	4320	399.9999929357459	Febrile neutropenia/Fever	HAI	Empirical: awaiting culture	No Ventilation	4	2	2	0	0	0	0	0	1	0	0	0	0	0	1	0	0	0
3rd PPS/C12H29P95	3rd PPS	Europe	C12	H29	Male	2	5.599999904632568	Clindamycin	43.20000076293945	mg	4	172.8000030517578	30.85714392759364	Skin/Soft Tissue Infections (SSTI)	Unknown	Unknown	No Ventilation	4	3	1	0	0	0	0	0	0	1	0	0	0	0	0	0	0	0
3rd PPS/C12H29P96	3rd PPS	Europe	C12	H29	Male	2	5.599999904632568	Teicoplanin	54	mg	1	54	9.642857307074024	Febrile neutropenia/Fever	CAI	Empirical: pathogen determined	No Ventilation	4	3	1	0	0	0	0	0	0	1	0	0	0	0	0	0	0	0
3rd PPS/C12H29P97	3rd PPS	Europe	C12	H29	Male	2	5.599999904632568	Pip-taz	486	mg	4	1944	347.1428630546649	Febrile neutropenia/Fever	HAI	Empirical: pathogen determined	No Ventilation	4	3	1	0	0	0	0	0	0	1	0	0	0	0	0	0	0	0
3rd PPS/C12H29P98	3rd PPS	Europe	C12	H29	Male	18	13.399999618530273	Amikacin	250	mg	1	250	18.656716949027814	Febrile neutropenia/Fever	HAI	Empirical: awaiting culture	No Ventilation	6	5	1	0	0	0	0	0	0	0	1	0	0	0	0	0	0	0
3rd PPS/C12H29P99	3rd PPS	Europe	C12	H29	Male	18	13.399999618530273	Pip-taz	1080	mg	4	4320	322.38806887920066	Febrile neutropenia/Fever	HAI	Empirical: awaiting culture	No Ventilation	6	5	1	0	0	0	0	0	0	0	1	0	0	0	0	0	0	0
3rd PPS/C12H29P100	3rd PPS	Europe	C12	H29	Male	18	13.399999618530273	Vancomycin	220	mg	1	220	16.41791091514448	Febrile neutropenia/Fever	HAI	Empirical: awaiting culture	No Ventilation	6	5	1	0	0	0	0	0	0	0	1	0	0	0	0	0	0	0
3rd PPS/C12H29P101	3rd PPS	Europe	C12	H29	Female	48	19.299999237060547	Amikacin	380	mg	1	380	19.689119949306033	Unknown	Unknown	Empirical: awaiting culture	No Ventilation	3	3	1	0	0	0	0	0	0	1	0	0	0	0	0	0	0	0
3rd PPS/C12H29P102	3rd PPS	Europe	C12	H29	Female	48	19.299999237060547	Vancomycin	290	mg	3	870	45.077721989200654	Unknown	Unknown	Empirical: awaiting culture	No Ventilation	3	3	1	0	0	0	0	0	0	1	0	0	0	0	0	0	0	0
3rd PPS/C12H29P103	3rd PPS	Europe	C12	H29	Female	48	19.299999237060547	Meropenem	760	mg	3	2280	118.13471969583618	Unknown	Unknown	Empirical: awaiting culture	No Ventilation	3	3	1	0	0	0	0	0	0	1	0	0	0	0	0	0	0	0
3rd PPS/C12H29P104	3rd PPS	Europe	C12	H29	Female	13	7.699999809265137	Vancomycin	150	mg	4	600	77.92207985226717	GI tract infections	CAI	Empirical: awaiting culture	No Ventilation	3	2	0	0	0	0	0	0	0	0	0	0	0	0	0	0	0	0
3rd PPS/C12H29P105	3rd PPS	Europe	C12	H29	Female	13	7.699999809265137	Meropenem	320	mg	3	960	124.67532776362748	GI tract infections	CAI	Empirical: awaiting culture	No Ventilation	3	2	0	0	0	0	0	0	0	0	0	0	0	0	0	0	0	0
3rd PPS/C12H29P106	3rd PPS	Europe	C12	H29	Male	48	13.600000381469727	Pip-taz	1080	mg	4	4320	317.6470499137696	CRBSI	HAI	Empirical: awaiting culture	No Ventilation	4	2	3	0	0	0	1	1	0	0	0	0	2	0	0	0	0	0
3rd PPS/C12H29P107	3rd PPS	Europe	C12	H29	Male	72	18.799999237060547	Meropenem	380	mg	3	1140	60.638300333157005	Febrile neutropenia/Fever	Unknown	Empirical: pathogen determined	No Ventilation	3	2	1	0	0	0	0	0	0	1	0	0	0	0	0	0	0	0
3rd PPS/C12H29P108	3rd PPS	Europe	C12	H29	Male	72	18.799999237060547	Teicoplanin	190	mg	1	190	10.1063833888595	Febrile neutropenia/Fever	Unknown	Empirical: pathogen determined	No Ventilation	3	2	1	0	0	0	0	0	0	1	0	0	0	0	0	0	0	0
3rd PPS/C12H29P109	3rd PPS	Europe	C12	H29	Female	132	57.5	Amikacin	1150	mg	1	1150	20	Skin/Soft Tissue Infections (SSTI)	HAI	Targeted	No Ventilation	3	2	1	0	0	0	0	1	0	0	0	0	0	0	0	0	0	0
3rd PPS/C12H29P110	3rd PPS	Europe	C12	H29	Female	132	57.5	Teicoplanin	400	mg	1	400	6.956521739130435	Skin/Soft Tissue Infections (SSTI)	HAI	Targeted	No Ventilation	3	2	1	0	0	0	0	1	0	0	0	0	0	0	0	0	0	0
3rd PPS/C12H29P111	3rd PPS	Europe	C12	H29	Female	24	15.5	Amikacin	320	mg	1	320	20.64516129032258	Febrile neutropenia/Fever	Unknown	Empirical: pathogen determined	No Ventilation	6	4	1	0	0	0	0	0	0	1	0	0	0	0	0	0	0	0
3rd PPS/C12H29P112	3rd PPS	Europe	C12	H29	Female	24	15.5	Teicoplanin	160	mg	1	160	10.32258064516129	Febrile neutropenia/Fever	Unknown	Empirical: pathogen determined	No Ventilation	6	4	1	0	0	0	0	0	0	1	0	0	0	0	0	0	0	0
3rd PPS/C12H29P113	3rd PPS	Europe	C12	H29	Female	24	15.5	Meropenem	320	mg	3	960	61.935483870967744	Febrile neutropenia/Fever	Unknown	Empirical: pathogen determined	No Ventilation	6	4	1	0	0	0	0	0	0	1	0	0	0	0	0	0	0	0
3rd PPS/C12H29P114	3rd PPS	Europe	C12	H29	Female	24	13.800000190734863	Meropenem	270	mg	3	810	58.69565136265891	Sepsis	Unknown	Targeted	No Ventilation	5	3	1	0	0	0	0	0	0	1	0	0	0	0	0	0	0	0
3rd PPS/C12H29P115	3rd PPS	Europe	C12	H29	Female	24	13.800000190734863	Teicoplanin	140	mg	1	140	10.14492739601512	Sepsis	Unknown	Targeted	No Ventilation	5	3	1	0	0	0	0	0	0	1	0	0	0	0	0	0	0	0
3rd PPS/C12H29P116	3rd PPS	Europe	C12	H29	Male	72	26	Meropenem	530	mg	3	1590	61.15384615384615	Febrile neutropenia/Fever	Unknown	Empirical: pathogen determined	No Ventilation	3	2	1	0	0	0	0	0	0	1	0	0	0	0	0	0	0	0
3rd PPS/C12H29P117	3rd PPS	Europe	C12	H29	Male	18	11	Meropenem	200	mg	3	600	54.54545454545455	Febrile neutropenia/Fever	HAI	Empirical: pathogen determined	No Ventilation	6	2	2	0	0	0	0	0	0	1	0	0	0	0	1	0	0	0
3rd PPS/C12H29P118	3rd PPS	Europe	C12	H29	Male	18	11	Teicoplanin	110	mg	1	110	10	Febrile neutropenia/Fever	Unknown	Empirical: pathogen determined	No Ventilation	6	2	2	0	0	0	0	0	0	1	0	0	0	0	1	0	0	0
3rd PPS/C12H29P119	3rd PPS	Europe	C12	H29	Male	36	12	Amikacin	220	mg	1	220	18.333333333333332	Sepsis	HAI	Empirical: pathogen determined	Invasive Ventilation	5	3	1	0	0	0	0	0	1	0	0	0	0	0	0	0	0	0
3rd PPS/C12H29P120	3rd PPS	Europe	C12	H29	Male	36	12	Vancomycin	130	mg	3	390	32.5	Sepsis	HAI	Empirical: pathogen determined	Invasive Ventilation	5	3	1	0	0	0	0	0	1	0	0	0	0	0	0	0	0	0
3rd PPS/C12H29P121	3rd PPS	Europe	C12	H29	Male	36	12	Ceftazidime	560	mg	3	1680	140	Sepsis	HAI	Empirical: pathogen determined	Invasive Ventilation	5	3	1	0	0	0	0	0	1	0	0	0	0	0	0	0	0	0
3rd PPS/C12H29P122	3rd PPS	Europe	C12	H29	Male	6	3.0999999046325684	Clindamycin	38.5	mg	4	154	49.677420883099366	Sepsis	HAI	Empirical: no culture	Invasive Ventilation	2	2	2	0	0	1	0	0	0	0	0	0	0	0	0	1	0	0
3rd PPS/C12H29P123	3rd PPS	Europe	C12	H29	Male	6	3.0999999046325684	Ciprofloxacin	38.5	mg	3	115.5	37.258065662324526	Sepsis	HAI	Empirical: no culture	Invasive Ventilation	2	2	2	0	0	1	0	0	0	0	0	0	0	0	0	1	0	0
3rd PPS/C12H29P124	3rd PPS	Europe	C12	H29	Male	24	12.100000381469727	Amikacin	240	mg	1	240	19.83471011848418	Febrile neutropenia/Fever	HAI	Empirical: pathogen determined	No Ventilation	7	4	2	0	0	0	0	0	0	1	0	0	0	0	3	0	0	0
3rd PPS/C12H29P125	3rd PPS	Europe	C12	H29	Male	24	12.100000381469727	Vancomycin	295	mg	3	885	73.1404935619104	Febrile neutropenia/Fever	HAI	Empirical: pathogen determined	No Ventilation	7	4	2	0	0	0	0	0	0	1	0	0	0	0	3	0	0	0
3rd PPS/C12H29P126	3rd PPS	Europe	C12	H29	Male	24	12.100000381469727	Meropenem	240	mg	3	720	59.50413035545253	Febrile neutropenia/Fever	HAI	Empirical: pathogen determined	No Ventilation	7	4	2	0	0	0	0	0	0	1	0	0	0	0	3	0	0	0
3rd PPS/C12H29P127	3rd PPS	Europe	C12	H29	Female	20	8.34000015258789	Pip-taz	750	mg	4	3000	359.7122236345648	GI tract infections	HAI	Empirical: pathogen determined	Invasive Ventilation	4	4	2	0	0	1	0	0	0	0	0	0	0	1	0	0	0	0
3rd PPS/C12H29P128	3rd PPS	Europe	C12	H29	Female	20	8.34000015258789	Metronidazole	62	mg	3	186	22.30215786534302	GI tract infections	HAI	Empirical: pathogen determined	Invasive Ventilation	4	4	2	0	0	1	0	0	0	0	0	0	0	1	0	0	0	0
3rd PPS/C12H29P129	3rd PPS	Europe	C12	H29	Female	20	8.34000015258789	Vancomycin	115	mg	3	345	41.36690571797495	GI tract infections	HAI	Empirical: pathogen determined	Invasive Ventilation	4	4	2	0	0	1	0	0	0	0	0	0	0	1	0	0	0	0
3rd PPS/C12H29P130	3rd PPS	Europe	C12	H29	Female	20	8.34000015258789	Amikacin	166	mg	1	166	19.90407637444592	GI tract infections	HAI	Empirical: pathogen determined	Invasive Ventilation	4	4	2	0	0	1	0	0	0	0	0	0	0	1	0	0	0	0
3rd PPS/C12H29P131	3rd PPS	Europe	C12	H29	Female	22	8	Metronidazole	59	mg	3	177	22.125	Other	HAI	Empirical: pathogen determined	Invasive Ventilation	3	3	1	0	0	1	0	0	0	0	0	0	0	0	0	0	0	0
3rd PPS/C12H29P132	3rd PPS	Europe	C12	H29	Female	22	8	Amikacin	158	mg	1	158	19.75	Other	HAI	Empirical: pathogen determined	Invasive Ventilation	3	3	1	0	0	1	0	0	0	0	0	0	0	0	0	0	0	0
3rd PPS/C12H29P133	3rd PPS	Europe	C12	H29	Male	6	6.5	Vancomycin	130	mg	3	390	60	CRBSI	HAI	Targeted	No Ventilation	2	1	1	0	0	0	0	0	0	1	0	0	0	0	0	0	0	0
3rd PPS/C12H29P134	3rd PPS	Europe	C12	H29	Male	6	4	Meropenem	160	mg	3	480	120	Febrile neutropenia/Fever	HAI	Targeted	Invasive Ventilation	3	2	2	0	0	0	0	0	1	0	1	0	0	0	0	0	0	0
3rd PPS/C12H29P135	3rd PPS	Europe	C12	H29	Male	2	2.700000047683716	Pip-taz	245	mg	4	980	362.9629565528065	Sepsis	HAI	Empirical: pathogen determined	No Ventilation	2	2	2	0	0	1	0	0	0	0	0	0	0	1	0	0	0	0
3rd PPS/C12H29P136	3rd PPS	Europe	C12	H29	Male	2	2.700000047683716	Amikacin	54	mg	1	54	19.999999646787295	Sepsis	HAI	Empirical: pathogen determined	No Ventilation	2	2	2	0	0	1	0	0	0	0	0	0	0	1	0	0	0	0
3rd PPS/C12H29P137	3rd PPS	Europe	C12	H29	Female	60	12.399999618530273	Amikacin	250	mg	1	250	20.1612909428163	Bacterial LRTI	HAI	Empirical: pathogen determined	No Ventilation	6	4	3	0	0	1	0	0	0	0	0	0	0	0	1	0	0	1
3rd PPS/C12H29P138	3rd PPS	Europe	C12	H29	Female	60	12.399999618530273	Meropenem	500	mg	3	1500	120.9677456568978	Bacterial LRTI	HAI	Empirical: pathogen determined	No Ventilation	6	4	3	0	0	1	0	0	0	0	0	0	0	0	1	0	0	1
3rd PPS/C12H29P139	3rd PPS	Europe	C12	H29	Male	60	20.399999618530273	Co-amoxiclav	600	mg	3	1800	88.23529576760265	Bacterial LRTI	CAI	Targeted	No Ventilation	1	1	0	0	0	0	0	0	0	0	0	0	0	0	0	0	0	0
3rd PPS/C12H29P140	3rd PPS	Europe	C12	H29	Male	108	24	Amikacin	480	mg	1	480	20	Sepsis	HAI	Empirical: awaiting culture	No Ventilation	3	3	1	0	0	0	0	0	1	0	0	0	0	0	0	0	0	0
3rd PPS/C12H29P141	3rd PPS	Europe	C12	H29	Male	108	24	Pip-taz	1890	mg	4	7560	315	Sepsis	HAI	Empirical: awaiting culture	No Ventilation	3	3	1	0	0	0	0	0	1	0	0	0	0	0	0	0	0	0
3rd PPS/C12H29P142	3rd PPS	Europe	C12	H29	Male	18	10.100000381469727	Meropenem	200	mg	3	600	59.405938350339895	Febrile neutropenia/Fever	HAI	Empirical: pathogen determined	No Ventilation	1	1	1	0	0	0	0	0	0	1	0	0	0	0	0	0	0	0
3rd PPS/C12H29P143	3rd PPS	Europe	C12	H29	Female	84	28	Vancomycin	420	mg	3	1260	45	Cardiac Infections	HAI	Targeted	No Ventilation	3	2	1	0	0	1	0	0	0	0	0	0	0	0	0	0	0	0
3rd PPS/C12H29P144	3rd PPS	Europe	C12	H29	Female	84	28	Pip-taz	2520	mg	4	10080	360	Cardiac Infections	HAI	Targeted	No Ventilation	3	2	1	0	0	1	0	0	0	0	0	0	0	0	0	0	0	0
3rd PPS/C12H29P145	3rd PPS	Europe	C12	H29	Female	48	10	Meropenem	400	mg	3	1200	120	Sepsis	HAI	Empirical: pathogen determined	No Ventilation	2	1	1	0	0	1	0	0	0	0	0	0	0	0	0	0	0	0
3rd PPS/C12H29P146	3rd PPS	Europe	C12	H29	Male	17	9.800000190734863	Meropenem	200	mg	3	600	61.22448860432199	Febrile neutropenia/Fever	HAI	Empirical: pathogen determined	No Ventilation	5	2	2	0	0	0	0	0	1	0	0	0	0	0	1	0	0	0
3rd PPS/C12H29P147	3rd PPS	Europe	C12	H29	Female	3	2.740000009536743	Ciprofloxacin	35	mg	3	105	38.32116774983243	Cardiac Infections	HAI	Empirical: pathogen determined	Non-Invasive Ventilation	4	3	1	0	0	0	0	0	0	0	0	0	0	3	0	0	0	0
3rd PPS/C12H29P148	3rd PPS	Europe	C12	H29	Female	3	2.740000009536743	Meropenem	140	mg	3	420	153.28467099932973	Cardiac Infections	HAI	Empirical: pathogen determined	Non-Invasive Ventilation	4	3	1	0	0	0	0	0	0	0	0	0	0	3	0	0	0	0
3rd PPS/C12H29P149	3rd PPS	Europe	C12	H29	Female	3	2.740000009536743	Vancomycin	63	mg	3	189	68.97810194969838	Cardiac Infections	HAI	Empirical: pathogen determined	Non-Invasive Ventilation	4	3	1	0	0	0	0	0	0	0	0	0	0	3	0	0	0	0
3rd PPS/C12H29P150	3rd PPS	Europe	C12	H29	Male	1	3.200000047683716	Amikacin	48	mg	1	48	14.999999776482586	GI tract infections	HAI	Empirical: pathogen determined	No Ventilation	3	3	1	0	0	1	0	0	0	0	0	0	0	0	0	0	0	0
3rd PPS/C12H29P151	3rd PPS	Europe	C12	H29	Male	1	3.200000047683716	Pip-taz	288	mg	4	1152	359.999994635582	GI tract infections	HAI	Empirical: pathogen determined	No Ventilation	3	3	1	0	0	1	0	0	0	0	0	0	0	0	0	0	0	0
3rd PPS/C12H29P152	3rd PPS	Europe	C12	H29	Male	1	3.200000047683716	Metronidazole	24	mg	3	72	22.499999664723877	GI tract infections	HAI	Empirical: pathogen determined	No Ventilation	3	3	1	0	0	1	0	0	0	0	0	0	0	0	0	0	0	0
3rd PPS/C12H29P153	3rd PPS	Europe	C12	H29	Male	24	13	Meropenem	260	mg	3	780	60	Febrile neutropenia/Fever	CAI	Empirical: pathogen determined	No Ventilation	1	1	1	0	0	0	0	0	0	1	0	0	0	0	0	0	0	0
3rd PPS/C12H29P154	3rd PPS	Europe	C12	H29	Male	3	3.930000066757202	Amikacin	80	mg	1	80	20.356233750909617	Bacterial LRTI	HAI	Empirical: pathogen determined	Invasive Ventilation	2	2	2	0	0	1	0	0	0	0	0	0	0	1	0	0	0	0
3rd PPS/C12H29P155	3rd PPS	Europe	C12	H29	Male	3	3.930000066757202	Pip-taz	350	mg	3	1050	267.1755679806887	Bacterial LRTI	HAI	Empirical: pathogen determined	Invasive Ventilation	2	2	2	0	0	1	0	0	0	0	0	0	0	1	0	0	0	0
3rd PPS/C12H29P156	3rd PPS	Europe	C12	H29	Female	16	10	Vancomycin	130	mg	3	390	39	Skin/Soft Tissue Infections (SSTI)	HAI	Targeted	No Ventilation	3	1	1	0	0	0	0	0	0	0	0	0	1	0	0	0	0	0
3rd PPS/C12H29P157	3rd PPS	Europe	C12	H29	Male	48	20.799999237060547	Teicoplanin	200	mg	2	400	19.230769936149667	Febrile neutropenia/Fever	Unknown	Empirical: pathogen determined	No Ventilation	4	3	1	0	0	0	0	0	0	1	0	0	0	0	0	0	0	0
3rd PPS/C12H29P158	3rd PPS	Europe	C12	H29	Male	48	20.799999237060547	Pip-taz	1890	mg	4	7560	363.46155179322875	Febrile neutropenia/Fever	Unknown	Empirical: pathogen determined	No Ventilation	4	3	1	0	0	0	0	0	0	1	0	0	0	0	0	0	0	0
3rd PPS/C12H29P159	3rd PPS	Europe	C12	H29	Male	48	20.799999237060547	Amikacin	420	mg	1	420	20.19230843295715	Febrile neutropenia/Fever	Unknown	Empirical: pathogen determined	No Ventilation	4	3	1	0	0	0	0	0	0	1	0	0	0	0	0	0	0	0
3rd PPS/C12H29P160	3rd PPS	Europe	C12	H29	Female	6	3.4000000953674316	Vancomycin	50	mg	3	150	44.11764582135689	Sepsis	HAI	Targeted	Non-Invasive Ventilation	3	1	1	0	0	1	0	0	0	0	0	0	0	0	0	0	0	0
3rd PPS/C12H29P161	3rd PPS	Europe	C12	H29	Female	6	4.840000152587891	Amikacin	100	mg	1	100	20.66115637342102	Bacterial LRTI	HAI	Empirical: pathogen determined	Invasive Ventilation	5	3	2	0	0	1	0	0	0	0	0	0	0	2	0	0	0	0
3rd PPS/C12H29P162	3rd PPS	Europe	C12	H29	Female	6	4.840000152587891	Meropenem	190	mg	3	570	117.76859132849981	Bacterial LRTI	HAI	Empirical: pathogen determined	Invasive Ventilation	5	3	2	0	0	1	0	0	0	0	0	0	0	2	0	0	0	0
3rd PPS/C12H29P163	3rd PPS	Europe	C12	H29	Female	6	4.840000152587891	Vancomycin	73	mg	3	219	45.24793245779203	Sepsis	HAI	Empirical: pathogen determined	Invasive Ventilation	5	3	2	0	0	1	0	0	0	0	0	0	0	2	0	0	0	0
3rd PPS/C12H29P164	3rd PPS	Europe	C12	H29	Male	1	3.200000047683716	Amikacin	30	mg	1	30	9.374999860301616	Sepsis	CAI	Empirical: pathogen determined	Invasive Ventilation	8	6	0	0	0	0	0	0	0	0	0	0	0	0	0	0	0	0
3rd PPS/C12H29P165	3rd PPS	Europe	C12	H29	Male	1	3.200000047683716	Metronidazole	24	mg	3	72	22.499999664723877	Sepsis	CAI	Empirical: pathogen determined	Invasive Ventilation	8	6	0	0	0	0	0	0	0	0	0	0	0	0	0	0	0	0
3rd PPS/C12H29P166	3rd PPS	Europe	C12	H29	Male	1	3.200000047683716	Teicoplanin	32	mg	1	32	9.99999985098839	Sepsis	CAI	Empirical: pathogen determined	Invasive Ventilation	8	6	0	0	0	0	0	0	0	0	0	0	0	0	0	0	0	0
3rd PPS/C12H29P167	3rd PPS	Europe	C12	H29	Male	1	3.200000047683716	Meropenem	125	mg	3	375	117.1874982537702	Sepsis	CAI	Empirical: pathogen determined	Invasive Ventilation	8	6	0	0	0	0	0	0	0	0	0	0	0	0	0	0	0	0
3rd PPS/C12H29P168	3rd PPS	Europe	C12	H29	Male	1	3.200000047683716	Ampicillin	160	mg	4	640	199.99999701976782	Sepsis	CAI	Empirical: pathogen determined	Invasive Ventilation	8	6	0	0	0	0	0	0	0	0	0	0	0	0	0	0	0	0
3rd PPS/C12H29P169	3rd PPS	Europe	C12	H29	Male	1	4.699999809265137	Amikacin	50	mg	2	100	21.276596608125264	Pyrexia of Unknown Origin (PUO)	HAI	Empirical: pathogen determined	No Ventilation	2	2	1	0	0	0	1	0	0	0	0	0	0	0	0	0	0	0
3rd PPS/C12H29P170	3rd PPS	Europe	C12	H29	Male	1	4.699999809265137	Pip-taz	435	mg	4	1740	370.21278098137964	Pyrexia of Unknown Origin (PUO)	HAI	Empirical: pathogen determined	No Ventilation	2	2	1	0	0	0	1	0	0	0	0	0	0	0	0	0	0	0
3rd PPS/C12H34P13	3rd PPS	Europe	C12	H34	Male	2	5.900000095367432	Co-amoxiclav	180	mg	2	360	61.01694816626616	Bacterial LRTI	CAI	Empirical: pathogen determined	Invasive Ventilation	1	1	0	0	0	0	0	0	0	0	0	0	0	0	0	0	0	0
3rd PPS/C12H34P14	3rd PPS	Europe	C12	H34	Female	1	2.140000104904175	Gentamicin	16	mg	1	16	7.476635147509233	Bacterial LRTI	CAI	Empirical: pathogen determined	Invasive Ventilation	2	2	1	0	0	0	0	0	0	0	0	0	0	0	0	1	0	0
3rd PPS/C12H34P15	3rd PPS	Europe	C12	H34	Female	108	64	Gentamicin	240	mg	1	240	3.75	Sepsis	HAI	Empirical: pathogen determined	Invasive Ventilation	5	4	1	0	0	1	0	0	0	0	0	0	0	0	0	0	0	0
3rd PPS/C12H34P16	3rd PPS	Europe	C12	H34	Female	108	64	Clindamycin	300	mg	4	1200	18.75	Sepsis	HAI	Empirical: pathogen determined	Invasive Ventilation	5	4	1	0	0	1	0	0	0	0	0	0	0	0	0	0	0	0
3rd PPS/C12H34P17	3rd PPS	Europe	C12	H34	Female	108	64	Co-amoxiclav	1200	mg	2	2400	37.5	Sepsis	HAI	Empirical: pathogen determined	Invasive Ventilation	5	4	1	0	0	1	0	0	0	0	0	0	0	0	0	0	0	0
3rd PPS/C12H34P18	3rd PPS	Europe	C12	H34	Female	11	7.099999904632568	Co-amoxiclav	213	mg	3	639	90.00000120888295	Bacterial LRTI	CAI	Empirical: pathogen determined	No Ventilation	1	1	0	0	0	0	0	0	0	0	0	0	0	0	0	0	0	0
3rd PPS/C12H34P19	3rd PPS	Europe	C12	H34	Male	48	16.399999618530273	Ceftriaxone	1310	mg	1	1310	79.87805063847915	Upper Respiratory Infections (URTI)	HAI	Empirical: awaiting culture	Invasive Ventilation	1	1	2	0	0	0	0	0	0	0	0	0	0	1	0	1	0	0
3rd PPS/C12H34P20	3rd PPS	Europe	C12	H34	Male	4	8.460000038146973	Ceftriaxone	63	mg	1	63	7.446808477059905	Central Nervous System (CNS) infections	CAI	Empirical: pathogen determined	No Ventilation	1	1	0	0	0	0	0	0	0	0	0	0	0	0	0	0	0	0
3rd PPS/C12H34P21	3rd PPS	Europe	C12	H34	Male	120	23.149999618530273	Ceftriaxone	1850	mg	1	1850	79.91360822827743	Bacterial LRTI	HAI	Empirical: pathogen determined	No Ventilation	2	2	2	0	0	1	0	0	0	0	0	1	0	0	0	0	0	0
3rd PPS/C12H34P22	3rd PPS	Europe	C12	H34	Male	4	5	Gentamicin	23	mg	1	23	4.6	CRBSI	HAI	Empirical: pathogen determined	Non-Invasive Ventilation	2	2	3	0	0	1	0	0	0	0	0	0	0	0	0	1	0	1
3rd PPS/C12H34P23	3rd PPS	Europe	C12	H34	Male	84	21	Pip-taz	1900	mg	4	7600	361.9047619047619	Sepsis	HAI	Empirical: pathogen determined	Non-Invasive Ventilation	3	3	3	0	0	0	0	2	0	0	0	0	0	1	0	0	0	1
3rd PPS/C12H34P24	3rd PPS	Europe	C12	H34	Male	84	21	Gentamicin	168	mg	1	168	8	Sepsis	HAI	Empirical: pathogen determined	Non-Invasive Ventilation	3	3	3	0	0	0	0	2	0	0	0	0	0	1	0	0	0	1
3rd PPS/C12H34P25	3rd PPS	Europe	C12	H34	Female	7	3.2699999809265137	Gentamicin	28	mg	1	28	8.562691181443538	Bacterial LRTI	HAI	Empirical: pathogen determined	Invasive Ventilation	2	2	3	0	0	0	0	1	0	0	0	0	0	0	0	1	0	1
3rd PPS/C12H34P26	3rd PPS	Europe	C12	H34	Female	7	3.2699999809265137	Co-amoxiclav	100	mg	3	300	91.74311980118078	Bacterial LRTI	HAI	Empirical: pathogen determined	Invasive Ventilation	2	2	3	0	0	0	0	1	0	0	0	0	0	0	0	1	0	1
3rd PPS/C12H27P16	3rd PPS	Europe	C12	H27	Female	60	20	Ceftriaxone	1600	mg	1	1600	80	Skin/Soft Tissue Infections (SSTI)	CAI	Targeted	No Ventilation	2	1	1	0	0	0	0	0	1	0	0	0	0	0	0	0	0	0
3rd PPS/C12H27P17	3rd PPS	Europe	C12	H27	Male	72	23.299999237060547	Cefuroxime	470	mg	3	1410	60.51502344074244	Other	CAI	Empirical: awaiting culture	No Ventilation	2	2	1	0	0	0	0	0	1	0	0	0	0	0	0	0	0	0
3rd PPS/C12H27P18	3rd PPS	Europe	C12	H27	Male	96	47	Ceftriaxone	3760	mg	1	3760	80	Sepsis	HAI	Empirical: pathogen determined	No Ventilation	2	2	1	0	0	1	0	0	0	0	0	0	0	0	0	0	0	0
3rd PPS/C12H27P19	3rd PPS	Europe	C12	H27	Male	96	47	Teicoplanin	400	mg	1	400	8.51063829787234	Sepsis	HAI	Empirical: pathogen determined	No Ventilation	2	2	1	0	0	1	0	0	0	0	0	0	0	0	0	0	0	0
3rd PPS/C12H27P20	3rd PPS	Europe	C12	H27	Male	72	20.360000610351563	Vancomycin	400	mg	3	1200	58.939094500315896	Skin/Soft Tissue Infections (SSTI)	CAI	Targeted	No Ventilation	2	1	1	0	0	0	0	0	0	0	0	1	0	0	0	0	0	0
3rd PPS/C12H27P21	3rd PPS	Europe	C12	H27	Male	36	16	Meropenem	640	mg	3	1920	120	Sepsis	CAI	Empirical: awaiting culture	No Ventilation	2	2	0	0	0	0	0	0	0	0	0	0	0	0	0	0	0	0
3rd PPS/C12H27P22	3rd PPS	Europe	C12	H27	Male	36	16	Vancomycin	420	mg	3	1260	78.75	Sepsis	CAI	Targeted	No Ventilation	2	2	0	0	0	0	0	0	0	0	0	0	0	0	0	0	0	0
3rd PPS/C12H27P23	3rd PPS	Europe	C12	H27	Female	36	14.15999984741211	Pip-taz	1300	mg	4	5200	367.2316423753603	Sepsis	HAI	Empirical: pathogen determined	No Ventilation	4	2	2	0	0	0	0	0	1	0	0	0	0	0	1	0	0	0
3rd PPS/C12H25P4	3rd PPS	Europe	C12	H25	Female	24	17.950000762939453	Co-amoxiclav	540	mg	3	1620	90.25069254285158	Skin/Soft Tissue Infections (SSTI)	CAI	Empirical: pathogen determined	No Ventilation	1	1	0	0	0	0	0	0	0	0	0	0	0	0	0	0	0	0
3rd PPS/C12H25P5	3rd PPS	Europe	C12	H25	Female	6	6.599999904632568	Ceftriaxone	530	mg	1	530	80.30303146337786	Central Nervous System (CNS) infections	CAI	Empirical: pathogen determined	No Ventilation	1	1	0	0	0	0	0	0	0	0	0	0	0	0	0	0	0	0
3rd PPS/C12H31P17	3rd PPS	Europe	C12	H31	Male	96	21.100000381469727	Meropenem	850	mg	3	2550	120.85307838380139	Viral LRTI	CAI	Empirical: awaiting culture	No Ventilation	2	2	1	0	0	0	0	0	0	0	0	0	0	0	0	0	0	1
3rd PPS/C12H31P18	3rd PPS	Europe	C12	H31	Male	24	16.5	Pip-taz	1800	mg	4	7200	436.3636363636364	Treatment for Surgical disease	CAI	Targeted	No Ventilation	1	1	0	0	0	0	0	0	0	0	0	0	0	0	0	0	0	0
3rd PPS/C12H31P19	3rd PPS	Europe	C12	H31	Male	96	21.899999618530273	Co-amoxiclav	650	mg	3	1950	89.04109744139193	Skin/Soft Tissue Infections (SSTI)	CAI	Empirical: awaiting culture	No Ventilation	1	1	0	0	0	0	0	0	0	0	0	0	0	0	0	0	0	0
3rd PPS/C12H31P20	3rd PPS	Europe	C12	H31	Female	84	20.299999237060547	Ceftriaxone	1000	mg	1	1000	49.26108559523279	Bacterial LRTI	CAI	Empirical: awaiting culture	No Ventilation	1	1	0	0	0	0	0	0	0	0	0	0	0	0	0	0	0	0
3rd PPS/C12H31P21	3rd PPS	Europe	C12	H31	Male	1	3.190000057220459	Cefotaxime	135	mg	4	540	169.2789938287706	Joint/Bone Infections	CAI	Empirical: awaiting culture	No Ventilation	1	1	2	0	0	0	0	0	0	0	0	0	0	1	0	1	0	0
3rd PPS/C12H31P22	3rd PPS	Europe	C12	H31	Female	24	14.399999618530273	Ceftriaxone	1150	mg	1	1150	79.86111322670813	Central Nervous System (CNS) infections	CAI	Empirical: awaiting culture	No Ventilation	1	1	0	0	0	0	0	0	0	0	0	0	0	0	0	0	0	0
3rd PPS/C12H31P23	3rd PPS	Europe	C12	H31	Male	60	17.149999618530273	Ceftriaxone	1360	mg	1	1360	79.30029330907645	Sepsis	CAI	Empirical: awaiting culture	No Ventilation	1	1	0	0	0	0	0	0	0	0	0	0	0	0	0	0	0	0
3rd PPS/C12H31P24	3rd PPS	Europe	C12	H31	Female	72	18.25	Co-amoxiclav	550	mg	3	1650	90.41095890410959	Upper Respiratory Infections (URTI)	HAI	Empirical: no culture	No Ventilation	1	1	0	0	0	0	0	0	0	0	0	0	0	0	0	0	0	0
3rd PPS/C12H24P19	3rd PPS	Europe	C12	H24	Male	108	45	Cefuroxime	1500	mg	3	4500	100	Other	CAI	Empirical: awaiting culture	Invasive Ventilation	1	1	1	0	0	0	0	0	0	0	0	0	1	0	0	0	0	0
3rd PPS/C12H24P20	3rd PPS	Europe	C12	H24	Female	96	21.299999237060547	Ceftriaxone	1700	mg	1	1700	79.81220943154382	Urinary Tract Infections (UTI)	CAI	Empirical: pathogen determined	No Ventilation	1	1	1	0	0	0	0	0	0	0	0	0	0	0	0	0	1	0
3rd PPS/C12H24P21	3rd PPS	Europe	C12	H24	Female	132	42.5	Ceftriaxone	3400	mg	1	3400	80	Sepsis	CAI	Empirical: awaiting culture	No Ventilation	1	1	0	0	0	0	0	0	0	0	0	0	0	0	0	0	0	0
3rd PPS/C12H24P22	3rd PPS	Europe	C12	H24	Male	36	14.5	Ceftriaxone	1150	mg	1	1150	79.3103448275862	Upper Respiratory Infections (URTI)	CAI	Empirical: awaiting culture	No Ventilation	1	1	0	0	0	0	0	0	0	0	0	0	0	0	0	0	0	0
3rd PPS/C12H24P23	3rd PPS	Europe	C12	H24	Female	120	44.5	Ceftriaxone	3500	mg	1	3500	78.65168539325843	Skin/Soft Tissue Infections (SSTI)	CAI	Empirical: awaiting culture	No Ventilation	1	1	0	0	0	0	0	0	0	0	0	0	0	0	0	0	0	0
3rd PPS/C12H24P24	3rd PPS	Europe	C12	H24	Male	132	51	Ceftriaxone	4000	mg	1	4000	78.43137254901961	Sepsis	CAI	Targeted	No Ventilation	1	1	0	0	0	0	0	0	0	0	0	0	0	0	0	0	0	0
3rd PPS/C12H24P25	3rd PPS	Europe	C12	H24	Male	20	9.949999809265137	Meropenem	200	mg	3	600	60.30150869362814	Febrile neutropenia/Fever	HAI	Empirical: awaiting culture	No Ventilation	2	1	3	0	0	1	0	0	0	1	0	0	0	1	0	0	0	0
3rd PPS/C12H24P26	3rd PPS	Europe	C12	H24	Female	108	33.900001525878906	Meropenem	680	mg	3	2040	60.17698844180539	Febrile neutropenia/Fever	CAI	Empirical: awaiting culture	No Ventilation	4	3	3	0	0	0	0	0	0	1	0	0	0	0	1	0	0	1
3rd PPS/C12H24P27	3rd PPS	Europe	C12	H24	Male	36	14.399999618530273	Meropenem	290	mg	3	870	60.4166682671618	Febrile neutropenia/Fever	Unknown	Empirical: awaiting culture	No Ventilation	1	1	1	0	0	0	0	0	0	1	0	0	0	0	0	0	0	0
3rd PPS/C12H24P28	3rd PPS	Europe	C12	H24	Female	19	9.800000190734863	Meropenem	200	mg	3	600	61.22448860432199	Febrile neutropenia/Fever	HAI	Empirical: awaiting culture	No Ventilation	2	1	1	0	0	0	0	0	0	1	0	0	0	0	0	0	0	0
3rd PPS/C12H24P29	3rd PPS	Europe	C12	H24	Female	16	9.5	Meropenem	190	mg	3	570	60	Febrile neutropenia/Fever	HAI	Empirical: awaiting culture	No Ventilation	3	1	3	0	0	0	0	0	0	1	0	0	0	0	1	0	1	0
3rd PPS/C12H24P30	3rd PPS	Europe	C12	H24	Male	12	9.75	Gentamicin	70	mg	1	70	7.17948717948718	Febrile neutropenia/Fever	HAI	Empirical: awaiting culture	No Ventilation	6	4	1	0	0	0	0	0	0	1	0	0	0	0	0	0	0	0
3rd PPS/C12H24P31	3rd PPS	Europe	C12	H24	Male	12	9.75	Pip-taz	900	mg	4	3600	369.2307692307692	Febrile neutropenia/Fever	HAI	Empirical: awaiting culture	No Ventilation	6	4	1	0	0	0	0	0	0	1	0	0	0	0	0	0	0	0
3rd PPS/C12H24P32	3rd PPS	Europe	C12	H24	Male	84	20.799999237060547	Pip-taz	1800	mg	4	7200	346.153858850694	Febrile neutropenia/Fever	HAI	Empirical: awaiting culture	No Ventilation	2	1	3	1	0	0	0	0	0	1	0	0	0	0	0	0	1	1
3rd PPS/C12H24P33	3rd PPS	Europe	C12	H24	Male	3	4.699999809265137	Ceftriaxone	360	mg	1	360	76.59574778925095	Central Nervous System (CNS) infections	CAI	Empirical: awaiting culture	No Ventilation	2	1	1	0	0	0	0	0	0	0	0	0	0	0	1	0	0	0
3rd PPS/C12H24P34	3rd PPS	Europe	C12	H24	Female	60	18	Metronidazole	135	mg	3	405	22.5	Sepsis	Unknown	Empirical: awaiting culture	Invasive Ventilation	2	2	2	0	0	0	0	0	0	0	0	1	2	0	0	0	0	0
3rd PPS/C12H24P35	3rd PPS	Europe	C12	H24	Female	60	18	Meropenem	360	mg	3	1080	60	Sepsis	Unknown	Empirical: awaiting culture	Invasive Ventilation	2	2	2	0	0	0	0	0	0	0	0	1	2	0	0	0	0	0
4th PPS/C12H28P9	4th PPS	Europe	C12	H28	Female	72	16.799999237060547	Ceftazidime	840	mg	3	2520	150.0000068119597	Bacterial LRTI	CAI	Empirical: awaiting culture	No Ventilation	3	3	1	0	0	0	0	0	0	0	0	0	0	0	0	0	0	1
4th PPS/C12H28P10	4th PPS	Europe	C12	H28	Female	72	16.799999237060547	Teicoplanin	170	mg	1	170	10.119048078584584	Bacterial LRTI	CAI	Empirical: awaiting culture	No Ventilation	3	3	1	0	0	0	0	0	0	0	0	0	0	0	0	0	0	1
4th PPS/C12H28P11	4th PPS	Europe	C12	H28	Male	60	14.600000381469727	Gentamicin	75	mg	1	75	5.136986167150362	Treatment for Surgical disease	CAI	Empirical: awaiting culture	No Ventilation	3	3	0	0	0	0	0	0	0	0	0	0	0	0	0	0	0	0
4th PPS/C12H28P12	4th PPS	Europe	C12	H28	Male	60	14.600000381469727	Metronidazole	110	mg	3	330	22.602739135461594	Treatment for Surgical disease	CAI	Empirical: awaiting culture	No Ventilation	3	3	0	0	0	0	0	0	0	0	0	0	0	0	0	0	0	0
4th PPS/C12H28P13	4th PPS	Europe	C12	H28	Male	108	29.299999237060547	Pip-taz	2600	mg	3	7800	266.2116110274178	Other	CAI	Empirical: awaiting culture	No Ventilation	1	1	0	0	0	0	0	0	0	0	0	0	0	0	0	0	0	0
4th PPS/C12H28P14	4th PPS	Europe	C12	H28	Male	3	5.599999904632568	Ceftriaxone	450	mg	1	450	80.35714422561686	Sepsis	CAI	Empirical: awaiting culture	No Ventilation	1	1	0	0	0	0	0	0	0	0	0	0	0	0	0	0	0	0
4th PPS/C12H28P15	4th PPS	Europe	C12	H28	Female	2	3.4200000762939453	Cefotaxime	179	mg	4	716	209.35672047583327	Sepsis	CAI	Empirical: awaiting culture	No Ventilation	1	1	1	0	0	0	0	0	0	0	0	0	0	0	0	1	0	0
4th PPS/C12H28P16	4th PPS	Europe	C12	H28	Female	132	31.299999237060547	Ceftazidime	1560	mg	3	4680	149.52077041774106	Bacterial LRTI	CAI	Empirical: awaiting culture	No Ventilation	3	3	1	0	0	0	0	0	0	0	0	0	0	0	0	0	0	1
4th PPS/C12H33P38	4th PPS	Europe	C12	H33	Female	2	4.599999904632568	Cefotaxime	230	mg	4	920	200.00000414641016	Sepsis	CAI	Empirical: pathogen determined	No Ventilation	2	2	0	0	0	0	0	0	0	0	0	0	0	0	0	0	0	0
4th PPS/C12H33P39	4th PPS	Europe	C12	H33	Female	24	13.199999809265137	Co-amoxiclav	390	mg	3	1170	88.63636491712462	Bacterial LRTI	CAI	Empirical: pathogen determined	No Ventilation	1	1	1	0	0	0	0	0	0	0	0	0	0	0	0	0	0	1
4th PPS/C12H33P40	4th PPS	Europe	C12	H33	Male	11	9.880000114440918	Co-amoxiclav	300	mg	3	900	91.09311635376721	Bacterial LRTI	CAI	Empirical: awaiting culture	No Ventilation	1	1	0	0	0	0	0	0	0	0	0	0	0	0	0	0	0	0
4th PPS/C12H33P41	4th PPS	Europe	C12	H33	Male	3	4.179999828338623	Meropenem	165	mg	3	495	118.42105749481382	Sepsis	CAI	Empirical: pathogen determined	Invasive Ventilation	1	1	3	0	0	1	0	1	0	0	0	0	0	1	0	0	0	0
4th PPS/C12H33P42	4th PPS	Europe	C12	H33	Male	13	6.5	Vancomycin	100	mg	3	300	46.15384615384615	Sepsis	HAI	Empirical: pathogen determined	Invasive Ventilation	2	2	3	0	0	1	0	1	0	0	0	0	0	1	0	0	0	0
4th PPS/C12H33P43	4th PPS	Europe	C12	H33	Male	13	6.5	Meropenem	130	mg	3	390	60	Sepsis	HAI	Empirical: pathogen determined	Invasive Ventilation	2	2	3	0	0	1	0	1	0	0	0	0	0	1	0	0	0	0
4th PPS/C12H33P44	4th PPS	Europe	C12	H33	Female	48	20	Meropenem	800	mg	3	2400	120	Treatment for Surgical disease	HAI	Targeted	Non-Invasive Ventilation	3	2	2	0	0	0	0	0	0	0	0	1	1	0	0	0	0	0
4th PPS/C12H33P45	4th PPS	Europe	C12	H33	Female	48	20	Vancomycin	300	mg	3	900	45	CRBSI	HAI	Empirical: pathogen determined	Non-Invasive Ventilation	3	2	2	0	0	0	0	0	0	0	0	1	1	0	0	0	0	0
4th PPS/C12H33P46	4th PPS	Europe	C12	H33	Female	72	17.450000762939453	Gentamicin	130	mg	1	130	7.4498564078057665	CRBSI	HAI	Empirical: pathogen determined	Invasive Ventilation	3	2	1	0	0	0	0	0	0	1	0	0	0	0	0	0	0	0
4th PPS/C12H33P47	4th PPS	Europe	C12	H33	Female	72	17.450000762939453	Meropenem	700	mg	3	2100	120.3438342799393	CRBSI	HAI	Empirical: pathogen determined	Invasive Ventilation	3	2	1	0	0	0	0	0	0	1	0	0	0	0	0	0	0	0
4th PPS/C12H33P48	4th PPS	Europe	C12	H33	Female	96	32.95000076293945	Pip-taz	2800	mg	4	11200	339.9089450886208	Upper Respiratory Infections (URTI)	CAI	Empirical: awaiting culture	No Ventilation	1	1	1	0	0	0	0	0	0	0	0	0	0	0	1	0	0	0
4th PPS/C12H33P49	4th PPS	Europe	C12	H33	Male	1	4.539999961853027	Cefotaxime	225	mg	4	900	198.23788712823244	Central Nervous System (CNS) infections	CAI	Empirical: pathogen determined	Invasive Ventilation	3	2	1	0	0	0	0	1	0	0	0	0	0	0	0	0	0	0
4th PPS/C12H33P50	4th PPS	Europe	C12	H33	Male	15	10.640000343322754	Meropenem	420	mg	3	1260	118.4210488104661	Bacterial LRTI	CAI	Empirical: no culture	No Ventilation	1	1	0	0	0	0	0	0	0	0	0	0	0	0	0	0	0	0
4th PPS/C12H33P51	4th PPS	Europe	C12	H33	Male	108	33.599998474121094	Meropenem	1400	mg	3	4200	125.0000056766331	Febrile neutropenia/Fever	Unknown	Empirical: pathogen determined	No Ventilation	3	2	1	0	0	0	0	0	0	1	0	0	0	0	0	0	0	0
4th PPS/C12H33P52	4th PPS	Europe	C12	H33	Male	108	30.450000762939453	Pip-taz	2740	mg	4	10960	359.9343095366803	Febrile neutropenia/Fever	Unknown	Empirical: pathogen determined	No Ventilation	2	2	1	0	0	0	0	0	0	1	0	0	0	0	0	0	0	0
4th PPS/C12H33P53	4th PPS	Europe	C12	H33	Male	36	15.800000190734863	Pip-taz	1400	mg	3	4200	265.82278160116	Febrile neutropenia/Fever	Unknown	Empirical: pathogen determined	No Ventilation	2	2	1	0	0	0	0	0	0	1	0	0	0	0	0	0	0	0
4th PPS/C12H33P54	4th PPS	Europe	C12	H33	Male	24	12.149999618530273	Co-amoxiclav	375	mg	3	1125	92.59259549969318	Treatment for Surgical disease	Unknown	Empirical: pathogen determined	No Ventilation	1	1	2	0	0	1	0	0	0	0	0	0	0	1	0	0	0	0
4th PPS/C12H33P55	4th PPS	Europe	C12	H33	Male	132	32	Ceftriaxone	2500	mg	1	2500	78.125	Sepsis	CAI	Empirical: pathogen determined	No Ventilation	1	1	1	0	0	0	0	0	0	0	0	0	1	0	0	0	0	0
4th PPS/C12H33P56	4th PPS	Europe	C12	H33	Female	12	3.049999952316284	Cefotaxime	150	mg	4	600	196.7213145509519	Sepsis	CAI	Empirical: pathogen determined	No Ventilation	2	2	2	0	0	0	0	0	0	0	0	0	1	0	0	1	0	0
4th PPS/C12H33P57	4th PPS	Europe	C12	H33	Female	36	15	Co-amoxiclav	450	mg	3	1350	90	Treatment for Surgical disease	CAI	Empirical: awaiting culture	No Ventilation	1	1	0	0	0	0	0	0	0	0	0	0	0	0	0	0	0	0
4th PPS/C12H33P58	4th PPS	Europe	C12	H33	Male	4	6.199999809265137	Ceftriaxone	310	mg	1	310	50.00000153818443	Urinary Tract Infections (UTI)	CAI	Empirical: no culture	No Ventilation	1	1	0	0	0	0	0	0	0	0	0	0	0	0	0	0	0	0
4th PPS/C12H33P59	4th PPS	Europe	C12	H33	Male	24	14.600000381469727	Co-amoxiclav	420	mg	3	1260	86.30136760812609	Acute Otitis Media (AOM)	CAI	Empirical: awaiting culture	No Ventilation	1	1	0	0	0	0	0	0	0	0	0	0	0	0	0	0	0	0
4th PPS/C12H33P60	4th PPS	Europe	C12	H33	Female	60	21	Ceftriaxone	1600	mg	1	1600	76.19047619047619	Bacterial LRTI	CAI	Empirical: pathogen determined	No Ventilation	2	2	0	0	0	0	0	0	0	0	0	0	0	0	0	0	0	0
4th PPS/C12H33P61	4th PPS	Europe	C12	H33	Female	60	21	Clindamycin	80	mg	4	320	15.238095238095237	Bacterial LRTI	CAI	Empirical: pathogen determined	No Ventilation	2	2	0	0	0	0	0	0	0	0	0	0	0	0	0	0	0	0
4th PPS/C12H23P6	4th PPS	Europe	C12	H23	Female	72	28.5	Co-amoxiclav	850	mg	3	2550	89.47368421052632	Treatment for Surgical disease	CAI	Empirical: pathogen determined	No Ventilation	1	1	1	0	0	0	0	1	0	0	0	0	0	0	0	0	0	0
4th PPS/C12H23P7	4th PPS	Europe	C12	H23	Female	108	22.399999618530273	Cefuroxime	450	mg	3	1350	60.26785816921265	Urinary Tract Infections (UTI)	CAI	Empirical: pathogen determined	No Ventilation	2	2	1	0	0	0	0	0	0	0	0	0	0	0	0	0	1	0
4th PPS/C12H23P8	4th PPS	Europe	C12	H23	Female	108	22.399999618530273	Gentamicin	157	mg	1	157	7.008928690789916	Urinary Tract Infections (UTI)	CAI	Empirical: pathogen determined	No Ventilation	2	2	1	0	0	0	0	0	0	0	0	0	0	0	0	0	1	0
4th PPS/C12H23P9	4th PPS	Europe	C12	H23	Male	15	10.5	Ceftriaxone	840	mg	1	840	80	Sepsis	CAI	Empirical: pathogen determined	No Ventilation	1	1	0	0	0	0	0	0	0	0	0	0	0	0	0	0	0	0
4th PPS/C12H23P10	4th PPS	Europe	C12	H23	Female	36	13.199999809265137	Cefuroxime	650	mg	3	1950	147.72727486187435	Bacterial LRTI	CAI	Targeted	No Ventilation	2	2	1	0	0	0	0	0	0	0	0	0	0	0	0	0	0	1
4th PPS/C12H26P66	4th PPS	Europe	C12	H26	Female	24	13.199999809265137	Pip-taz	1200	mg	4	4800	363.63636889076764	Febrile neutropenia/Fever	CAI	Empirical: pathogen determined	No Ventilation	1	1	1	0	0	0	0	0	0	1	0	0	0	0	0	0	0	0
4th PPS/C12H26P67	4th PPS	Europe	C12	H26	Female	120	29	Pip-taz	2250	mg	4	9000	310.3448275862069	Sepsis	CAI	Empirical: pathogen determined	No Ventilation	1	1	3	0	0	0	1	0	0	0	0	0	1	1	0	0	0	0
4th PPS/C12H26P68	4th PPS	Europe	C12	H26	Female	1	3.5999999046325684	Cefotaxime	180	mg	4	720	200.00000529819079	Sepsis	CAI	Empirical: pathogen determined	No Ventilation	1	1	0	0	0	0	0	0	0	0	0	0	0	0	0	0	0	0
4th PPS/C12H26P69	4th PPS	Europe	C12	H26	Female	20	10.5	Pip-taz	990	mg	4	3960	377.14285714285717	Febrile neutropenia/Fever	HAI	Empirical: no culture	No Ventilation	2	1	1	0	0	0	0	0	0	1	0	0	0	0	0	0	0	0
4th PPS/C12H26P70	4th PPS	Europe	C12	H26	Female	24	14.899999618530273	Cefotaxime	745	mg	4	2980	200.00000512039915	Joint/Bone Infections	CAI	Empirical: awaiting culture	No Ventilation	2	2	0	0	0	0	0	0	0	0	0	0	0	0	0	0	0	0
4th PPS/C12H26P71	4th PPS	Europe	C12	H26	Female	24	14.899999618530273	Metronidazole	112	mg	3	336	22.550336147803392	Joint/Bone Infections	CAI	Empirical: awaiting culture	No Ventilation	2	2	0	0	0	0	0	0	0	0	0	0	0	0	0	0	0	0
4th PPS/C12H26P72	4th PPS	Europe	C12	H26	Female	4	6.900000095367432	Cefotaxime	345	mg	4	1380	199.99999723572665	Sepsis	CAI	Empirical: pathogen determined	No Ventilation	1	1	0	0	0	0	0	0	0	0	0	0	0	0	0	0	0	0
4th PPS/C12H26P73	4th PPS	Europe	C12	H26	Female	23	9.300000190734863	Clindamycin	58	mg	4	232	24.946236047514308	Central Nervous System (CNS) infections	CAI	Empirical: no culture	No Ventilation	2	2	1	0	0	0	0	0	0	0	0	0	1	0	0	0	0	0
4th PPS/C12H26P74	4th PPS	Europe	C12	H26	Female	23	9.300000190734863	Cefotaxime	465	mg	4	1860	199.99999589817506	Central Nervous System (CNS) infections	CAI	Empirical: no culture	No Ventilation	2	2	1	0	0	0	0	0	0	0	0	0	1	0	0	0	0	0
4th PPS/C12H26P75	4th PPS	Europe	C12	H26	Male	96	28.700000762939453	Ciprofloxacin	290	mg	3	870	30.31358804434034	Skin/Soft Tissue Infections (SSTI)	HAI	Targeted	No Ventilation	1	1	0	0	0	0	0	0	0	0	0	0	0	0	0	0	0	0
4th PPS/C12H26P76	4th PPS	Europe	C12	H26	Female	24	13.600000381469727	Clindamycin	110	mg	3	330	24.26470520174629	Bacterial LRTI	CAI	Empirical: pathogen determined	No Ventilation	2	2	0	0	0	0	0	0	0	0	0	0	0	0	0	0	0	0
4th PPS/C12H26P77	4th PPS	Europe	C12	H26	Female	24	13.600000381469727	Cefuroxime	680	mg	3	2040	149.99999579261342	Bacterial LRTI	CAI	Empirical: pathogen determined	No Ventilation	2	2	0	0	0	0	0	0	0	0	0	0	0	0	0	0	0	0
4th PPS/C12H26P78	4th PPS	Europe	C12	H26	Female	36	16.399999618530273	Metronidazole	123	mg	3	369	22.50000052335787	Treatment for Surgical disease	CAI	Empirical: pathogen determined	No Ventilation	2	2	0	0	0	0	0	0	0	0	0	0	0	0	0	0	0	0
4th PPS/C12H26P79	4th PPS	Europe	C12	H26	Female	36	16.399999618530273	Ciprofloxacin	164	mg	3	492	30.000000697810492	Treatment for Surgical disease	CAI	Targeted	No Ventilation	2	2	0	0	0	0	0	0	0	0	0	0	0	0	0	0	0	0
4th PPS/C12H26P80	4th PPS	Europe	C12	H26	Female	120	37.599998474121094	Metronidazole	282	mg	3	846	22.500000913092467	Other	CAI	Empirical: pathogen determined	No Ventilation	2	2	0	0	0	0	0	0	0	0	0	0	0	0	0	0	0	0
4th PPS/C12H26P81	4th PPS	Europe	C12	H26	Female	120	28.200000762939453	Pip-taz	3170	mg	3	9510	337.2340334294628	Treatment for Surgical disease	CAI	Empirical: awaiting culture	No Ventilation	1	1	0	0	0	0	0	0	0	0	0	0	0	0	0	0	0	0
4th PPS/C12H26P82	4th PPS	Europe	C12	H26	Male	120	41.79999923706055	Metronidazole	313.5	mg	3	940.5	22.50000041067316	Other	CAI	Empirical: awaiting culture	No Ventilation	2	2	0	0	0	0	0	0	0	0	0	0	0	0	0	0	0	0
4th PPS/C12H26P83	4th PPS	Europe	C12	H26	Male	120	41.79999923706055	Cefotaxime	2000	mg	4	8000	191.38756330184503	Other	CAI	Empirical: awaiting culture	No Ventilation	2	2	0	0	0	0	0	0	0	0	0	0	0	0	0	0	0	0
4th PPS/C12H26P84	4th PPS	Europe	C12	H26	Male	48	19.899999618530273	Pip-taz	2195	mg	3	6585	330.9045289562844	Treatment for Surgical disease	CAI	Empirical: pathogen determined	No Ventilation	1	1	0	0	0	0	0	0	0	0	0	0	0	0	0	0	0	0
4th PPS/C12H26P85	4th PPS	Europe	C12	H26	Male	120	36.70000076293945	Pip-taz	3300	mg	4	13200	359.67301704608354	Febrile neutropenia/Fever	Unknown	Empirical: pathogen determined	No Ventilation	2	2	1	0	0	0	0	0	0	1	0	0	0	0	0	0	0	0
4th PPS/C12H26P86	4th PPS	Europe	C12	H26	Female	10	10	Clindamycin	100	mg	4	400	40	Sepsis	CAI	Targeted	Invasive Ventilation	2	2	1	0	0	0	0	0	0	0	0	0	0	0	0	1	0	0
4th PPS/C12H26P87	4th PPS	Europe	C12	H26	Female	10	10	Cefotaxime	500	mg	4	2000	200	Sepsis	CAI	Targeted	Invasive Ventilation	2	2	1	0	0	0	0	0	0	0	0	0	0	0	0	1	0	0
4th PPS/C12H26P88	4th PPS	Europe	C12	H26	Female	24	10.899999618530273	Cefotaxime	545	mg	4	2180	200.00000699944476	Sepsis	CAI	Empirical: awaiting culture	No Ventilation	2	1	3	1	0	1	1	0	0	0	0	0	0	0	0	0	1	0
4th PPS/C12H26P89	4th PPS	Europe	C12	H26	Female	24	11.5	Cefotaxime	500	mg	3	1500	130.43478260869566	Sepsis	CAI	Empirical: awaiting culture	No Ventilation	1	1	1	1	0	0	0	0	0	0	0	0	0	0	0	0	1	0
4th PPS/C12H26P90	4th PPS	Europe	C12	H26	Female	24	10.100000381469727	Cefotaxime	500	mg	4	2000	198.019794501133	Sepsis	CAI	Empirical: pathogen determined	No Ventilation	1	1	1	0	0	0	0	0	0	0	0	0	1	0	0	0	0	0
4th PPS/C12H26P91	4th PPS	Europe	C12	H26	Female	19	9	Co-amoxiclav	270	mg	3	810	90	Viral LRTI	CAI	Empirical: pathogen determined	Invasive Ventilation	1	1	2	0	0	0	0	1	0	0	0	0	1	0	0	0	0	0
4th PPS/C12H32P61	4th PPS	Europe	C12	H32	Female	36	15	Cefotaxime	750	mg	1	750	50	Bacterial LRTI	CAI	Targeted	No Ventilation	1	1	0	0	0	0	0	0	0	0	0	0	0	0	0	0	0	0
4th PPS/C12H32P62	4th PPS	Europe	C12	H32	Male	24	10	Co-amoxiclav	321	mg	3	963	96.3	Bacterial LRTI	CAI	Targeted	Non-Invasive Ventilation	1	1	0	0	0	0	0	0	0	0	0	0	0	0	0	0	0	0
4th PPS/C12H32P63	4th PPS	Europe	C12	H32	Male	132	45	Metronidazole	240	mg	3	720	16	GI tract infections	CAI	Empirical: awaiting culture	No Ventilation	2	2	1	0	0	0	0	1	0	0	0	0	0	0	0	0	0	0
4th PPS/C12H32P64	4th PPS	Europe	C12	H32	Male	132	45	Ciprofloxacin	320	mg	3	960	21.333333333333332	GI tract infections	CAI	Empirical: awaiting culture	No Ventilation	2	2	1	0	0	0	0	1	0	0	0	0	0	0	0	0	0	0
4th PPS/C12H32P65	4th PPS	Europe	C12	H32	Male	72	17.600000381469727	Ceftriaxone	870	mg	1	870	49.4318171104124	Bacterial LRTI	CAI	Empirical: awaiting culture	No Ventilation	2	2	1	0	0	0	0	0	1	0	0	0	0	0	0	0	0	0
4th PPS/C12H32P66	4th PPS	Europe	C12	H32	Male	24	15	Ceftriaxone	190	mg	1	190	12.666666666666666	Central Nervous System (CNS) infections	CAI	Empirical: pathogen determined	No Ventilation	3	2	0	0	0	0	0	0	0	0	0	0	0	0	0	0	0	0
4th PPS/C12H32P67	4th PPS	Europe	C12	H32	Male	48	16	Ceftriaxone	1280	mg	1	1280	80	Central Nervous System (CNS) infections	CAI	Empirical: awaiting culture	No Ventilation	1	1	0	0	0	0	0	0	0	0	0	0	0	0	0	0	0	0
4th PPS/C12H32P68	4th PPS	Europe	C12	H32	Female	72	18	Co-amoxiclav	540	mg	3	1620	90	Bacterial LRTI	CAI	Empirical: awaiting culture	No Ventilation	2	2	1	0	0	0	0	0	0	0	0	0	0	0	0	0	0	1
4th PPS/C12H32P69	4th PPS	Europe	C12	H32	Male	48	20	Metronidazole	150	mg	3	450	22.5	GI tract infections	CAI	Empirical: awaiting culture	Invasive Ventilation	1	1	3	0	0	0	0	1	0	0	0	0	1	0	0	0	0	1
4th PPS/C12H32P70	4th PPS	Europe	C12	H32	Male	16	11	Meropenem	220	mg	3	660	60	Bacterial LRTI	CAI	Empirical: awaiting culture	Invasive Ventilation	2	2	0	0	0	0	0	0	0	0	0	0	0	0	0	0	0	0
4th PPS/C12H32P71	4th PPS	Europe	C12	H32	Male	2	5	Ceftriaxone	250	mg	1	250	50	Sepsis	CAI	Empirical: pathogen determined	No Ventilation	1	1	1	0	0	0	0	0	0	0	0	0	0	0	0	0	1	0
4th PPS/C12H32P72	4th PPS	Europe	C12	H32	Male	6	7.679999828338623	Co-amoxiclav	96	mg	2	192	25.00000055879356	Bacterial LRTI	CAI	Empirical: awaiting culture	No Ventilation	1	1	1	0	0	0	0	0	0	0	0	0	0	0	0	0	0	1
4th PPS/C12H32P73	4th PPS	Europe	C12	H32	Female	36	14	Meropenem	408	mg	3	1224	87.42857142857143	Central Nervous System (CNS) infections	HAI	Targeted	No Ventilation	3	2	1	0	0	0	0	0	0	1	0	0	0	0	0	0	0	0
4th PPS/C12H32P74	4th PPS	Europe	C12	H32	Female	36	14	Vancomycin	340	mg	4	1360	97.14285714285714	Central Nervous System (CNS) infections	HAI	Targeted	No Ventilation	3	2	1	0	0	0	0	0	0	1	0	0	0	0	0	0	0	0
4th PPS/C12H32P75	4th PPS	Europe	C12	H32	Female	13	10	Co-amoxiclav	300	mg	3	900	90	Skin/Soft Tissue Infections (SSTI)	CAI	Empirical: awaiting culture	No Ventilation	1	1	0	0	0	0	0	0	0	0	0	0	0	0	0	0	0	0
4th PPS/C12H32P76	4th PPS	Europe	C12	H32	Female	2	4.820000171661377	Ceftriaxone	241	mg	1	241	49.999998219280386	Sepsis	CAI	Targeted	No Ventilation	1	1	0	0	0	0	0	0	0	0	0	0	0	0	0	0	0	0
4th PPS/C12H32P77	4th PPS	Europe	C12	H32	Male	22	11.380000114440918	Co-amoxiclav	340	mg	3	1020	89.63093055734218	Upper Respiratory Infections (URTI)	CAI	Empirical: pathogen determined	No Ventilation	2	1	1	0	0	0	0	0	0	0	0	0	0	1	0	0	0	0
4th PPS/C12H32P78	4th PPS	Europe	C12	H32	Male	36	18	Gentamicin	128	mg	1	128	7.111111111111111	Febrile neutropenia/Fever	CAI	Empirical: awaiting culture	No Ventilation	2	2	1	0	0	0	0	0	0	1	0	0	0	0	0	0	0	0
4th PPS/C12H32P79	4th PPS	Europe	C12	H32	Male	36	18	Pip-taz	1650	mg	4	6600	366.6666666666667	Febrile neutropenia/Fever	CAI	Empirical: awaiting culture	No Ventilation	2	2	1	0	0	0	0	0	0	1	0	0	0	0	0	0	0	0
4th PPS/C12H29P171	4th PPS	Europe	C12	H29	Female	72	18.299999237060547	Meropenem	350	mg	3	1050	57.37705157241619	Febrile neutropenia/Fever	HAI	Empirical: pathogen determined	No Ventilation	3	2	1	0	0	0	0	0	0	1	0	0	0	0	0	0	0	0
4th PPS/C12H29P172	4th PPS	Europe	C12	H29	Female	21	13.699999809265137	Pip-taz	1080	mg	4	4320	315.32847154336736	GI tract infections	HAI	Empirical: awaiting culture	No Ventilation	3	3	2	0	0	0	0	1	0	0	0	0	1	0	0	0	0	0
4th PPS/C12H29P173	4th PPS	Europe	C12	H29	Female	24	14.399999618530273	Ceftazidime	720	mg	3	2160	150.0000039736431	Treatment for Surgical disease	CAI	Targeted	No Ventilation	2	2	2	0	0	0	0	0	0	0	0	1	0	0	1	0	0	0
4th PPS/C12H29P174	4th PPS	Europe	C12	H29	Male	18	8.100000381469727	Clindamycin	30	mg	4	120	14.81481411711073	Treatment for Surgical disease	HAI	Targeted	No Ventilation	3	2	1	0	0	0	0	0	0	0	0	0	0	1	0	0	0	0
4th PPS/C12H29P175	4th PPS	Europe	C12	H29	Male	18	8.100000381469727	Cefotaxime	400	mg	3	1200	148.14814117110728	Treatment for Surgical disease	HAI	Targeted	No Ventilation	3	2	1	0	0	0	0	0	0	0	0	0	0	1	0	0	0	0
4th PPS/C12H29P176	4th PPS	Europe	C12	H29	Male	1	2.4000000953674316	Ampicillin	122	mg	4	488	203.33332525359293	Treatment for Surgical disease	HAI	Empirical: awaiting culture	Invasive Ventilation	6	5	2	0	0	1	0	0	0	0	0	1	0	0	0	0	0	0
4th PPS/C12H29P177	4th PPS	Europe	C12	H29	Male	1	2.4000000953674316	Vancomycin	24.299999237060547	mg	2	48.599998474121094	20.249998559554474	CRBSI	HAI	Empirical: awaiting culture	Invasive Ventilation	6	5	2	0	0	1	0	0	0	0	0	1	0	0	0	0	0	0
4th PPS/C12H29P178	4th PPS	Europe	C12	H29	Male	1	2.4000000953674316	Metronidazole	18.200000762939453	mg	3	54.60000228881836	22.750000049670536	Treatment for Surgical disease	HAI	Targeted	Invasive Ventilation	6	5	2	0	0	1	0	0	0	0	0	1	0	0	0	0	0	0
4th PPS/C12H29P179	4th PPS	Europe	C12	H29	Male	1	2.4000000953674316	Amikacin	30	mg	1	30	12.499999503294646	CRBSI	HAI	Targeted	Invasive Ventilation	6	5	2	0	0	1	0	0	0	0	0	1	0	0	0	0	0	0
4th PPS/C12H29P180	4th PPS	Europe	C12	H29	Female	60	18.600000381469727	Pip-taz	1890	mg	4	7560	406.451604567259	Pyrexia of Unknown Origin (PUO)	HAI	Empirical: pathogen determined	No Ventilation	2	1	1	0	0	0	0	0	0	1	0	0	0	0	0	0	0	0
4th PPS/C12H29P181	4th PPS	Europe	C12	H29	Female	60	21.200000762939453	Pip-taz	1890	mg	4	7560	356.6037607515529	Treatment for Surgical disease	HAI	Empirical: pathogen determined	Invasive Ventilation	3	3	1	0	0	1	0	0	0	0	0	0	0	0	0	0	0	0
4th PPS/C12H29P182	4th PPS	Europe	C12	H29	Female	60	21.200000762939453	Vancomycin	318	mg	3	954	44.99999838055311	Treatment for Surgical disease	HAI	Empirical: awaiting culture	Invasive Ventilation	3	3	1	0	0	1	0	0	0	0	0	0	0	0	0	0	0	0
4th PPS/C12H29P183	4th PPS	Europe	C12	H29	Female	60	21.200000762939453	Amikacin	424	mg	1	424	19.999999280245824	Treatment for Surgical disease	HAI	Empirical: pathogen determined	Invasive Ventilation	3	3	1	0	0	1	0	0	0	0	0	0	0	0	0	0	0	0
4th PPS/C12H29P184	4th PPS	Europe	C12	H29	Female	3	3.5999999046325684	Amikacin	35	mg	1	35	9.722222479773164	Bacterial LRTI	HAI	Empirical: awaiting culture	Invasive Ventilation	6	3	1	0	0	1	0	0	0	0	0	0	0	0	0	0	0	0
4th PPS/C12H29P185	4th PPS	Europe	C12	H29	Female	3	3.5999999046325684	Vancomycin	35	mg	1	35	9.722222479773164	CRBSI	HAI	Empirical: pathogen determined	Invasive Ventilation	6	3	1	0	0	1	0	0	0	0	0	0	0	0	0	0	0	0
4th PPS/C12H29P186	4th PPS	Europe	C12	H29	Female	3	3.5999999046325684	Pip-taz	325	mg	2	650	180.55556033864445	Bacterial LRTI	HAI	Empirical: awaiting culture	Invasive Ventilation	6	3	1	0	0	1	0	0	0	0	0	0	0	0	0	0	0	0
4th PPS/C12H29P187	4th PPS	Europe	C12	H29	Male	20	8.399999618530273	Vancomycin	126	mg	2	252	30.00000136239194	CRBSI	HAI	Empirical: pathogen determined	Invasive Ventilation	7	5	2	0	0	0	0	0	1	0	0	0	0	0	1	0	0	0
4th PPS/C12H29P188	4th PPS	Europe	C12	H29	Male	20	8.399999618530273	Meropenem	170	mg	3	510	60.7142884715075	Febrile neutropenia/Fever	HAI	Empirical: pathogen determined	Invasive Ventilation	7	5	2	0	0	0	0	0	1	0	0	0	0	0	1	0	0	0
4th PPS/C12H29P189	4th PPS	Europe	C12	H29	Male	20	8.399999618530273	Amikacin	165	mg	1	165	19.642858034899486	Febrile neutropenia/Fever	HAI	Empirical: pathogen determined	Invasive Ventilation	7	5	2	0	0	0	0	0	1	0	0	0	0	0	1	0	0	0
4th PPS/C12H29P190	4th PPS	Europe	C12	H29	Male	48	17	Pip-taz	1440	mg	4	5760	338.8235294117647	Sepsis	HAI	Empirical: pathogen determined	Invasive Ventilation	3	2	3	0	0	0	1	1	0	0	1	0	0	0	0	0	0	0
4th PPS/C12H29P191	4th PPS	Europe	C12	H29	Male	48	17	Amikacin	170	mg	1	170	10	Sepsis	HAI	Empirical: pathogen determined	Invasive Ventilation	3	2	3	0	0	0	1	1	0	0	1	0	0	0	0	0	0	0
4th PPS/C12H29P192	4th PPS	Europe	C12	H29	Female	132	42	Amikacin	840	mg	1	840	20	Treatment for Surgical disease	CAI	Targeted	Invasive Ventilation	3	2	2	0	0	0	0	0	0	0	0	0	2	0	0	0	0	0
4th PPS/C12H29P193	4th PPS	Europe	C12	H29	Female	132	42	Meropenem	1680	mg	3	5040	120	Treatment for Surgical disease	CAI	Targeted	Invasive Ventilation	3	2	2	0	0	0	0	0	0	0	0	0	2	0	0	0	0	0
4th PPS/C12H29P194	4th PPS	Europe	C12	H29	Female	8	8	Amikacin	159	mg	1	159	19.875	Sepsis	CAI	Empirical: pathogen determined	No Ventilation	3	3	2	0	0	1	0	0	0	0	0	0	1	0	0	0	0	0
4th PPS/C12H29P195	4th PPS	Europe	C12	H29	Female	8	8	Pip-taz	710	mg	4	2840	355	Sepsis	CAI	Empirical: pathogen determined	No Ventilation	3	3	2	0	0	1	0	0	0	0	0	0	1	0	0	0	0	0
4th PPS/C12H29P196	4th PPS	Europe	C12	H29	Female	8	8	Cefotaxime	390	mg	4	1560	195	Sepsis	CAI	Empirical: pathogen determined	No Ventilation	3	3	2	0	0	1	0	0	0	0	0	0	1	0	0	0	0	0
4th PPS/C12H29P197	4th PPS	Europe	C12	H29	Male	48	20.5	Pip-taz	1890	mg	4	7560	368.780487804878	Febrile neutropenia/Fever	HAI	Empirical: pathogen determined	No Ventilation	3	2	2	0	0	0	0	0	0	1	0	0	0	0	1	0	0	0
4th PPS/C12H29P198	4th PPS	Europe	C12	H29	Male	5	6.599999904632568	Meropenem	140	mg	3	420	63.63636455588434	Febrile neutropenia/Fever	Unknown	Empirical: awaiting culture	No Ventilation	5	5	2	0	0	0	0	0	1	0	0	0	0	0	1	0	0	0
4th PPS/C12H29P199	4th PPS	Europe	C12	H29	Male	5	6.599999904632568	Vancomycin	100	mg	3	300	45.454546111345955	Febrile neutropenia/Fever	Unknown	Empirical: awaiting culture	No Ventilation	5	5	2	0	0	0	0	0	1	0	0	0	0	0	1	0	0	0
4th PPS/C12H29P200	4th PPS	Europe	C12	H29	Male	5	6.599999904632568	Amikacin	130	mg	1	130	19.696969981583248	Febrile neutropenia/Fever	Unknown	Empirical: awaiting culture	No Ventilation	5	5	2	0	0	0	0	0	1	0	0	0	0	0	1	0	0	0
4th PPS/C12H29P201	4th PPS	Europe	C12	H29	Male	8	8.600000381469727	Amikacin	170	mg	1	170	19.767440983641826	CRBSI	CAI	Targeted	No Ventilation	3	2	1	0	0	1	0	0	0	0	0	0	0	0	0	0	0	0
4th PPS/C12H29P202	4th PPS	Europe	C12	H29	Male	36	17.399999618530273	Ciprofloxacin	175	mg	3	525	30.17241445458981	Febrile neutropenia/Fever	CAI	Targeted	No Ventilation	2	2	1	0	0	0	0	0	0	1	0	0	0	0	0	0	0	0
4th PPS/C12H29P203	4th PPS	Europe	C12	H29	Male	36	17.399999618530273	Ceftriaxone	1400	mg	1	1400	80.45977187890615	Sepsis	CAI	Targeted	No Ventilation	2	2	1	0	0	0	0	0	0	1	0	0	0	0	0	0	0	0
4th PPS/C12H29P204	4th PPS	Europe	C12	H29	Male	36	20.5	Meropenem	410	mg	3	1230	60	Febrile neutropenia/Fever	HAI	Empirical: pathogen determined	No Ventilation	4	2	1	0	0	0	0	0	0	1	0	0	0	0	0	0	0	0
4th PPS/C12H29P205	4th PPS	Europe	C12	H29	Male	36	20.5	Amikacin	410	mg	1	410	20	Febrile neutropenia/Fever	HAI	Empirical: pathogen determined	No Ventilation	4	2	1	0	0	0	0	0	0	1	0	0	0	0	0	0	0	0
4th PPS/C12H29P206	4th PPS	Europe	C12	H29	Male	5	8	Amikacin	150	mg	1	150	18.75	Febrile neutropenia/Fever	HAI	Empirical: pathogen determined	No Ventilation	4	2	1	0	0	0	0	0	0	1	0	0	0	0	0	0	0	0
4th PPS/C12H29P207	4th PPS	Europe	C12	H29	Male	5	8	Pip-taz	720	mg	4	2880	360	Febrile neutropenia/Fever	HAI	Empirical: pathogen determined	No Ventilation	4	2	1	0	0	0	0	0	0	1	0	0	0	0	0	0	0	0
4th PPS/C12H29P208	4th PPS	Europe	C12	H29	Male	9	4.800000190734863	Ciprofloxacin	100	mg	2	200	41.66666501098216	Bacterial LRTI	CAI	Empirical: awaiting culture	No Ventilation	3	3	1	0	0	0	0	0	1	0	0	0	0	0	0	0	0	0
4th PPS/C12H29P209	4th PPS	Europe	C12	H29	Male	84	20.100000381469727	Teicoplanin	200	mg	1	200	9.950248567377184	Febrile neutropenia/Fever	Unknown	Empirical: awaiting culture	No Ventilation	3	3	3	0	1	0	0	1	1	0	0	0	0	0	1	0	0	0
4th PPS/C12H29P210	4th PPS	Europe	C12	H29	Male	19	6.5	Pip-taz	570	mg	4	2280	350.7692307692308	Bacterial LRTI	Unknown	Empirical: awaiting culture	No Ventilation	2	2	3	0	0	0	0	0	1	0	0	0	0	0	2	0	0	0
4th PPS/C12H29P211	4th PPS	Europe	C12	H29	Male	19	6.5	Amikacin	100	mg	1	100	15.384615384615385	Viral LRTI	Unknown	Empirical: awaiting culture	No Ventilation	2	2	3	0	0	0	0	0	1	0	0	0	0	0	2	0	0	0
4th PPS/C12H29P212	4th PPS	Europe	C12	H29	Female	12	8.399999618530273	Ciprofloxacin	78	mg	3	234	27.85714412222109	CRBSI	HAI	Targeted	No Ventilation	6	5	1	0	0	0	0	0	0	1	0	0	0	0	0	0	0	0
4th PPS/C12H29P213	4th PPS	Europe	C12	H29	Female	36	16	Pip-taz	1440	mg	4	5760	360	Febrile neutropenia/Fever	Unknown	Empirical: awaiting culture	No Ventilation	1	1	1	0	0	0	0	0	0	1	0	0	0	0	0	0	0	0
4th PPS/C12H29P214	4th PPS	Europe	C12	H29	Female	21	15	Ciprofloxacin	150	mg	3	450	30	Febrile neutropenia/Fever	Unknown	Empirical: awaiting culture	No Ventilation	3	3	1	0	0	0	0	0	0	1	0	0	0	0	0	0	0	0
4th PPS/C12H29P215	4th PPS	Europe	C12	H29	Female	21	15	Pip-taz	1440	mg	4	5760	384	Febrile neutropenia/Fever	Unknown	Empirical: awaiting culture	No Ventilation	3	3	1	0	0	0	0	0	0	1	0	0	0	0	0	0	0	0
4th PPS/C12H29P216	4th PPS	Europe	C12	H29	Female	24	13.75	Pip-taz	1080	mg	4	4320	314.1818181818182	Skin/Soft Tissue Infections (SSTI)	HAI	Targeted	No Ventilation	1	1	2	0	0	0	0	0	0	1	0	0	1	0	0	0	0	0
4th PPS/C12H29P217	4th PPS	Europe	C12	H29	Male	60	7	Vancomycin	105	mg	3	315	45	Sepsis	HAI	Empirical: pathogen determined	No Ventilation	5	4	2	0	0	0	0	0	0	1	0	0	0	0	1	0	0	0
4th PPS/C12H29P218	4th PPS	Europe	C12	H29	Male	60	7	Meropenem	140	mg	3	420	60	Sepsis	HAI	Empirical: pathogen determined	No Ventilation	5	4	2	0	0	0	0	0	0	1	0	0	0	0	1	0	0	0
4th PPS/C12H29P219	4th PPS	Europe	C12	H29	Male	60	7	Ciprofloxacin	70	mg	3	210	30	Sepsis	HAI	Empirical: pathogen determined	No Ventilation	5	4	2	0	0	0	0	0	0	1	0	0	0	0	1	0	0	0
4th PPS/C12H29P220	4th PPS	Europe	C12	H29	Male	60	16	Pip-taz	1440	mg	4	5760	360	Sepsis	HAI	Empirical: awaiting culture	No Ventilation	5	3	2	0	0	0	0	1	1	0	0	0	0	0	0	0	0	0
4th PPS/C12H29P221	4th PPS	Europe	C12	H29	Female	22	13	Ceftriaxone	1000	mg	1	1000	76.92307692307692	Sepsis	CAI	Empirical: pathogen determined	No Ventilation	1	1	1	0	0	0	0	0	0	0	0	0	1	0	0	0	0	0
4th PPS/C12H29P222	4th PPS	Europe	C12	H29	Male	36	13	Meropenem	250	mg	3	750	57.69230769230769	Sepsis	HAI	Empirical: awaiting culture	No Ventilation	1	1	1	0	0	0	0	0	0	1	0	0	0	0	0	0	0	0
4th PPS/C12H29P223	4th PPS	Europe	C12	H29	Male	36	14.699999809265137	Pip-taz	1440	mg	4	5760	391.83673977802226	Febrile neutropenia/Fever	CAI	Empirical: awaiting culture	No Ventilation	3	3	1	0	0	0	0	0	0	1	0	0	0	0	0	0	0	0
4th PPS/C12H29P224	4th PPS	Europe	C12	H29	Male	36	14.699999809265137	Amikacin	300	mg	1	300	20.408163530105327	Febrile neutropenia/Fever	CAI	Empirical: awaiting culture	No Ventilation	3	3	1	0	0	0	0	0	0	1	0	0	0	0	0	0	0	0
4th PPS/C12H29P225	4th PPS	Europe	C12	H29	Female	48	15.899999618530273	Pip-taz	1440	mg	4	5760	362.2641596347679	Pyrexia of Unknown Origin (PUO)	CAI	Empirical: pathogen determined	No Ventilation	4	4	1	0	0	0	0	0	0	1	0	0	0	0	0	0	0	0
4th PPS/C12H29P226	4th PPS	Europe	C12	H29	Female	48	15.899999618530273	Ciprofloxacin	160	mg	3	480	30.188679969563992	Pyrexia of Unknown Origin (PUO)	CAI	Empirical: pathogen determined	No Ventilation	4	4	1	0	0	0	0	0	0	1	0	0	0	0	0	0	0	0
4th PPS/C12H29P227	4th PPS	Europe	C12	H29	Female	48	15.899999618530273	Teicoplanin	160	mg	1	160	10.062893323187998	Pyrexia of Unknown Origin (PUO)	CAI	Empirical: pathogen determined	No Ventilation	4	4	1	0	0	0	0	0	0	1	0	0	0	0	0	0	0	0
4th PPS/C12H29P228	4th PPS	Europe	C12	H29	Male	132	38	Clindamycin	150	mg	4	600	15.789473684210526	Sepsis	CAI	Targeted	No Ventilation	3	2	1	0	0	0	0	0	1	0	0	0	0	0	0	0	0	0
4th PPS/C12H29P229	4th PPS	Europe	C12	H29	Male	18	10.399999618530273	Ceftriaxone	500	mg	1	500	48.07692484037417	Central Nervous System (CNS) infections	CAI	Empirical: pathogen determined	No Ventilation	3	2	3	0	0	0	0	0	0	0	0	0	1	0	0	1	1	0
4th PPS/C12H29P230	4th PPS	Europe	C12	H29	Male	18	10.399999618530273	Amikacin	100	mg	1	100	9.615384968074833	Sepsis	CAI	Empirical: pathogen determined	No Ventilation	3	2	3	0	0	0	0	0	0	0	0	0	1	0	0	1	1	0
4th PPS/C12H29P231	4th PPS	Europe	C12	H29	Female	36	10.399999618530273	Amikacin	210	mg	1	210	20.19230843295715	Sepsis	Unknown	Empirical: awaiting culture	No Ventilation	6	3	2	0	0	0	0	1	1	0	0	0	0	0	0	0	0	0
4th PPS/C12H29P232	4th PPS	Europe	C12	H29	Female	36	10.399999618530273	Vancomycin	120	mg	3	360	34.6153858850694	Sepsis	Unknown	Empirical: awaiting culture	No Ventilation	6	3	2	0	0	0	0	1	1	0	0	0	0	0	0	0	0	0
4th PPS/C12H29P233	4th PPS	Europe	C12	H29	Female	36	10.399999618530273	Meropenem	210	mg	3	630	60.57692529887145	Sepsis	Unknown	Empirical: awaiting culture	No Ventilation	6	3	2	0	0	0	0	1	1	0	0	0	0	0	0	0	0	0
4th PPS/C12H29P234	4th PPS	Europe	C12	H29	Male	15	5.800000190734863	Meropenem	200	mg	3	600	103.4482724601393	Bacterial LRTI	HAI	Targeted	Non-Invasive Ventilation	3	2	3	0	0	0	0	0	0	0	0	0	1	0	0	1	0	1
4th PPS/C12H29P235	4th PPS	Europe	C12	H29	Male	72	16	Ceftazidime	435	mg	3	1305	81.5625	Febrile neutropenia/Fever	Unknown	Empirical: awaiting culture	No Ventilation	5	3	2	0	0	0	0	0	3	0	0	0	1	0	0	0	0	0
4th PPS/C12H27P24	4th PPS	Europe	C12	H27	Male	36	15.699999809265137	Ceftriaxone	785	mg	1	785	50.00000060743588	Sepsis	CAI	Empirical: pathogen determined	No Ventilation	1	1	1	0	0	0	0	0	1	0	0	0	0	0	0	0	0	0
4th PPS/C12H27P25	4th PPS	Europe	C12	H27	Male	14	11	Ceftriaxone	880	mg	1	880	80	Viral LRTI	CAI	Empirical: pathogen determined	No Ventilation	2	2	0	0	0	0	0	0	0	0	0	0	0	0	0	0	0	0
4th PPS/C12H27P26	4th PPS	Europe	C12	H27	Male	96	30.600000381469727	Gentamicin	210	mg	1	210	6.8627450124859655	GI tract infections	CAI	Empirical: pathogen determined	No Ventilation	3	3	0	0	0	0	0	0	0	0	0	0	0	0	0	0	0	0
4th PPS/C12H27P27	4th PPS	Europe	C12	H27	Male	96	30.600000381469727	Co-amoxiclav	900	mg	3	2700	88.2352930176767	GI tract infections	CAI	Empirical: pathogen determined	No Ventilation	3	3	0	0	0	0	0	0	0	0	0	0	0	0	0	0	0	0
4th PPS/C12H27P28	4th PPS	Europe	C12	H27	Male	96	30.600000381469727	Metronidazole	225	mg	3	675	22.058823254419174	GI tract infections	CAI	Empirical: pathogen determined	No Ventilation	3	3	0	0	0	0	0	0	0	0	0	0	0	0	0	0	0	0
4th PPS/C12H25P6	4th PPS	Europe	C12	H25	Male	2	6.75	Ceftriaxone	336	mg	1	336	49.77777777777778	Other	Unknown	Unknown	No Ventilation	1	1	0	0	0	0	0	0	0	0	0	0	0	0	0	0	0	0
4th PPS/C12H30P4	4th PPS	Europe	C12	H30	Female	1	2.5399999618530273	Co-amoxiclav	80	mg	2	160	62.992126930298795	Bacterial LRTI	CAI	Targeted	No Ventilation	1	1	0	0	0	0	0	0	0	0	0	0	0	0	0	0	0	0
4th PPS/C12H30P5	4th PPS	Europe	C12	H30	Female	132	48.5	Ceftriaxone	2000	mg	1	2000	41.23711340206186	Sepsis	CAI	Empirical: pathogen determined	No Ventilation	1	1	0	0	0	0	0	0	0	0	0	0	0	0	0	0	0	0
4th PPS/C12H28P17	4th PPS	Europe	C12	H28	Male	24	12.300000190734863	Cefuroxime	600	mg	3	1800	146.34146114533183	Bacterial LRTI	CAI	Empirical: awaiting culture	No Ventilation	2	2	0	0	0	0	0	0	0	0	0	0	0	0	0	0	0	0
4th PPS/C12H28P18	4th PPS	Europe	C12	H28	Male	24	12.300000190734863	Clindamycin	50	mg	4	200	16.260162349481313	Bacterial LRTI	CAI	Empirical: awaiting culture	No Ventilation	2	2	0	0	0	0	0	0	0	0	0	0	0	0	0	0	0	0
4th PPS/C12H28P19	4th PPS	Europe	C12	H28	Female	12	8.100000381469727	Ceftriaxone	405	mg	1	405	49.99999764524871	Sepsis	CAI	Empirical: awaiting culture	No Ventilation	1	1	0	0	0	0	0	0	0	0	0	0	0	0	0	0	0	0
4th PPS/C12H34P27	4th PPS	Europe	C12	H34	Female	2	1	Metronidazole	7.5	mg	3	22.5	22.5	GI tract infections	HAI	Empirical: awaiting culture	Non-Invasive Ventilation	3	3	3	0	0	1	0	0	0	0	0	0	0	0	0	1	0	2
4th PPS/C12H34P28	4th PPS	Europe	C12	H34	Female	2	1	Gentamicin	5	mg	1	5	5	GI tract infections	HAI	Empirical: awaiting culture	Non-Invasive Ventilation	3	3	3	0	0	1	0	0	0	0	0	0	0	0	0	1	0	2
4th PPS/C12H34P29	4th PPS	Europe	C12	H34	Male	1	0.7599999904632568	Gentamicin	3.799999952316284	mg	1	3.799999952316284	5	Sepsis	HAI	Empirical: pathogen determined	Invasive Ventilation	3	2	3	0	0	1	0	0	0	0	0	0	0	0	0	1	0	1
4th PPS/C12H34P30	4th PPS	Europe	C12	H34	Male	17	12.600000381469727	Ceftriaxone	1010	mg	1	1010	80.1587277318946	Joint/Bone Infections	CAI	Empirical: no culture	No Ventilation	2	2	0	0	0	0	0	0	0	0	0	0	0	0	0	0	0	0
4th PPS/C12H34P31	4th PPS	Europe	C12	H34	Male	17	12.600000381469727	Metronidazole	96	mg	3	288	22.857142165134302	Joint/Bone Infections	CAI	Empirical: pathogen determined	No Ventilation	2	2	0	0	0	0	0	0	0	0	0	0	0	0	0	0	0	0
4th PPS/C12H34P32	4th PPS	Europe	C12	H34	Male	84	26.299999237060547	Metronidazole	197	mg	3	591	22.47148354161146	GI tract infections	CAI	Empirical: pathogen determined	No Ventilation	3	3	0	0	0	0	0	0	0	0	0	0	0	0	0	0	0	0
4th PPS/C12H34P33	4th PPS	Europe	C12	H34	Male	84	26.299999237060547	Gentamicin	180	mg	1	180	6.844106662419733	GI tract infections	CAI	Empirical: pathogen determined	No Ventilation	3	3	0	0	0	0	0	0	0	0	0	0	0	0	0	0	0	0
4th PPS/C12H34P34	4th PPS	Europe	C12	H34	Male	84	26.299999237060547	Co-amoxiclav	789	mg	3	2367	90.0000026108195	GI tract infections	CAI	Empirical: pathogen determined	No Ventilation	3	3	0	0	0	0	0	0	0	0	0	0	0	0	0	0	0	0
4th PPS/C12H34P35	4th PPS	Europe	C12	H34	Male	14	8.550000190734863	Gentamicin	60	mg	1	60	7.017543703100557	Sepsis	HAI	Empirical: pathogen determined	Non-Invasive Ventilation	2	2	3	0	0	0	0	0	0	0	1	0	1	0	0	1	0	0
4th PPS/C12H34P36	4th PPS	Europe	C12	H34	Male	14	8.550000190734863	Ceftriaxone	426	mg	1	426	49.824560292013956	Sepsis	HAI	Empirical: pathogen determined	Non-Invasive Ventilation	2	2	3	0	0	0	0	0	0	0	1	0	1	0	0	1	0	0
4th PPS/C12H34P37	4th PPS	Europe	C12	H34	Male	23	11.5	Ceftriaxone	920	mg	1	920	80	Central Nervous System (CNS) infections	CAI	Empirical: pathogen determined	No Ventilation	2	1	0	0	0	0	0	0	0	0	0	0	0	0	0	0	0	0
4th PPS/C12H34P38	4th PPS	Europe	C12	H34	Male	132	58	Cefuroxime	1500	mg	4	6000	103.44827586206897	Bacterial LRTI	HAI	Empirical: pathogen determined	No Ventilation	3	3	2	0	0	0	0	0	0	0	0	0	0	0	1	0	0	1
4th PPS/C12H34P39	4th PPS	Europe	C12	H34	Male	132	58	Gentamicin	400	mg	1	400	6.896551724137931	Bacterial LRTI	HAI	Empirical: pathogen determined	No Ventilation	3	3	2	0	0	0	0	0	0	0	0	0	0	0	1	0	0	1
4th PPS/C12H34P40	4th PPS	Europe	C12	H34	Male	1	5.300000190734863	Ceftriaxone	425	mg	1	425	80.18867635947619	Skin/Soft Tissue Infections (SSTI)	CAI	Empirical: pathogen determined	No Ventilation	2	2	0	0	0	0	0	0	0	0	0	0	0	0	0	0	0	0
4th PPS/C12H34P41	4th PPS	Europe	C12	H34	Male	1	5.300000190734863	Metronidazole	40	mg	3	120	22.641508619146215	Skin/Soft Tissue Infections (SSTI)	CAI	Empirical: pathogen determined	No Ventilation	2	2	0	0	0	0	0	0	0	0	0	0	0	0	0	0	0	0
4th PPS/C12H34P42	4th PPS	Europe	C12	H34	Female	4	4.800000190734863	Gentamicin	38	mg	1	38	7.91666635208661	Sepsis	HAI	Empirical: pathogen determined	Invasive Ventilation	3	2	1	0	0	0	0	1	0	0	0	0	0	0	0	0	0	0
4th PPS/C12H34P43	4th PPS	Europe	C12	H34	Female	4	4.800000190734863	Pip-taz	430	mg	4	1720	358.33331909444655	Sepsis	HAI	Empirical: pathogen determined	Invasive Ventilation	3	2	1	0	0	0	0	1	0	0	0	0	0	0	0	0	0	0
4th PPS/C12H34P44	4th PPS	Europe	C12	H34	Male	72	15.800000190734863	Gentamicin	120	mg	1	120	7.594936617176	Skin/Soft Tissue Infections (SSTI)	HAI	Empirical: awaiting culture	Invasive Ventilation	2	2	3	0	0	1	0	0	0	0	0	0	2	0	0	0	0	0
4th PPS/C12H34P45	4th PPS	Europe	C12	H34	Male	8	6.099999904632568	Pip-taz	540	mg	4	2160	354.0983661917134	Bacterial LRTI	HAI	Empirical: pathogen determined	Invasive Ventilation	2	2	2	0	0	0	0	0	0	0	0	0	0	0	0	1	0	1
4th PPS/C12H34P46	4th PPS	Europe	C12	H34	Male	8	6.099999904632568	Gentamicin	48	mg	1	48	7.868852582038076	Bacterial LRTI	HAI	Empirical: pathogen determined	Invasive Ventilation	2	2	2	0	0	0	0	0	0	0	0	0	0	0	0	1	0	1
4th PPS/C12H34P47	4th PPS	Europe	C12	H34	Male	2	3	Gentamicin	24	mg	1	24	8	Sepsis	CAI	Empirical: pathogen determined	Invasive Ventilation	3	3	1	0	0	0	0	0	0	0	0	0	0	0	0	1	0	0
4th PPS/C12H34P48	4th PPS	Europe	C12	H34	Male	2	3	Cefotaxime	150	mg	3	450	150	Sepsis	CAI	Empirical: pathogen determined	Invasive Ventilation	3	3	1	0	0	0	0	0	0	0	0	0	0	0	0	1	0	0
4th PPS/C12H28P20	4th PPS	Europe	C12	H28	Male	19	7.949999809265137	Co-amoxiclav	240	mg	3	720	90.56603990869198	Bacterial LRTI	CAI	Empirical: awaiting culture	Non-Invasive Ventilation	1	1	0	0	0	0	0	0	0	0	0	0	0	0	0	0	0	0
4th PPS/C12H28P21	4th PPS	Europe	C12	H28	Male	120	35.79999923706055	Co-amoxiclav	1000	mg	3	3000	83.7988844674155	Bacterial LRTI	CAI	Empirical: awaiting culture	No Ventilation	1	1	1	0	0	0	0	0	0	0	0	0	2	0	0	0	0	0
4th PPS/C12H28P22	4th PPS	Europe	C12	H28	Female	3	5.699999809265137	Ceftriaxone	285	mg	1	285	50.00000167311289	Urinary Tract Infections (UTI)	CAI	Empirical: awaiting culture	No Ventilation	1	1	0	0	0	0	0	0	0	0	0	0	0	0	0	0	0	0
4th PPS/C12H28P23	4th PPS	Europe	C12	H28	Female	96	27.399999618530273	Ceftazidime	1370	mg	3	4110	150.00000208833794	Bacterial LRTI	CAI	Empirical: awaiting culture	Non-Invasive Ventilation	2	2	1	0	0	0	0	0	0	0	0	0	0	0	0	0	0	1
4th PPS/C12H28P24	4th PPS	Europe	C12	H28	Male	60	22.100000381469727	Co-amoxiclav	600	mg	3	1800	81.4479623950257	Treatment for Surgical disease	CAI	Empirical: awaiting culture	No Ventilation	1	1	0	0	0	0	0	0	0	0	0	0	0	0	0	0	0	0
4th PPS/C12H28P25	4th PPS	Europe	C12	H28	Male	1	4.900000095367432	Cefotaxime	250	mg	4	1000	204.0816286810733	Sepsis	CAI	Empirical: awaiting culture	No Ventilation	2	2	0	0	0	0	0	0	0	0	0	0	0	0	0	0	0	0
2nd PPS/C15H41P1	2nd PPS	Europe	C15	H41	Female	1	2.8499999046325684	Metronidazole	20	mg	2	40	14.03508818894397	Treatment for Surgical disease	HAI	Empirical: pathogen determined	No Ventilation	3	3	1	0	0	0	0	1	0	0	0	0	0	0	0	0	0	0
2nd PPS/C15H41P2	2nd PPS	Europe	C15	H41	Female	1	2.8499999046325684	Teicoplanin	20	mg	1	20	7.017544094471985	Treatment for Surgical disease	HAI	Empirical: pathogen determined	No Ventilation	3	3	1	0	0	0	0	1	0	0	0	0	0	0	0	0	0	0
2nd PPS/C15H41P3	2nd PPS	Europe	C15	H41	Female	1	2.8499999046325684	Gentamicin	10	mg	1	10	3.5087720472359925	Treatment for Surgical disease	HAI	Empirical: pathogen determined	No Ventilation	3	3	1	0	0	0	0	1	0	0	0	0	0	0	0	0	0	0
2nd PPS/C15H42P1	2nd PPS	Europe	C15	H42	Female	24	13.5	Cefotaxime	680	mg	3	2040	151.11111111111111	Urinary Tract Infections (UTI)	CAI	Empirical: pathogen determined	No Ventilation	1	1	0	0	0	0	0	0	0	0	0	0	0	0	0	0	0	0
2nd PPS/C15H42P2	2nd PPS	Europe	C15	H42	Female	48	16	Cefotaxime	800	mg	3	2400	150	Skin/Soft Tissue Infections (SSTI)	CAI	Empirical: awaiting culture	No Ventilation	2	2	0	0	0	0	0	0	0	0	0	0	0	0	0	0	0	0
2nd PPS/C15H42P3	2nd PPS	Europe	C15	H42	Female	48	16	Clindamycin	160	mg	4	640	40	Skin/Soft Tissue Infections (SSTI)	CAI	Empirical: awaiting culture	No Ventilation	2	2	0	0	0	0	0	0	0	0	0	0	0	0	0	0	0	0
2nd PPS/C15H42P4	2nd PPS	Europe	C15	H42	Female	9	8.600000381469727	Cefotaxime	450	mg	3	1350	156.97673722303801	Sepsis	CAI	Empirical: awaiting culture	No Ventilation	2	2	0	0	0	0	0	0	0	0	0	0	0	0	0	0	0	0
2nd PPS/C15H42P5	2nd PPS	Europe	C15	H42	Female	23	10	Clindamycin	100	mg	4	400	40	Skin/Soft Tissue Infections (SSTI)	CAI	Empirical: awaiting culture	No Ventilation	1	1	0	0	0	0	0	0	0	0	0	0	0	0	0	0	0	0
2nd PPS/C15H42P6	2nd PPS	Europe	C15	H42	Female	108	30	Clindamycin	300	mg	4	1200	40	Skin/Soft Tissue Infections (SSTI)	CAI	Empirical: awaiting culture	No Ventilation	2	2	0	0	0	0	0	0	0	0	0	0	0	0	0	0	0	0
2nd PPS/C15H42P7	2nd PPS	Europe	C15	H42	Female	36	16.799999237060547	Ampicillin	600	mg	4	2400	142.85714934472352	Unknown	CAI	Empirical: awaiting culture	No Ventilation	2	2	0	0	0	0	0	0	0	0	0	0	0	0	0	0	0	0
2nd PPS/C15H42P8	2nd PPS	Europe	C15	H42	Female	36	16.799999237060547	Cefotaxime	850	mg	3	2550	151.78572117876877	Unknown	CAI	Empirical: awaiting culture	No Ventilation	2	2	0	0	0	0	0	0	0	0	0	0	0	0	0	0	0	0
2nd PPS/C15H42P9	2nd PPS	Europe	C15	H42	Male	72	20	Cefotaxime	1000	mg	3	3000	150	Sepsis	CAI	Empirical: awaiting culture	No Ventilation	1	1	0	0	0	0	0	0	0	0	0	0	0	0	0	0	0	0
2nd PPS/C15H40P1	2nd PPS	Europe	C15	H40	Female	60	20	Co-amoxiclav	600	mg	3	1800	90	Skin/Soft Tissue Infections (SSTI)	CAI	Empirical: awaiting culture	No Ventilation	1	1	0	0	0	0	0	0	0	0	0	0	0	0	0	0	0	0
2nd PPS/C15H40P2	2nd PPS	Europe	C15	H40	Female	11	5.5	Meropenem	230	mg	3	690	125.45454545454545	Sepsis	HAI	Targeted	Invasive Ventilation	2	2	2	0	0	1	0	0	0	0	0	0	0	0	0	1	0	0
2nd PPS/C15H40P3	2nd PPS	Europe	C15	H40	Female	36	15	Amikacin	225	mg	1	225	15	Urinary Tract Infections (UTI)	CAI	Empirical: pathogen determined	No Ventilation	2	2	1	0	0	0	0	0	0	0	0	0	0	0	0	0	1	0
2nd PPS/C15H40P4	2nd PPS	Europe	C15	H40	Female	36	15	Ceftazidime	750	mg	3	2250	150	Urinary Tract Infections (UTI)	CAI	Empirical: pathogen determined	No Ventilation	2	2	1	0	0	0	0	0	0	0	0	0	0	0	0	0	1	0
2nd PPS/C15H40P5	2nd PPS	Europe	C15	H40	Male	1	3.325000047683716	Ampicillin	80	mg	4	320	96.24060012357612	Other	CAI	Empirical: pathogen determined	No Ventilation	2	2	0	0	0	0	0	0	0	0	0	0	0	0	0	0	0	0
2nd PPS/C15H40P6	2nd PPS	Europe	C15	H40	Male	1	3.325000047683716	Amikacin	50	mg	1	50	15.037593769308767	Other	CAI	Empirical: pathogen determined	No Ventilation	2	2	0	0	0	0	0	0	0	0	0	0	0	0	0	0	0	0
2nd PPS/C15H40P7	2nd PPS	Europe	C15	H40	Female	72	19	Amikacin	500	mg	1	500	26.31578947368421	CRBSI	HAI	Empirical: pathogen determined	Invasive Ventilation	2	2	2	0	0	0	0	0	0	0	0	0	1	0	0	0	0	1
2nd PPS/C15H40P8	2nd PPS	Europe	C15	H40	Female	72	19	Cefepime	1000	mg	4	4000	210.52631578947367	CRBSI	HAI	Empirical: pathogen determined	Invasive Ventilation	2	2	2	0	0	0	0	0	0	0	0	0	1	0	0	0	0	1
2nd PPS/C15H40P9	2nd PPS	Europe	C15	H40	Female	17	12	Co-amoxiclav	420	mg	3	1260	105	Skin/Soft Tissue Infections (SSTI)	Unknown	Unknown	Invasive Ventilation	2	2	1	0	0	0	0	0	0	0	1	0	0	0	0	0	0	0
2nd PPS/C15H40P10	2nd PPS	Europe	C15	H40	Female	13	9	Ceftazidime	450	mg	3	1350	150	Urinary Tract Infections (UTI)	CAI	Empirical: pathogen determined	No Ventilation	1	1	1	0	0	0	0	0	0	0	0	0	0	0	0	0	1	0
2nd PPS/C15H40P11	2nd PPS	Europe	C15	H40	Female	84	40	Clindamycin	400	mg	4	1600	40	Upper Respiratory Infections (URTI)	CAI	Empirical: no culture	No Ventilation	1	1	0	0	0	0	0	0	0	0	0	0	0	0	0	0	0	0
2nd PPS/C15H40P12	2nd PPS	Europe	C15	H40	Male	7	9.5	Cefuroxime	480	mg	3	1440	151.57894736842104	Urinary Tract Infections (UTI)	CAI	Targeted	No Ventilation	1	1	0	0	0	0	0	0	0	0	0	0	0	0	0	0	0	0
2nd PPS/C15H40P13	2nd PPS	Europe	C15	H40	Female	3	6	Cefuroxime	300	mg	3	900	150	Pyrexia of Unknown Origin (PUO)	CAI	Empirical: pathogen determined	No Ventilation	1	1	0	0	0	0	0	0	0	0	0	0	0	0	0	0	0	0
2nd PPS/C15H40P14	2nd PPS	Europe	C15	H40	Female	108	29	Gentamicin	210	mg	1	210	7.241379310344827	CRBSI	HAI	Targeted	No Ventilation	4	4	1	0	0	0	0	0	0	1	0	0	0	0	0	0	0	0
2nd PPS/C15H40P15	2nd PPS	Europe	C15	H40	Female	108	29	Teicoplanin	290	mg	1	290	10	CRBSI	HAI	Targeted	No Ventilation	4	4	1	0	0	0	0	0	0	1	0	0	0	0	0	0	0	0
2nd PPS/C15H40P16	2nd PPS	Europe	C15	H40	Female	108	29	Meropenem	1200	mg	3	3600	124.13793103448276	CRBSI	HAI	Targeted	No Ventilation	4	4	1	0	0	0	0	0	0	1	0	0	0	0	0	0	0	0
2nd PPS/C15H40P17	2nd PPS	Europe	C15	H40	Male	132	35	Teicoplanin	525	mg	1	525	15	Bacterial LRTI	HAI	Empirical: awaiting culture	No Ventilation	2	2	0	0	0	0	0	0	0	0	0	0	0	0	0	0	0	0
2nd PPS/C15H40P18	2nd PPS	Europe	C15	H40	Male	132	35	Cefuroxime	1500	mg	3	4500	128.57142857142858	Bacterial LRTI	HAI	Empirical: awaiting culture	No Ventilation	2	2	0	0	0	0	0	0	0	0	0	0	0	0	0	0	0	0
2nd PPS/C15H40P19	2nd PPS	Europe	C15	H40	Male	48	14.600000381469727	Amikacin	300	mg	1	300	20.54794466860145	Skin/Soft Tissue Infections (SSTI)	HAI	Empirical: awaiting culture	No Ventilation	3	3	1	0	0	0	0	0	0	1	0	0	0	0	0	0	0	0
2nd PPS/C15H40P20	2nd PPS	Europe	C15	H40	Male	48	14.600000381469727	Ceftriaxone	1500	mg	1	1500	102.73972334300724	Skin/Soft Tissue Infections (SSTI)	Unknown	Unknown	No Ventilation	3	3	1	0	0	0	0	0	0	1	0	0	0	0	0	0	0	0
2nd PPS/C15H40P21	2nd PPS	Europe	C15	H40	Male	108	25	Ceftriaxone	1250	mg	2	2500	100	Treatment for Surgical disease	CAI	Empirical: awaiting culture	No Ventilation	1	1	0	0	0	0	0	0	0	0	0	0	0	0	0	0	0	0
2nd PPS/C15H40P22	2nd PPS	Europe	C15	H40	Female	96	27	Amikacin	400	mg	1	400	14.814814814814815	Skin/Soft Tissue Infections (SSTI)	CAI	Empirical: awaiting culture	No Ventilation	2	2	0	0	0	0	0	0	0	0	0	0	0	0	0	0	0	0
2nd PPS/C15H40P23	2nd PPS	Europe	C15	H40	Male	3	3.799999952316284	Gentamicin	30	mg	1	30	7.894736941171156	Bacterial LRTI	CAI	Targeted	Invasive Ventilation	3	3	1	0	0	0	0	0	0	0	0	0	0	0	0	0	0	1
2nd PPS/C15H40P24	2nd PPS	Europe	C15	H40	Male	3	3.799999952316284	Ciprofloxacin	40	mg	3	120	31.578947764684624	Bacterial LRTI	CAI	Targeted	Invasive Ventilation	3	3	1	0	0	0	0	0	0	0	0	0	0	0	0	0	0	1
2nd PPS/C15H40P25	2nd PPS	Europe	C15	H40	Male	96	21	Ceftriaxone	1000	mg	2	2000	95.23809523809524	Central Nervous System (CNS) infections	CAI	Empirical: awaiting culture	Invasive Ventilation	2	2	0	0	0	0	0	0	0	0	0	0	0	0	0	0	0	0
2nd PPS/C15H40P26	2nd PPS	Europe	C15	H40	Male	96	21	Teicoplanin	315	mg	1	315	15	Central Nervous System (CNS) infections	CAI	Empirical: awaiting culture	Invasive Ventilation	2	2	0	0	0	0	0	0	0	0	0	0	0	0	0	0	0	0
2nd PPS/C15H40P27	2nd PPS	Europe	C15	H40	Male	48	17.899999618530273	Meropenem	780	mg	3	2340	130.7262597691682	Sepsis	HAI	Targeted	No Ventilation	4	3	1	0	0	0	0	0	0	1	0	0	0	0	0	0	0	0
2nd PPS/C15H40P28	2nd PPS	Europe	C15	H40	Female	13	7.199999809265137	Cefepime	350	mg	4	1400	194.44444959546325	CRBSI	HAI	Empirical: pathogen determined	No Ventilation	1	1	1	0	0	0	0	0	0	0	0	0	0	0	0	1	0	0
2nd PPS/C15H40P29	2nd PPS	Europe	C15	H40	Male	36	13	Ceftriaxone	650	mg	2	1300	100	Bacterial LRTI	CAI	Empirical: awaiting culture	No Ventilation	2	2	0	0	0	0	0	0	0	0	0	0	0	0	0	0	0	0
2nd PPS/C15H40P30	2nd PPS	Europe	C15	H40	Male	36	13	Vancomycin	200	mg	4	800	61.53846153846154	Bacterial LRTI	CAI	Empirical: awaiting culture	No Ventilation	2	2	0	0	0	0	0	0	0	0	0	0	0	0	0	0	0	0
2nd PPS/C15H38P1	2nd PPS	Europe	C15	H38	Female	19	12	Cefepime	1200	mg	2	2400	200	Urinary Tract Infections (UTI)	CAI	Targeted	No Ventilation	1	1	0	0	0	0	0	0	0	0	0	0	0	0	0	0	0	0
2nd PPS/C15H38P2	2nd PPS	Europe	C15	H38	Female	18	11.399999618530273	Ceftriaxone	1140	mg	1	1140	100.00000334622578	Skin/Soft Tissue Infections (SSTI)	Unknown	Empirical: awaiting culture	No Ventilation	2	2	0	0	0	0	0	0	0	0	0	0	0	0	0	0	0	0
2nd PPS/C15H38P3	2nd PPS	Europe	C15	H38	Male	48	20	Ceftriaxone	2000	mg	1	2000	100	Skin/Soft Tissue Infections (SSTI)	CAI	Empirical: awaiting culture	No Ventilation	2	2	0	0	0	0	0	0	0	0	0	0	0	0	0	0	0	0
2nd PPS/C15H39P1	2nd PPS	Europe	C15	H39	Male	2	5	Cefotaxime	250	mg	3	750	150	Sepsis	CAI	Empirical: pathogen determined	No Ventilation	1	1	0	0	0	0	0	0	0	0	0	0	0	0	0	0	0	0
2nd PPS/C15H39P2	2nd PPS	Europe	C15	H39	Female	4	6	Cefotaxime	300	mg	3	900	150	Sepsis	CAI	Empirical: pathogen determined	No Ventilation	1	1	0	0	0	0	0	0	0	0	0	0	0	0	0	0	0	0
2nd PPS/C15H39P3	2nd PPS	Europe	C15	H39	Male	48	20	Clindamycin	260	mg	3	780	39	Skin/Soft Tissue Infections (SSTI)	CAI	Empirical: pathogen determined	No Ventilation	1	1	0	0	0	0	0	0	0	0	0	0	0	0	0	0	0	0
3rd PPS/C15H41P4	3rd PPS	Europe	C15	H41	Male	1	3.3399999141693115	Gentamicin	14	mg	1	14	4.1916168741824436	CRBSI	HAI	Targeted	No Ventilation	1	1	1	0	0	0	0	0	0	0	0	0	1	0	0	0	0	0
3rd PPS/C15H38P4	3rd PPS	Europe	C15	H38	Female	84	30.700000762939453	Ceftriaxone	2450	mg	1	2450	79.80455827732749	Urinary Tract Infections (UTI)	CAI	Targeted	No Ventilation	1	1	0	0	0	0	0	0	0	0	0	0	0	0	0	0	0	0
3rd PPS/C15H40P31	3rd PPS	Europe	C15	H40	Male	2	4.800000190734863	Ampicillin	120	mg	4	480	99.99999602635717	Urinary Tract Infections (UTI)	CAI	Empirical: pathogen determined	No Ventilation	2	2	1	0	0	0	0	0	0	0	0	0	0	0	0	0	1	0
3rd PPS/C15H40P32	3rd PPS	Europe	C15	H40	Male	2	4.800000190734863	Amikacin	70	mg	1	70	14.583332753843754	Urinary Tract Infections (UTI)	CAI	Empirical: pathogen determined	No Ventilation	2	2	1	0	0	0	0	0	0	0	0	0	0	0	0	0	1	0
3rd PPS/C15H40P33	3rd PPS	Europe	C15	H40	Female	72	23	Teicoplanin	230	mg	1	230	10	Pyrexia of Unknown Origin (PUO)	HAI	Empirical: awaiting culture	No Ventilation	4	4	1	0	0	0	0	0	0	1	0	0	0	0	0	0	0	0
3rd PPS/C15H40P34	3rd PPS	Europe	C15	H40	Female	72	23	Ceftazidime	1150	mg	3	3450	150	Pyrexia of Unknown Origin (PUO)	HAI	Empirical: awaiting culture	No Ventilation	4	4	1	0	0	0	0	0	0	1	0	0	0	0	0	0	0	0
3rd PPS/C15H40P35	3rd PPS	Europe	C15	H40	Female	72	23	Amikacin	460	mg	1	460	20	Pyrexia of Unknown Origin (PUO)	HAI	Empirical: awaiting culture	No Ventilation	4	4	1	0	0	0	0	0	0	1	0	0	0	0	0	0	0	0
3rd PPS/C15H40P36	3rd PPS	Europe	C15	H40	Female	36	16	Clindamycin	160	mg	4	640	40	Upper Respiratory Infections (URTI)	CAI	Empirical: pathogen determined	No Ventilation	1	1	1	0	0	0	0	0	0	0	0	0	0	0	1	0	0	0
3rd PPS/C15H40P37	3rd PPS	Europe	C15	H40	Male	84	38	Ceftriaxone	2000	mg	2	4000	105.26315789473684	Bacterial LRTI	CAI	Empirical: awaiting culture	No Ventilation	2	2	1	0	0	0	0	0	0	0	0	0	0	0	0	0	0	1
3rd PPS/C15H40P38	3rd PPS	Europe	C15	H40	Female	16	10.5	Amikacin	150	mg	1	150	14.285714285714286	Urinary Tract Infections (UTI)	CAI	Targeted	No Ventilation	2	2	1	0	0	0	0	0	0	0	0	0	0	0	0	0	1	0
3rd PPS/C15H40P39	3rd PPS	Europe	C15	H40	Female	16	10.5	Ceftriaxone	525	mg	2	1050	100	Urinary Tract Infections (UTI)	CAI	Targeted	No Ventilation	2	2	1	0	0	0	0	0	0	0	0	0	0	0	0	0	1	0
3rd PPS/C15H40P40	3rd PPS	Europe	C15	H40	Male	132	26.5	Amikacin	132	mg	1	132	4.981132075471698	Sepsis	CAI	Empirical: pathogen determined	No Ventilation	2	2	2	0	0	0	0	1	0	0	0	0	0	0	0	0	1	0
3rd PPS/C15H40P41	3rd PPS	Europe	C15	H40	Male	132	26.5	Ceftriaxone	1300	mg	1	1300	49.056603773584904	Sepsis	CAI	Empirical: pathogen determined	No Ventilation	2	2	2	0	0	0	0	1	0	0	0	0	0	0	0	0	1	0
3rd PPS/C15H40P42	3rd PPS	Europe	C15	H40	Male	36	18	Ceftriaxone	900	mg	2	1800	100	Upper Respiratory Infections (URTI)	CAI	Empirical: awaiting culture	No Ventilation	1	1	1	0	0	0	0	0	0	0	0	0	0	0	0	0	0	1
3rd PPS/C15H40P43	3rd PPS	Europe	C15	H40	Female	120	50	Ceftazidime	2500	mg	3	7500	150	Pyrexia of Unknown Origin (PUO)	CAI	Empirical: pathogen determined	No Ventilation	3	3	1	0	0	0	0	0	1	0	0	0	0	0	0	0	0	0
3rd PPS/C15H40P44	3rd PPS	Europe	C15	H40	Female	120	50	Amikacin	750	mg	1	750	15	Pyrexia of Unknown Origin (PUO)	CAI	Empirical: pathogen determined	No Ventilation	3	3	1	0	0	0	0	0	1	0	0	0	0	0	0	0	0	0
3rd PPS/C15H40P45	3rd PPS	Europe	C15	H40	Female	120	50	Teicoplanin	400	mg	1	400	8	Pyrexia of Unknown Origin (PUO)	CAI	Empirical: pathogen determined	No Ventilation	3	3	1	0	0	0	0	0	1	0	0	0	0	0	0	0	0	0
3rd PPS/C15H40P46	3rd PPS	Europe	C15	H40	Male	72	23.5	Ceftazidime	1200	mg	3	3600	153.19148936170214	Bacterial LRTI	CAI	Empirical: pathogen determined	No Ventilation	2	2	1	0	0	0	0	0	0	0	0	0	0	0	0	0	0	1
3rd PPS/C15H40P47	3rd PPS	Europe	C15	H40	Male	72	23.5	Amikacin	500	mg	1	500	21.27659574468085	Bacterial LRTI	CAI	Empirical: pathogen determined	No Ventilation	2	2	1	0	0	0	0	0	0	0	0	0	0	0	0	0	0	1
3rd PPS/C15H40P48	3rd PPS	Europe	C15	H40	Male	24	12	Amikacin	180	mg	1	180	15	Treatment for Surgical disease	HAI	Empirical: awaiting culture	No Ventilation	2	2	1	0	0	0	0	0	0	0	0	0	0	0	0	0	1	0
3rd PPS/C15H40P49	3rd PPS	Europe	C15	H40	Male	132	30	Gentamicin	180	mg	1	180	6	CRBSI	HAI	Targeted	No Ventilation	4	4	1	0	0	0	0	0	0	1	0	0	0	0	0	0	0	0
3rd PPS/C15H40P50	3rd PPS	Europe	C15	H40	Female	14	7	Co-amoxiclav	175	mg	3	525	75	Treatment for Surgical disease	Unknown	Empirical: awaiting culture	No Ventilation	2	1	1	0	0	0	0	1	0	0	0	0	0	0	0	0	0	0
3rd PPS/C15H40P51	3rd PPS	Europe	C15	H40	Male	36	11	Cefuroxime	500	mg	3	1500	136.36363636363637	Bacterial LRTI	CAI	Empirical: awaiting culture	No Ventilation	1	1	2	0	0	0	0	0	0	0	1	0	0	0	0	0	0	1
3rd PPS/C15H40P52	3rd PPS	Europe	C15	H40	Female	11	7	Metronidazole	55	mg	4	220	31.428571428571427	Treatment for Surgical disease	CAI	Empirical: awaiting culture	Unknown	4	3	1	0	0	0	0	1	0	0	0	0	0	0	0	0	0	0
3rd PPS/C15H40P53	3rd PPS	Europe	C15	H40	Female	11	7	Cefuroxime	350	mg	3	1050	150	Treatment for Surgical disease	CAI	Empirical: awaiting culture	Unknown	4	3	1	0	0	0	0	1	0	0	0	0	0	0	0	0	0	0
3rd PPS/C15H40P54	3rd PPS	Europe	C15	H40	Female	11	7	Amikacin	140	mg	1	140	20	Treatment for Surgical disease	CAI	Empirical: awaiting culture	Unknown	4	3	1	0	0	0	0	1	0	0	0	0	0	0	0	0	0	0
3rd PPS/C15H40P55	3rd PPS	Europe	C15	H40	Male	8	5.300000190734863	Vancomycin	75	mg	4	300	56.60377154786554	Bacterial LRTI	HAI	Targeted	Invasive Ventilation	4	4	1	0	0	0	0	0	0	0	0	0	0	0	0	0	0	1
3rd PPS/C15H40P56	3rd PPS	Europe	C15	H40	Male	6	8.899999618530273	Gentamicin	20	mg	1	20	2.2471911075545368	Bacterial LRTI	HAI	Targeted	Invasive Ventilation	3	3	2	0	0	0	0	1	0	0	0	0	0	0	0	0	1	0
3rd PPS/C15H40P57	3rd PPS	Europe	C15	H40	Male	6	8.899999618530273	Teicoplanin	55	mg	1	55	6.179775545774977	GI tract infections	HAI	Targeted	Invasive Ventilation	3	3	2	0	0	0	0	1	0	0	0	0	0	0	0	0	1	0
3rd PPS/C15H40P58	3rd PPS	Europe	C15	H40	Male	6	8.899999618530273	Meropenem	345	mg	1	345	38.76404660531576	Bacterial LRTI	HAI	Targeted	Invasive Ventilation	3	3	2	0	0	0	0	1	0	0	0	0	0	0	0	0	1	0
3rd PPS/C15H40P59	3rd PPS	Europe	C15	H40	Female	2	1.559999942779541	Vancomycin	23	mg	3	69	44.230770853144236	Bacterial LRTI	HAI	Empirical: pathogen determined	No Ventilation	2	2	2	0	0	0	0	0	0	0	0	0	0	0	0	1	0	1
3rd PPS/C15H40P60	3rd PPS	Europe	C15	H40	Female	2	1.559999942779541	Meropenem	46	mg	3	138	88.46154170628847	Bacterial LRTI	HAI	Empirical: pathogen determined	No Ventilation	2	2	2	0	0	0	0	0	0	0	0	0	0	0	0	1	0	1
3rd PPS/C15H40P61	3rd PPS	Europe	C15	H40	Female	1	3.2899999618530273	Meropenem	56	mg	3	168	51.0638303793102	GI tract infections	HAI	Empirical: pathogen determined	No Ventilation	1	1	1	0	0	0	0	1	0	0	0	0	0	0	0	0	0	0
3rd PPS/C15H40P62	3rd PPS	Europe	C15	H40	Male	2	4	Metronidazole	28	mg	4	112	28	Treatment for Surgical disease	HAI	Empirical: pathogen determined	No Ventilation	3	3	2	0	0	0	0	0	0	0	0	0	0	0	0	1	0	1
3rd PPS/C15H40P63	3rd PPS	Europe	C15	H40	Male	72	25	Ampicillin	1000	mg	4	4000	160	Urinary Tract Infections (UTI)	CAI	Targeted	No Ventilation	1	1	1	0	0	0	0	0	0	0	0	0	0	0	0	0	1	0
4th PPS/C15H41P5	4th PPS	Europe	C15	H41	Female	1	2.450000047683716	Meropenem	45	mg	3	135	55.1020397438898	Sepsis	HAI	Targeted	No Ventilation	1	1	2	0	0	0	0	1	0	0	0	0	0	0	0	0	1	0
4th PPS/C15H41P6	4th PPS	Europe	C15	H41	Female	48	20	Teicoplanin	200	mg	1	200	10	Sepsis	HAI	Targeted	Invasive Ventilation	4	2	1	0	0	0	0	0	0	1	0	0	0	0	0	0	0	0
4th PPS/C15H42P10	4th PPS	Europe	C15	H42	Female	120	42.5	Co-amoxiclav	1400	mg	3	4200	98.82352941176471	Acute Otitis Media (AOM)	CAI	Empirical: awaiting culture	No Ventilation	1	1	1	0	0	0	1	0	0	0	0	0	0	0	0	0	0	0
4th PPS/C15H42P11	4th PPS	Europe	C15	H42	Male	5	6.400000095367432	Cefotaxime	320	mg	3	960	149.99999776482585	Central Nervous System (CNS) infections	CAI	Empirical: awaiting culture	No Ventilation	3	1	0	0	0	0	0	0	0	0	0	0	0	0	0	0	0	0
4th PPS/C15H42P12	4th PPS	Europe	C15	H42	Female	96	44	Clindamycin	450	mg	4	1800	40.90909090909091	Skin/Soft Tissue Infections (SSTI)	CAI	Empirical: awaiting culture	No Ventilation	1	1	0	0	0	0	0	0	0	0	0	0	0	0	0	0	0	0
4th PPS/C15H42P13	4th PPS	Europe	C15	H42	Male	72	22.100000381469727	Ceftriaxone	2000	mg	1	2000	90.497735994473	Bacterial LRTI	CAI	Empirical: awaiting culture	No Ventilation	1	1	0	0	0	0	0	0	0	0	0	0	0	0	0	0	0	0
4th PPS/C15H38P5	4th PPS	Europe	C15	H38	Male	2	5.25	Cefotaxime	263	mg	3	789	150.28571428571428	Sepsis	CAI	Empirical: pathogen determined	No Ventilation	1	1	0	0	0	0	0	0	0	0	0	0	0	0	0	0	0	0
4th PPS/C15H38P6	4th PPS	Europe	C15	H38	Male	60	23.5	Co-amoxiclav	528	mg	4	2112	89.87234042553192	Bacterial LRTI	CAI	Empirical: pathogen determined	No Ventilation	2	2	1	0	0	0	0	1	0	0	0	0	0	0	0	0	0	0
4th PPS/C15H38P7	4th PPS	Europe	C15	H38	Male	2	6.199999809265137	Ampicillin	310	mg	4	1240	200.0000061527377	Bacterial LRTI	CAI	Empirical: pathogen determined	No Ventilation	1	1	0	0	0	0	0	0	0	0	0	0	0	0	0	0	0	0
4th PPS/C15H38P8	4th PPS	Europe	C15	H38	Male	7	6.179999828338623	Cefuroxime	310	mg	3	930	150.4854410732262	Urinary Tract Infections (UTI)	CAI	Targeted	No Ventilation	1	1	0	0	0	0	0	0	0	0	0	0	0	0	0	0	0	0
4th PPS/C15H38P9	4th PPS	Europe	C15	H38	Male	17	11.199999809265137	Cefuroxime	560	mg	3	1680	150.0000025544848	Joint/Bone Infections	CAI	Empirical: pathogen determined	No Ventilation	1	1	0	0	0	0	0	0	0	0	0	0	0	0	0	0	0	0
4th PPS/C15H39P4	4th PPS	Europe	C15	H39	Male	22	12	Ceftriaxone	75	mg	1	75	6.25	Bacterial LRTI	CAI	Empirical: awaiting culture	No Ventilation	1	1	0	0	0	0	0	0	0	0	0	0	0	0	0	0	0	0
4th PPS/C15H39P5	4th PPS	Europe	C15	H39	Male	6	6	Cefuroxime	50	mg	3	150	25	Urinary Tract Infections (UTI)	CAI	Empirical: pathogen determined	No Ventilation	1	1	0	0	0	0	0	0	0	0	0	0	0	0	0	0	0	0
4th PPS/C15H39P6	4th PPS	Europe	C15	H39	Female	12	9	Clindamycin	30	mg	3	90	10	Unknown	CAI	Empirical: pathogen determined	No Ventilation	2	2	0	0	0	0	0	0	0	0	0	0	0	0	0	0	0	0
4th PPS/C15H39P7	4th PPS	Europe	C15	H39	Female	12	9	Ceftriaxone	75	mg	1	75	8.333333333333334	Skin/Soft Tissue Infections (SSTI)	CAI	Empirical: awaiting culture	No Ventilation	2	2	0	0	0	0	0	0	0	0	0	0	0	0	0	0	0	0
4th PPS/C15H40P64	4th PPS	Europe	C15	H40	Male	2	3.1700000762939453	Ceftazidime	160	mg	3	480	151.41955471533274	Bacterial LRTI	HAI	Empirical: awaiting culture	No Ventilation	2	2	0	0	0	0	0	0	0	0	0	0	0	0	0	0	0	0
4th PPS/C15H40P65	4th PPS	Europe	C15	H40	Male	2	3.1700000762939453	Amikacin	45	mg	1	45	14.195583254562443	Bacterial LRTI	HAI	Empirical: awaiting culture	No Ventilation	2	2	0	0	0	0	0	0	0	0	0	0	0	0	0	0	0	0
4th PPS/C15H40P66	4th PPS	Europe	C15	H40	Female	24	7	Amikacin	100	mg	1	100	14.285714285714286	Bacterial LRTI	HAI	Empirical: awaiting culture	Invasive Ventilation	2	2	1	0	0	0	0	0	0	0	0	0	0	0	0	0	0	1
4th PPS/C15H40P67	4th PPS	Europe	C15	H40	Female	24	7	Ceftazidime	350	mg	3	1050	150	Bacterial LRTI	HAI	Empirical: awaiting culture	Invasive Ventilation	2	2	1	0	0	0	0	0	0	0	0	0	0	0	0	0	0	1
4th PPS/C15H40P68	4th PPS	Europe	C15	H40	Male	16	10	Vancomycin	150	mg	4	600	60	Unknown	Unknown	Unknown	No Ventilation	2	2	0	0	0	0	0	0	0	0	0	0	0	0	0	0	0	0
4th PPS/C15H40P69	4th PPS	Europe	C15	H40	Female	16	9.600000381469727	Pip-taz	1000	mg	4	4000	416.66665010982155	Bacterial LRTI	HAI	Empirical: awaiting culture	No Ventilation	4	3	1	0	0	0	0	0	0	0	0	0	0	0	1	0	0	0
4th PPS/C15H40P70	4th PPS	Europe	C15	H40	Female	10	10	Teicoplanin	100	mg	1	100	10	Pyrexia of Unknown Origin (PUO)	CAI	Empirical: pathogen determined	No Ventilation	4	4	1	0	0	0	0	0	0	0	0	0	0	0	1	0	0	0
4th PPS/C15H40P71	4th PPS	Europe	C15	H40	Female	10	10	Amikacin	150	mg	1	150	15	Pyrexia of Unknown Origin (PUO)	CAI	Empirical: pathogen determined	No Ventilation	4	4	1	0	0	0	0	0	0	0	0	0	0	0	1	0	0	0
4th PPS/C15H40P72	4th PPS	Europe	C15	H40	Female	10	10	Meropenem	500	mg	3	1500	150	Pyrexia of Unknown Origin (PUO)	CAI	Empirical: pathogen determined	No Ventilation	4	4	1	0	0	0	0	0	0	0	0	0	0	0	1	0	0	0
4th PPS/C15H40P73	4th PPS	Europe	C15	H40	Male	24	13	Ciprofloxacin	130	mg	3	390	30	Bacterial LRTI	HAI	Empirical: pathogen determined	Invasive Ventilation	3	2	1	0	0	0	0	0	0	0	0	0	0	1	0	0	0	0
4th PPS/C15H40P74	4th PPS	Europe	C15	H40	Female	96	50	Clindamycin	550	mg	3	1650	33	Upper Respiratory Infections (URTI)	CAI	Empirical: awaiting culture	No Ventilation	2	2	0	0	0	0	0	0	0	0	0	0	0	0	0	0	0	0
4th PPS/C15H40P75	4th PPS	Europe	C15	H40	Female	96	50	Cefotaxime	2500	mg	3	7500	150	Central Nervous System (CNS) infections	CAI	Targeted	No Ventilation	2	2	0	0	0	0	0	0	0	0	0	0	0	0	0	0	0	0
4th PPS/C15H40P76	4th PPS	Europe	C15	H40	Female	132	25	Teicoplanin	375	mg	2	750	30	Sepsis	HAI	Empirical: pathogen determined	Invasive Ventilation	4	3	1	0	0	0	0	0	0	0	0	0	2	0	0	0	0	0
4th PPS/C15H40P77	4th PPS	Europe	C15	H40	Female	132	25	Meropenem	1000	mg	3	3000	120	Sepsis	HAI	Empirical: pathogen determined	Invasive Ventilation	4	3	1	0	0	0	0	0	0	0	0	0	2	0	0	0	0	0
4th PPS/C15H40P78	4th PPS	Europe	C15	H40	Female	24	15	Metronidazole	110	mg	4	440	29.333333333333332	Sepsis	HAI	Empirical: pathogen determined	Invasive Ventilation	5	4	2	0	0	0	1	0	0	0	0	0	1	0	0	0	0	0
4th PPS/C15H40P79	4th PPS	Europe	C15	H40	Female	24	15	Gentamicin	37.5	mg	2	75	5	Sepsis	HAI	Empirical: pathogen determined	Invasive Ventilation	5	4	2	0	0	0	1	0	0	0	0	0	1	0	0	0	0	0
4th PPS/C15H40P80	4th PPS	Europe	C15	H40	Female	24	15	Meropenem	625	mg	2	1250	83.33333333333333	Sepsis	HAI	Empirical: pathogen determined	Invasive Ventilation	5	4	2	0	0	0	1	0	0	0	0	0	1	0	0	0	0	0
4th PPS/C15H40P81	4th PPS	Europe	C15	H40	Female	24	15	Vancomycin	150	mg	2	300	20	Sepsis	HAI	Empirical: pathogen determined	Invasive Ventilation	5	4	2	0	0	0	1	0	0	0	0	0	1	0	0	0	0	0
4th PPS/C15H40P82	4th PPS	Europe	C15	H40	Female	60	31	Meropenem	1250	mg	3	3750	120.96774193548387	Sepsis	HAI	Targeted	Invasive Ventilation	4	3	1	0	0	0	0	0	0	0	0	0	0	1	0	0	0	0
4th PPS/C15H40P83	4th PPS	Europe	C15	H40	Female	60	31	Gentamicin	225	mg	1	225	7.258064516129032	Sepsis	HAI	Targeted	Invasive Ventilation	4	3	1	0	0	0	0	0	0	0	0	0	0	1	0	0	0	0
4th PPS/C15H40P84	4th PPS	Europe	C15	H40	Male	1	4.03000020980835	Meropenem	80	mg	3	240	59.5533467754865	Treatment for Surgical disease	HAI	Empirical: pathogen determined	No Ventilation	2	2	2	0	0	1	0	0	0	0	0	0	0	1	0	0	0	0
4th PPS/C15H40P85	4th PPS	Europe	C15	H40	Male	1	4.03000020980835	Vancomycin	40	mg	3	120	29.77667338774325	Treatment for Surgical disease	HAI	Empirical: pathogen determined	No Ventilation	2	2	2	0	0	1	0	0	0	0	0	0	0	1	0	0	0	0
4th PPS/C15H40P86	4th PPS	Europe	C15	H40	Female	5	2.940000057220459	Amikacin	90	mg	1	90	30.612244302160995	Sepsis	HAI	Empirical: pathogen determined	No Ventilation	4	3	1	0	0	0	0	0	0	0	0	0	1	0	0	0	0	0
4th PPS/C15H40P87	4th PPS	Europe	C15	H40	Female	5	2.940000057220459	Metronidazole	45	mg	3	135	45.9183664532415	GI tract infections	HAI	Empirical: pathogen determined	No Ventilation	4	3	1	0	0	0	0	0	0	0	0	0	1	0	0	0	0	0
4th PPS/C15H40P88	4th PPS	Europe	C15	H40	Female	5	2.940000057220459	Ciprofloxacin	62	mg	2	124	42.17686992742182	Sepsis	HAI	Empirical: pathogen determined	No Ventilation	4	3	1	0	0	0	0	0	0	0	0	0	1	0	0	0	0	0
4th PPS/C15H40P89	4th PPS	Europe	C15	H40	Male	2	5	Vancomycin	44	mg	4	176	35.2	Sepsis	HAI	Empirical: pathogen determined	Invasive Ventilation	2	2	1	0	0	0	0	0	0	0	1	0	0	0	0	0	0	0
4th PPS/C15H40P90	4th PPS	Europe	C15	H40	Male	2	5	Cefepime	132	mg	2	264	52.8	Sepsis	HAI	Empirical: pathogen determined	Invasive Ventilation	2	2	1	0	0	0	0	0	0	0	1	0	0	0	0	0	0	0
4th PPS/C15H40P91	4th PPS	Europe	C15	H40	Female	3	1.7300000190734863	Meropenem	28	mg	3	84	48.55491275947314	Bacterial LRTI	HAI	Empirical: awaiting culture	Invasive Ventilation	2	2	1	0	0	0	0	0	0	0	0	0	0	0	0	1	0	0
4th PPS/C15H40P92	4th PPS	Europe	C15	H40	Female	3	1.7300000190734863	Pip-taz	120	mg	3	360	208.09248325488488	Bacterial LRTI	HAI	Empirical: pathogen determined	Invasive Ventilation	2	2	1	0	0	0	0	0	0	0	0	0	0	0	0	1	0	0
4th PPS/C15H40P93	4th PPS	Europe	C15	H40	Female	13	10	Cefotaxime	500	mg	3	1500	150	Urinary Tract Infections (UTI)	CAI	Targeted	No Ventilation	1	1	1	0	0	0	0	0	0	0	0	0	0	0	0	0	1	0
4th PPS/C15H40P94	4th PPS	Europe	C15	H40	Male	132	26	Clindamycin	250	mg	4	1000	38.46153846153846	Bacterial LRTI	CAI	Empirical: awaiting culture	No Ventilation	2	2	1	0	0	0	0	0	0	0	0	0	2	0	0	0	0	0
4th PPS/C15H40P95	4th PPS	Europe	C15	H40	Male	132	26	Ceftriaxone	2600	mg	1	2600	100	Bacterial LRTI	CAI	Empirical: awaiting culture	No Ventilation	2	2	1	0	0	0	0	0	0	0	0	0	2	0	0	0	0	0
4th PPS/C15H40P96	4th PPS	Europe	C15	H40	Male	36	11	Ciprofloxacin	130	mg	3	390	35.45454545454545	Bacterial LRTI	HAI	Targeted	Non-Invasive Ventilation	2	2	1	0	0	0	0	0	0	0	0	0	0	0	0	0	0	1
4th PPS/C15H40P97	4th PPS	Europe	C15	H40	Female	1	3.200000047683716	Ampicillin	130	mg	4	520	162.49999757856133	Other	CAI	Empirical: awaiting culture	No Ventilation	1	1	0	0	0	0	0	0	0	0	0	0	0	0	0	0	0	0
4th PPS/C15H40P98	4th PPS	Europe	C15	H40	Female	60	20.5	Ceftriaxone	1000	mg	2	2000	97.5609756097561	Bacterial LRTI	CAI	Empirical: awaiting culture	No Ventilation	2	2	0	0	0	0	0	0	0	0	0	0	0	0	0	0	0	0
4th PPS/C15H40P99	4th PPS	Europe	C15	H40	Female	2	4.300000190734863	Amikacin	75	mg	1	75	17.44185969144867	Urinary Tract Infections (UTI)	CAI	Targeted	No Ventilation	1	1	0	0	0	0	0	0	0	0	0	0	0	0	0	0	0	0
4th PPS/C15H40P100	4th PPS	Europe	C15	H40	Female	36	15	Vancomycin	150	mg	4	600	40	Bacterial LRTI	CAI	Empirical: awaiting culture	No Ventilation	2	2	0	0	0	0	0	0	0	0	0	0	0	0	0	0	0	0
4th PPS/C15H40P101	4th PPS	Europe	C15	H40	Female	36	15	Ceftriaxone	750	mg	2	1500	100	Bacterial LRTI	CAI	Empirical: awaiting culture	No Ventilation	2	2	0	0	0	0	0	0	0	0	0	0	0	0	0	0	0	0
4th PPS/C15H40P102	4th PPS	Europe	C15	H40	Female	3	3.549999952316284	Ampicillin	100	mg	4	400	112.67605785149665	Viral LRTI	CAI	Empirical: awaiting culture	No Ventilation	2	2	0	0	0	0	0	0	0	0	0	0	0	0	0	0	0	0
4th PPS/C15H40P103	4th PPS	Europe	C15	H40	Male	24	9.899999618530273	Ceftazidime	500	mg	3	1500	151.51515735337836	CRBSI	HAI	Targeted	No Ventilation	2	1	0	0	0	0	0	0	0	0	0	0	0	0	0	0	0	0
Pilot PPS/C18H50P1	Pilot PPS	South-East Asia	C18	H50	Female	1	3.0999999046325684	Amikacin	21	mg	2	42	13.548387513572555	Treatment for Surgical disease	Unknown	Empirical: awaiting culture	No Ventilation	3	3
Pilot PPS/C18H50P2	Pilot PPS	South-East Asia	C18	H50	Female	1	3.0999999046325684	Co-amoxiclav	90	mg	3	270	87.09677687296643	Treatment for Surgical disease	Unknown	Empirical: awaiting culture	No Ventilation	3	3
Pilot PPS/C18H50P3	Pilot PPS	South-East Asia	C18	H50	Female	1	3.0999999046325684	Metronidazole	21	mg	3	63	20.322581270358832	Treatment for Surgical disease	Unknown	Empirical: awaiting culture	No Ventilation	3	3
Pilot PPS/C18H50P4	Pilot PPS	South-East Asia	C18	H50	Male	36	11.5	Amikacin	172.5	mg	1	172.5	15	Treatment for Surgical disease	Unknown	Empirical: no culture	Invasive Ventilation	2	2	1	0	0	1	0	0	0	0	0	0	0	0	0	0	0	0
Pilot PPS/C18H50P5	Pilot PPS	South-East Asia	C18	H50	Female	72	19	Amikacin	150	mg	2	300	15.789473684210526	GI tract infections	Unknown	Empirical: no culture	No Ventilation	2	2
Pilot PPS/C18H50P6	Pilot PPS	South-East Asia	C18	H50	Female	72	19	Cefotaxime	630	mg	3	1890	99.47368421052632	GI tract infections	Unknown	Empirical: no culture	No Ventilation	2	2
Pilot PPS/C18H50P7	Pilot PPS	South-East Asia	C18	H50	Male	108	16.799999237060547	Amikacin	125	mg	2	250	14.880953056742035	GI tract infections	Unknown	Empirical: awaiting culture	No Ventilation	3	3
Pilot PPS/C18H50P8	Pilot PPS	South-East Asia	C18	H50	Male	108	16.799999237060547	Pip-taz	1500	mg	3	4500	267.8571550213566	Febrile neutropenia/Fever	Unknown	Empirical: awaiting culture	No Ventilation	3	3
Pilot PPS/C18H50P9	Pilot PPS	South-East Asia	C18	H50	Male	12	6.699999809265137	Co-amoxiclav	50	mg	3	150	22.388060338833377	Upper Respiratory Infections (URTI)	Unknown	Empirical: no culture	No Ventilation	2	2	1	0	0	0	0	0	0	0	0	0	0	0	0	0	1	0
Pilot PPS/C18H50P10	Pilot PPS	South-East Asia	C18	H50	Male	12	6.699999809265137	Ceftazidime	115	mg	3	345	51.49253877931677	Upper Respiratory Infections (URTI)	Unknown	Empirical: no culture	No Ventilation	2	2	1	0	0	0	0	0	0	0	0	0	0	0	0	0	1	0
Pilot PPS/C18H50P11	Pilot PPS	South-East Asia	C18	H50	Male	12	11	Co-amoxiclav	300	mg	3	900	81.81818181818181	Upper Respiratory Infections (URTI)	CAI	Empirical: no culture	No Ventilation	1	1	1	0	0	0	0	0	0	0	0	0	0	0	1	0	0	0
Pilot PPS/C18H50P12	Pilot PPS	South-East Asia	C18	H50	Male	12	8.460000038146973	Co-amoxiclav	135	mg	3	405	47.872340209670824	Treatment for Surgical disease	Unknown	Empirical: no culture	No Ventilation	1	1
Pilot PPS/C18H50P13	Pilot PPS	South-East Asia	C18	H50	Male	120	12	Ceftriaxone	600	mg	2	1200	100	Febrile neutropenia/Fever	Unknown	Empirical: awaiting culture	No Ventilation	1	1
Pilot PPS/C18H54P1	Pilot PPS	South-East Asia	C18	H54	Male	14	8.899999618530273	Ceftriaxone	400	mg	2	800	89.88764430218147	Bacterial LRTI	CAI	Empirical: no culture	No Ventilation	1	1
Pilot PPS/C18H50P14	Pilot PPS	South-East Asia	C18	H50	Male	24	10	Ceftriaxone	500	mg	2	1000	100	Bacterial LRTI	Unknown	Empirical: awaiting culture	No Ventilation	1	1	1	0	0	0	0	0	0	0	0	0	0	0	1	0	0	0
Pilot PPS/C18H54P2	Pilot PPS	South-East Asia	C18	H54	Male	16	11	Ceftriaxone	500	mg	2	1000	90.9090909090909	Viral LRTI	CAI	Empirical: awaiting culture	No Ventilation	2	1
Pilot PPS/C18H50P15	Pilot PPS	South-East Asia	C18	H50	Male	12	9.199999809265137	Ceftriaxone	450	mg	2	900	97.82608898465715	Unknown	Unknown	Empirical: no culture	No Ventilation	1	1
Pilot PPS/C18H50P16	Pilot PPS	South-East Asia	C18	H50	Female	72	20	Ceftriaxone	1000	mg	2	2000	100	Febrile neutropenia/Fever	Unknown	Empirical: no culture	No Ventilation	1	1
Pilot PPS/C18H50P17	Pilot PPS	South-East Asia	C18	H50	Female	108	21	Ceftriaxone	1000	mg	2	2000	95.23809523809524	Febrile neutropenia/Fever	Unknown	Empirical: awaiting culture	No Ventilation	2	2
Pilot PPS/C18H50P18	Pilot PPS	South-East Asia	C18	H50	Female	10	7.199999809265137	Ceftriaxone	400	mg	2	800	111.11111405455044	Bacterial LRTI	Unknown	Empirical: awaiting culture	No Ventilation	1	1	1	0	0	0	0	0	0	0	0	0	0	0	1	0	0	0
Pilot PPS/C18H50P19	Pilot PPS	South-East Asia	C18	H50	Male	84	17	Ceftriaxone	850	mg	2	1700	100	Febrile neutropenia/Fever	Unknown	Empirical: awaiting culture	No Ventilation	1	1	3	0	0	0	1	0	0	0	0	0	0	0	2	0	0	0
Pilot PPS/C18H50P20	Pilot PPS	South-East Asia	C18	H50	Male	12	6.800000190734863	Ceftriaxone	350	mg	2	700	102.94117358316608	Febrile neutropenia/Fever	Unknown	Empirical: awaiting culture	No Ventilation	1	1
Pilot PPS/C18H50P21	Pilot PPS	South-East Asia	C18	H50	Female	4	4.300000190734863	Meropenem	180	mg	3	540	125.58138977843042	CRBSI	HAI	Empirical: pathogen determined	No Ventilation	1	1	1	0	0	1	0	0	0	0	0	0	0	0	0	0	0	0
Pilot PPS/C18H50P22	Pilot PPS	South-East Asia	C18	H50	Female	1	1.9299999475479126	Meropenem	80	mg	4	320	165.80311331436238	Sepsis	Unknown	Targeted	Invasive Ventilation	3	2	1	0	0	1	0	0	0	0	0	0	0	0	0	0	0	0
Pilot PPS/C18H50P23	Pilot PPS	South-East Asia	C18	H50	Male	24	8.199999809265137	Meropenem	160	mg	3	480	58.53658672743511	Urinary Tract Infections (UTI)	Unknown	Targeted	No Ventilation	5	4	1	0	0	0	0	0	0	0	0	0	0	0	1	0	0	0
Pilot PPS/C18H50P24	Pilot PPS	South-East Asia	C18	H50	Male	2	4.079999923706055	Metronidazole	30	mg	3	90	22.058823941900663	Treatment for Surgical disease	Unknown	Empirical: no culture	No Ventilation	3	3
Pilot PPS/C18H50P25	Pilot PPS	South-East Asia	C18	H50	Male	48	14	Pip-taz	1000	mg	3	3000	214.28571428571428	Febrile neutropenia/Fever	Unknown	Empirical: awaiting culture	No Ventilation	1	1	1	0	0	0	0	0	0	0	0	0	0	0	0	0	1	0
Pilot PPS/C18H50P26	Pilot PPS	South-East Asia	C18	H50	Female	6	5.159999847412109	Pip-taz	410	mg	3	1230	238.37210007222788	CRBSI	Unknown	Empirical: pathogen determined	Invasive Ventilation	2	2	1	0	0	1	0	0	0	0	0	0	0	0	0	0	0	0
Pilot PPS/C18H50P27	Pilot PPS	South-East Asia	C18	H50	Male	72	18	Vancomycin	360	mg	4	1440	80	Treatment for Surgical disease	Unknown	Empirical: no culture	No Ventilation	1	1
1st PPS/C18H51P1	1st PPS	South-East Asia	C18	H51	Male	48	13	Ceftriaxone	50	mg	2	100	7.6923076923076925	Bacterial LRTI	CAI	Empirical: awaiting culture	No Ventilation	1	1	0	0	0	0	0	0	0	0	0	0	0	0	0	0	0	0
1st PPS/C18H51P2	1st PPS	South-East Asia	C18	H51	Male	36	13	Ceftriaxone	50	mg	2	100	7.6923076923076925	Bacterial LRTI	CAI	Empirical: awaiting culture	No Ventilation	1	1	0	0	0	0	0	0	0	0	0	0	0	0	0	0	0	0
1st PPS/C18H51P3	1st PPS	South-East Asia	C18	H51	Female	2	2.799999952316284	Meropenem	20	mg	3	60	21.42857179349783	Bacterial LRTI	CAI	Empirical: pathogen determined	Invasive Ventilation	2	1	1	0	0	1	0	0	0	0	0	0	0	0	0	0	0	0
1st PPS/C18H51P4	1st PPS	South-East Asia	C18	H51	Male	24	10	Ceftriaxone	50	mg	2	100	10	Bacterial LRTI	CAI	Empirical: awaiting culture	No Ventilation	2	1	0	0	0	0	0	0	0	0	0	0	0	0	0	0	0	0
1st PPS/C18H51P5	1st PPS	South-East Asia	C18	H51	Female	9	6	Ceftriaxone	50	mg	2	100	16.666666666666668	Central Nervous System (CNS) infections	CAI	Empirical: awaiting culture	No Ventilation	1	1	0	0	0	0	0	0	0	0	0	0	0	0	0	0	0	0
1st PPS/C18H50P28	1st PPS	South-East Asia	C18	H50	Male	1	1.3700000047683716	Meropenem	62	mg	3	186	135.76642288512062	Urinary Tract Infections (UTI)	Unknown	Targeted	No Ventilation	3	3	2	0	0	0	0	1	0	0	0	0	0	0	1	0	0	0
1st PPS/C18H50P29	1st PPS	South-East Asia	C18	H50	Male	1	1.3700000047683716	Amikacin	23	mg	1	23	16.7883211094504	Urinary Tract Infections (UTI)	Unknown	Targeted	No Ventilation	3	3	2	0	0	0	0	1	0	0	0	0	0	0	1	0	0	0
1st PPS/C18H50P30	1st PPS	South-East Asia	C18	H50	Male	24	7.400000095367432	Pip-taz	1125	mg	3	3375	456.08107520334045	Urinary Tract Infections (UTI)	CAI	Targeted	No Ventilation	1	1	1	0	0	0	0	0	0	0	0	0	0	0	0	0	1	0
1st PPS/C18H50P31	1st PPS	South-East Asia	C18	H50	Male	60	16.5	Cefotaxime	570	mg	3	1710	103.63636363636364	Treatment for Surgical disease	Unknown	Empirical: awaiting culture	No Ventilation	3	3	1	0	0	0	0	0	0	0	0	0	0	0	0	0	1	0
1st PPS/C18H50P32	1st PPS	South-East Asia	C18	H50	Male	60	16.5	Metronidazole	130	mg	3	390	23.636363636363637	Treatment for Surgical disease	Unknown	Empirical: awaiting culture	No Ventilation	3	3	1	0	0	0	0	0	0	0	0	0	0	0	0	0	1	0
1st PPS/C18H50P33	1st PPS	South-East Asia	C18	H50	Male	60	16.5	Pip-taz	1125	mg	4	4500	272.72727272727275	Treatment for Surgical disease	Unknown	Empirical: awaiting culture	No Ventilation	3	3	1	0	0	0	0	0	0	0	0	0	0	0	0	0	1	0
1st PPS/C18H50P34	1st PPS	South-East Asia	C18	H50	Female	24	11.899999618530273	Cefotaxime	400	mg	3	1200	100.8403393670199	Treatment for Surgical disease	Unknown	Empirical: awaiting culture	No Ventilation	2	2	1	0	0	0	0	0	0	1	0	0	0	0	0	0	0	0
1st PPS/C18H50P35	1st PPS	South-East Asia	C18	H50	Female	24	11.899999618530273	Metronidazole	90	mg	3	270	22.689076357579474	Treatment for Surgical disease	Unknown	Empirical: awaiting culture	No Ventilation	2	2	1	0	0	0	0	0	0	1	0	0	0	0	0	0	0	0
1st PPS/C18H50P36	1st PPS	South-East Asia	C18	H50	Male	11	7.199999809265137	Cefotaxime	240	mg	3	720	100.00000264909539	Treatment for Surgical disease	Unknown	Empirical: awaiting culture	No Ventilation	2	2	1	0	0	0	0	0	0	0	0	0	0	0	0	0	1	0
1st PPS/C18H50P37	1st PPS	South-East Asia	C18	H50	Female	120	41.5	Cefotaxime	1000	mg	3	3000	72.28915662650603	Urinary Tract Infections (UTI)	Unknown	Empirical: awaiting culture	No Ventilation	1	1	1	0	0	0	0	0	0	0	0	0	0	0	1	0	0	0
1st PPS/C18H50P38	1st PPS	South-East Asia	C18	H50	Male	5	5.369999885559082	Meropenem	200	mg	3	600	111.73184595655401	Skin/Soft Tissue Infections (SSTI)	Unknown	Empirical: awaiting culture	No Ventilation	2	2	1	0	0	0	0	0	0	0	0	0	0	0	1	0	0	0
1st PPS/C18H50P39	1st PPS	South-East Asia	C18	H50	Female	12	6.599999904632568	Meropenem	260	mg	4	1040	157.57575985266598	Sepsis	HAI	Empirical: awaiting culture	Invasive Ventilation	2	1	1	0	0	1	0	0	0	0	0	0	0	0	0	0	0	0
1st PPS/C18H50P40	1st PPS	South-East Asia	C18	H50	Male	1	3.9000000953674316	Meropenem	160	mg	4	640	164.1025600897334	Sepsis	HAI	Empirical: awaiting culture	Non-Invasive Ventilation	1	1	1	0	0	1	0	0	0	0	0	0	0	0	0	0	0	0
1st PPS/C18H50P41	1st PPS	South-East Asia	C18	H50	Male	1	0.9100000262260437	Pip-taz	75	mg	3	225	247.25274012696576	Sepsis	HAI	Targeted	Non-Invasive Ventilation	2	2	1	0	0	0	0	0	0	0	0	0	0	0	0	1	0	0
1st PPS/C18H50P42	1st PPS	South-East Asia	C18	H50	Male	1	2.5999999046325684	Amikacin	53	mg	1	53	20.384616132318648	Sepsis	HAI	Empirical: awaiting culture	No Ventilation	3	2	1	0	0	0	0	0	0	0	0	0	0	0	1	0	0	0
1st PPS/C18H50P43	1st PPS	South-East Asia	C18	H50	Male	1	2.5999999046325684	Meropenem	140	mg	3	420	161.5384674636572	Sepsis	HAI	Empirical: awaiting culture	No Ventilation	3	2	1	0	0	0	0	0	0	0	0	0	0	0	1	0	0	0
1st PPS/C18H50P44	1st PPS	South-East Asia	C18	H50	Male	120	26	Meropenem	520	mg	3	1560	60	Other	Unknown	Empirical: awaiting culture	No Ventilation	2	2	1	0	0	0	0	0	0	1	0	0	0	0	0	0	0	0
1st PPS/C18H50P45	1st PPS	South-East Asia	C18	H50	Male	10	6.730000019073486	Ceftriaxone	335	mg	2	670	99.55423448754141	Bacterial LRTI	Unknown	Empirical: awaiting culture	No Ventilation	1	1	1	0	0	0	0	0	0	0	0	0	0	0	0	0	0	1
1st PPS/C18H50P46	1st PPS	South-East Asia	C18	H50	Male	48	13	Ceftriaxone	650	mg	2	1300	100	Bacterial LRTI	Unknown	Empirical: pathogen determined	No Ventilation	1	1	1	0	0	0	0	0	0	0	0	0	0	0	0	0	0	1
1st PPS/C18H50P47	1st PPS	South-East Asia	C18	H50	Male	96	16.200000762939453	Amikacin	120	mg	2	240	14.81481411711073	Treatment for Surgical disease	Unknown	Empirical: awaiting culture	No Ventilation	2	2	1	0	0	0	0	1	0	0	0	0	0	0	0	0	0	0
1st PPS/C18H50P48	1st PPS	South-East Asia	C18	H50	Male	36	10.5	Co-amoxiclav	300	mg	3	900	85.71428571428571	Bacterial LRTI	Unknown	Empirical: awaiting culture	No Ventilation	1	1	1	0	0	0	0	0	0	0	0	0	0	0	0	0	0	1
1st PPS/C18H50P49	1st PPS	South-East Asia	C18	H50	Male	36	7.800000190734863	Metronidazole	50	mg	3	150	19.230768760515634	Treatment for Surgical disease	Unknown	Empirical: awaiting culture	No Ventilation	1	1	1	0	0	0	0	1	0	0	0	0	0	0	0	0	0	0
1st PPS/C18H50P50	1st PPS	South-East Asia	C18	H50	Female	9	9	Ceftriaxone	500	mg	2	1000	111.11111111111111	Urinary Tract Infections (UTI)	Unknown	Empirical: awaiting culture	No Ventilation	1	1	1	0	0	0	0	0	0	0	0	0	0	0	0	0	1	0
1st PPS/C18H50P51	1st PPS	South-East Asia	C18	H50	Male	24	14	Co-amoxiclav	420	mg	3	1260	90	Skin/Soft Tissue Infections (SSTI)	Unknown	Empirical: awaiting culture	No Ventilation	2	2	1	0	0	0	0	0	0	0	0	0	0	0	1	0	0	0
1st PPS/C18H53P1	1st PPS	South-East Asia	C18	H53	Male	36	14	Ceftriaxone	500	mg	2	1000	71.42857142857143	Upper Respiratory Infections (URTI)	CAI	Empirical: pathogen determined	No Ventilation	1	1	0	0	0	0	0	0	0	0	0	0	0	0	0	0	0	0
2nd PPS/C18H55P1	2nd PPS	South-East Asia	C18	H55	Male	4	5.5	Ceftriaxone	275	mg	2	550	100	Sepsis	CAI	Empirical: pathogen determined	No Ventilation	2	2	0	0	0	0	0	0	0	0	0	0	0	0	0	0	0	0
2nd PPS/C18H55P2	2nd PPS	South-East Asia	C18	H55	Male	4	5.5	Amikacin	82.5	mg	1	82.5	15	Sepsis	CAI	Empirical: pathogen determined	No Ventilation	2	2	0	0	0	0	0	0	0	0	0	0	0	0	0	0	0	0
2nd PPS/C18H55P3	2nd PPS	South-East Asia	C18	H55	Female	120	25	Ceftriaxone	1000	mg	2	2000	80	Sepsis	CAI	Targeted	No Ventilation	1	1	1	0	0	0	0	0	1	0	0	0	0	0	0	0	0	0
2nd PPS/C18H55P4	2nd PPS	South-East Asia	C18	H55	Female	5	6	Ceftriaxone	300	mg	2	600	100	Sepsis	CAI	Empirical: pathogen determined	No Ventilation	1	1	0	0	0	0	0	0	0	0	0	0	0	0	0	0	0	0
2nd PPS/C18H55P5	2nd PPS	South-East Asia	C18	H55	Male	2	5.199999809265137	Ceftriaxone	260	mg	2	520	100.00000366797828	Sepsis	CAI	Empirical: pathogen determined	No Ventilation	2	2	0	0	0	0	0	0	0	0	0	0	0	0	0	0	0	0
2nd PPS/C18H55P6	2nd PPS	South-East Asia	C18	H55	Male	2	5.199999809265137	Amikacin	78	mg	1	78	15.000000550196742	Sepsis	CAI	Empirical: pathogen determined	No Ventilation	2	2	0	0	0	0	0	0	0	0	0	0	0	0	0	0	0	0
2nd PPS/C18H55P7	2nd PPS	South-East Asia	C18	H55	Female	7	4.599999904632568	Gentamicin	18.399999618530273	mg	1	18.399999618530273	4	Sepsis	CAI	Empirical: pathogen determined	No Ventilation	2	2	0	0	0	0	0	0	0	0	0	0	0	0	0	0	0	0
2nd PPS/C18H55P8	2nd PPS	South-East Asia	C18	H55	Female	7	4.599999904632568	Ceftriaxone	230	mg	2	460	100.00000207320508	Sepsis	CAI	Empirical: pathogen determined	No Ventilation	2	2	0	0	0	0	0	0	0	0	0	0	0	0	0	0	0	0
2nd PPS/C18H55P9	2nd PPS	South-East Asia	C18	H55	Male	120	27	Ceftriaxone	1000	mg	2	2000	74.07407407407408	Sepsis	CAI	Empirical: pathogen determined	No Ventilation	1	1	0	0	0	0	0	0	0	0	0	0	0	0	0	0	0	0
2nd PPS/C18H55P10	2nd PPS	South-East Asia	C18	H55	Female	7	5.199999809265137	Ceftriaxone	260	mg	2	520	100.00000366797828	GI tract infections	CAI	Empirical: pathogen determined	No Ventilation	1	1	0	0	0	0	0	0	0	0	0	0	0	0	0	0	0	0
2nd PPS/C18H55P11	2nd PPS	South-East Asia	C18	H55	Female	12	7	Ceftriaxone	350	mg	2	700	100	Sepsis	CAI	Unknown	No Ventilation	2	2	0	0	0	0	0	0	0	0	0	0	0	0	0	0	0	0
2nd PPS/C18H55P12	2nd PPS	South-East Asia	C18	H55	Female	12	7	Gentamicin	17.5	mg	1	17.5	2.5	Sepsis	CAI	Empirical: pathogen determined	No Ventilation	2	2	0	0	0	0	0	0	0	0	0	0	0	0	0	0	0	0
2nd PPS/C18H55P13	2nd PPS	South-East Asia	C18	H55	Male	12	7	Ceftriaxone	350	mg	2	700	100	Central Nervous System (CNS) infections	CAI	Empirical: pathogen determined	No Ventilation	1	1	0	0	0	0	0	0	0	0	0	0	0	0	0	0	0	0
2nd PPS/C18H51P6	2nd PPS	South-East Asia	C18	H51	Female	60	15	Co-amoxiclav	500	mg	3	1500	100	Skin/Soft Tissue Infections (SSTI)	CAI	Empirical: awaiting culture	No Ventilation	1	1	0	0	0	0	0	0	0	0	0	0	0	0	0	0	0	0
2nd PPS/C18H51P7	2nd PPS	South-East Asia	C18	H51	Male	24	12	Ceftriaxone	600	mg	2	1200	100	Sepsis	CAI	Empirical: awaiting culture	No Ventilation	1	1	0	0	0	0	0	0	0	0	0	0	0	0	0	0	0	0
2nd PPS/C18H51P8	2nd PPS	South-East Asia	C18	H51	Male	24	11.5	Amikacin	75	mg	2	150	13.043478260869565	GI tract infections	CAI	Empirical: awaiting culture	No Ventilation	1	1	0	0	0	0	0	0	0	0	0	0	0	0	0	0	0	0
2nd PPS/C18H51P9	2nd PPS	South-East Asia	C18	H51	Female	48	10	Ceftriaxone	500	mg	2	1000	100	Sepsis	CAI	Empirical: awaiting culture	No Ventilation	1	1	1	0	0	0	0	0	0	0	0	0	0	0	0	0	0	1
2nd PPS/C18H51P10	2nd PPS	South-East Asia	C18	H51	Male	1	2.299999952316284	Meropenem	100	mg	3	300	130.4347853128762	Bacterial LRTI	CAI	Empirical: awaiting culture	No Ventilation	2	2	1	0	0	0	0	1	0	0	0	0	0	0	0	0	0	0
2nd PPS/C18H51P11	2nd PPS	South-East Asia	C18	H51	Male	24	8	Ceftriaxone	400	mg	2	800	100	Central Nervous System (CNS) infections	CAI	Empirical: awaiting culture	No Ventilation	1	1	1	0	0	0	0	0	0	0	0	0	1	0	0	0	0	0
2nd PPS/C18H56P1	2nd PPS	South-East Asia	C18	H56	Male	2	4.300000190734863	Meropenem	85	mg	3	255	59.30232295092547	Bacterial LRTI	CAI	Unknown	No Ventilation	3	2	0	0	0	0	0	0	0	0	0	0	0	0	0	0	0	0
2nd PPS/C18H56P2	2nd PPS	South-East Asia	C18	H56	Male	4	2.0999999046325684	Cefotaxime	100	mg	2	200	95.23809956314902	Bacterial LRTI	CAI	Empirical: pathogen determined	Invasive Ventilation	2	2	2	0	0	0	0	0	0	0	0	0	0	0	0	1	0	1
2nd PPS/C18H50P52	2nd PPS	South-East Asia	C18	H50	Female	2	3.5999999046325684	Cefotaxime	130	mg	3	390	108.33333620318668	Sepsis	Unknown	Targeted	No Ventilation	3	3	1	0	0	0	0	0	0	0	0	0	0	0	0	0	1	0
2nd PPS/C18H50P53	2nd PPS	South-East Asia	C18	H50	Female	2	3.5999999046325684	Amikacin	30	mg	2	60	16.666667108182565	Sepsis	Unknown	Targeted	No Ventilation	3	3	1	0	0	0	0	0	0	0	0	0	0	0	0	0	1	0
2nd PPS/C18H50P54	2nd PPS	South-East Asia	C18	H50	Female	2	3.5999999046325684	Metronidazole	30	mg	3	90	25.000000662273848	Sepsis	Unknown	Targeted	No Ventilation	3	3	1	0	0	0	0	0	0	0	0	0	0	0	0	0	1	0
2nd PPS/C18H50P55	2nd PPS	South-East Asia	C18	H50	Male	9	8	Cefotaxime	270	mg	3	810	101.25	Treatment for Surgical disease	Unknown	Empirical: awaiting culture	No Ventilation	2	2	1	0	0	0	0	1	0	0	0	0	0	0	0	0	0	0
2nd PPS/C18H50P56	2nd PPS	South-East Asia	C18	H50	Female	5	4.619999885559082	Meropenem	95	mg	3	285	61.68831321637818	Treatment for Surgical disease	HAI	Targeted	No Ventilation	1	1	1	0	0	0	0	0	0	0	0	0	0	1	0	0	0	0
2nd PPS/C18H50P57	2nd PPS	South-East Asia	C18	H50	Female	108	21	Meropenem	800	mg	3	2400	114.28571428571429	Pyrexia of Unknown Origin (PUO)	CAI	Targeted	No Ventilation	1	1	1	0	0	0	0	0	0	0	0	0	0	0	1	0	0	0
2nd PPS/C18H50P58	2nd PPS	South-East Asia	C18	H50	Male	60	12.5	Ceftriaxone	650	mg	2	1300	104	Pyrexia of Unknown Origin (PUO)	Unknown	Empirical: awaiting culture	No Ventilation	1	1	1	0	0	0	0	0	0	0	0	0	1	0	0	0	0	0
2nd PPS/C18H50P59	2nd PPS	South-East Asia	C18	H50	Female	120	33	Amikacin	250	mg	2	500	15.151515151515152	Treatment for Surgical disease	Unknown	Empirical: awaiting culture	No Ventilation	3	3	1	0	0	0	0	0	0	0	0	0	0	1	0	0	0	0
2nd PPS/C18H50P60	2nd PPS	South-East Asia	C18	H50	Female	120	33	Metronidazole	250	mg	3	750	22.727272727272727	Treatment for Surgical disease	Unknown	Empirical: awaiting culture	No Ventilation	3	3	1	0	0	0	0	0	0	0	0	0	0	1	0	0	0	0
2nd PPS/C18H50P61	2nd PPS	South-East Asia	C18	H50	Female	120	33	Co-amoxiclav	350	mg	3	1050	31.818181818181817	Treatment for Surgical disease	Unknown	Empirical: awaiting culture	No Ventilation	3	3	1	0	0	0	0	0	0	0	0	0	0	1	0	0	0	0
2nd PPS/C18H50P62	2nd PPS	South-East Asia	C18	H50	Female	72	16	Ceftriaxone	800	mg	2	1600	100	Treatment for Surgical disease	Unknown	Empirical: awaiting culture	No Ventilation	2	2	1	0	0	0	0	0	0	0	0	0	0	0	0	0	0	1
2nd PPS/C18H50P63	2nd PPS	South-East Asia	C18	H50	Female	72	16	Co-amoxiclav	480	mg	3	1440	90	Treatment for Surgical disease	Unknown	Empirical: awaiting culture	No Ventilation	2	2	1	0	0	0	0	0	0	0	0	0	0	0	0	0	0	1
2nd PPS/C18H50P64	2nd PPS	South-East Asia	C18	H50	Male	60	18.399999618530273	Metronidazole	135	mg	3	405	22.010870021547856	Treatment for Surgical disease	Unknown	Empirical: awaiting culture	No Ventilation	3	3	1	0	0	0	0	0	0	0	0	0	0	1	0	0	0	0
2nd PPS/C18H50P65	2nd PPS	South-East Asia	C18	H50	Male	60	18.399999618530273	Amikacin	135	mg	2	270	14.673913347698571	Treatment for Surgical disease	Unknown	Empirical: awaiting culture	No Ventilation	3	3	1	0	0	0	0	0	0	0	0	0	0	1	0	0	0	0
2nd PPS/C18H50P66	2nd PPS	South-East Asia	C18	H50	Male	60	18.399999618530273	Cefotaxime	590	mg	3	1770	96.1956541682462	Treatment for Surgical disease	Unknown	Empirical: awaiting culture	No Ventilation	3	3	1	0	0	0	0	0	0	0	0	0	0	1	0	0	0	0
2nd PPS/C18H50P67	2nd PPS	South-East Asia	C18	H50	Female	4	5.139999866485596	Metronidazole	40	mg	3	120	23.346304108378966	Treatment for Surgical disease	Unknown	Empirical: awaiting culture	No Ventilation	3	3	1	0	0	0	0	0	0	0	0	0	0	1	0	0	0	0
2nd PPS/C18H50P68	2nd PPS	South-East Asia	C18	H50	Female	4	5.139999866485596	Co-amoxiclav	160	mg	3	480	93.38521643351586	Treatment for Surgical disease	Unknown	Empirical: awaiting culture	No Ventilation	3	3	1	0	0	0	0	0	0	0	0	0	0	1	0	0	0	0
2nd PPS/C18H50P69	2nd PPS	South-East Asia	C18	H50	Female	4	5.139999866485596	Amikacin	40	mg	2	80	15.564202738919311	Treatment for Surgical disease	Unknown	Empirical: awaiting culture	No Ventilation	3	3	1	0	0	0	0	0	0	0	0	0	0	1	0	0	0	0
2nd PPS/C18H50P70	2nd PPS	South-East Asia	C18	H50	Male	24	15.5	Pip-taz	1125	mg	3	3375	217.74193548387098	Urinary Tract Infections (UTI)	CAI	Targeted	No Ventilation	1	1	1	0	0	0	0	0	0	0	0	0	0	0	1	0	0	0
2nd PPS/C18H50P71	2nd PPS	South-East Asia	C18	H50	Male	3	4.889999866485596	Metronidazole	37	mg	3	111	22.699387122841543	Treatment for Surgical disease	HAI	Empirical: no culture	Invasive Ventilation	2	2	1	0	0	1	0	0	0	0	0	0	0	0	0	0	0	0
2nd PPS/C18H50P72	2nd PPS	South-East Asia	C18	H50	Male	1	3.299999952316284	Meropenem	130	mg	3	390	118.1818198894995	Sepsis	HAI	Empirical: awaiting culture	Invasive Ventilation	2	1	1	0	0	1	0	0	0	0	0	0	0	0	0	0	0	0
2nd PPS/C18H50P73	2nd PPS	South-East Asia	C18	H50	Female	72	20	Ceftriaxone	1000	mg	2	2000	100	Central Nervous System (CNS) infections	Unknown	Empirical: awaiting culture	No Ventilation	2	2	1	0	0	0	0	0	0	0	0	0	1	0	0	0	0	0
2nd PPS/C18H50P74	2nd PPS	South-East Asia	C18	H50	Male	4	5.199999809265137	Meropenem	208	mg	4	832	160.00000586876524	Sepsis	CAI	Targeted	No Ventilation	1	1	1	0	0	1	0	0	0	0	0	0	0	0	0	0	0	0
2nd PPS/C18H50P75	2nd PPS	South-East Asia	C18	H50	Male	2	5.699999809265137	Vancomycin	100	mg	4	400	70.17544094471985	Other	Unknown	Empirical: pathogen determined	No Ventilation	2	2	1	0	0	0	0	0	1	0	0	0	0	0	0	0	0	0
2nd PPS/C18H50P76	2nd PPS	South-East Asia	C18	H50	Male	2	5.699999809265137	Ceftriaxone	290	mg	2	580	101.75438936984378	Other	Unknown	Empirical: pathogen determined	No Ventilation	2	2	1	0	0	0	0	0	1	0	0	0	0	0	0	0	0	0
2nd PPS/C18H50P77	2nd PPS	South-East Asia	C18	H50	Male	11	8.600000381469727	Ceftriaxone	450	mg	2	900	104.65115814869202	Urinary Tract Infections (UTI)	CAI	Empirical: pathogen determined	No Ventilation	1	1	1	0	0	0	0	0	0	0	0	0	0	0	0	0	1	0
2nd PPS/C18H50P78	2nd PPS	South-East Asia	C18	H50	Male	96	24	Ceftriaxone	1200	mg	2	2400	100	Other	Unknown	Empirical: pathogen determined	No Ventilation	1	1	0	0	0	0	0	0	0	0	0	0	0	0	0	0	0	0
2nd PPS/C18H50P79	2nd PPS	South-East Asia	C18	H50	Male	24	10.5	Metronidazole	500	mg	1	500	47.61904761904762	Treatment for Surgical disease	Unknown	Empirical: awaiting culture	No Ventilation	3	3	1	0	0	0	0	0	0	0	0	0	0	1	0	0	0	0
2nd PPS/C18H50P80	2nd PPS	South-East Asia	C18	H50	Male	24	10.5	Cefotaxime	1000	mg	3	3000	285.7142857142857	Treatment for Surgical disease	Unknown	Empirical: awaiting culture	No Ventilation	3	3	1	0	0	0	0	0	0	0	0	0	0	1	0	0	0	0
2nd PPS/C18H50P81	2nd PPS	South-East Asia	C18	H50	Male	24	10.5	Amikacin	100	mg	1	100	9.523809523809524	Treatment for Surgical disease	Unknown	Empirical: awaiting culture	No Ventilation	3	3	1	0	0	0	0	0	0	0	0	0	0	1	0	0	0	0
2nd PPS/C18H50P82	2nd PPS	South-East Asia	C18	H50	Male	48	15	Amikacin	250	mg	2	500	33.333333333333336	Other	Unknown	Targeted	No Ventilation	2	2	1	0	0	0	0	1	0	0	0	0	0	0	0	0	0	0
2nd PPS/C18H50P83	2nd PPS	South-East Asia	C18	H50	Male	48	15	Cefotaxime	1000	mg	3	3000	200	Other	Unknown	Targeted	No Ventilation	2	2	1	0	0	0	0	1	0	0	0	0	0	0	0	0	0	0
2nd PPS/C18H50P84	2nd PPS	South-East Asia	C18	H50	Female	1	4.159999847412109	Co-amoxiclav	120	mg	2	240	57.692309808449004	Treatment for Surgical disease	HAI	Empirical: awaiting culture	No Ventilation	1	1	1	0	0	0	0	1	0	0	0	0	0	0	0	0	0	0
2nd PPS/C18H50P85	2nd PPS	South-East Asia	C18	H50	Male	24	10	Metronidazole	500	mg	1	500	50	Other	Unknown	Empirical: awaiting culture	No Ventilation	3	3	1	0	0	0	0	1	0	0	0	0	0	0	0	0	0	0
2nd PPS/C18H50P86	2nd PPS	South-East Asia	C18	H50	Male	24	10	Cefotaxime	1000	mg	1	1000	100	Other	Unknown	Empirical: awaiting culture	No Ventilation	3	3	1	0	0	0	0	1	0	0	0	0	0	0	0	0	0	0
2nd PPS/C18H50P87	2nd PPS	South-East Asia	C18	H50	Male	24	10	Amikacin	100	mg	1	100	10	Other	Unknown	Empirical: awaiting culture	No Ventilation	3	3	1	0	0	0	0	1	0	0	0	0	0	0	0	0	0	0
2nd PPS/C18H50P88	2nd PPS	South-East Asia	C18	H50	Female	24	11	Co-amoxiclav	300	mg	3	900	81.81818181818181	Pyrexia of Unknown Origin (PUO)	CAI	Empirical: awaiting culture	No Ventilation	1	1	1	0	0	0	0	0	0	0	0	0	0	0	1	0	0	0
2nd PPS/C18H52P1	2nd PPS	South-East Asia	C18	H52	Female	2	3.700000047683716	Ceftriaxone	75	mg	2	150	40.54054001807471	Bacterial LRTI	CAI	Empirical: awaiting culture	No Ventilation	1	1	0	0	0	0	0	0	0	0	0	0	0	0	0	0	0	0
2nd PPS/C18H52P2	2nd PPS	South-East Asia	C18	H52	Male	3	5.199999809265137	Co-amoxiclav	33	mg	3	99	19.03846223678817	Bacterial LRTI	CAI	Empirical: awaiting culture	No Ventilation	1	1	0	0	0	0	0	0	0	0	0	0	0	0	0	0	0	0
2nd PPS/C18H52P3	2nd PPS	South-East Asia	C18	H52	Male	36	13	Ceftriaxone	50	mg	2	100	7.6923076923076925	Bacterial LRTI	CAI	Empirical: awaiting culture	No Ventilation	1	1	0	0	0	0	0	0	0	0	0	0	0	0	0	0	0	0
2nd PPS/C18H52P4	2nd PPS	South-East Asia	C18	H52	Male	60	12	Co-amoxiclav	100	mg	3	300	25	Skin/Soft Tissue Infections (SSTI)	CAI	Empirical: awaiting culture	No Ventilation	2	2	0	0	0	0	0	0	0	0	0	0	0	0	0	0	0	0
2nd PPS/C18H52P5	2nd PPS	South-East Asia	C18	H52	Male	21	9.5	Co-amoxiclav	100	mg	3	300	31.57894736842105	Skin/Soft Tissue Infections (SSTI)	CAI	Empirical: awaiting culture	No Ventilation	1	1	0	0	0	0	0	0	0	0	0	0	0	0	0	0	0	0
2nd PPS/C18H52P6	2nd PPS	South-East Asia	C18	H52	Male	9	6.900000095367432	Co-amoxiclav	100	mg	3	300	43.47826026863623	Bacterial LRTI	CAI	Empirical: awaiting culture	No Ventilation	1	1	1	0	0	0	0	0	1	0	0	0	0	0	0	0	0	0
2nd PPS/C18H52P7	2nd PPS	South-East Asia	C18	H52	Male	36	8	Cefotaxime	50	mg	3	150	18.75	GI tract infections	CAI	Empirical: awaiting culture	No Ventilation	3	3	2	0	0	0	0	0	0	0	1	0	0	0	1	0	0	0
2nd PPS/C18H52P8	2nd PPS	South-East Asia	C18	H52	Male	7	6.900000095367432	Ceftriaxone	50	mg	2	100	14.492753422878744	Bacterial LRTI	CAI	Empirical: awaiting culture	No Ventilation	1	1	0	0	0	0	0	0	0	0	0	0	0	0	0	0	0	0
2nd PPS/C18H52P9	2nd PPS	South-East Asia	C18	H52	Male	2	3.140000104904175	Meropenem	20	mg	3	60	19.108279616389076	Central Nervous System (CNS) infections	CAI	Unknown	No Ventilation	3	2	1	0	0	0	0	0	0	0	0	0	0	0	0	1	0	0
2nd PPS/C18H52P10	2nd PPS	South-East Asia	C18	H52	Male	2	4.400000095367432	Ceftriaxone	50	mg	2	100	22.72727223467237	Bacterial LRTI	CAI	Empirical: awaiting culture	Non-Invasive Ventilation	1	1	1	0	0	1	0	0	0	0	0	0	0	0	0	0	0	0
2nd PPS/C18H52P11	2nd PPS	South-East Asia	C18	H52	Male	36	9	Ceftriaxone	50	mg	2	100	11.11111111111111	Bacterial LRTI	CAI	Empirical: awaiting culture	No Ventilation	1	1	0	0	0	0	0	0	0	0	0	0	0	0	0	0	0	0
2nd PPS/C18H52P12	2nd PPS	South-East Asia	C18	H52	Male	48	11	Co-amoxiclav	100	mg	3	300	27.272727272727273	Bacterial LRTI	CAI	Empirical: awaiting culture	No Ventilation	1	1	1	0	0	1	0	0	0	0	0	0	0	0	0	0	0	0
2nd PPS/C18H52P13	2nd PPS	South-East Asia	C18	H52	Female	6	5.300000190734863	Co-amoxiclav	100	mg	3	300	56.60377154786554	Bacterial LRTI	CAI	Empirical: awaiting culture	No Ventilation	1	1	1	0	0	0	0	0	0	0	0	0	0	0	0	0	0	1
2nd PPS/C18H52P14	2nd PPS	South-East Asia	C18	H52	Male	23	14	Co-amoxiclav	100	mg	3	300	21.428571428571427	Bacterial LRTI	CAI	Empirical: awaiting culture	No Ventilation	1	1	0	0	0	0	0	0	0	0	0	0	0	0	0	0	0	0
2nd PPS/C18H49P1	2nd PPS	South-East Asia	C18	H49	Male	84	18	Pip-taz	2000	mg	2	4000	222.22222222222223	Sepsis	CAI	Empirical: awaiting culture	No Ventilation	3	1	1	0	0	1	0	0	0	0	0	0	0	0	0	0	0	0
2nd PPS/C18H49P2	2nd PPS	South-East Asia	C18	H49	Male	36	12	Cefotaxime	600	mg	3	1800	150	Upper Respiratory Infections (URTI)	CAI	Empirical: awaiting culture	No Ventilation	2	2	1	0	0	1	0	0	0	0	0	0	0	0	0	0	0	0
3rd PPS/C18H55P14	3rd PPS	South-East Asia	C18	H55	Female	36	8.5	Amikacin	64	mg	2	128	15.058823529411764	Bacterial LRTI	HAI	Targeted	No Ventilation	2	2	1	0	0	0	0	0	0	0	0	0	0	0	1	0	0	0
3rd PPS/C18H55P15	3rd PPS	South-East Asia	C18	H55	Female	36	8.5	Meropenem	170	mg	3	510	60	Bacterial LRTI	HAI	Targeted	No Ventilation	2	2	1	0	0	0	0	0	0	0	0	0	0	0	1	0	0	0
3rd PPS/C18H55P16	3rd PPS	South-East Asia	C18	H55	Male	3	3.700000047683716	Ampicillin	150	mg	2	300	81.08108003614942	Bacterial LRTI	CAI	Empirical: pathogen determined	No Ventilation	1	1	0	0	0	0	0	0	0	0	0	0	0	0	0	0	0	0
3rd PPS/C18H55P17	3rd PPS	South-East Asia	C18	H55	Female	3	1.7999999523162842	Ceftriaxone	80	mg	2	160	88.88889124364034	Other	CAI	Empirical: awaiting culture	No Ventilation	2	2	0	0	0	0	0	0	0	0	0	0	0	0	0	0	0	0
3rd PPS/C18H55P18	3rd PPS	South-East Asia	C18	H55	Female	3	1.7999999523162842	Amikacin	25	mg	1	25	13.888889256818805	Other	CAI	Empirical: awaiting culture	No Ventilation	2	2	0	0	0	0	0	0	0	0	0	0	0	0	0	0	0	0
3rd PPS/C18H55P19	3rd PPS	South-East Asia	C18	H55	Male	3	6.5	Ceftriaxone	250	mg	2	500	76.92307692307692	Bacterial LRTI	CAI	Empirical: pathogen determined	No Ventilation	2	2	0	0	0	0	0	0	0	0	0	0	0	0	0	0	0	0
3rd PPS/C18H55P20	3rd PPS	South-East Asia	C18	H55	Male	3	6.5	Amikacin	30	mg	1	30	4.615384615384615	Bacterial LRTI	CAI	Empirical: pathogen determined	No Ventilation	2	2	0	0	0	0	0	0	0	0	0	0	0	0	0	0	0	0
3rd PPS/C18H55P21	3rd PPS	South-East Asia	C18	H55	Male	2	4	Ampicillin	200	mg	4	800	200	Bacterial LRTI	CAI	Empirical: pathogen determined	No Ventilation	2	2	0	0	0	0	0	0	0	0	0	0	0	0	0	0	0	0
3rd PPS/C18H55P22	3rd PPS	South-East Asia	C18	H55	Male	2	4	Gentamicin	16	mg	1	16	4	Viral LRTI	CAI	Empirical: pathogen determined	No Ventilation	2	2	0	0	0	0	0	0	0	0	0	0	0	0	0	0	0	0
3rd PPS/C18H55P23	3rd PPS	South-East Asia	C18	H55	Male	108	21	Ceftriaxone	700	mg	2	1400	66.66666666666667	GI tract infections	CAI	Empirical: pathogen determined	No Ventilation	1	1	0	0	0	0	0	0	0	0	0	0	0	0	0	0	0	0
3rd PPS/C18H55P24	3rd PPS	South-East Asia	C18	H55	Male	4	5.699999809265137	Co-amoxiclav	300	mg	3	900	157.89474212561967	Bacterial LRTI	CAI	Empirical: awaiting culture	No Ventilation	1	1	0	0	0	0	0	0	0	0	0	0	0	0	0	0	0	0
3rd PPS/C18H55P25	3rd PPS	South-East Asia	C18	H55	Male	132	25	Pip-taz	1900	mg	4	7600	304	Sepsis	CAI	Targeted	No Ventilation	2	2	0	0	0	0	0	0	0	0	0	0	0	0	0	0	0	0
3rd PPS/C18H55P26	3rd PPS	South-East Asia	C18	H55	Female	10	7	Co-amoxiclav	300	mg	3	900	128.57142857142858	Bacterial LRTI	CAI	Empirical: awaiting culture	No Ventilation	1	1	0	0	0	0	0	0	0	0	0	0	0	0	0	0	0	0
3rd PPS/C18H55P27	3rd PPS	South-East Asia	C18	H55	Female	72	16	Ceftriaxone	950	mg	2	1900	118.75	Sepsis	CAI	Empirical: pathogen determined	No Ventilation	1	1	0	0	0	0	0	0	0	0	0	0	0	0	0	0	0	0
3rd PPS/C18H55P28	3rd PPS	South-East Asia	C18	H55	Female	60	10	Ceftriaxone	500	mg	2	1000	100	GI tract infections	CAI	Empirical: pathogen determined	No Ventilation	1	1	0	0	0	0	0	0	0	0	0	0	0	0	0	0	0	0
3rd PPS/C18H55P29	3rd PPS	South-East Asia	C18	H55	Male	7	7	Co-amoxiclav	200	mg	3	600	85.71428571428571	Bacterial LRTI	CAI	Empirical: pathogen determined	No Ventilation	1	1	0	0	0	0	0	0	0	0	0	0	0	0	0	0	0	0
3rd PPS/C18H55P30	3rd PPS	South-East Asia	C18	H55	Female	108	23	Co-amoxiclav	1200	mg	3	3600	156.52173913043478	Sepsis	CAI	Empirical: pathogen determined	No Ventilation	1	1	0	0	0	0	0	0	0	0	0	0	0	0	0	0	0	0
3rd PPS/C18H55P31	3rd PPS	South-East Asia	C18	H55	Male	12	9	Co-amoxiclav	250	mg	3	750	83.33333333333333	Sepsis	CAI	Empirical: awaiting culture	No Ventilation	1	1	0	0	0	0	0	0	0	0	0	0	0	0	0	0	0	0
3rd PPS/C18H55P32	3rd PPS	South-East Asia	C18	H55	Male	12	7	Ceftriaxone	300	mg	2	600	85.71428571428571	Sepsis	CAI	Empirical: pathogen determined	No Ventilation	1	1	0	0	0	0	0	0	0	0	0	0	0	0	0	0	0	0
3rd PPS/C18H55P33	3rd PPS	South-East Asia	C18	H55	Male	36	10	Ceftriaxone	400	mg	2	800	80	Sepsis	CAI	Empirical: awaiting culture	No Ventilation	2	2	0	0	0	0	0	0	0	0	0	0	0	0	0	0	0	0
3rd PPS/C18H55P34	3rd PPS	South-East Asia	C18	H55	Male	72	14	Co-amoxiclav	500	mg	3	1500	107.14285714285714	Bacterial LRTI	CAI	Empirical: awaiting culture	No Ventilation	1	1	0	0	0	0	0	0	0	0	0	0	0	0	0	0	0	0
3rd PPS/C18H55P35	3rd PPS	South-East Asia	C18	H55	Female	12	9	Co-amoxiclav	300	mg	3	900	100	Sepsis	CAI	Empirical: pathogen determined	No Ventilation	2	1	0	0	0	0	0	0	0	0	0	0	0	0	0	0	0	0
3rd PPS/C18H55P36	3rd PPS	South-East Asia	C18	H55	Female	8	7.5	Gentamicin	56	mg	1	56	7.466666666666667	Bacterial LRTI	CAI	Empirical: awaiting culture	No Ventilation	2	2	0	0	0	0	0	0	0	0	0	0	0	0	0	0	0	0
3rd PPS/C18H55P37	3rd PPS	South-East Asia	C18	H55	Female	8	7.5	Ampicillin	375	mg	4	1500	200	Bacterial LRTI	CAI	Empirical: awaiting culture	No Ventilation	2	2	0	0	0	0	0	0	0	0	0	0	0	0	0	0	0	0
3rd PPS/C18H55P38	3rd PPS	South-East Asia	C18	H55	Female	48	15	Ceftriaxone	750	mg	2	1500	100	Sepsis	CAI	Empirical: pathogen determined	No Ventilation	1	1	0	0	0	0	0	0	0	0	0	0	0	0	0	0	0	0
3rd PPS/C18H51P12	3rd PPS	South-East Asia	C18	H51	Male	72	14	Ceftriaxone	700	mg	2	1400	100	Bacterial LRTI	CAI	Empirical: awaiting culture	No Ventilation	1	1	1	0	0	0	0	0	1	0	0	0	0	0	0	0	0	0
3rd PPS/C18H51P13	3rd PPS	South-East Asia	C18	H51	Male	48	12	Ceftriaxone	500	mg	2	1000	83.33333333333333	Bacterial LRTI	CAI	Empirical: awaiting culture	No Ventilation	4	3	0	0	0	0	0	0	0	0	0	0	0	0	0	0	0	0
3rd PPS/C18H51P14	3rd PPS	South-East Asia	C18	H51	Female	8	7	Ceftriaxone	300	mg	2	600	85.71428571428571	Sepsis	CAI	Empirical: awaiting culture	No Ventilation	1	1	0	0	0	0	0	0	0	0	0	0	0	0	0	0	0	0
3rd PPS/C18H51P15	3rd PPS	South-East Asia	C18	H51	Female	48	17	Ceftriaxone	850	mg	2	1700	100	Bacterial LRTI	CAI	Empirical: awaiting culture	No Ventilation	1	1	0	0	0	0	0	0	0	0	0	0	0	0	0	0	0	0
3rd PPS/C18H51P16	3rd PPS	South-East Asia	C18	H51	Female	24	12	Ceftriaxone	500	mg	2	1000	83.33333333333333	Bacterial LRTI	CAI	Empirical: awaiting culture	No Ventilation	1	1	0	0	0	0	0	0	0	0	0	0	0	0	0	0	0	0
3rd PPS/C18H51P17	3rd PPS	South-East Asia	C18	H51	Female	60	19	Ceftriaxone	1000	mg	2	2000	105.26315789473684	Bacterial LRTI	CAI	Empirical: awaiting culture	No Ventilation	1	1	0	0	0	0	0	0	0	0	0	0	0	0	0	0	0	0
3rd PPS/C18H51P18	3rd PPS	South-East Asia	C18	H51	Male	96	26	Ceftriaxone	1000	mg	2	2000	76.92307692307692	Bacterial LRTI	CAI	Empirical: awaiting culture	No Ventilation	2	1	0	0	0	0	0	0	0	0	0	0	0	0	0	0	0	0
3rd PPS/C18H51P19	3rd PPS	South-East Asia	C18	H51	Female	60	17	Ceftriaxone	1000	mg	2	2000	117.6470588235294	Bacterial LRTI	CAI	Empirical: awaiting culture	No Ventilation	2	1	0	0	0	0	0	0	0	0	0	0	0	0	0	0	0	0
3rd PPS/C18H51P20	3rd PPS	South-East Asia	C18	H51	Male	84	26	Ceftriaxone	1000	mg	2	2000	76.92307692307692	Bacterial LRTI	CAI	Empirical: awaiting culture	No Ventilation	1	1	0	0	0	0	0	0	0	0	0	0	0	0	0	0	0	0
3rd PPS/C18H51P21	3rd PPS	South-East Asia	C18	H51	Male	9	9	Ceftriaxone	250	mg	2	500	55.55555555555556	Viral LRTI	CAI	Empirical: awaiting culture	No Ventilation	1	1	0	0	0	0	0	0	0	0	0	0	0	0	0	0	0	0
3rd PPS/C18H51P22	3rd PPS	South-East Asia	C18	H51	Female	2	4.5	Ceftriaxone	250	mg	2	500	111.11111111111111	Bacterial LRTI	CAI	Empirical: awaiting culture	No Ventilation	2	1	0	0	0	0	0	0	0	0	0	0	0	0	0	0	0	0
3rd PPS/C18H51P23	3rd PPS	South-East Asia	C18	H51	Female	84	25	Ceftriaxone	1000	mg	2	2000	80	Sepsis	CAI	Empirical: awaiting culture	No Ventilation	1	1	0	0	0	0	0	0	0	0	0	0	0	0	0	0	0	0
3rd PPS/C18H51P24	3rd PPS	South-East Asia	C18	H51	Female	48	14	Ceftriaxone	500	mg	2	1000	71.42857142857143	Bacterial LRTI	CAI	Empirical: awaiting culture	No Ventilation	1	1	0	0	0	0	0	0	0	0	0	0	0	0	0	0	0	0
3rd PPS/C18H51P25	3rd PPS	South-East Asia	C18	H51	Male	84	16	Ceftriaxone	750	mg	2	1500	93.75	Bacterial LRTI	CAI	Empirical: awaiting culture	No Ventilation	1	1	0	0	0	0	0	0	0	0	0	0	0	0	0	0	0	0
3rd PPS/C18H51P26	3rd PPS	South-East Asia	C18	H51	Female	24	10	Ceftriaxone	500	mg	2	1000	100	Bacterial LRTI	CAI	Empirical: awaiting culture	No Ventilation	4	3	0	0	0	0	0	0	0	0	0	0	0	0	0	0	0	0
3rd PPS/C18H51P27	3rd PPS	South-East Asia	C18	H51	Male	23	10	Ceftriaxone	500	mg	2	1000	100	Bacterial LRTI	CAI	Empirical: awaiting culture	No Ventilation	3	2	0	0	0	0	0	0	0	0	0	0	0	0	0	0	0	0
3rd PPS/C18H56P3	3rd PPS	South-East Asia	C18	H56	Male	2	4.400000095367432	Cefotaxime	220	mg	2	440	99.99999783255842	Bacterial LRTI	CAI	Empirical: awaiting culture	No Ventilation	1	1	0	0	0	0	0	0	0	0	0	0	0	0	0	0	0	0
3rd PPS/C18H52P15	3rd PPS	South-East Asia	C18	H52	Female	6	6	Co-amoxiclav	200	mg	3	600	100	Bacterial LRTI	CAI	Empirical: awaiting culture	No Ventilation	1	1	0	0	0	0	0	0	0	0	0	0	0	0	0	0	0	0
3rd PPS/C18H52P16	3rd PPS	South-East Asia	C18	H52	Female	6	6	Co-amoxiclav	200	mg	3	600	100	Bacterial LRTI	CAI	Empirical: awaiting culture	No Ventilation	1	1	0	0	0	0	0	0	0	0	0	0	0	0	0	0	0	0
3rd PPS/C18H52P17	3rd PPS	South-East Asia	C18	H52	Male	48	14	Co-amoxiclav	475	mg	3	1425	101.78571428571429	Bacterial LRTI	CAI	Empirical: awaiting culture	No Ventilation	1	1	0	0	0	0	0	0	0	0	0	0	0	0	0	0	0	0
3rd PPS/C18H52P18	3rd PPS	South-East Asia	C18	H52	Female	10	5.800000190734863	Ceftriaxone	290	mg	2	580	99.99999671146799	Bacterial LRTI	CAI	Empirical: awaiting culture	No Ventilation	1	1	0	0	0	0	0	0	0	0	0	0	0	0	0	0	0	0
3rd PPS/C18H52P19	3rd PPS	South-East Asia	C18	H52	Male	24	10	Co-amoxiclav	330	mg	3	990	99	Viral LRTI	CAI	Empirical: awaiting culture	No Ventilation	1	1	0	0	0	0	0	0	0	0	0	0	0	0	0	0	0	0
3rd PPS/C18H52P20	3rd PPS	South-East Asia	C18	H52	Male	10	6	Ceftriaxone	300	mg	2	600	100	Bacterial LRTI	CAI	Empirical: awaiting culture	No Ventilation	1	1	0	0	0	0	0	0	0	0	0	0	0	0	0	0	0	0
3rd PPS/C18H52P21	3rd PPS	South-East Asia	C18	H52	Female	4	3.200000047683716	Co-amoxiclav	165	mg	3	495	154.68749769497666	Bacterial LRTI	CAI	Empirical: awaiting culture	No Ventilation	1	1	0	0	0	0	0	0	0	0	0	0	0	0	0	0	0	0
3rd PPS/C18H52P22	3rd PPS	South-East Asia	C18	H52	Male	7	6.800000190734863	Co-amoxiclav	330	mg	3	990	145.58823121047774	Bacterial LRTI	CAI	Empirical: awaiting culture	No Ventilation	1	1	0	0	0	0	0	0	0	0	0	0	0	0	0	0	0	0
3rd PPS/C18H52P23	3rd PPS	South-East Asia	C18	H52	Male	1	5	Co-amoxiclav	160	mg	3	480	96	Bacterial LRTI	CAI	Empirical: awaiting culture	No Ventilation	1	1	0	0	0	0	0	0	0	0	0	0	0	0	0	0	0	0
3rd PPS/C18H52P24	3rd PPS	South-East Asia	C18	H52	Male	72	15	Ceftriaxone	750	mg	2	1500	100	Urinary Tract Infections (UTI)	CAI	Empirical: awaiting culture	No Ventilation	1	1	0	0	0	0	0	0	0	0	0	0	0	0	0	0	0	0
3rd PPS/C18H52P25	3rd PPS	South-East Asia	C18	H52	Male	11	8.5	Co-amoxiclav	285	mg	3	855	100.58823529411765	Bacterial LRTI	CAI	Empirical: awaiting culture	No Ventilation	1	1	0	0	0	0	0	0	0	0	0	0	0	0	0	0	0	0
3rd PPS/C18H52P26	3rd PPS	South-East Asia	C18	H52	Female	60	13	Co-amoxiclav	430	mg	3	1290	99.23076923076923	Bacterial LRTI	CAI	Empirical: awaiting culture	No Ventilation	1	1	0	0	0	0	0	0	0	0	0	0	0	0	0	0	0	0
3rd PPS/C18H52P27	3rd PPS	South-East Asia	C18	H52	Male	24	10	Ceftriaxone	500	mg	2	1000	100	Bacterial LRTI	CAI	Empirical: awaiting culture	No Ventilation	1	1	0	0	0	0	0	0	0	0	0	0	0	0	0	0	0	0
3rd PPS/C18H52P28	3rd PPS	South-East Asia	C18	H52	Female	3	4.199999809265137	Co-amoxiclav	140	mg	3	420	100.00000454130648	Bacterial LRTI	CAI	Empirical: awaiting culture	No Ventilation	1	1	0	0	0	0	0	0	0	0	0	0	0	0	0	0	0	0
3rd PPS/C18H52P29	3rd PPS	South-East Asia	C18	H52	Female	15	8.300000190734863	Co-amoxiclav	240	mg	3	720	86.74698595835247	Bacterial LRTI	CAI	Empirical: awaiting culture	No Ventilation	1	1	0	0	0	0	0	0	0	0	0	0	0	0	0	0	0	0
3rd PPS/C18H52P30	3rd PPS	South-East Asia	C18	H52	Male	3	5	Co-amoxiclav	160	mg	3	480	96	Bacterial LRTI	CAI	Empirical: awaiting culture	No Ventilation	1	1	0	0	0	0	0	0	0	0	0	0	0	0	0	0	0	0
3rd PPS/C18H52P31	3rd PPS	South-East Asia	C18	H52	Male	48	15	Co-amoxiclav	200	mg	3	600	40	Lymphadenitis	CAI	Empirical: awaiting culture	No Ventilation	1	1	0	0	0	0	0	0	0	0	0	0	0	0	0	0	0	0
3rd PPS/C18H50P89	3rd PPS	South-East Asia	C18	H50	Male	1	3.680000066757202	Meropenem	133	mg	3	399	108.42391107660953	Sepsis	HAI	Targeted	No Ventilation	2	2	1	0	0	0	0	0	1	0	0	0	0	0	0	0	0	0
3rd PPS/C18H50P90	3rd PPS	South-East Asia	C18	H50	Male	1	3.680000066757202	Vancomycin	50	mg	3	150	40.760868825793054	Sepsis	HAI	Targeted	No Ventilation	2	2	1	0	0	0	0	0	1	0	0	0	0	0	0	0	0	0
3rd PPS/C18H50P91	3rd PPS	South-East Asia	C18	H50	Female	2	3.869999885559082	Amikacin	54	mg	1	54	13.953488784715779	Sepsis	HAI	Targeted	No Ventilation	2	2	1	0	0	0	0	0	0	0	0	0	1	0	0	0	0	0
3rd PPS/C18H50P92	3rd PPS	South-East Asia	C18	H50	Female	2	2.5	Ciprofloxacin	38	mg	2	76	30.4	Sepsis	HAI	Targeted	No Ventilation	2	2	1	0	0	0	0	0	0	0	0	0	0	0	0	0	0	1
3rd PPS/C18H50P93	3rd PPS	South-East Asia	C18	H50	Male	120	17	Ceftriaxone	850	mg	2	1700	100	Other	Unknown	Empirical: awaiting culture	No Ventilation	1	1	1	0	0	0	0	0	1	0	0	0	0	0	0	0	0	0
3rd PPS/C18H50P94	3rd PPS	South-East Asia	C18	H50	Female	4	5.5	Ceftriaxone	270	mg	2	540	98.18181818181819	Other	Unknown	Empirical: awaiting culture	No Ventilation	1	1	1	0	0	0	0	0	0	0	0	0	0	0	0	0	0	1
3rd PPS/C18H50P95	3rd PPS	South-East Asia	C18	H50	Male	9	6.5	Ceftriaxone	350	mg	2	700	107.6923076923077	Bacterial LRTI	Unknown	Empirical: awaiting culture	No Ventilation	3	3	1	0	0	0	0	0	0	0	0	0	0	0	0	0	0	1
3rd PPS/C18H50P96	3rd PPS	South-East Asia	C18	H50	Male	84	25	Meropenem	120	mg	3	360	14.4	GI tract infections	Unknown	Empirical: awaiting culture	No Ventilation	1	1	1	0	0	0	0	1	0	0	0	0	0	0	0	0	0	0
3rd PPS/C18H50P97	3rd PPS	South-East Asia	C18	H50	Female	3	4.5	Amikacin	54	mg	1	54	12	Sepsis	HAI	Targeted	No Ventilation	2	2	1	0	0	1	0	0	0	0	0	0	0	0	0	0	0	0
3rd PPS/C18H50P98	3rd PPS	South-East Asia	C18	H50	Female	3	4.5	Meropenem	144	mg	3	432	96	Sepsis	HAI	Targeted	No Ventilation	2	2	1	0	0	1	0	0	0	0	0	0	0	0	0	0	0	0
3rd PPS/C18H50P99	3rd PPS	South-East Asia	C18	H50	Female	12	6.5	Amikacin	50	mg	2	100	15.384615384615385	Skin/Soft Tissue Infections (SSTI)	HAI	Targeted	No Ventilation	4	4	2	0	0	1	0	0	0	0	0	0	0	1	0	0	0	0
3rd PPS/C18H50P100	3rd PPS	South-East Asia	C18	H50	Female	12	6.5	Cefotaxime	200	mg	3	600	92.3076923076923	Treatment for Surgical disease	HAI	Empirical: awaiting culture	No Ventilation	4	4	2	0	0	1	0	0	0	0	0	0	0	1	0	0	0	0
3rd PPS/C18H50P101	3rd PPS	South-East Asia	C18	H50	Female	12	6.5	Metronidazole	50	mg	3	150	23.076923076923077	Treatment for Surgical disease	HAI	Empirical: awaiting culture	No Ventilation	4	4	2	0	0	1	0	0	0	0	0	0	0	1	0	0	0	0
3rd PPS/C18H50P102	3rd PPS	South-East Asia	C18	H50	Female	10	7.25	Amikacin	60	mg	2	120	16.551724137931036	Treatment for Surgical disease	Unknown	Empirical: awaiting culture	No Ventilation	2	2	1	0	0	0	0	0	0	0	0	0	0	1	0	0	0	0
3rd PPS/C18H50P103	3rd PPS	South-East Asia	C18	H50	Female	108	25	Cefotaxime	900	mg	3	2700	108	Treatment for Surgical disease	Unknown	Empirical: awaiting culture	No Ventilation	2	2	1	0	0	0	0	0	0	0	0	0	0	0	0	0	1	0
3rd PPS/C18H50P104	3rd PPS	South-East Asia	C18	H50	Female	8	6.449999809265137	Cefotaxime	210	mg	3	630	97.67442149301046	Treatment for Surgical disease	Unknown	Empirical: awaiting culture	No Ventilation	1	1	1	0	0	0	0	0	0	0	0	0	0	1	0	0	0	0
3rd PPS/C18H50P105	3rd PPS	South-East Asia	C18	H50	Female	60	13.5	Amikacin	100	mg	2	200	14.814814814814815	Treatment for Surgical disease	CAI	Empirical: awaiting culture	No Ventilation	4	4	1	0	0	0	0	0	0	0	0	0	0	0	0	0	0	1
3rd PPS/C18H50P106	3rd PPS	South-East Asia	C18	H50	Female	60	13.5	Metronidazole	100	mg	3	300	22.22222222222222	Treatment for Surgical disease	CAI	Empirical: awaiting culture	No Ventilation	4	4	1	0	0	0	0	0	0	0	0	0	0	0	0	0	0	1
3rd PPS/C18H50P107	3rd PPS	South-East Asia	C18	H50	Female	60	13.5	Cefotaxime	450	mg	3	1350	100	Treatment for Surgical disease	CAI	Empirical: awaiting culture	No Ventilation	4	4	1	0	0	0	0	0	0	0	0	0	0	0	0	0	0	1
3rd PPS/C18H50P108	3rd PPS	South-East Asia	C18	H50	Male	12	9.199999809265137	Amikacin	70	mg	2	140	15.217391619835556	Treatment for Surgical disease	Unknown	Empirical: awaiting culture	No Ventilation	3	3	1	0	0	0	0	1	0	0	0	0	0	0	0	0	0	0
3rd PPS/C18H50P109	3rd PPS	South-East Asia	C18	H50	Male	12	9.199999809265137	Metronidazole	70	mg	3	210	22.826087429753333	Treatment for Surgical disease	Unknown	Empirical: awaiting culture	No Ventilation	3	3	1	0	0	0	0	1	0	0	0	0	0	0	0	0	0	0
3rd PPS/C18H50P110	3rd PPS	South-East Asia	C18	H50	Male	12	9.199999809265137	Cefotaxime	310	mg	3	930	101.08695861747904	Treatment for Surgical disease	Unknown	Empirical: awaiting culture	No Ventilation	3	3	1	0	0	0	0	1	0	0	0	0	0	0	0	0	0	0
3rd PPS/C18H50P111	3rd PPS	South-East Asia	C18	H50	Female	60	12.300000190734863	Metronidazole	90	mg	3	270	21.951219171799774	Bacterial LRTI	CAI	Targeted	No Ventilation	4	4	1	0	0	0	0	0	0	0	0	0	0	0	0	0	0	1
3rd PPS/C18H50P112	3rd PPS	South-East Asia	C18	H50	Female	60	12.300000190734863	Amikacin	90	mg	2	180	14.634146114533182	Bacterial LRTI	CAI	Targeted	No Ventilation	4	4	1	0	0	0	0	0	0	0	0	0	0	0	0	0	0	1
3rd PPS/C18H50P113	3rd PPS	South-East Asia	C18	H50	Female	60	12.300000190734863	Cefotaxime	400	mg	3	1200	97.56097409688788	Bacterial LRTI	CAI	Targeted	No Ventilation	4	4	1	0	0	0	0	0	0	0	0	0	0	0	0	0	0	1
3rd PPS/C18H50P114	3rd PPS	South-East Asia	C18	H50	Male	5	5.849999904632568	Cefotaxime	250	mg	3	750	128.20513029514427	Treatment for Surgical disease	Unknown	Empirical: awaiting culture	Non-Invasive Ventilation	2	2	1	0	0	0	0	1	0	0	0	0	0	0	0	0	0	0
3rd PPS/C18H50P115	3rd PPS	South-East Asia	C18	H50	Male	5	5.849999904632568	Metronidazole	50	mg	3	150	25.641026059028853	Treatment for Surgical disease	Unknown	Empirical: awaiting culture	Non-Invasive Ventilation	2	2	1	0	0	0	0	1	0	0	0	0	0	0	0	0	0	0
3rd PPS/C18H50P116	3rd PPS	South-East Asia	C18	H50	Male	48	12.5	Amikacin	180	mg	1	180	14.4	Other	Unknown	Empirical: awaiting culture	No Ventilation	1	1	1	0	0	0	0	0	1	0	0	0	0	0	0	0	0	0
3rd PPS/C18H50P117	3rd PPS	South-East Asia	C18	H50	Male	24	15	Cefuroxime	750	mg	2	1500	100	Sepsis	HAI	Targeted	No Ventilation	1	1	1	0	0	0	0	0	0	0	0	0	1	0	0	0	0	0
3rd PPS/C18H53P2	3rd PPS	South-East Asia	C18	H53	Male	60	15	Ceftriaxone	750	mg	3	2250	150	Bacterial LRTI	CAI	Empirical: pathogen determined	No Ventilation	1	1	0	0	0	0	0	0	0	0	0	0	0	0	0	0	0	0
3rd PPS/C18H53P3	3rd PPS	South-East Asia	C18	H53	Female	6	4.800000190734863	Ceftriaxone	200	mg	2	400	83.33333002196431	Bacterial LRTI	CAI	Unknown	No Ventilation	1	1	0	0	0	0	0	0	0	0	0	0	0	0	0	0	0	0
3rd PPS/C18H53P4	3rd PPS	South-East Asia	C18	H53	Male	132	19.275	Ceftriaxone	300	mg	2	600	31.128404669260703	Sepsis	CAI	Empirical: pathogen determined	No Ventilation	1	1	0	0	0	0	0	0	0	0	0	0	0	0	0	0	0	0
3rd PPS/C18H53P5	3rd PPS	South-East Asia	C18	H53	Male	120	21	Clindamycin	200	mg	3	600	28.571428571428573	Sepsis	CAI	Empirical: pathogen determined	No Ventilation	3	3	0	0	0	0	0	0	0	0	0	0	0	0	0	0	0	0
3rd PPS/C18H53P6	3rd PPS	South-East Asia	C18	H53	Male	120	21	Ceftriaxone	1000	mg	2	2000	95.23809523809524	Sepsis	CAI	Empirical: pathogen determined	No Ventilation	3	3	0	0	0	0	0	0	0	0	0	0	0	0	0	0	0	0
4th PPS/C18H55P39	4th PPS	South-East Asia	C18	H55	Female	3	2.5	Cefotaxime	135	mg	2	270	108	Sepsis	HAI	Targeted	No Ventilation	2	2	1	0	0	0	0	0	0	0	0	0	0	0	1	0	0	0
4th PPS/C18H55P40	4th PPS	South-East Asia	C18	H55	Female	3	2.5	Amikacin	38	mg	1	38	15.2	Sepsis	HAI	Targeted	No Ventilation	2	2	1	0	0	0	0	0	0	0	0	0	0	0	1	0	0	0
4th PPS/C18H55P41	4th PPS	South-East Asia	C18	H55	Male	12	6.5	Vancomycin	100	mg	4	400	61.53846153846154	Bacterial LRTI	CAI	Empirical: awaiting culture	No Ventilation	2	2	0	0	0	0	0	0	0	0	0	0	0	0	0	0	0	0
4th PPS/C18H55P42	4th PPS	South-East Asia	C18	H55	Male	12	6.5	Ceftriaxone	300	mg	2	600	92.3076923076923	Bacterial LRTI	CAI	Empirical: awaiting culture	No Ventilation	2	2	0	0	0	0	0	0	0	0	0	0	0	0	0	0	0	0
4th PPS/C18H55P43	4th PPS	South-East Asia	C18	H55	Female	8	5.599999904632568	Vancomycin	120	mg	4	480	85.71428717399132	Bacterial LRTI	CAI	Empirical: awaiting culture	No Ventilation	3	2	0	0	0	0	0	0	0	0	0	0	0	0	0	0	0	0
4th PPS/C18H55P44	4th PPS	South-East Asia	C18	H55	Female	8	5.599999904632568	Meropenem	160	mg	3	480	85.71428717399132	Bacterial LRTI	CAI	Empirical: awaiting culture	No Ventilation	3	2	0	0	0	0	0	0	0	0	0	0	0	0	0	0	0	0
4th PPS/C18H55P45	4th PPS	South-East Asia	C18	H55	Female	5	5	Pip-taz	500	mg	3	1500	300	Bacterial LRTI	CAI	Empirical: pathogen determined	No Ventilation	1	1	1	0	0	0	0	0	0	0	0	0	0	0	1	0	0	0
4th PPS/C18H55P46	4th PPS	South-East Asia	C18	H55	Male	2	4	Ampicillin	200	mg	4	800	200	Bacterial LRTI	CAI	Empirical: pathogen determined	No Ventilation	2	2	0	0	0	0	0	0	0	0	0	0	0	0	0	0	0	0
4th PPS/C18H55P47	4th PPS	South-East Asia	C18	H55	Male	2	4	Gentamicin	25	mg	1	25	6.25	Bacterial LRTI	CAI	Empirical: pathogen determined	No Ventilation	2	2	0	0	0	0	0	0	0	0	0	0	0	0	0	0	0	0
4th PPS/C18H55P48	4th PPS	South-East Asia	C18	H55	Male	7	6.699999809265137	Co-amoxiclav	220	mg	3	660	98.50746549086686	Bacterial LRTI	CAI	Empirical: awaiting culture	No Ventilation	1	1	0	0	0	0	0	0	0	0	0	0	0	0	0	0	0	0
4th PPS/C18H55P49	4th PPS	South-East Asia	C18	H55	Male	24	11	Ceftriaxone	500	mg	2	1000	90.9090909090909	Upper Respiratory Infections (URTI)	CAI	Empirical: pathogen determined	No Ventilation	1	1	0	0	0	0	0	0	0	0	0	0	0	0	0	0	0	0
4th PPS/C18H55P50	4th PPS	South-East Asia	C18	H55	Male	7	6.699999809265137	Co-amoxiclav	250	mg	2	500	74.62686779611126	Bacterial LRTI	CAI	Empirical: awaiting culture	No Ventilation	1	1	0	0	0	0	0	0	0	0	0	0	0	0	0	0	0	0
4th PPS/C18H55P51	4th PPS	South-East Asia	C18	H55	Male	4	5.599999904632568	Ceftriaxone	300	mg	2	600	107.14285896748916	Bacterial LRTI	CAI	Empirical: pathogen determined	No Ventilation	1	1	0	0	0	0	0	0	0	0	0	0	0	0	0	0	0	0
4th PPS/C18H51P28	4th PPS	South-East Asia	C18	H51	Male	24	12	Metronidazole	50	mg	3	150	12.5	Treatment for Surgical disease	CAI	Empirical: awaiting culture	No Ventilation	2	2	0	0	0	0	0	0	0	0	0	0	0	0	0	0	0	0
4th PPS/C18H51P29	4th PPS	South-East Asia	C18	H51	Female	18	9	Ceftriaxone	250	mg	2	500	55.55555555555556	GI tract infections	CAI	Empirical: awaiting culture	No Ventilation	1	1	0	0	0	0	0	0	0	0	0	0	0	0	0	0	0	0
4th PPS/C18H51P30	4th PPS	South-East Asia	C18	H51	Male	132	37	Ceftriaxone	1000	mg	2	2000	54.054054054054056	Bacterial LRTI	CAI	Empirical: awaiting culture	No Ventilation	1	1	1	0	0	0	0	0	0	0	0	0	0	0	0	0	0	1
4th PPS/C18H51P31	4th PPS	South-East Asia	C18	H51	Male	10	9	Cefotaxime	400	mg	1	400	44.44444444444444	GI tract infections	CAI	Empirical: awaiting culture	No Ventilation	1	1	0	0	0	0	0	0	0	0	0	0	0	0	0	0	0	0
4th PPS/C18H51P32	4th PPS	South-East Asia	C18	H51	Female	11	8	Gentamicin	20	mg	2	40	5	Upper Respiratory Infections (URTI)	CAI	Empirical: awaiting culture	No Ventilation	2	2	0	0	0	0	0	0	0	0	0	0	0	0	0	0	0	0
4th PPS/C18H51P33	4th PPS	South-East Asia	C18	H51	Female	11	8	Co-amoxiclav	300	mg	2	600	75	Upper Respiratory Infections (URTI)	CAI	Empirical: awaiting culture	No Ventilation	2	2	0	0	0	0	0	0	0	0	0	0	0	0	0	0	0	0
4th PPS/C18H51P34	4th PPS	South-East Asia	C18	H51	Male	60	17	Ceftriaxone	750	mg	2	1500	88.23529411764706	Bacterial LRTI	CAI	Empirical: awaiting culture	No Ventilation	1	1	0	0	0	0	0	0	0	0	0	0	0	0	0	0	0	0
4th PPS/C18H51P35	4th PPS	South-East Asia	C18	H51	Male	24	10	Ceftriaxone	250	mg	2	500	50	Urinary Tract Infections (UTI)	CAI	Empirical: pathogen determined	No Ventilation	1	1	0	0	0	0	0	0	0	0	0	0	0	0	0	0	0	0
4th PPS/C18H51P36	4th PPS	South-East Asia	C18	H51	Male	96	32	Ceftriaxone	1000	mg	2	2000	62.5	Upper Respiratory Infections (URTI)	CAI	Empirical: awaiting culture	No Ventilation	1	1	0	0	0	0	0	0	0	0	0	0	0	0	0	0	0	0
4th PPS/C18H51P37	4th PPS	South-East Asia	C18	H51	Male	24	13	Ceftriaxone	500	mg	2	1000	76.92307692307692	Central Nervous System (CNS) infections	CAI	Empirical: awaiting culture	No Ventilation	1	1	0	0	0	0	0	0	0	0	0	0	0	0	0	0	0	0
4th PPS/C18H51P38	4th PPS	South-East Asia	C18	H51	Male	24	11	Ceftriaxone	500	mg	2	1000	90.9090909090909	Upper Respiratory Infections (URTI)	CAI	Empirical: awaiting culture	No Ventilation	2	2	0	0	0	0	0	0	0	0	0	0	0	0	0	0	0	0
4th PPS/C18H51P39	4th PPS	South-East Asia	C18	H51	Male	48	13	Cefotaxime	500	mg	2	1000	76.92307692307692	Urinary Tract Infections (UTI)	CAI	Empirical: pathogen determined	No Ventilation	1	1	0	0	0	0	0	0	0	0	0	0	0	0	0	0	0	0
4th PPS/C18H51P40	4th PPS	South-East Asia	C18	H51	Female	14	10	Vancomycin	200	mg	3	600	60	Bacterial LRTI	CAI	Empirical: awaiting culture	Non-Invasive Ventilation	4	2	0	0	0	0	0	0	0	0	0	0	0	0	0	0	0	0
4th PPS/C18H51P41	4th PPS	South-East Asia	C18	H51	Female	14	10	Meropenem	400	mg	3	1200	120	Bacterial LRTI	CAI	Empirical: awaiting culture	Non-Invasive Ventilation	4	2	0	0	0	0	0	0	0	0	0	0	0	0	0	0	0	0
4th PPS/C18H51P42	4th PPS	South-East Asia	C18	H51	Male	84	20	Vancomycin	400	mg	3	1200	60	Central Nervous System (CNS) infections	CAI	Empirical: pathogen determined	Invasive Ventilation	4	2	0	0	0	0	0	0	0	0	0	0	0	0	0	0	0	0
4th PPS/C18H51P43	4th PPS	South-East Asia	C18	H51	Male	84	20	Meropenem	800	mg	3	2400	120	Central Nervous System (CNS) infections	CAI	Empirical: pathogen determined	Invasive Ventilation	4	2	0	0	0	0	0	0	0	0	0	0	0	0	0	0	0	0
4th PPS/C18H51P44	4th PPS	South-East Asia	C18	H51	Male	60	18	Amikacin	135	mg	2	270	15	GI tract infections	CAI	Empirical: pathogen determined	No Ventilation	1	1	0	0	0	0	0	0	0	0	0	0	0	0	0	0	0	0
4th PPS/C18H56P4	4th PPS	South-East Asia	C18	H56	Male	2	4	Ceftriaxone	190	mg	2	380	95	Bacterial LRTI	CAI	Empirical: pathogen determined	No Ventilation	2	2	1	0	0	0	0	0	0	0	0	0	0	0	0	0	0	1
4th PPS/C18H52P32	4th PPS	South-East Asia	C18	H52	Male	1	4	Co-amoxiclav	200	mg	2	400	100	Bacterial LRTI	CAI	Empirical: awaiting culture	No Ventilation	1	1	0	0	0	0	0	0	0	0	0	0	0	0	0	0	0	0
4th PPS/C18H52P33	4th PPS	South-East Asia	C18	H52	Female	16	8	Co-amoxiclav	400	mg	2	800	100	Bacterial LRTI	CAI	Empirical: awaiting culture	No Ventilation	1	1	0	0	0	0	0	0	0	0	0	0	0	0	0	0	0	0
4th PPS/C18H52P34	4th PPS	South-East Asia	C18	H52	Female	24	10	Co-amoxiclav	200	mg	2	400	40	Other	CAI	Empirical: awaiting culture	No Ventilation	1	1	0	0	0	0	0	0	0	0	0	0	0	0	0	0	0	0
4th PPS/C18H52P35	4th PPS	South-East Asia	C18	H52	Male	132	28	Amikacin	210	mg	2	420	15	Treatment for Surgical disease	CAI	Empirical: awaiting culture	No Ventilation	1	1	0	0	0	0	0	0	0	0	0	0	0	0	0	0	0	0
4th PPS/C18H52P36	4th PPS	South-East Asia	C18	H52	Male	4	4.400000095367432	Co-amoxiclav	210	mg	2	420	95.45454338562395	Bacterial LRTI	CAI	Empirical: awaiting culture	No Ventilation	1	1	0	0	0	0	0	0	0	0	0	0	0	0	0	0	0	0
4th PPS/C18H52P37	4th PPS	South-East Asia	C18	H52	Male	5	6.599999904632568	Co-amoxiclav	330	mg	2	660	100.0000014449611	Bacterial LRTI	CAI	Empirical: awaiting culture	No Ventilation	1	1	0	0	0	0	0	0	0	0	0	0	0	0	0	0	0	0
4th PPS/C18H52P38	4th PPS	South-East Asia	C18	H52	Male	18	5.400000095367432	Co-amoxiclav	180	mg	3	540	99.99999823393648	Bacterial LRTI	CAI	Empirical: awaiting culture	No Ventilation	1	1	0	0	0	0	0	0	0	0	0	0	0	0	0	0	0	0
4th PPS/C18H52P39	4th PPS	South-East Asia	C18	H52	Female	4	5	Co-amoxiclav	160	mg	3	480	96	Bacterial LRTI	CAI	Empirical: awaiting culture	No Ventilation	1	1	0	0	0	0	0	0	0	0	0	0	0	0	0	0	0	0
4th PPS/C18H52P40	4th PPS	South-East Asia	C18	H52	Male	5	7.599999904632568	Co-amoxiclav	250	mg	3	750	98.68421176463946	Bacterial LRTI	CAI	Empirical: awaiting culture	No Ventilation	1	1	0	0	0	0	0	0	0	0	0	0	0	0	0	0	0	0
4th PPS/C18H52P41	4th PPS	South-East Asia	C18	H52	Male	3	4.5	Co-amoxiclav	120	mg	3	360	80	Bacterial LRTI	CAI	Empirical: awaiting culture	No Ventilation	1	1	0	0	0	0	0	0	0	0	0	0	0	0	0	0	0	0
4th PPS/C18H52P42	4th PPS	South-East Asia	C18	H52	Male	18	10	Ceftriaxone	500	mg	2	1000	100	Bacterial LRTI	CAI	Empirical: awaiting culture	No Ventilation	1	1	0	0	0	0	0	0	0	0	0	0	0	0	0	0	0	0
4th PPS/C18H52P43	4th PPS	South-East Asia	C18	H52	Male	2	2.5	Ceftriaxone	125	mg	2	250	100	Bacterial LRTI	CAI	Empirical: awaiting culture	No Ventilation	1	1	0	0	0	0	0	0	0	0	0	0	0	0	0	0	0	0
4th PPS/C18H52P44	4th PPS	South-East Asia	C18	H52	Male	36	10	Ceftriaxone	500	mg	2	1000	100	Sepsis	CAI	Empirical: awaiting culture	No Ventilation	1	1	0	0	0	0	0	0	0	0	0	0	0	0	0	0	0	0
4th PPS/C18H52P45	4th PPS	South-East Asia	C18	H52	Female	18	8	Co-amoxiclav	400	mg	2	800	100	Bacterial LRTI	CAI	Empirical: awaiting culture	No Ventilation	1	1	0	0	0	0	0	0	0	0	0	0	0	0	0	0	0	0
4th PPS/C18H52P46	4th PPS	South-East Asia	C18	H52	Female	16	10	Co-amoxiclav	320	mg	2	640	64	Bacterial LRTI	CAI	Empirical: awaiting culture	No Ventilation	1	1	0	0	0	0	0	0	0	0	0	0	0	0	0	0	0	0
4th PPS/C18H52P47	4th PPS	South-East Asia	C18	H52	Female	7	6	Co-amoxiclav	200	mg	3	600	100	Bacterial LRTI	CAI	Empirical: awaiting culture	No Ventilation	1	1	0	0	0	0	0	0	0	0	0	0	0	0	0	0	0	0
4th PPS/C18H52P48	4th PPS	South-East Asia	C18	H52	Male	10	5	Co-amoxiclav	170	mg	2	340	68	Bacterial LRTI	CAI	Empirical: awaiting culture	No Ventilation	1	1	0	0	0	0	0	0	0	0	0	0	0	0	0	0	0	0
4th PPS/C18H52P49	4th PPS	South-East Asia	C18	H52	Male	84	24	Co-amoxiclav	400	mg	2	800	33.333333333333336	Skin/Soft Tissue Infections (SSTI)	CAI	Empirical: awaiting culture	No Ventilation	1	1	0	0	0	0	0	0	0	0	0	0	0	0	0	0	0	0
4th PPS/C18H52P50	4th PPS	South-East Asia	C18	H52	Male	4	4.300000190734863	Co-amoxiclav	140	mg	3	420	97.67441427211254	Bacterial LRTI	CAI	Empirical: awaiting culture	No Ventilation	1	1	0	0	0	0	0	0	0	0	0	0	0	0	0	0	0	0
4th PPS/C18H52P51	4th PPS	South-East Asia	C18	H52	Male	8	6.300000190734863	Co-amoxiclav	320	mg	2	640	101.58729851170801	Bacterial LRTI	CAI	Empirical: awaiting culture	No Ventilation	1	1	0	0	0	0	0	0	0	0	0	0	0	0	0	0	0	0
4th PPS/C18H52P52	4th PPS	South-East Asia	C18	H52	Male	5	3.700000047683716	Co-amoxiclav	180	mg	2	360	97.29729604337929	Bacterial LRTI	CAI	Empirical: awaiting culture	No Ventilation	1	1	0	0	0	0	0	0	0	0	0	0	0	0	0	0	0	0
4th PPS/C18H50P118	4th PPS	South-East Asia	C18	H50	Male	6	6	Amikacin	50	mg	2	100	16.666666666666668	Urinary Tract Infections (UTI)	CAI	Targeted	No Ventilation	2	1	3	0	0	0	0	1	1	0	0	0	0	0	0	0	1	0
4th PPS/C18H50P119	4th PPS	South-East Asia	C18	H50	Male	84	21	Ceftriaxone	1000	mg	2	2000	95.23809523809524	Upper Respiratory Infections (URTI)	CAI	Empirical: awaiting culture	No Ventilation	1	1	1	0	0	0	0	0	0	0	0	0	0	0	0	0	0	1
4th PPS/C18H50P120	4th PPS	South-East Asia	C18	H50	Male	120	39	Meropenem	1000	mg	3	3000	76.92307692307692	Febrile neutropenia/Fever	CAI	Empirical: awaiting culture	No Ventilation	1	1	1	0	0	0	0	0	1	0	0	0	0	0	0	0	0	0
4th PPS/C18H50P121	4th PPS	South-East Asia	C18	H50	Female	36	15	Teicoplanin	150	mg	1	150	10	Febrile neutropenia/Fever	CAI	Empirical: awaiting culture	No Ventilation	1	1	1	0	0	0	0	0	1	0	0	0	0	0	0	0	0	0
4th PPS/C18H50P122	4th PPS	South-East Asia	C18	H50	Female	36	14	Ceftriaxone	700	mg	2	1400	100	Bacterial LRTI	HAI	Empirical: awaiting culture	No Ventilation	2	2	2	0	0	1	0	0	0	0	0	0	0	0	0	0	0	1
4th PPS/C18H50P123	4th PPS	South-East Asia	C18	H50	Male	10	8	Ceftriaxone	400	mg	2	800	100	GI tract infections	CAI	Empirical: awaiting culture	No Ventilation	1	1	1	0	0	0	0	1	0	0	0	0	0	0	0	0	0	0
4th PPS/C18H50P124	4th PPS	South-East Asia	C18	H50	Female	12	8	Meropenem	165	mg	3	495	61.875	Urinary Tract Infections (UTI)	CAI	Targeted	No Ventilation	1	1	1	0	0	0	0	0	0	0	0	0	0	0	0	0	1	0
4th PPS/C18H50P125	4th PPS	South-East Asia	C18	H50	Male	60	11.399999618530273	Meropenem	450	mg	3	1350	118.42105659421475	Upper Respiratory Infections (URTI)	CAI	Empirical: pathogen determined	Invasive Ventilation	1	1	1	0	0	0	0	0	0	0	0	0	0	0	0	0	0	1
4th PPS/C18H50P126	4th PPS	South-East Asia	C18	H50	Male	2	3.2200000286102295	Ceftriaxone	150	mg	2	300	93.16770103554369	Upper Respiratory Infections (URTI)	CAI	Empirical: pathogen determined	Invasive Ventilation	1	1	1	0	0	0	0	0	0	0	0	0	0	0	0	0	0	1
4th PPS/C18H50P127	4th PPS	South-East Asia	C18	H50	Male	2	3.5999999046325684	Cefotaxime	180	mg	3	540	150.0000039736431	Upper Respiratory Infections (URTI)	CAI	Empirical: no culture	Invasive Ventilation	1	1	1	0	0	0	0	0	0	0	0	0	0	0	0	0	0	1
4th PPS/C18H50P128	4th PPS	South-East Asia	C18	H50	Female	1	2.5	Meropenem	108	mg	3	324	129.6	Bacterial LRTI	Unknown	Targeted	Non-Invasive Ventilation	3	2	1	0	0	1	0	0	0	0	0	0	0	0	0	0	0	0
4th PPS/C18H50P129	4th PPS	South-East Asia	C18	H50	Female	1	1.340000033378601	Amikacin	20	mg	1	20	14.925372762546221	CRBSI	HAI	Empirical: pathogen determined	No Ventilation	2	2	1	0	0	0	0	0	0	0	0	0	0	0	0	1	0	0
4th PPS/C18H50P130	4th PPS	South-East Asia	C18	H50	Male	1	3.799999952316284	Vancomycin	50	mg	3	150	39.47368470585578	CRBSI	Unknown	Empirical: awaiting culture	No Ventilation	3	2	1	0	0	0	0	0	0	0	0	0	1	0	0	0	0	0
4th PPS/C18H50P131	4th PPS	South-East Asia	C18	H50	Male	36	12	Amikacin	90	mg	2	180	15	Treatment for Surgical disease	Unknown	Empirical: awaiting culture	No Ventilation	2	2	1	0	0	0	0	1	0	0	0	0	0	0	0	0	0	0
4th PPS/C18H50P132	4th PPS	South-East Asia	C18	H50	Male	36	12	Cefotaxime	400	mg	3	1200	100	Treatment for Surgical disease	Unknown	Empirical: awaiting culture	No Ventilation	2	2	1	0	0	0	0	1	0	0	0	0	0	0	0	0	0	0
4th PPS/C18H50P133	4th PPS	South-East Asia	C18	H50	Male	12	10	Ceftriaxone	500	mg	2	1000	100	Febrile neutropenia/Fever	Unknown	Empirical: awaiting culture	No Ventilation	2	2	1	0	0	0	0	0	0	0	0	0	1	0	0	0	0	0
4th PPS/C18H50P134	4th PPS	South-East Asia	C18	H50	Male	5	7.340000152587891	Vancomycin	120	mg	4	480	65.39509400837882	Treatment for Surgical disease	HAI	Empirical: pathogen determined	No Ventilation	2	2	1	0	0	0	0	0	0	0	0	0	1	0	0	0	0	0
4th PPS/C18H50P135	4th PPS	South-East Asia	C18	H50	Male	5	7.340000152587891	Ceftriaxone	400	mg	2	800	108.99182334729804	Treatment for Surgical disease	HAI	Empirical: pathogen determined	No Ventilation	2	2	1	0	0	0	0	0	0	0	0	0	1	0	0	0	0	0
4th PPS/C18H53P7	4th PPS	South-East Asia	C18	H53	Female	21	7.800000190734863	Ceftriaxone	400	mg	2	800	102.56410005608339	Bacterial LRTI	CAI	Empirical: pathogen determined	No Ventilation	1	1	0	0	0	0	0	0	0	0	0	0	0	0	0	0	0	0
4th PPS/C18H53P8	4th PPS	South-East Asia	C18	H53	Male	18	7	Ceftriaxone	350	mg	2	700	100	Bacterial LRTI	CAI	Empirical: pathogen determined	Invasive Ventilation	1	1	1	0	0	0	0	0	0	0	0	0	0	1	0	0	0	0
4th PPS/C18H53P9	4th PPS	South-East Asia	C18	H53	Male	60	22.799999237060547	Co-amoxiclav	800	mg	3	2400	105.26316141707977	Upper Respiratory Infections (URTI)	CAI	Empirical: pathogen determined	No Ventilation	1	1	0	0	0	0	0	0	0	0	0	0	0	0	0	0	0	0
2nd PPS/C9H48P1	2nd PPS	Europe	C9	H48	Male	2	5.599999904632568	Ceftriaxone	300	mg	1	300	53.57142948374458	Sepsis	CAI	Targeted	No Ventilation	1	1	0	0	0	0	0	0	0	0	0	0	0	0	0	0	0	0
2nd PPS/C9H48P2	2nd PPS	Europe	C9	H48	Female	15	8.899999618530273	Gentamicin	44	mg	1	44	4.943820436619981	Urinary Tract Infections (UTI)	CAI	Empirical: awaiting culture	No Ventilation	1	1	0	0	0	0	0	0	0	0	0	0	0	0	0	0	0	0
2nd PPS/C9H48P3	2nd PPS	Europe	C9	H48	Male	48	17.700000762939453	Ceftriaxone	850	mg	1	850	48.02259680009414	Pyrexia of Unknown Origin (PUO)	CAI	Empirical: awaiting culture	No Ventilation	1	1	1	0	0	0	0	0	0	1	0	0	0	0	0	0	0	0
4th PPS/C9H48P4	4th PPS	Europe	C9	H48	Male	15	11.300000190734863	Cefuroxime	550	mg	3	1650	146.01769665038358	Skin/Soft Tissue Infections (SSTI)	CAI	Empirical: awaiting culture	No Ventilation	2	2	1	0	0	0	0	0	0	0	0	0	0	0	0	0	0	1
4th PPS/C9H48P5	4th PPS	Europe	C9	H48	Male	15	11.300000190734863	Clindamycin	110	mg	3	330	29.20353933007672	Skin/Soft Tissue Infections (SSTI)	CAI	Empirical: awaiting culture	No Ventilation	2	2	1	0	0	0	0	0	0	0	0	0	0	0	0	0	0	1
2nd PPS/C17H45P1	2nd PPS	Europe	C17	H45	Male	48	15	Ceftazidime	250	mg	3	750	50	GI tract infections	CAI	Empirical: pathogen determined	No Ventilation	3	3	0	0	0	0	0	0	0	0	0	0	0	0	0	0	0	0
2nd PPS/C17H45P2	2nd PPS	Europe	C17	H45	Male	48	15	Gentamicin	75	mg	1	75	5	GI tract infections	CAI	Empirical: pathogen determined	No Ventilation	3	3	0	0	0	0	0	0	0	0	0	0	0	0	0	0	0	0
2nd PPS/C17H45P3	2nd PPS	Europe	C17	H45	Male	48	15	Metronidazole	115	mg	3	345	23	GI tract infections	CAI	Empirical: pathogen determined	No Ventilation	3	3	0	0	0	0	0	0	0	0	0	0	0	0	0	0	0	0
2nd PPS/C17H45P4	2nd PPS	Europe	C17	H45	Male	48	13.199999809265137	Metronidazole	95	mg	3	285	21.59090940288933	GI tract infections	CAI	Empirical: awaiting culture	No Ventilation	3	3	1	0	0	0	0	0	0	0	0	0	0	1	0	0	0	0
2nd PPS/C17H45P5	2nd PPS	Europe	C17	H45	Male	48	13.199999809265137	Ceftazidime	650	mg	3	1950	147.72727486187435	GI tract infections	CAI	Empirical: awaiting culture	No Ventilation	3	3	1	0	0	0	0	0	0	0	0	0	0	1	0	0	0	0
2nd PPS/C17H45P6	2nd PPS	Europe	C17	H45	Male	48	13.199999809265137	Gentamicin	55	mg	3	165	12.500000180620138	GI tract infections	CAI	Empirical: awaiting culture	No Ventilation	3	3	1	0	0	0	0	0	0	0	0	0	0	1	0	0	0	0
2nd PPS/C17H45P7	2nd PPS	Europe	C17	H45	Male	48	16	Meropenem	300	mg	1	300	18.75	Febrile neutropenia/Fever	HAI	Targeted	No Ventilation	3	3	1	0	0	0	0	0	0	1	0	0	0	0	0	0	0	0
2nd PPS/C17H45P8	2nd PPS	Europe	C17	H45	Male	48	16	Metronidazole	120	mg	3	360	22.5	Febrile neutropenia/Fever	HAI	Targeted	No Ventilation	3	3	1	0	0	0	0	0	0	1	0	0	0	0	0	0	0	0
2nd PPS/C17H45P9	2nd PPS	Europe	C17	H45	Male	48	16	Teicoplanin	160	mg	1	160	10	Febrile neutropenia/Fever	HAI	Targeted	No Ventilation	3	3	1	0	0	0	0	0	0	1	0	0	0	0	0	0	0	0
2nd PPS/C17H45P10	2nd PPS	Europe	C17	H45	Female	36	13.800000190734863	Ceftriaxone	500	mg	2	1000	72.46376711439372	Bacterial LRTI	HAI	Empirical: awaiting culture	No Ventilation	1	1	1	0	0	0	0	0	0	1	0	0	0	0	0	0	0	0
2nd PPS/C17H45P11	2nd PPS	Europe	C17	H45	Male	96	24	Metronidazole	180	mg	3	540	22.5	GI tract infections	CAI	Empirical: pathogen determined	No Ventilation	3	3	0	0	0	0	0	0	0	0	0	0	0	0	0	0	0	0
2nd PPS/C17H45P12	2nd PPS	Europe	C17	H45	Male	96	24	Ceftazidime	1000	mg	3	3000	125	GI tract infections	CAI	Empirical: pathogen determined	No Ventilation	3	3	0	0	0	0	0	0	0	0	0	0	0	0	0	0	0	0
2nd PPS/C17H45P13	2nd PPS	Europe	C17	H45	Male	96	24	Gentamicin	170	mg	1	170	7.083333333333333	GI tract infections	CAI	Empirical: pathogen determined	No Ventilation	3	3	0	0	0	0	0	0	0	0	0	0	0	0	0	0	0	0
2nd PPS/C17H45P14	2nd PPS	Europe	C17	H45	Female	108	27	Ceftriaxone	1000	mg	2	2000	74.07407407407408	Joint/Bone Infections	CAI	Empirical: awaiting culture	No Ventilation	1	1	0	0	0	0	0	0	0	0	0	0	0	0	0	0	0	0
2nd PPS/C17H45P15	2nd PPS	Europe	C17	H45	Male	108	33	Ceftriaxone	1000	mg	2	2000	60.60606060606061	Joint/Bone Infections	CAI	Empirical: pathogen determined	No Ventilation	2	2	0	0	0	0	0	0	0	0	0	0	0	0	0	0	0	0
2nd PPS/C17H45P16	2nd PPS	Europe	C17	H45	Male	120	22	Amikacin	450	mg	1	450	20.454545454545453	Febrile neutropenia/Fever	HAI	Empirical: pathogen determined	No Ventilation	3	3	1	0	0	0	0	0	0	0	0	0	0	0	0	0	0	1
2nd PPS/C17H45P17	2nd PPS	Europe	C17	H45	Male	120	22	Ceftazidime	1000	mg	3	3000	136.36363636363637	Febrile neutropenia/Fever	HAI	Empirical: pathogen determined	No Ventilation	3	3	1	0	0	0	0	0	0	0	0	0	0	0	0	0	0	1
2nd PPS/C17H45P18	2nd PPS	Europe	C17	H45	Male	120	22	Teicoplanin	220	mg	1	220	10	Febrile neutropenia/Fever	HAI	Empirical: pathogen determined	No Ventilation	3	3	1	0	0	0	0	0	0	0	0	0	0	0	0	0	0	1
2nd PPS/C17H45P19	2nd PPS	Europe	C17	H45	Female	6	5	Pip-taz	250	mg	3	750	150	Other	HAI	Empirical: awaiting culture	No Ventilation	1	1	1	0	0	0	0	1	0	0	0	0	0	0	0	0	0	0
2nd PPS/C17H45P20	2nd PPS	Europe	C17	H45	Female	18	12	Clindamycin	180	mg	3	540	45	Lymphadenitis	CAI	Empirical: awaiting culture	No Ventilation	1	1	0	0	0	0	0	0	0	0	0	0	0	0	0	0	0	0
2nd PPS/C17H45P21	2nd PPS	Europe	C17	H45	Male	84	29.700000762939453	Ceftriaxone	1000	mg	1	1000	33.670032805111234	Febrile neutropenia/Fever	HAI	Empirical: awaiting culture	No Ventilation	1	1	1	0	0	0	0	0	0	1	0	0	0	0	0	0	0	0
2nd PPS/C17H45P22	2nd PPS	Europe	C17	H45	Female	48	20	Ceftriaxone	1000	mg	1	1000	50	Febrile neutropenia/Fever	CAI	Empirical: pathogen determined	No Ventilation	1	1	0	0	0	0	0	0	0	0	0	0	0	0	0	0	0	0
2nd PPS/C17H45P23	2nd PPS	Europe	C17	H45	Male	120	28	Ceftriaxone	1000	mg	2	2000	71.42857142857143	Joint/Bone Infections	CAI	Empirical: pathogen determined	No Ventilation	1	1	0	0	0	0	0	0	0	0	0	0	0	0	0	0	0	0
2nd PPS/C17H45P24	2nd PPS	Europe	C17	H45	Male	48	12.399999618530273	Ceftriaxone	900	mg	2	1800	145.16129478827736	Joint/Bone Infections	CAI	Empirical: pathogen determined	No Ventilation	2	2	0	0	0	0	0	0	0	0	0	0	0	0	0	0	0	0
2nd PPS/C17H45P25	2nd PPS	Europe	C17	H45	Male	6	8	Ceftriaxone	800	mg	1	800	100	Lymphadenitis	CAI	Empirical: pathogen determined	No Ventilation	2	2	0	0	0	0	0	0	0	0	0	0	0	0	0	0	0	0
2nd PPS/C17H45P26	2nd PPS	Europe	C17	H45	Female	96	28	Ceftazidime	1000	mg	3	3000	107.14285714285714	Lymphadenitis	CAI	Empirical: pathogen determined	No Ventilation	2	2	0	0	0	0	0	0	0	0	0	0	0	0	0	0	0	0
2nd PPS/C17H45P27	2nd PPS	Europe	C17	H45	Male	7	6.099999904632568	Gentamicin	30	mg	1	30	4.918032863773798	Bacterial LRTI	HAI	Targeted	Invasive Ventilation	4	3	1	0	0	0	0	0	0	0	0	0	0	1	0	0	0	0
2nd PPS/C17H45P28	2nd PPS	Europe	C17	H45	Male	7	6.099999904632568	Teicoplanin	60	mg	1	60	9.836065727547595	Bacterial LRTI	HAI	Empirical: awaiting culture	Invasive Ventilation	4	3	1	0	0	0	0	0	0	0	0	0	0	1	0	0	0	0
2nd PPS/C17H45P29	2nd PPS	Europe	C17	H45	Male	14	4	Ceftazidime	100	mg	3	300	75	Viral LRTI	HAI	Empirical: pathogen determined	No Ventilation	1	1	1	0	0	0	0	0	0	0	0	0	0	1	0	0	0	0
2nd PPS/C17H45P30	2nd PPS	Europe	C17	H45	Female	48	16	Ceftriaxone	1000	mg	1	1000	62.5	Febrile neutropenia/Fever	CAI	Empirical: awaiting culture	No Ventilation	1	1	1	0	0	0	0	0	0	0	1	0	0	0	0	0	0	0
2nd PPS/C17H45P31	2nd PPS	Europe	C17	H45	Female	108	14.300000190734863	Gentamicin	70	mg	1	70	4.895104829813486	Febrile neutropenia/Fever	HAI	Targeted	No Ventilation	3	2	1	0	0	0	0	0	0	0	0	0	1	0	0	0	0	0
2nd PPS/C17H45P32	2nd PPS	Europe	C17	H45	Female	108	14.300000190734863	Teicoplanin	140	mg	1	140	9.790209659626973	Febrile neutropenia/Fever	HAI	Targeted	No Ventilation	3	2	1	0	0	0	0	0	0	0	0	0	1	0	0	0	0	0
2nd PPS/C17H45P33	2nd PPS	Europe	C17	H45	Female	1	3.0999999046325684	Gentamicin	15	mg	1	15	4.838709826275912	Bacterial LRTI	CAI	Empirical: awaiting culture	No Ventilation	2	2	0	0	0	0	0	0	0	0	0	0	0	0	0	0	0	0
2nd PPS/C17H45P34	2nd PPS	Europe	C17	H45	Male	23	14	Meropenem	280	mg	3	840	60	Bacterial LRTI	HAI	Targeted	Invasive Ventilation	3	2	1	0	0	0	0	0	0	1	0	0	0	0	0	0	0	0
2nd PPS/C17H45P35	2nd PPS	Europe	C17	H45	Male	23	14	Gentamicin	84	mg	1	84	6	Bacterial LRTI	HAI	Targeted	Invasive Ventilation	3	2	1	0	0	0	0	0	0	1	0	0	0	0	0	0	0	0
2nd PPS/C17H45P36	2nd PPS	Europe	C17	H45	Female	10	6	Amikacin	110	mg	1	110	18.333333333333332	Bacterial LRTI	HAI	Targeted	Non-Invasive Ventilation	3	2	1	0	0	0	0	0	0	0	0	0	0	1	0	0	0	0
2nd PPS/C17H45P37	2nd PPS	Europe	C17	H45	Male	84	19.799999237060547	Vancomycin	300	mg	3	900	45.4545472060135	GI tract infections	HAI	Empirical: awaiting culture	No Ventilation	2	2	1	0	0	0	0	1	0	0	0	0	0	0	0	0	0	0
2nd PPS/C17H45P38	2nd PPS	Europe	C17	H45	Male	84	19.799999237060547	Metronidazole	150	mg	3	450	22.72727360300675	GI tract infections	HAI	Empirical: awaiting culture	No Ventilation	2	2	1	0	0	0	0	1	0	0	0	0	0	0	0	0	0	0
2nd PPS/C17H45P39	2nd PPS	Europe	C17	H45	Female	132	64.76749935150147	Gentamicin	250	mg	1	250	3.859960667050277	Febrile neutropenia/Fever	CAI	Empirical: pathogen determined	Invasive Ventilation	4	4	0	0	0	0	0	0	0	0	0	0	0	0	0	0	0	0
2nd PPS/C17H45P40	2nd PPS	Europe	C17	H45	Female	132	64.76749935150147	Pip-taz	2000	mg	4	8000	123.51874134560886	Febrile neutropenia/Fever	CAI	Empirical: pathogen determined	Invasive Ventilation	4	4	0	0	0	0	0	0	0	0	0	0	0	0	0	0	0	0
2nd PPS/C17H45P41	2nd PPS	Europe	C17	H45	Female	36	16	Gentamicin	100	mg	1	100	6.25	Febrile neutropenia/Fever	HAI	Empirical: pathogen determined	Invasive Ventilation	3	3	1	0	0	0	0	0	0	1	0	0	0	0	0	0	0	0
2nd PPS/C17H45P42	2nd PPS	Europe	C17	H45	Female	36	16	Vancomycin	240	mg	3	720	45	Febrile neutropenia/Fever	HAI	Empirical: pathogen determined	Invasive Ventilation	3	3	1	0	0	0	0	0	0	1	0	0	0	0	0	0	0	0
2nd PPS/C17H45P43	2nd PPS	Europe	C17	H45	Female	5	3.9000000953674316	Vancomycin	40	mg	4	160	41.02564002243335	Bacterial LRTI	HAI	Empirical: awaiting culture	Invasive Ventilation	3	2	1	0	0	0	0	0	0	0	0	0	0	1	0	0	0	0
2nd PPS/C17H45P44	2nd PPS	Europe	C17	H45	Female	5	3.9000000953674316	Gentamicin	25	mg	1	25	6.410256253505212	Bacterial LRTI	HAI	Targeted	Invasive Ventilation	3	2	1	0	0	0	0	0	0	0	0	0	0	1	0	0	0	0
2nd PPS/C17H45P45	2nd PPS	Europe	C17	H45	Male	96	25.200000762939453	Ciprofloxacin	250	mg	2	500	19.84126924056797	Bacterial LRTI	HAI	Targeted	Invasive Ventilation	3	2	1	0	0	0	0	0	0	0	0	0	1	0	0	0	0	0
2nd PPS/C17H45P46	2nd PPS	Europe	C17	H45	Female	14	8.420000076293945	Pip-taz	800	mg	3	2400	285.03562687096286	Bacterial LRTI	HAI	Empirical: pathogen determined	Non-Invasive Ventilation	1	1	1	0	0	0	0	0	0	0	0	0	0	1	0	0	0	0
2nd PPS/C17H45P47	2nd PPS	Europe	C17	H45	Male	5	5.011000156402588	Pip-taz	250	mg	4	1000	199.5609596464078	Febrile neutropenia/Fever	HAI	Empirical: pathogen determined	Non-Invasive Ventilation	2	2	3	0	0	1	0	0	0	0	0	0	0	1	0	0	0	1
2nd PPS/C17H45P48	2nd PPS	Europe	C17	H45	Male	5	5.011000156402588	Amikacin	90	mg	1	90	17.960486368176703	Febrile neutropenia/Fever	HAI	Empirical: pathogen determined	Non-Invasive Ventilation	2	2	3	0	0	1	0	0	0	0	0	0	0	1	0	0	0	1
2nd PPS/C17H45P49	2nd PPS	Europe	C17	H45	Female	96	38	Metronidazole	300	mg	3	900	23.68421052631579	GI tract infections	CAI	Empirical: awaiting culture	No Ventilation	2	2	0	0	0	0	0	0	0	0	0	0	0	0	0	0	0	0
2nd PPS/C17H45P50	2nd PPS	Europe	C17	H45	Female	96	38	Ceftazidime	1000	mg	3	3000	78.94736842105263	GI tract infections	CAI	Empirical: awaiting culture	No Ventilation	2	2	0	0	0	0	0	0	0	0	0	0	0	0	0	0	0	0
2nd PPS/C17H45P51	2nd PPS	Europe	C17	H45	Female	4	4.300000190734863	Meropenem	100	mg	3	300	69.76743876579468	Other	HAI	Targeted	No Ventilation	1	1	2	0	0	0	0	1	0	0	0	0	0	0	0	0	0	1
2nd PPS/C17H45P52	2nd PPS	Europe	C17	H45	Male	18	13	Ceftriaxone	1000	mg	1	1000	76.92307692307692	Joint/Bone Infections	CAI	Empirical: awaiting culture	No Ventilation	2	2	0	0	0	0	0	0	0	0	0	0	0	0	0	0	0	0
2nd PPS/C17H45P53	2nd PPS	Europe	C17	H45	Female	2	3.740000009536743	Vancomycin	35	mg	1	35	9.358288746190482	Sepsis	HAI	Targeted	Invasive Ventilation	3	3	3	0	0	1	0	0	0	0	0	0	1	0	0	0	0	1
2nd PPS/C17H45P54	2nd PPS	Europe	C17	H45	Female	2	3.740000009536743	Ceftazidime	170	mg	3	510	136.36363601591844	Sepsis	HAI	Targeted	Invasive Ventilation	3	3	3	0	0	1	0	0	0	0	0	0	1	0	0	0	0	1
2nd PPS/C17H45P55	2nd PPS	Europe	C17	H45	Female	2	3.740000009536743	Gentamicin	14	mg	1	14	3.7433154984761927	Sepsis	HAI	Targeted	Invasive Ventilation	3	3	3	0	0	1	0	0	0	0	0	0	1	0	0	0	0	1
2nd PPS/C17H45P56	2nd PPS	Europe	C17	H45	Male	4	3.549999952316284	Vancomycin	50	mg	4	200	56.338028925748326	Central Nervous System (CNS) infections	HAI	Targeted	Non-Invasive Ventilation	2	2	1	0	0	0	0	0	0	0	0	0	0	0	0	1	0	0
2nd PPS/C17H45P57	2nd PPS	Europe	C17	H45	Male	4	3.549999952316284	Gentamicin	13	mg	1	13	3.6619718801736414	Central Nervous System (CNS) infections	HAI	Targeted	Non-Invasive Ventilation	2	2	1	0	0	0	0	0	0	0	0	0	0	0	0	1	0	0
2nd PPS/C17H46P1	2nd PPS	Europe	C17	H46	Female	20	11	Cefotaxime	400	mg	3	1200	109.0909090909091	Viral LRTI	CAI	Empirical: awaiting culture	No Ventilation	1	1	0	0	0	0	0	0	0	0	0	0	0	0	0	0	0	0
2nd PPS/C17H46P2	2nd PPS	Europe	C17	H46	Female	48	18	Cefotaxime	600	mg	3	1800	100	Joint/Bone Infections	CAI	Targeted	No Ventilation	1	1	0	0	0	0	0	0	0	0	0	0	0	0	0	0	0	0
2nd PPS/C17H46P3	2nd PPS	Europe	C17	H46	Male	84	23	Ceftriaxone	1000	mg	1	1000	43.47826086956522	Bacterial LRTI	CAI	Empirical: awaiting culture	No Ventilation	2	1	0	0	0	0	0	0	0	0	0	0	0	0	0	0	0	0
2nd PPS/C17H46P4	2nd PPS	Europe	C17	H46	Male	2	3.940000057220459	Pip-taz	195	mg	3	585	148.47715520407843	GI tract infections	Unknown	Empirical: awaiting culture	No Ventilation	1	1	2	0	0	0	0	1	1	0	0	0	0	0	0	0	0	0
2nd PPS/C17H46P5	2nd PPS	Europe	C17	H46	Female	72	10	Amikacin	125	mg	1	125	12.5	Urinary Tract Infections (UTI)	CAI	Targeted	No Ventilation	1	1	1	0	0	0	0	0	0	0	0	0	0	0	0	0	1	0
2nd PPS/C17H46P6	2nd PPS	Europe	C17	H46	Female	132	27	Meropenem	1000	mg	3	3000	111.11111111111111	Bacterial LRTI	CAI	Targeted	No Ventilation	5	2	1	0	0	0	0	0	0	0	0	0	0	0	0	0	0	1
2nd PPS/C17H46P7	2nd PPS	Europe	C17	H46	Female	108	25	Vancomycin	250	mg	2	500	20	Bacterial LRTI	HAI	Empirical: no culture	No Ventilation	2	2	1	0	0	0	0	0	0	0	0	0	0	0	0	0	1	0
2nd PPS/C17H46P8	2nd PPS	Europe	C17	H46	Male	72	25	Meropenem	750	mg	3	2250	90	Bacterial LRTI	CAI	Targeted	No Ventilation	1	1	0	0	0	0	0	0	0	0	0	0	0	0	0	0	0	0
2nd PPS/C17H46P9	2nd PPS	Europe	C17	H46	Male	84	23	Cefotaxime	800	mg	3	2400	104.34782608695652	Sepsis	CAI	Empirical: pathogen determined	No Ventilation	1	1	1	0	0	0	0	1	0	0	0	0	0	0	0	0	0	0
2nd PPS/C17H46P10	2nd PPS	Europe	C17	H46	Female	72	23	Clindamycin	250	mg	3	750	32.608695652173914	Joint/Bone Infections	CAI	Empirical: pathogen determined	No Ventilation	1	1	0	0	0	0	0	0	0	0	0	0	0	0	0	0	0	0
2nd PPS/C17H46P11	2nd PPS	Europe	C17	H46	Male	12	9	Cefotaxime	180	mg	3	540	60	Urinary Tract Infections (UTI)	CAI	Empirical: no culture	No Ventilation	1	1	0	0	0	0	0	0	0	0	0	0	0	0	0	0	0	0
2nd PPS/C17H46P12	2nd PPS	Europe	C17	H46	Female	48	19	Cefotaxime	650	mg	3	1950	102.63157894736842	Upper Respiratory Infections (URTI)	CAI	Empirical: awaiting culture	No Ventilation	1	1	0	0	0	0	0	0	0	0	0	0	0	0	0	0	0	0
3rd PPS/C17H45P58	3rd PPS	Europe	C17	H45	Female	84	24.399999618530273	Teicoplanin	250	mg	1	250	10.245901799528744	Febrile neutropenia/Fever	HAI	Empirical: awaiting culture	Unknown	3	2	1	0	0	0	0	0	0	1	0	0	0	0	0	0	0	0
3rd PPS/C17H45P59	3rd PPS	Europe	C17	H45	Female	84	24.399999618530273	Meropenem	800	mg	3	2400	98.36065727547594	Febrile neutropenia/Fever	HAI	Empirical: awaiting culture	Unknown	3	2	1	0	0	0	0	0	0	1	0	0	0	0	0	0	0	0
3rd PPS/C17H45P60	3rd PPS	Europe	C17	H45	Female	60	18	Ceftriaxone	900	mg	2	1800	100	Central Nervous System (CNS) infections	CAI	Empirical: pathogen determined	No Ventilation	1	1	0	0	0	0	0	0	0	0	0	0	0	0	0	0	0	0
3rd PPS/C17H45P61	3rd PPS	Europe	C17	H45	Female	24	11	Ceftazidime	500	mg	3	1500	136.36363636363637	Joint/Bone Infections	CAI	Empirical: pathogen determined	No Ventilation	1	1	0	0	0	0	0	0	0	0	0	0	0	0	0	0	0	0
3rd PPS/C17H45P62	3rd PPS	Europe	C17	H45	Male	1	3.1500000953674316	Ceftazidime	100	mg	3	300	95.23809235472626	Urinary Tract Infections (UTI)	CAI	Targeted	No Ventilation	1	1	1	0	0	0	0	0	0	0	0	0	0	0	1	0	0	0
3rd PPS/C17H45P63	3rd PPS	Europe	C17	H45	Female	60	18	Vancomycin	270	mg	3	810	45	Joint/Bone Infections	CAI	Empirical: awaiting culture	No Ventilation	2	2	0	0	0	0	0	0	0	0	0	0	0	0	0	0	0	0
3rd PPS/C17H45P64	3rd PPS	Europe	C17	H45	Female	60	18	Ceftazidime	800	mg	3	2400	133.33333333333334	Joint/Bone Infections	CAI	Empirical: awaiting culture	No Ventilation	2	2	0	0	0	0	0	0	0	0	0	0	0	0	0	0	0	0
3rd PPS/C17H45P65	3rd PPS	Europe	C17	H45	Male	36	11	Ceftazidime	400	mg	3	1200	109.0909090909091	Bacterial LRTI	HAI	Targeted	Invasive Ventilation	1	1	1	0	0	0	0	0	0	0	0	0	0	1	0	0	0	0
3rd PPS/C17H45P66	3rd PPS	Europe	C17	H45	Female	4	6.389999866485596	Ceftazidime	250	mg	3	750	117.37089447115885	GI tract infections	CAI	Empirical: awaiting culture	No Ventilation	1	1	0	0	0	0	0	0	0	0	0	0	0	0	0	0	0	0
3rd PPS/C17H45P67	3rd PPS	Europe	C17	H45	Female	4	4.659999847412109	Pip-taz	300	mg	4	1200	257.5107380457125	Febrile neutropenia/Fever	HAI	Empirical: pathogen determined	No Ventilation	1	1	1	0	0	0	0	1	0	0	0	0	0	0	0	0	0	0
3rd PPS/C17H45P68	3rd PPS	Europe	C17	H45	Female	16	10	Amikacin	180	mg	1	180	18	Sepsis	CAI	Empirical: awaiting culture	Non-Invasive Ventilation	1	1	1	0	0	0	0	0	1	0	0	0	0	0	0	0	0	0
3rd PPS/C17H45P69	3rd PPS	Europe	C17	H45	Male	60	18	Gentamicin	100	mg	1	100	5.555555555555555	CRBSI	HAI	Empirical: pathogen determined	No Ventilation	3	3	1	0	0	0	0	1	0	0	0	0	0	0	0	0	0	0
3rd PPS/C17H45P70	3rd PPS	Europe	C17	H45	Male	60	18	Metronidazole	140	mg	3	420	23.333333333333332	CRBSI	HAI	Empirical: pathogen determined	No Ventilation	3	3	1	0	0	0	0	1	0	0	0	0	0	0	0	0	0	0
3rd PPS/C17H45P71	3rd PPS	Europe	C17	H45	Male	60	18	Ceftazidime	900	mg	3	2700	150	CRBSI	HAI	Empirical: pathogen determined	No Ventilation	3	3	1	0	0	0	0	1	0	0	0	0	0	0	0	0	0	0
3rd PPS/C17H45P72	3rd PPS	Europe	C17	H45	Male	4	7.760000228881836	Teicoplanin	75	mg	1	75	9.664948168539809	GI tract infections	HAI	Empirical: pathogen determined	No Ventilation	2	2	1	0	0	0	0	1	0	0	0	0	0	0	0	0	0	0
3rd PPS/C17H45P73	3rd PPS	Europe	C17	H45	Male	4	7.760000228881836	Meropenem	220	mg	3	660	85.05154388315032	GI tract infections	HAI	Empirical: pathogen determined	No Ventilation	2	2	1	0	0	0	0	1	0	0	0	0	0	0	0	0	0	0
3rd PPS/C17H45P74	3rd PPS	Europe	C17	H45	Male	24	11	Ceftazidime	550	mg	3	1650	150	Febrile neutropenia/Fever	CAI	Empirical: pathogen determined	No Ventilation	1	1	1	0	0	0	0	1	0	0	0	0	0	0	0	0	0	0
3rd PPS/C17H45P75	3rd PPS	Europe	C17	H45	Male	2	6.269999980926514	Ceftazidime	300	mg	3	900	143.5406702931134	Urinary Tract Infections (UTI)	CAI	Empirical: awaiting culture	No Ventilation	1	1	0	0	0	0	0	0	0	0	0	0	0	0	0	0	0	0
3rd PPS/C17H45P76	3rd PPS	Europe	C17	H45	Female	72	25	Ceftriaxone	1000	mg	2	2000	80	Skin/Soft Tissue Infections (SSTI)	CAI	Empirical: awaiting culture	No Ventilation	2	2	0	0	0	0	0	0	0	0	0	0	0	0	0	0	0	0
3rd PPS/C17H45P77	3rd PPS	Europe	C17	H45	Female	36	15.800000190734863	Clindamycin	150	mg	3	450	28.481012314410002	Skin/Soft Tissue Infections (SSTI)	CAI	Empirical: pathogen determined	No Ventilation	2	2	0	0	0	0	0	0	0	0	0	0	0	0	0	0	0	0
3rd PPS/C17H45P78	3rd PPS	Europe	C17	H45	Female	36	15.800000190734863	Ceftazidime	600	mg	3	1800	113.92404925764001	Skin/Soft Tissue Infections (SSTI)	CAI	Empirical: pathogen determined	No Ventilation	2	2	0	0	0	0	0	0	0	0	0	0	0	0	0	0	0	0
3rd PPS/C17H45P79	3rd PPS	Europe	C17	H45	Male	108	23	Teicoplanin	200	mg	1	200	8.695652173913043	Febrile neutropenia/Fever	HAI	Empirical: pathogen determined	No Ventilation	3	2	1	0	0	0	0	0	0	1	0	0	0	0	0	0	0	0
3rd PPS/C17H45P80	3rd PPS	Europe	C17	H45	Male	120	27	Ceftriaxone	1000	mg	1	1000	37.03703703703704	Central Nervous System (CNS) infections	CAI	Empirical: awaiting culture	No Ventilation	1	1	0	0	0	0	0	0	0	0	0	0	0	0	0	0	0	0
3rd PPS/C17H45P81	3rd PPS	Europe	C17	H45	Female	36	13.899999618530273	Teicoplanin	145	mg	1	145	10.431654962543925	Febrile neutropenia/Fever	CAI	Empirical: pathogen determined	No Ventilation	1	1	1	0	0	0	0	0	0	1	0	0	0	0	0	0	0	0
3rd PPS/C17H45P82	3rd PPS	Europe	C17	H45	Female	60	26.200000762939453	Meropenem	500	mg	3	1500	57.25190672978098	Febrile neutropenia/Fever	HAI	Empirical: pathogen determined	No Ventilation	2	1	1	0	0	0	0	0	0	1	0	0	0	0	0	0	0	0
3rd PPS/C17H45P83	3rd PPS	Europe	C17	H45	Female	5	4.400000095367432	Ceftriaxone	250	mg	1	250	56.81818058668092	Febrile neutropenia/Fever	HAI	Empirical: awaiting culture	Unknown	1	1	1	0	0	0	0	0	0	0	0	0	0	0	0	1	0	0
3rd PPS/C17H45P84	3rd PPS	Europe	C17	H45	Female	24	13	Gentamicin	80	mg	1	80	6.153846153846154	Skin/Soft Tissue Infections (SSTI)	CAI	Empirical: pathogen determined	No Ventilation	2	2	0	0	0	0	0	0	0	0	0	0	0	0	0	0	0	0
3rd PPS/C17H45P85	3rd PPS	Europe	C17	H45	Male	24	13.5	Metronidazole	100	mg	3	300	22.22222222222222	GI tract infections	CAI	Empirical: awaiting culture	No Ventilation	2	2	0	0	0	0	0	0	0	0	0	0	0	0	0	0	0	0
3rd PPS/C17H45P86	3rd PPS	Europe	C17	H45	Male	24	13.5	Ceftazidime	450	mg	3	1350	100	GI tract infections	CAI	Empirical: awaiting culture	No Ventilation	2	2	0	0	0	0	0	0	0	0	0	0	0	0	0	0	0	0
3rd PPS/C17H45P87	3rd PPS	Europe	C17	H45	Male	48	18	Ceftazidime	600	mg	3	1800	100	GI tract infections	CAI	Empirical: awaiting culture	No Ventilation	1	1	0	0	0	0	0	0	0	0	0	0	0	0	0	0	0	0
3rd PPS/C17H45P88	3rd PPS	Europe	C17	H45	Male	12	12	Ceftriaxone	1000	mg	1	1000	83.33333333333333	Febrile neutropenia/Fever	CAI	Empirical: awaiting culture	No Ventilation	1	1	0	0	0	0	0	0	0	0	0	0	0	0	0	0	0	0
3rd PPS/C17H45P89	3rd PPS	Europe	C17	H45	Male	10	7	Gentamicin	50	mg	1	50	7.142857142857143	Bacterial LRTI	CAI	Empirical: awaiting culture	No Ventilation	2	2	1	0	0	0	0	0	0	0	0	0	0	1	0	0	0	0
3rd PPS/C17H45P90	3rd PPS	Europe	C17	H45	Female	2	2.380000114440918	Teicoplanin	20	mg	1	20	8.403360940467085	Sepsis	HAI	Empirical: awaiting culture	No Ventilation	2	2	3	0	0	1	0	1	0	0	0	0	0	1	0	0	0	0
3rd PPS/C17H45P91	3rd PPS	Europe	C17	H45	Female	2	2.380000114440918	Meropenem	35	mg	3	105	44.11764493745219	Sepsis	HAI	Empirical: awaiting culture	No Ventilation	2	2	3	0	0	1	0	1	0	0	0	0	0	1	0	0	0	0
3rd PPS/C17H45P92	3rd PPS	Europe	C17	H45	Male	1	2.799999952316284	Meropenem	50	mg	3	150	53.57142948374458	Sepsis	HAI	Empirical: awaiting culture	No Ventilation	3	3	1	0	0	0	0	0	0	0	0	0	0	1	0	0	0	0
3rd PPS/C17H45P93	3rd PPS	Europe	C17	H45	Male	1	2.799999952316284	Teicoplanin	25	mg	1	25	8.928571580624096	Sepsis	HAI	Empirical: awaiting culture	No Ventilation	3	3	1	0	0	0	0	0	0	0	0	0	0	1	0	0	0	0
3rd PPS/C17H45P94	3rd PPS	Europe	C17	H45	Male	1	2.799999952316284	Gentamicin	12	mg	1	12	4.2857143586995665	Sepsis	HAI	Empirical: awaiting culture	No Ventilation	3	3	1	0	0	0	0	0	0	0	0	0	0	1	0	0	0	0
3rd PPS/C17H45P95	3rd PPS	Europe	C17	H45	Female	84	25	Meropenem	800	mg	3	2400	96	Febrile neutropenia/Fever	CAI	Empirical: awaiting culture	No Ventilation	1	1	1	0	0	0	0	0	1	0	0	0	0	0	0	0	0	0
3rd PPS/C17H46P13	3rd PPS	Europe	C17	H46	Male	24	12	Pip-taz	750	mg	3	2250	187.5	Bacterial LRTI	CAI	Targeted	No Ventilation	2	2	1	0	0	0	0	0	0	0	0	0	0	0	0	0	0	1
3rd PPS/C17H46P14	3rd PPS	Europe	C17	H46	Male	10	5.900000095367432	Cefotaxime	300	mg	3	900	152.5423704156654	Bacterial LRTI	CAI	Targeted	Non-Invasive Ventilation	1	1	1	0	0	1	0	0	0	0	0	0	0	0	0	0	0	0
3rd PPS/C17H46P15	3rd PPS	Europe	C17	H46	Female	36	15.699999809265137	Cefotaxime	500	mg	3	1500	95.54140243459085	Bacterial LRTI	CAI	Empirical: awaiting culture	No Ventilation	2	2	0	0	0	0	0	0	0	0	0	0	0	0	0	0	0	0
3rd PPS/C17H46P16	3rd PPS	Europe	C17	H46	Male	72	29.600000381469727	Teicoplanin	300	mg	1	300	10.135135004518677	Joint/Bone Infections	CAI	Targeted	No Ventilation	1	1	0	0	0	0	0	0	0	0	0	0	0	0	0	0	0	0
3rd PPS/C17H46P17	3rd PPS	Europe	C17	H46	Male	24	13	Cefotaxime	450	mg	3	1350	103.84615384615384	Bacterial LRTI	CAI	Empirical: awaiting culture	No Ventilation	2	2	0	0	0	0	0	0	0	0	0	0	0	0	0	0	0	0
3rd PPS/C17H46P18	3rd PPS	Europe	C17	H46	Female	24	6.300000190734863	Ceftazidime	200	mg	3	600	95.23809235472626	Urinary Tract Infections (UTI)	CAI	Targeted	No Ventilation	1	1	3	1	0	1	0	1	0	0	0	0	0	0	0	0	1	0
3rd PPS/C17H46P19	3rd PPS	Europe	C17	H46	Female	24	15.399999618530273	Cefotaxime	500	mg	3	1500	97.40259981533397	Bacterial LRTI	CAI	Empirical: awaiting culture	Non-Invasive Ventilation	2	2	0	0	0	0	0	0	0	0	0	0	0	0	0	0	0	0
3rd PPS/C17H46P20	3rd PPS	Europe	C17	H46	Female	48	13.800000190734863	Cefotaxime	400	mg	3	1200	86.95652053727245	Bacterial LRTI	CAI	Empirical: awaiting culture	No Ventilation	1	1	1	0	0	0	0	1	0	0	0	0	0	0	0	0	0	0
3rd PPS/C17H46P21	3rd PPS	Europe	C17	H46	Male	72	22	Cefotaxime	700	mg	3	2100	95.45454545454545	Bacterial LRTI	CAI	Empirical: awaiting culture	No Ventilation	2	2	0	0	0	0	0	0	0	0	0	0	0	0	0	0	0	0
3rd PPS/C17H46P22	3rd PPS	Europe	C17	H46	Male	9	9	Amikacin	130	mg	1	130	14.444444444444445	Urinary Tract Infections (UTI)	CAI	Targeted	No Ventilation	1	1	1	0	0	0	0	0	0	0	0	0	0	0	0	0	1	0
[truncated: 1,389 more rows]
